# Supplementary material for: Identification of microRNA precursors using reduced and hybrid features
Source: Royal Society of Chemistry journal article supplement (doi:10.1039/c7mb00115k), 2017-06-15
Supplement: c7mb00115k1.csv [file c7mb00115k1.csv]

V1	V2	V3	V4	V5	V6	V7	V8	V9	V10	V11	V12	V13	V14	V15	V16	V17	V18	V19	V20	V21	V22	V23	V24	V25	V26	V27	V28	V29	V30	V31	V32	V33	V34	V35	V36	V37	V38	V39	V40
12.19687669	-0.417612063	2.792979364	-3.387333286	0.763734488	-0.385359447	-2.185618938	0.263643477	0.327466405	1.23288966	-0.872400211	-1.321613315	-1.93140776	2.119378217	1.63226922	1.393891305	-0.746060191	-0.04814731	-0.043604107	-0.459148781	0.47912164	-1.020555698	0.401299912	0.638703458	-0.259351588	0.378623624	2.297244951	-0.674954424	-0.069305376	-0.057057943	0.725173339	0.189234504	-0.009115346	-0.166334595	-0.508808987	0.526500902	0.041873529	0.687428284	0.014097914	0.29176178
10.31073493	1.780909546	4.34886558	2.676924397	1.706737513	-3.174738554	-1.034482272	0.432139059	0.964602364	2.151053106	-0.061272259	-1.624011716	-1.654178973	0.47686694	0.199198417	0.959246779	-1.614755055	-1.083427146	0.460571655	-0.269509823	1.078643531	-0.378676966	-1.234657629	0.866055512	-0.777823395	-1.837059727	0.797590284	-0.742995462	1.214350995	0.012521579	0.016264398	-0.502754935	0.892342685	-0.563475316	-0.01283007	0.949431129	-0.444246859	-0.379796745	0.006093109	-0.11340289
7.132080484	8.301294731	3.913407542	2.917745862	-0.462474996	-3.175599523	1.587973911	-0.331218673	-1.234621854	1.666004553	1.44732055	0.272080148	-1.334757056	1.510433529	0.369629393	0.133789722	-0.389534872	-0.198898426	-0.27290068	0.342810633	-0.078003319	0.296902737	0.474205338	2.03060105	-0.207146829	-1.013286962	1.587119205	-0.121779487	0.949346118	-0.169379306	-0.417693276	-0.366142224	0.394258822	-0.354845267	-0.378240406	0.07717353	-0.27566783	0.478470105	0.073734638	-0.428116105
20.91952148	-3.331107388	3.337403724	0.182548405	3.703749872	1.196699566	-1.368964386	-0.336957533	-1.278676978	-0.001020325	0.353791523	0.011186768	-1.917422533	1.10097181	-1.191417657	-0.243660258	-0.220658758	0.042747298	-1.518315445	-0.729659271	-0.289274421	0.394218011	-0.338698975	0.252161333	-0.977551301	-1.378231927	2.131668417	-0.320329251	-0.005844623	0.117042522	0.244445756	-0.000752951	-0.518663137	-0.266126972	0.024577232	0.53418435	-0.077684824	0.347635297	0.169521361	0.009938653
17.43873972	-2.149626581	6.435349047	0.591919114	2.723938397	1.818167507	-1.849887778	-1.759951984	0.891141122	0.085922563	1.019360701	0.612519316	-3.424295489	1.63106086	-1.007240187	0.432086922	-1.218404139	-0.182284497	-1.415011139	-0.234153051	-0.361716679	-0.222629705	-0.923847329	0.417613651	-0.841325934	-0.445708528	1.732451676	-0.054530113	0.495854234	0.283702067	0.391690705	-0.134487991	-0.178164505	-0.005964338	-0.139380322	0.130620284	-0.227322571	0.26654624	0.217484736	0.050415506
13.28508585	2.787461482	0.002331954	-0.392932188	1.970509335	-0.970892529	-1.378261841	-2.847694206	0.740207445	-0.125759593	-1.047640324	-0.102173826	-1.605127703	1.231373901	0.570849314	-0.321288832	-0.446946033	-0.061645527	-0.523823493	0.044759912	1.950831518	0.403695538	0.533629391	1.301575189	0.103401952	-0.366876268	1.402661069	-0.776993889	1.268343786	0.391510732	-0.034557905	-0.612742086	0.325086696	-0.164893689	0.794602125	0.367696433	-0.470296576	0.028728092	0.480486752	0.018018295
5.330731494	5.96657246	3.868364529	-0.881053063	5.458205387	0.87567346	-5.103559202	0.263269842	2.967248099	2.331471967	-0.703047321	-1.218163536	-0.217330721	-2.283782924	-1.461218672	-0.787770411	0.189461456	-1.086073457	-0.682607934	1.111787901	0.649122122	-0.229130805	1.316493013	-0.090755655	-1.280322429	-1.751251667	0.509193851	-0.255737941	-0.513198754	-0.658927013	-0.380084738	-0.085743091	-0.017847724	-0.633145464	-0.304637218	0.170794133	-0.862729738	-0.18584381	0.282655053	0.132996167
20.17303096	-13.15479789	-0.511442941	-1.425779722	1.302238579	0.995863187	-1.130050273	-3.579221897	1.704009476	1.206342584	1.787726088	-0.73311827	-1.0224179	2.239746077	-0.92151829	-0.237305045	-1.157935746	-1.174608284	-0.981620195	0.712211576	-0.149580553	-0.319722395	-1.338453786	0.899900561	0.019574557	0.083166553	0.541857805	-0.862899151	0.021586664	0.048443559	1.046320584	0.221068384	0.504095195	0.295463306	0.538749133	0.199461002	0.134588089	-0.180552605	0.185273785	0.10198048
26.26207479	-2.564173098	-5.200484654	3.905614478	1.612649911	1.685538536	-1.527398817	2.147460512	3.793327244	-0.181707983	-0.124523605	0.60303902	-0.828571679	-0.576146207	-0.701164989	0.598078578	0.990827431	0.032526777	-0.693616564	-0.235800177	2.328048845	1.304091366	0.914659443	-0.602470814	0.252226654	0.818795435	0.537296975	-0.058426837	0.275481194	-0.021266318	1.181481041	-0.211392258	-0.154990776	-0.42623014	0.439781272	0.250287298	-0.105496273	0.033460222	0.101441783	0.269849987
8.451757674	1.472942565	-8.366729891	4.815491812	-3.012631315	1.002863011	-1.629265604	1.357755049	2.430013525	1.302834511	-0.269447605	-1.26526105	-1.253548527	-1.685865833	-0.200787243	-0.669554241	1.778551405	-0.327273273	-0.76945143	-0.604236963	0.04442578	0.08106701	0.748899332	-0.583703747	0.116741656	1.223321995	0.525206808	-1.06181311	-0.594330069	-0.382179147	0.407744216	0.345425094	-0.152229584	-0.261185852	-0.221090151	-0.063602556	-0.336912934	-0.022901333	0.296613188	0.464354188
7.391998164	-0.959792459	-1.55572003	5.661282793	3.958472906	0.486511921	-5.448608055	-1.9653633	-0.800709018	-2.526294825	-1.533260181	0.628111626	-1.910317146	-0.91747628	0.945136106	0.700064851	1.476055687	1.775361673	-1.255491165	1.388871482	1.366410121	-0.51430105	0.017003003	-1.628561878	0.110678214	0.720040436	1.628129771	0.150764232	0.509394605	0.052364343	0.507148205	-0.384416316	-0.791087177	-0.177370695	0.785155577	0.629689815	-0.758277495	-0.302202268	-0.388429684	0.015137649
19.31753516	-7.837421448	-1.666793173	-2.842164242	3.00262017	-0.407951174	0.245663142	0.525591911	1.317570831	2.582227594	0.571927998	-1.716343907	-0.27468983	3.168219065	-0.04874919	1.13142912	1.033198353	2.470065903	0.246240877	-0.146041515	-0.238559343	0.20432093	0.403535079	-0.374715515	1.315556599	0.900263831	1.083745789	-0.208037518	-0.230590128	0.302575447	-0.149363873	0.316467121	-0.452795576	0.763336929	-0.762985489	-0.46070595	-0.511017856	0.606090649	-0.093068198	0.24157571
20.39014847	-4.902642383	-5.463792954	-2.828663135	-1.627597793	-0.107729735	0.933483231	-1.1432529	-0.491250713	1.996674476	0.031382029	-0.012725238	0.134400543	0.151272408	0.140335183	1.273546933	-0.231593288	2.493493605	-0.477638914	0.394178769	-0.919834005	-0.741589779	-1.503135238	0.281054372	1.881643315	-0.185638767	-0.135621462	-0.307153419	0.110415774	0.070000121	0.596302039	0.074992868	-0.623770504	0.931508723	0.50495773	-0.199825203	-0.208601303	0.159805589	-0.209748422	0.320989582
10.92520962	-16.68531262	-4.924166242	1.247674932	2.890000703	4.61890584	-1.302612657	3.036392723	-1.627510837	1.603810817	1.474512562	-1.112355808	-1.39120191	2.010258703	0.516293618	-2.08837433	0.827398033	1.45261373	-0.909006209	1.344154333	0.301745544	0.916459813	0.40828138	0.951363492	1.105400161	0.472655007	-0.509624649	0.127752239	0.566470062	0.85565051	0.385720836	-0.161203191	0.308507212	-0.256722325	0.002003131	0.246324244	0.407831744	-1.218060876	-0.842150941	0.654865288
20.64393362	-11.66358935	-7.990727934	-1.81428341	-0.045916722	-1.776072345	-2.108442023	-0.626380519	1.706497892	-0.765561051	0.521585391	-1.321281938	-2.746662655	3.889651863	0.561053069	0.913798285	1.041082163	3.267662172	0.209755522	1.22347317	-1.140452104	-0.225012355	-1.44234335	-0.443973461	0.047590664	-0.868908105	-0.237515192	-0.688636486	0.228607235	-0.145646357	-0.023748793	0.491915731	1.126412985	-0.945252762	-0.11368938	0.104926115	0.12572824	-0.332441854	-0.732201923	0.334806613
-5.905396456	-11.01390167	3.879960036	6.095756983	2.204312995	-5.019139283	-1.273533154	-0.079084386	3.479933117	-0.255744901	0.870309156	-1.601079992	2.522434532	0.511222443	2.017869591	-0.68632924	0.160729933	-1.998364945	0.69583035	-0.164721847	0.579307961	0.535625689	0.564809883	0.449246674	0.668176725	-1.388284991	0.025420174	0.701864903	-0.348361312	0.023493138	-0.646936362	-0.276882728	0.120912292	-0.07034509	-0.087420993	-0.316195525	-0.208021146	-0.688566431	-0.614744411	-0.062905865
12.94351372	-15.93472126	-6.86417018	-0.845061536	0.138018125	0.263872818	1.099863235	0.629878054	2.426093769	-1.011947078	-1.416895643	-0.655498217	1.373150379	0.495453135	1.515111124	0.918003899	-1.56153341	-0.765529753	1.48847152	0.493387165	-0.691086981	0.907181018	-0.362221136	-0.541202418	-1.169547497	-0.222740671	-0.009510827	-0.120628251	0.794613793	0.571474655	-0.847835901	-0.071845204	0.208868015	0.410773857	-0.074914529	0.261219616	-0.209360914	0.002314941	-0.232129686	-0.250527918
12.87586302	-6.467814314	0.186099486	2.807419274	2.848657298	0.809976025	-0.89279334	-0.497263464	3.245598892	1.097309758	0.995358955	0.332527287	2.151773663	0.411176663	2.084535868	-1.283079334	-2.127824685	-1.336476708	-0.525205926	-0.443914422	-0.573997889	0.131304081	-0.157122907	-0.298040762	-0.696335187	-1.221439623	0.330005543	-0.152718047	-0.256407503	0.690752567	-0.44127849	-0.189020404	-0.203620278	-0.009498773	-1.260241662	0.034991573	-0.139656734	0.562483475	0.074321858	-0.196502716
5.844678026	-11.23337524	2.357517396	3.131048447	2.330609902	1.555904432	-1.582023556	-1.690029315	2.768778977	0.967401727	2.711503259	-1.205295114	1.679218829	0.915287487	2.226282127	-2.989993265	-0.604281427	-1.018911063	0.879671998	2.1125665	1.14161624	0.325611547	0.427492771	1.011651948	-0.640646851	-0.538094064	0.260536195	-0.00870922	0.60713118	0.618336256	-0.752777431	-0.303436743	-0.392601422	1.096680524	-0.282673936	-0.043760865	-0.275317977	0.210233492	0.203587879	0.136925254
14.66533488	-7.180989418	-5.282905517	-3.652825406	4.735413001	0.220468396	0.080484104	-0.969396478	0.931941596	1.121664657	-0.829874236	0.319496558	-0.303747262	-0.129621628	1.959482965	-2.709431944	-0.121245593	-0.753346913	1.306611862	0.13211221	-0.623922521	0.357834158	-0.05573911	-0.090447289	0.611518895	-0.31442446	0.393555353	0.076479019	-0.161200294	0.039413831	0.410637497	-0.216873321	-0.291436901	0.121091244	-0.633934652	0.000646697	-0.553775241	0.112486542	0.805227352	-0.777478471
4.848893903	-1.413934543	5.928574734	-0.310276405	0.275939632	0.349221155	-1.173001037	-0.973416858	3.339271481	2.44859845	-0.821970363	-0.578647755	0.655091501	-0.348416624	1.578815251	-1.095298071	-0.336892538	0.57675041	1.579619767	1.570398187	-0.525893028	0.039387924	-0.883348034	0.584305923	0.84952064	-1.074841942	-0.318694009	-1.21871375	-0.520595551	0.280240317	-0.064144647	0.225128143	0.275197665	-0.129985495	-0.749001228	0.239419881	-0.143519222	0.606013814	0.359831983	0.143724707
18.17932951	-2.360385229	-0.910488188	-0.4748481	1.274882711	-0.530490789	-2.374101124	-1.518484615	2.063616729	0.341114786	-1.797119172	-2.13829161	0.526935646	-1.413755675	0.271282152	-1.252715161	0.526774588	-0.328076992	0.490113221	-0.081817538	0.022468759	0.102676631	0.70695675	-0.198331311	-0.113772395	-1.278548358	0.500380062	1.301075276	-0.340029891	-1.39689679	-0.06898239	-0.168053085	-0.417717344	0.134741638	-0.051259918	-0.09469283	0.160935588	-0.141427389	-0.457750569	0.399937195
24.1740198	-13.78213328	-7.463094056	-5.22654922	3.94833152	4.18042027	-2.366806755	-0.519291524	2.81043421	-1.180202901	1.343999905	0.400305279	1.318353957	1.405540019	-0.384850602	-0.490200478	-0.450737833	-1.816442211	0.389290707	-0.836909659	-0.723515157	1.066808867	1.070951805	0.748523203	-0.150182364	-0.804458913	0.938997528	1.739017897	1.117158944	-1.135978434	-0.437897576	0.106197728	1.017873787	0.841995126	0.426549193	0.186031114	0.216547853	-0.74266915	-0.470767196	-0.134896346
14.31643699	-5.435094869	3.776390227	-1.673172609	2.595281933	0.768812994	-1.997270712	-2.565528043	1.548366162	1.497777995	-0.298011057	-1.733396341	0.139872076	-0.886388415	1.725399496	-2.758443558	-1.97009942	-1.172742674	-0.049273243	-0.305971404	-0.002708104	-0.887348555	-0.498394136	1.704450576	-0.246112401	-1.139690966	0.961963696	-0.517649531	0.300340374	0.895653729	0.326771885	0.230549174	-0.601596523	0.139689588	-1.221156525	0.003471113	-0.576985891	0.672718977	0.843346975	-0.193232747
9.220141105	-4.087014075	1.728625386	-5.384892073	1.131967142	1.190481594	-0.874152092	-2.876615223	0.777490888	1.609542214	0.24774214	1.214896818	0.895172089	2.212920532	2.379379162	-1.717109016	-0.977105371	0.506465574	1.356677902	0.052249665	0.738180705	-0.954697082	-0.952864815	0.242091482	0.022830902	-0.050312596	0.274803654	-0.44919824	-0.028857186	-0.054620248	0.371239797	0.448689884	0.250910169	0.307632957	-0.213658811	0.365861447	-0.601292223	0.190830485	0.369054289	0.105570697
13.18822664	4.25305681	4.258300535	-2.437606201	1.279316692	0.208918769	0.137972267	0.845196904	5.272270699	-1.247677669	-0.231670171	2.767099632	-0.178964238	-0.854276848	-0.050257045	1.077572084	0.986149374	0.322642306	-1.303599753	0.954690343	0.701716544	0.265874852	-0.057397016	-0.689610217	-0.695969966	1.378460801	-0.077479747	0.455976189	-0.045794498	0.449332567	-0.561130479	-0.547406078	-0.544801807	-0.219969315	-0.60054602	-0.462415518	-0.238802097	0.105382614	0.539997865	0.341677499
14.03563951	5.763993881	-1.995561051	-0.459698891	0.206645469	3.377231776	-0.985984953	-1.718679231	1.763476184	1.442401776	-2.257098895	0.715776635	2.307874884	-1.344946199	-0.241599385	1.400186785	-0.432941545	0.264647445	0.094929937	-0.460830748	-0.6495208	-1.636504204	-1.425991519	-1.38032741	-0.450560547	-1.569648154	0.9486986	0.190156317	-0.260359344	0.585562237	-0.196660333	-0.089885614	-0.370591853	-0.074079749	-0.706741407	0.417808682	0.371075729	0.067740887	-0.507732145	-0.176951108
4.726526035	6.037389216	3.658633359	-1.385798101	1.085886311	2.584804951	3.588840633	3.769882661	1.53298013	-1.370623601	0.771897944	0.461194111	-0.029498583	1.303083553	-0.789029266	2.305686272	1.708969427	-0.007217531	0.868689432	-1.513438164	-1.328256587	-1.120023447	0.581646434	0.517150197	-0.854714951	1.117986219	-0.052203287	0.712857096	-0.604294919	-0.385818907	0.003537848	-0.170586306	0.368406615	-0.369322319	0.473653547	-0.115971521	0.015161285	-0.276274913	0.319718028	0.266732204
9.330590223	1.1241062	-3.947500987	1.737549603	0.117943364	2.668724744	0.036049364	2.851749325	1.927447183	-2.589191275	-2.038101561	-0.202799648	1.163275422	-0.527727991	-1.011461885	-0.342195895	0.418113761	-1.775518812	0.59023831	0.183526093	0.456236453	-1.16051721	1.008079766	1.447327103	0.097710894	1.371973986	0.104725866	0.615562197	-0.361188045	0.090726649	1.234355738	-0.298856735	0.207140075	-0.58044536	0.543668038	0.074786942	-0.613232566	0.13606601	0.312241311	0.047039892
10.38162958	-7.298233442	-7.068765528	3.557212875	-1.963284782	-2.508890863	0.766725739	-1.303149583	0.742925927	-2.154899163	1.46822327	3.832137196	-1.543004479	-0.755535271	0.723045811	-2.362156834	0.239054169	-0.309115634	0.489002919	-0.594701346	0.810738002	0.742758203	1.373959879	-0.264492392	0.816349914	-1.357340105	-1.303183235	-0.921648136	0.202467887	0.037253634	0.67992108	0.604762906	-0.501032719	-0.372145398	0.256747022	0.514195631	-0.181021317	0.412510319	1.011861069	-1.005272227
-1.3709703	1.072098427	6.120337518	1.706138374	4.015018142	4.029694798	1.004136915	-0.767721535	2.55727237	-0.749807798	-1.569662575	1.894269574	1.688204279	1.563951758	1.525589436	-0.902476392	-0.917133969	1.069899665	0.103898623	-0.836538202	-0.138697757	-0.552529172	0.632788051	-0.351198085	-0.304297878	1.142748809	0.74072683	-0.340676317	0.344850907	-0.640709627	-0.502681759	-0.127367377	-0.323322099	-0.393002219	0.576225727	-0.187087006	0.336415305	0.152787291	0.09448552	-0.169752979
-1.162089181	7.591240816	-0.856860548	-3.227987767	4.634287574	1.563284275	-0.224914476	1.480547264	0.922225833	-0.68159386	-0.687913236	1.309625549	1.177298218	-0.946167038	-0.867146032	1.624402649	1.609368865	0.920619631	-1.082326948	-0.87979026	0.856583221	0.483431677	1.22735144	0.383691505	-0.101727869	0.094845987	-0.033558912	0.423769181	0.352894827	-0.638039491	0.049484847	-0.827704535	0.680325735	-0.113201838	0.17848031	0.062983097	-0.343807935	-0.248107692	0.070152207	-0.0001803
6.082777183	3.484447011	0.431650971	-4.380085242	0.736640176	0.727297357	0.340192446	0.666305144	1.735610271	1.073312055	0.274378992	-0.905169334	-1.065291727	0.759175528	-0.644410235	-0.213020252	-0.828980692	-0.281907886	0.177251179	-0.413134184	0.790290295	-0.837146266	-1.204833383	-0.007664313	-0.572219846	-0.480039882	-0.047308077	0.960601553	-0.636551186	0.246682523	0.29779228	-0.063065203	0.517729128	-0.17559855	0.527081642	0.612831241	-0.279431864	0.035957222	0.178999716	0.558486211
6.893123378	-2.764961757	1.058907075	-4.296819058	1.738755032	1.647886984	-1.732598621	2.67366173	-0.191673757	0.166980329	-1.619218059	-0.492114412	0.322760695	-0.788009876	-0.482765865	1.327719056	0.615738452	0.526650716	0.569473442	0.619116605	1.442439331	1.269084854	-0.713740395	0.271308206	-1.329405192	-0.604873836	0.148272722	-0.275840813	-0.275146386	0.866743871	-0.28646023	-0.925718342	-0.285506904	-4.94E-05	0.111513449	-0.048429395	-0.154629077	0.436748873	0.346268732	0.049285771
10.12097804	8.008996445	2.573289876	-2.205372871	-0.616177255	0.620580252	-0.809253942	0.059870436	-1.40135551	-1.577076517	-0.177999939	-0.127913417	-0.458826932	1.245556497	0.183591286	-0.408193158	-0.069091204	1.418235925	1.490545867	0.014749408	0.71859718	1.202397001	1.47080619	-0.154083758	-1.182581943	-0.203035801	1.171139889	0.573315669	-0.084989902	0.786073809	-0.040094623	-0.824565207	0.395828353	-0.517016373	0.085504651	-0.053321805	-0.332419594	-0.306522252	-0.737590157	-0.128454032
3.400049054	9.997099472	4.472905825	3.286265314	2.629382315	1.725657515	0.525292742	-1.096019434	3.906347684	-0.172729745	0.478428794	3.089256967	0.995409037	0.120543226	0.340281309	0.123559798	-0.962689254	1.301805761	1.144766871	-0.183022978	0.952822595	-0.37827624	-0.257282753	0.475120689	0.704419647	-0.630528686	1.388334873	0.570893827	0.098141086	0.391354484	-0.546721812	1.400105658	0.399505	-0.447000339	-0.481451843	0.132159301	0.269719552	0.613023776	-0.614386749	-0.20541713
17.94567464	1.942784742	-2.04214228	1.507976866	-0.349898332	-2.856215888	-3.494704934	-0.319437525	1.129719035	2.916426143	0.060161363	3.068189919	1.366343015	-1.328345036	0.092558305	-0.935486848	-1.331481637	0.254648774	0.61342184	0.996768351	0.791791344	-0.503238024	0.432914638	-0.1300019	-0.092415735	-1.101541687	0.213092206	0.263895752	0.574607987	-0.387672771	-0.435347939	1.269393327	0.089628301	0.081093551	0.43618367	0.746932811	0.542466433	0.192116985	-0.507141139	1.086989015
16.56373451	7.727791923	0.636385616	0.306259807	-2.730084229	2.624093598	-0.011874536	0.849262843	-1.676159274	-1.318036629	-2.229089922	1.685589048	0.716921175	1.064653207	1.55927309	0.07686649	-2.099324528	-1.370309147	-1.464685468	-0.268235823	0.903481795	-1.252394445	-0.696674091	0.718205703	-0.09855202	-0.844860253	-0.502824301	-0.32815272	0.512020687	0.016824867	0.06832115	0.178741148	-1.109928575	-0.05069657	-0.853420234	0.05793113	-0.504011728	-0.312219904	0.164002777	-0.026956743
12.3352915	-6.75472515	3.957634242	-2.645028847	1.431767271	-1.531765096	-1.423444355	2.883471084	1.483252638	-0.441389756	1.397190335	0.890067394	-0.174517071	0.373362203	0.219640498	0.690868824	-0.151140624	-0.06055763	1.288379949	-0.241284776	-0.207047969	-0.244185995	0.023742002	0.741518898	0.871957906	0.538277723	0.252120723	-0.49106994	-1.160806923	0.889252896	-0.202903298	0.103280349	0.003122923	0.533372047	-0.421867624	-0.084344084	0.041594435	-0.155888496	-0.191586241	0.33799866
10.91241886	-4.969280866	1.003759756	-2.51135055	1.452984329	3.500341985	-0.594136413	3.228825489	-2.255546985	-0.479466993	0.760527661	0.998810251	-1.105757789	0.615940436	1.554554076	0.947334659	0.563524795	0.076818776	-0.303547561	-0.792642613	-0.307394	0.127538262	1.219995109	0.540126794	0.176965727	0.393127149	-1.016057747	-1.197680693	0.737077234	0.965719272	-0.257087549	-0.180806414	-0.140859496	-0.337869098	-0.723622016	-0.419478988	-0.152267998	-0.014312826	-0.153626168	0.13779164
8.095072337	-4.241692102	1.492232407	1.943979488	-0.519298262	-1.883002123	-2.88304987	0.032325428	1.004182435	-0.351616382	0.895078147	1.221398046	0.050494752	-0.025259498	1.57361486	0.775958266	2.245949252	0.550098464	1.10816554	0.207451195	-0.281368773	-0.37803248	-0.059685442	0.19265385	-0.935938293	2.132198698	1.561504238	0.361227238	0.016918019	-0.158923429	0.158189499	0.177702712	-0.053332689	-0.416343826	-0.152544144	-0.091676184	-0.493764359	-0.248117222	-0.374752871	0.173025004
4.271084709	3.843597657	5.13797	3.662350965	1.901984894	0.018694238	-4.247634479	0.358165575	2.536029096	0.505372585	-2.3679598	-0.48135383	-1.318308526	0.111342691	1.244288565	-0.644789013	0.736069455	0.028050376	0.317292125	1.152653273	0.29880288	0.593914248	0.369092843	-0.261286972	0.102473781	0.058924621	-0.199805292	-0.017109784	0.766770836	0.165790968	0.643235544	0.294936439	0.138209446	0.521461666	0.222440788	0.447156424	0.325073522	0.245838326	0.057026133	0.051344146
2.297645182	-6.795536486	3.587478836	-1.213170941	1.733889364	2.23738086	0.810360524	-1.501328883	1.975669253	1.311294308	-0.38207507	-0.065434723	0.757703825	-0.549608503	1.209437242	0.780362114	0.324563423	0.517549213	0.234593064	0.96858005	1.394862235	-0.103407055	0.370464265	-0.068218503	0.259728089	-0.035098359	0.432309321	-0.236792373	-0.069513453	0.25103033	-0.051480196	0.191074878	0.209586486	0.029018222	-0.115636979	-0.070536167	-0.038102461	-0.294654599	0.099453441	0.398647473
15.06931335	5.10701651	-3.609588747	-0.538096857	0.500948231	-2.188970012	-2.473010656	0.86437296	1.088891136	1.42314357	-0.590051347	0.497333978	0.25651578	-2.713802821	0.891304581	-0.711214441	-0.876673913	-0.054952184	0.219927261	-0.358689873	0.885566505	-0.670134037	-1.554825989	-0.436031202	-0.691286588	0.341202097	0.926902997	0.158546991	-0.45443996	-0.035383273	-0.424030006	-0.935043062	0.045049948	0.386860619	-0.623301229	0.116520039	0.385980785	-0.918659686	0.520893993	0.615416162
10.06530439	1.582858551	0.000656606	-2.837608467	-0.335237894	-1.221271352	2.185044366	0.495313831	2.13832657	2.072078959	-0.519416325	-0.044008131	1.195543264	-0.86402055	0.007194103	1.863023936	1.709712866	-1.756772159	-0.177557343	-0.039849183	-0.851732555	-0.367437543	-0.335909948	0.885135136	-0.075910641	-0.575700018	-0.616649485	0.1502465	0.295081651	-0.753136248	0.108678196	-0.397460532	0.840469599	-0.154645437	-0.177150718	0.325875715	0.504873211	0.243660977	-0.221993304	-0.111616131
16.90533235	-5.363973844	3.689538738	-4.905634615	4.28396919	4.276190958	0.239026657	-0.042523039	3.731402496	-1.450454901	0.963800219	-0.096272853	-2.321290859	-1.305481251	-1.41424634	0.704460428	0.302601839	-0.583607144	-0.036547532	-0.204812594	0.093375641	0.438096114	0.39071925	0.46186195	0.697370095	-0.67173318	0.767356811	1.268753743	0.681027028	0.298190634	1.070418484	0.793209823	-0.254838759	-0.584980145	0.080715783	0.615237043	0.608591616	-0.551175159	-0.273817776	-0.359841468
12.00905392	1.420398762	1.531423315	-5.183089951	1.042078178	2.732882454	-1.325716976	0.633372709	2.428487123	-2.462026454	-1.236381064	0.230564497	-0.722654	-0.432829268	1.958754411	-1.510619282	1.81399176	-0.961091908	2.98124617	-0.204031764	-0.487048323	-0.395713358	1.445725021	0.613587651	-0.141677462	-2.071926081	-0.247980807	1.385915164	0.165871054	0.451236225	1.104386866	0.503406482	0.531313679	0.263138315	0.7095666	-0.368906068	-0.445078112	-0.177982122	-0.028270906	0.134497446
2.425029405	25.85639661	-9.02921881	-0.004744045	6.802795259	4.631875198	-1.057524066	0.798883564	1.918440232	-3.036939222	1.574924946	0.511932736	2.228794193	0.275247623	2.017293015	-0.240018506	-0.162977263	-1.41543315	1.676387644	0.961160813	0.722877944	-0.185324254	1.643286399	0.900372313	0.935550217	-1.588117303	0.590282646	0.756078826	-0.703019363	-0.01224652	0.617259229	-0.084643563	-0.611729671	0.289387316	0.612823065	-1.096619089	-0.780858921	-0.325274518	-0.404830949	0.056950361
10.7851978	2.657634104	-3.421523145	3.266893249	5.231336187	-1.701101276	-5.301209081	1.133687569	5.015294453	1.612412336	-0.995013145	1.305943044	1.4412518	-0.095818617	0.832171378	0.15367095	-0.103924854	1.190834434	1.260763413	0.382616406	1.956591099	-0.198981346	-1.535184932	-1.964676645	0.660791575	-1.449187977	1.45584449	-0.062457751	-1.15866744	-0.186435217	1.114681024	0.610201895	-0.15062439	0.748790914	-0.344110496	0.115276788	0.502961997	0.570404477	0.234695291	0.115743574
10.76873915	-4.229942291	-1.687508045	-0.600706002	2.831976457	3.31723872	-0.665008746	-1.315907827	1.419366794	0.962151857	-0.189863704	0.129332655	0.007685018	1.126021319	2.104967904	-1.879568991	-0.004655391	-0.024316739	1.252153799	-0.514819498	0.609496538	0.284773925	0.708567929	-1.377567024	-0.278839806	1.157838274	-0.351590366	0.143071932	0.209905367	-0.228969596	0.553424784	0.058081865	-0.318892967	0.18885263	0.183377836	0.206343359	-1.070472738	0.271667859	-0.015214485	-0.885979914
16.18771545	-3.464616466	1.804122147	2.694694197	2.419164433	0.683976754	1.391039815	-3.263857992	1.969604423	1.518885131	1.661618526	0.100935375	0.395723225	1.117962108	1.606356194	-0.948116968	-0.427131423	0.950054747	-0.084927167	-0.978021804	-0.117037775	-0.211939502	-0.459743212	-0.529806369	-0.480759266	0.830712394	0.916194687	-0.877114469	-0.617460617	-0.53980219	0.681427663	0.403999442	0.313512256	0.021123131	-0.530441931	0.41867346	-1.214881275	0.490790776	0.596159508	-0.40807099
4.629929787	0.90383096	7.212555089	-3.513034157	2.84424421	2.394908455	-4.722228661	1.315938467	1.198402724	-1.131861584	0.613719526	0.750982361	-0.307257614	0.240433381	-0.021659667	0.414309226	0.111619606	-0.320794845	1.135610224	0.596808855	0.497748021	-0.775189686	0.615551106	-0.323574695	-1.066642795	-1.865453465	-0.120065179	0.191130162	-0.128602617	-0.872358796	-0.44250311	-0.880366586	0.588820516	-0.186415877	-0.098692497	-0.334962904	0.101030165	0.008098334	0.131283216	0.299069928
9.022710869	1.972531306	6.900294305	-2.628075615	0.092255247	-0.031760925	-2.957535081	1.662899088	2.354944672	0.460002731	1.69256488	0.019167676	0.166829931	1.589750407	0.218183237	0.170476865	0.176404608	-0.954393904	0.595865664	1.022550039	0.250320863	0.654688184	-0.142890274	-1.573577676	-1.407931239	-1.485881729	0.239654683	0.17967676	0.18727977	-0.271954326	0.540840923	-0.703108604	-0.499192487	-0.275058685	0.176822308	-0.133781698	0.16662497	0.522577194	0.016761918	0.057180743
5.542489304	32.833135	-2.07489888	6.453147328	2.87154014	7.360118321	1.450261233	1.594481056	-4.630815008	-3.690779412	5.480106986	-0.492809114	-0.349579602	1.845433365	-1.189755836	0.903785887	-1.052765613	-1.320041636	0.367619749	0.026937503	-0.155370425	-1.985900172	-0.21176919	-0.978919246	1.335313195	0.055256692	0.710158325	-0.307425423	-0.844286435	-0.101175691	-0.562604417	-1.44884397	0.072915124	-0.796240393	-0.506241729	-0.090014904	0.252990196	0.376718543	0.205204634	-0.0518926
8.065600428	12.22709264	0.854102162	1.50790727	-0.059989018	2.892920155	0.125444012	-0.304577849	2.034092608	0.230616157	-1.767487354	-1.012543701	1.330779203	1.152590607	0.692921041	-1.3038417	-0.909423926	-0.32502539	1.007951245	1.868377525	1.052995249	-0.887058123	0.619337843	0.603696061	0.078704165	-0.937360317	0.265595314	-0.502348889	0.233579323	1.030568988	-0.32371158	0.929282081	-0.370745912	0.246626974	-0.344865437	0.381885641	-0.347655647	-0.470844853	-0.142046047	-0.14475954
20.46322761	-6.003591424	-2.278583169	-2.579621867	1.975742937	2.985752561	1.832134438	-1.069532953	1.939700789	-1.246544681	0.816550948	1.029938413	0.202768588	1.416453075	-0.724358017	-0.558290683	-0.403530422	0.674617405	1.045816133	0.249937468	-0.152061176	-0.342519573	1.929570451	0.602451777	0.437203357	0.872220912	-1.198540198	0.052047207	0.016142877	-0.086324974	0.47370879	1.175771491	-0.46385205	0.302672816	-0.606311492	-0.056420563	0.479241616	-0.610324091	-0.2357266	-0.663266791
8.139981209	-2.089712796	-1.706054484	-4.540887349	-0.55693581	2.809204863	-0.866229717	1.096565912	0.396385349	-0.324751791	0.368532749	0.151640704	1.853448419	-0.30202904	1.652299403	0.215745999	0.967928069	-1.742004151	-0.582120269	-1.902070981	-0.894250171	0.40806819	0.85583675	0.16040305	0.162257552	-1.149789836	-1.456462375	0.684908889	0.645486264	-0.807769797	-0.367032052	-0.557097321	-0.538614888	-0.202592497	-0.810029779	-0.368047554	-0.103342379	-0.099137455	-0.427070782	0.301073728
19.69665669	-1.402740582	-1.122075738	8.082526712	4.671650787	-1.492500994	-4.937961935	2.170150821	2.12948731	1.534241682	1.396109839	-0.87202584	-2.224682213	2.208061273	-0.846070748	-1.180735876	0.067862289	-1.063568125	0.08154796	-0.50937746	-0.337260408	-0.20939495	-0.60077635	1.121847185	-0.738454476	-1.279099535	0.957081935	-0.539793154	-0.8722902	-0.328526986	-0.391971193	-0.762952501	-0.610227572	-0.228461831	0.560346572	0.992008731	-0.543421235	-0.02081723	0.240986591	0.054846794
8.048942803	0.558489795	-1.259889043	-4.908556579	-0.365495638	0.167523574	-1.490297032	-1.082909901	1.539442576	-0.138414671	0.162769071	1.536455161	-0.481979968	1.165646429	-0.382102566	-2.012906797	-0.653080573	0.06519712	-0.661832507	0.114175691	-0.414750927	-0.707241725	0.794618757	-0.824405969	0.710091942	-0.620574495	-0.748215955	0.347947755	-0.13546632	0.265144597	-0.647559475	-0.936921865	-0.163753187	0.282619098	-0.025001681	0.502015695	0.031814418	0.183887734	-0.160052212	0.490532563
0.589003417	9.438681367	0.150437272	-4.419402804	-1.632903779	2.848792833	0.631358991	-2.393412122	1.442307501	-0.138158377	1.100927119	0.209058948	-1.09071357	0.818660843	0.269096453	-0.513088893	-0.492610641	0.71677971	-0.352732521	0.084895786	0.207066625	-1.46673637	0.678936916	-0.822131082	1.395791551	1.296041384	-0.141936416	-0.033402406	0.397646336	-0.075271005	-0.189330615	-0.520049326	0.344605425	0.154805425	-0.108691925	0.453082645	-0.089774492	-0.200609946	-0.189879156	0.915888418
4.214759524	-6.443696942	1.294676756	-2.414792093	1.958338996	3.72142391	-0.092064926	0.132605684	1.294747256	0.878062162	0.347353779	-1.027783844	-0.344383373	2.876092894	2.483087069	-1.071123384	0.860995332	0.839546474	-0.189391635	0.288614002	0.192212154	-0.028805651	0.533081189	-0.122116836	0.523471203	-0.735849066	0.187159013	-0.732660645	0.346072854	0.120977811	-0.495818865	-0.7225097	0.661042324	0.054250723	-0.220120138	0.558178442	0.267916527	0.06137278	-0.224588998	0.427263354
7.739620761	-3.9121903	2.335423185	-0.642184827	3.424663568	1.465076973	-1.616870779	-2.757911693	-0.87669478	-0.302106386	-1.073061472	0.786668944	1.905748254	0.32895649	0.545274559	-0.777042064	1.662283161	0.839710464	-0.569832862	0.126953215	-0.06694317	-0.120796982	-0.299390909	0.279807076	-0.496910526	-0.378059635	-0.653546996	-0.289297256	-0.442865651	0.715120675	0.024994331	-0.118294479	-0.3003344	0.290883486	-0.18184673	-0.540321455	-0.712225781	-0.14677027	0.287629668	-0.639584909
11.31406603	-4.787112566	5.655540195	-1.467312051	1.003799952	-2.482427071	-4.538854692	-2.264985229	2.732437407	0.016871778	0.855361016	0.556244051	-0.655435973	0.496871311	-1.308360233	-0.257125389	0.044169152	0.630587184	-0.304127769	2.292489742	0.480145318	-1.242783213	-0.694556597	-0.480741577	-0.170640102	-0.298249586	-0.348778312	-1.060275212	-1.537179716	0.549359269	0.030236016	-0.544085454	0.002419682	0.376281713	0.522973013	-0.420535569	-0.336084592	0.431460178	0.325142353	-0.380416714
-5.782348175	-9.277488956	1.722149659	-1.868117083	-0.089858243	-0.340730977	0.480220158	-5.362837291	1.245200727	0.330780167	0.763375274	0.322369254	2.592950292	0.068902854	1.193016132	-0.464266152	-0.13338587	-1.477140686	0.349657981	1.000002998	0.132893962	-0.165355938	-0.977055965	0.56138256	-0.018459546	-0.931813384	-0.451257874	0.057681617	-0.580500576	-0.047333199	0.161253961	-0.082495008	-0.038553705	0.337013308	0.346517648	0.099505179	-0.125492588	-0.035428533	-0.02874843	0.133508499
4.579852452	2.102973221	-0.483120279	-3.487265371	3.975012237	3.833512003	-1.242686311	1.615861497	4.434300759	1.027078354	-0.589442161	0.977986303	-0.433661566	0.141291071	1.830890594	-0.581522578	1.36947265	-0.955810644	-0.276550477	0.705440379	-0.829794195	-0.115670342	1.261627862	0.102605843	0.532503833	0.050740045	-0.436627473	1.707453284	0.808363511	0.466681955	-0.747020879	0.498626471	-0.127783091	-0.873058404	-0.122760445	0.459539093	-0.015406989	-0.041833139	-0.008682607	-0.104268004
24.07667858	-2.99032289	-4.758187139	-4.8234857	-1.778731329	1.187742118	-1.72694078	-2.455259808	-0.438396987	1.349240183	0.240171988	0.161083507	1.598702382	0.154164964	1.106754774	-0.799580003	-0.107244426	-1.028368056	0.741473812	-1.348347287	-0.266050028	-0.590652034	0.777894987	1.784504357	0.264094217	-0.671226642	-0.074652222	-0.167498977	0.29088669	-0.515219332	0.283010706	-0.48889814	-0.280943871	-0.063087671	-0.24527075	0.030974563	-0.090607083	0.464008739	-0.036002789	-0.332930463
5.119602613	11.61391078	-0.384842007	-0.955572746	1.182116884	1.337595089	-3.334119629	-1.703571616	3.288484929	2.661636594	-1.100641428	0.194722803	1.540107775	0.601920572	1.524979283	-2.017046913	-1.384625899	-0.39086876	0.335980703	0.564814244	-0.167608522	0.04155438	0.983943483	1.091624489	-0.140707783	-0.393817999	0.129625338	-0.050161992	0.151176216	0.5650096	-0.059869694	-0.164657772	-0.462711269	-0.411618981	-0.295956313	0.23790616	-0.329612747	-0.690939223	0.407470002	-0.625476722
13.2558305	-1.634760554	-0.11400173	-3.157956679	0.464742697	2.100328676	-2.491211795	-2.278418779	0.796043649	-1.061631641	-1.720309694	1.858460428	1.772128194	0.526556352	2.461277645	0.877374881	-1.869929821	-0.035254534	1.755579364	-0.455632932	0.717953082	-0.222713137	-1.408119647	0.323906278	1.16668075	0.470055159	0.376612008	0.895757317	0.680330293	-0.267409591	0.671918025	-0.099772352	-0.184450873	0.337277477	0.285980936	-0.376515339	-0.218465683	0.244905211	-0.40865916	0.072268711
15.81665644	-2.918037342	1.182518064	3.660382442	3.878740439	2.236377179	-1.560354952	-2.972448428	1.275108924	0.7614304	-0.585804663	-0.344571658	0.467708083	0.054078077	1.039564075	-1.337991902	-0.221801642	-0.581946244	-0.753508231	-0.389330457	-0.635689441	-1.202070233	-0.323510445	-0.412429346	-0.573474891	-0.164924085	0.085682609	0.885357244	1.124437434	0.507903551	-0.49535484	-0.147061718	-0.323146894	0.095669814	-0.933514692	0.151553001	-0.391481352	0.316800966	0.240787638	0.125017372
8.390807152	-0.535787098	-6.945610813	4.928991659	2.159017862	0.831555635	0.754749331	0.626106833	0.566779849	-2.520704576	-0.324916396	1.674488068	1.947379134	-0.390361262	0.720028969	-0.075561351	-2.40612393	0.513502541	0.473064758	2.501247715	0.400652725	-1.185505493	-0.944581199	0.207825233	0.647153346	0.409379457	-0.206860457	0.452158165	0.439342824	-0.523996147	0.30710191	0.299577802	-0.20034067	-0.664346417	-0.247856913	0.117047899	-0.26675322	0.830451629	-0.127416069	-0.577916676
6.058195348	13.019224	3.216679301	2.235853789	-1.673035531	-0.761787601	0.894148484	4.099544252	2.38682715	-0.343206743	-1.167566087	1.984298153	1.017009917	1.381155631	-0.423170002	-1.547563472	-0.177548298	1.027790737	-1.283702706	-0.753345109	1.108174288	0.305334982	0.238623806	0.24752567	-0.50894402	-0.659584046	0.048738122	-0.806607439	-0.222108603	0.523965708	-0.092069821	-0.173896889	-0.021071518	-0.585167535	-0.517478812	0.054125983	0.01316173	0.016955148	-0.353786675	-0.209057093
9.429995888	6.468446147	4.384854791	0.85798358	1.832759424	5.340276455	-0.790556844	1.65793647	2.057292429	-0.80620232	-0.931101156	1.023919645	0.916138039	1.060188205	-0.841102382	-0.955037256	-2.973258966	0.004191986	-1.730214209	0.320959239	-0.349948928	-0.936235931	1.010449874	-0.034241428	-0.053832727	-0.411245038	-0.155939183	-0.625834337	-0.159411647	-0.37181347	0.2075838	1.410753158	0.43878234	-0.479041329	-0.645911916	0.251857289	-0.280690771	0.621035223	-0.389322409	0.013761363
11.06297578	4.074207675	4.227482988	5.832293325	-0.608366473	-0.14126868	2.045108946	2.72974659	-0.048740594	1.258207463	1.721631426	2.196422731	0.814525008	1.591485765	0.758379944	-0.796912622	-1.09681658	-0.095284029	-0.694291985	-0.083588054	1.81776067	-0.205959417	0.844503388	1.51531469	-0.680127841	-0.358093772	-0.439631835	-2.133851858	-0.323478798	-0.137040071	-0.12924914	0.101221201	0.899023263	-0.040165387	-0.398752315	0.915348489	-0.198040081	0.320177968	-0.33505284	-0.266946754
7.237463914	-1.310547542	-6.217524016	-5.458208958	0.533303306	2.66973161	0.591901216	-0.938766816	2.308264976	1.320689615	3.182879898	-0.15156681	-0.867885719	-0.04694705	0.489476864	-0.80081796	-1.807157226	-0.424148826	-0.260941826	1.887271363	1.419170349	0.023763903	2.072721163	0.208766402	-0.898750349	0.732178904	-1.106878336	-1.072863229	0.611619498	0.697584542	0.285729757	-0.751323776	-0.023783806	-0.154074592	-0.293909236	0.066909279	-0.149257994	0.632691212	0.337749899	-0.460577466
9.47841772	2.376294079	-5.467831949	-1.39496965	-2.453891024	-0.053864196	-0.251494755	1.658998689	-1.476437062	-1.613966615	-3.101290093	2.353384333	0.925126705	-0.967771054	0.495391717	0.046996716	-1.048301068	1.252790756	-0.423171779	1.742118459	-1.237582141	2.196277754	0.488841902	-0.682723205	-0.694143311	-0.001317061	-1.937903306	-0.096280758	-0.658676049	0.998798248	-0.099543536	0.0603119	-0.467267773	0.506158115	0.066723322	0.008244324	-0.707814212	-0.066154347	0.001803296	0.808800563
2.887258439	2.331392788	5.697426009	-1.018183348	-0.720179713	0.426636474	-3.938206034	1.11334365	0.619516806	-2.317876874	0.15312435	1.673394004	0.092569747	-1.519148914	0.922606946	-0.291901344	-1.686034989	0.858740533	-0.678756819	-1.002080102	-0.691711704	0.041593301	1.387555619	0.846280908	0.09111715	0.233866842	-0.459188991	-1.005854657	0.97568028	0.02752801	-0.855390126	0.113903902	0.062849098	0.32295401	-0.171162094	-0.110171927	0.262624833	-0.46200555	-0.033013416	0.199132421
1.000128347	4.682128484	5.048318506	2.54540115	3.383690432	-2.218273407	-2.537327361	-2.118418916	0.636958738	-0.303626396	0.412222003	2.454263749	-1.094524821	1.407108675	0.857760053	-1.700953217	-0.993669235	2.123956894	-0.357100934	-0.058803894	-0.134253679	-1.02237248	0.108424177	-0.601044028	-0.611543578	-0.632102548	-0.607161542	-0.534440205	0.157662059	0.110549425	-0.058903447	0.030807072	0.172141611	0.382495461	-0.004986152	0.316958503	0.564676546	-0.450852258	0.235987108	-0.367071154
12.83443454	6.074641809	-2.197959732	1.512828348	-0.710725271	2.019657324	-1.969366992	-2.087519895	-1.894231965	-1.149779844	1.370748065	-0.791535095	3.62918804	1.761467263	0.915522477	2.046019706	-1.254179964	-1.385289009	0.009459024	0.083699165	0.480457994	-0.466340088	0.489806931	0.303065645	1.068883523	0.061633458	-0.721970037	0.295652213	0.499741489	0.166017164	0.741293968	-0.208250091	0.024182796	0.257354647	-0.135171393	-0.24178549	-0.718978842	0.574001462	-0.360984392	-0.336270395
9.411905126	2.868581761	1.508647645	0.040822199	2.585019744	1.890730292	-6.186677272	-3.543158825	3.865685097	-1.045873424	-2.542205648	0.06457216	0.125921349	-1.528361002	-1.439957383	0.664377989	0.10138783	1.411641317	1.088404299	0.12061073	1.305767018	0.177830558	-0.597203124	-0.2963155	0.345730357	-0.775058666	-0.084133498	0.871958595	0.531367006	-0.093046182	-0.103742171	-0.280920428	0.046263595	-0.093140696	0.382446601	-0.166549989	-0.157722693	0.443863529	-0.026750568	-0.485833017
6.245134285	5.72011137	-0.46784906	-0.912507299	0.458396033	0.790017621	0.555013549	-1.001955435	2.352853258	0.009046812	-0.644713786	0.998029178	1.124242754	0.799759027	-0.128479298	0.582843479	-0.621416967	1.541828507	2.037818465	1.269835377	0.185029256	-0.224751579	-0.048593635	0.160050769	0.406866476	0.281767852	0.001298486	0.705620641	0.501269563	-0.09455706	0.381288839	-0.978866032	0.136496099	-0.176086836	0.395887971	0.398434436	0.120342136	-0.425887395	-0.101508392	0.028695767
-1.481423364	8.802409027	-12.91485266	-2.769561808	-1.942046596	4.485935056	2.18287433	0.809653217	4.16040865	1.514971296	1.920262715	0.06040423	-0.763426062	0.805419216	-0.088221528	-0.798370045	-1.499939393	1.247247808	1.172100412	0.965037644	1.53307973	-0.963320969	0.76363655	-0.236273137	1.029740249	-0.102551129	0.318296991	0.081979976	1.045590502	0.190007007	-0.297369803	-0.79633746	-0.624992299	-0.339151893	-0.133797467	0.055871729	-0.361457161	0.151769418	0.076524653	0.367609365
0.467647591	2.825476202	-9.26657624	7.885719677	-4.021171169	-0.500263781	-1.473689487	-1.427382846	-0.375712867	3.034517296	-2.80585085	0.065365728	0.457923266	0.661876697	-1.161956884	1.117768579	-0.138757831	0.377125313	1.514921577	0.125678564	0.211461147	0.776049804	1.7032253	0.431326706	0.892927207	-0.713985594	-0.345977936	-0.609230206	-0.266930167	1.047977995	-0.373037773	-0.792298723	0.472706746	0.399162261	0.67215959	-0.315535951	-0.486273057	0.314723286	-0.114454028	0.281390542
3.599323439	6.788159637	1.774770539	-2.344584785	-0.185224611	0.791912799	0.285006321	-1.183014951	0.575211539	-0.516228313	-1.438527931	1.233599633	-0.853824486	2.235895783	0.618530813	-0.759990406	2.25121485	1.238699077	1.499524464	0.183156509	1.356099346	-1.525700107	-0.49196564	-1.663446377	-0.111305862	-0.231081091	-0.887326245	-0.451595771	0.547510973	0.220177537	0.073051244	0.274844393	0.13413608	-0.085560588	-0.436394223	0.332332144	0.636862364	0.204291617	-0.243034289	-0.122275178
2.737032448	1.901339683	1.258212985	-2.149862546	2.245157161	3.88681579	-1.680058784	2.57516251	2.098770085	-1.467309779	0.768207968	-0.140938639	-0.502822055	0.472687598	-1.160208709	0.404952516	-1.512402874	0.31026308	-0.568612887	1.350573696	0.124899504	-0.45124404	-0.875525233	2.153021947	-0.596199841	-0.498058192	-1.055723803	0.844902112	1.014756453	-0.474939791	0.230617185	-0.234805666	-0.140798581	-0.377455588	-0.524912576	0.650664833	0.524054281	0.170766925	0.252569725	-0.282307175
14.36682075	-17.11919357	0.360557592	4.305448464	3.312893343	0.816950797	2.415564328	4.509603935	5.904229247	-1.056489623	-0.201471648	-1.431138314	-0.178802434	0.89215266	-1.422223031	0.077429149	-1.024533272	-0.232196654	-0.758432668	0.575227739	-0.801101508	0.828635284	-0.621672349	-0.119870227	0.923106015	-0.559524107	-1.10072931	-0.457079931	-0.077753449	0.571875221	1.283296627	0.358094394	0.029611384	0.434310012	-0.730036164	0.692903904	0.314817487	0.284648495	-0.049380928	-0.863042669
11.01382634	1.517997626	-2.47309884	-0.092923465	4.331172798	5.392954395	-0.690599241	0.781326591	2.573788985	0.631050914	-2.940417678	-0.394540506	0.311772097	1.002570892	-2.229843515	0.424968104	-1.583512293	-1.26928449	-0.784936826	-0.713478552	-0.187831753	-0.346143535	-1.080147661	0.535784124	0.929911271	-0.011833219	-1.786220628	0.093027316	0.647154729	1.163901038	0.17436957	0.195923846	0.752388679	-0.09064676	-0.224858401	0.708562788	-0.19624564	-0.121918249	0.058556146	-0.311379868
11.38263323	-1.175698792	1.287439556	-2.773661342	-3.258842636	2.397852089	3.248839626	7.221323711	-0.752096701	-2.429273072	-0.605143012	0.479546786	-1.18686086	-0.594386122	1.724139169	1.238666482	0.307700732	-0.430632563	-0.197236069	1.237427773	-0.969585318	0.026153747	-0.733195731	-0.486897676	0.375151854	0.27248666	-0.514439671	0.271686851	0.238662364	0.355760539	-0.907072816	0.476750066	-0.116969751	0.284154139	-0.203001973	0.765257316	0.417885035	0.112930054	0.387820303	-0.075916921
18.13656924	2.807579698	-4.102152783	-2.468583726	0.765206893	-2.117827404	-1.750519534	2.179570601	0.384263992	0.334348614	1.038110212	-0.509002256	-2.442849732	0.958553335	1.348215801	0.254130252	-1.806485779	1.48030041	-1.411266719	1.895105906	0.666088011	-0.656247549	-0.41205957	-0.058802086	-0.203592661	0.828732601	0.7160204	0.009573277	0.138477003	-0.222820988	-0.585968839	-0.533702394	-0.248887313	-0.714041426	0.12807564	0.012588105	-0.486525189	0.386776744	0.036506918	-0.056371081
13.01258904	12.47416522	-5.438981457	7.225083258	3.362490672	0.48170697	-0.041961722	-1.375288685	1.725100471	-0.022196614	0.204133092	1.486590305	-1.81118641	0.037053967	1.659090279	-0.954892708	1.113983293	-1.801146249	1.321505101	-1.153846368	0.910609422	-0.406261568	1.447340054	-0.032422161	-0.450958689	1.668062489	-0.989918169	-0.89012097	-0.419110488	0.032493671	-0.551954586	-0.397462332	-0.252308346	-0.180221188	0.155283694	-0.337079194	-0.558976037	0.322737121	0.09123031	-0.206170406
-0.103869963	3.136491194	-2.842194815	-2.176681312	0.165073673	2.449548051	-0.048669853	0.135222357	3.70081799	-0.203697172	0.219866037	0.508400533	-1.216774423	-1.343373855	1.806530717	0.57783019	-0.785023361	-0.586045086	1.16484023	0.515053569	-0.094557047	0.190693569	0.618219358	-0.311226613	-1.600777541	-0.879409555	-0.300962923	-0.328165805	0.516256677	0.276859172	-0.719572415	-0.270985264	-0.419400575	-0.361870602	0.122071799	0.264495653	0.273838469	0.116315767	0.076251777	-0.007231073
6.553456049	8.037621553	3.55262862	-3.994073211	4.690783406	2.493219769	1.478363445	0.618604966	0.394953664	-0.218879624	-1.018005916	-0.1409088	-0.563511291	0.695509832	1.414408823	-1.050371085	-0.132664433	1.10127077	-0.788311477	0.463935624	0.183001539	-1.184634352	-0.358933538	-0.889843145	-0.449915964	-0.354662785	0.497487609	-0.036444316	-0.846511631	-0.07215144	-0.054015537	-0.041680322	0.464710826	0.040598915	-0.144548806	-0.012061122	0.482767373	0.476200862	0.180517173	0.207128683
16.0416591	11.6381852	0.046297194	3.017870796	-1.734083925	0.96734882	-2.931494741	1.570474605	4.651992516	0.686083541	-1.524787574	-0.723931994	-3.510848705	1.537977504	0.956199489	-1.362273003	-0.301185805	0.583050558	-0.854422094	-0.220646777	1.501932054	-0.892088758	0.158693167	0.741570237	-0.112203311	-1.255043197	-1.532590715	-0.96835238	0.224071267	0.824921531	-0.229451127	-0.083254394	0.684386219	0.094699054	0.446857547	-0.190518615	0.203384306	0.230048613	0.173648201	-0.168029124
11.41285711	11.14883925	-2.190249426	0.506798701	-3.243284185	-2.167490572	-3.293746612	2.491542622	-0.664921056	1.519665096	1.675683993	0.911559331	1.251816867	1.578474795	-0.31728604	-3.739590428	0.196638074	0.997728655	1.378028763	1.218087602	0.526251878	0.947919057	1.776507766	-0.593581755	-0.927471769	-0.075127471	0.303793677	0.831846068	-0.974987951	0.714513334	0.608382103	0.236658569	0.922970547	-0.21284794	0.140195615	0.539617676	0.394633973	0.490661284	-0.149784556	0.032033888
19.68478001	-3.282515442	-2.376125419	0.810702476	3.595187326	-0.083217083	-0.674571302	-3.027247043	0.307159884	3.826074385	0.421010157	0.478732272	-1.180940468	1.176833454	2.232810442	-1.348881637	-0.043961205	-0.837888717	-0.627961516	-0.727052501	0.465367294	-0.702126529	0.689634223	-0.043747404	-0.143603431	0.220974309	1.262439716	-0.491543459	-0.242571385	0.298539722	0.821311945	-0.158810551	-1.022316641	0.409189386	-0.346462231	-0.116084002	0.158835405	0.393809793	0.355496896	-0.813618833
7.628806664	8.367437766	-5.998334766	4.846159556	4.500071471	0.864524455	0.125319099	2.324875813	-1.228852724	1.218048459	-3.445289577	2.189134982	0.991375608	-3.013184749	1.711370127	-1.638863382	-0.712791412	1.529824045	0.586814331	0.597104882	-1.418868444	0.932069265	0.224865654	-0.347878983	-0.034707558	-1.734064695	0.552508026	-0.49054472	-0.259497026	0.085159953	-0.136666697	0.5852882	-0.466729827	0.004651287	-0.406822437	-0.897497057	0.057574391	0.130289101	-0.584149791	0.411483871
16.41491351	3.480681451	-4.362137423	-2.865014302	-0.335009176	-0.310208615	0.412226271	-0.673643154	1.254035103	-0.689579663	1.387622264	0.484832118	-0.159382047	1.901022992	-1.589230427	-1.310799929	0.428444009	-0.369001924	-1.261690552	1.243024507	0.84825609	0.556753831	-1.242913455	0.171695211	-1.357529995	0.362353812	1.445605675	0.400186626	0.709382152	-0.2015364	-0.159812778	0.085675363	-0.470680367	-0.164209797	0.149496643	0.216361092	0.089278577	0.02938806	-0.285810917	-0.433062393
6.349302728	0.193673737	0.779130309	-0.179908356	-6.447364196	-1.722503922	0.566030525	5.439029954	-0.21836017	-0.302790547	0.23852911	0.520026311	1.052909164	1.056819608	0.301404136	-2.04477556	0.041413273	-0.695716189	-0.370584351	-0.429443458	-0.014074439	0.030224522	1.261757724	0.943701875	-0.525469341	-1.186015822	0.002744989	0.140537982	-1.040598774	-0.071761968	-0.097285281	0.11522208	0.387525296	-0.810312727	0.332720852	-0.322983636	-0.209614371	0.369967668	-0.124075095	-0.23134128
15.5300027	-4.352758466	-3.469055439	-1.695481904	0.232016426	4.894047145	0.06969063	4.424378337	-0.715450433	-1.307660453	-2.325576512	1.250658202	-1.111682363	-0.289610372	0.498633458	-0.790158197	0.272414146	1.5418374	-0.210681424	-0.127062162	-1.233173914	2.041104786	1.961344757	0.229592763	-0.430878382	-0.751718276	-0.801013662	0.453666905	-0.105961019	0.934801646	0.225038387	-0.170377344	-0.650655462	0.192349636	-0.098051493	0.032918822	0.205244274	0.108313103	-0.378290781	0.533368222
7.870199513	6.665196472	1.513372043	-1.39479517	-0.104222997	1.058460566	-0.092240491	-0.648814359	-0.958849915	-1.334029641	-1.738502615	1.334035933	3.549743972	0.779585376	0.108326872	-0.495023352	2.080069744	1.172051244	-0.446824148	0.187945005	-0.259470457	-0.645990501	0.198029538	0.383686271	0.511241561	0.568370286	-0.158794918	-0.782651833	-1.063141787	0.266694783	0.484568985	-0.498989611	-0.442021277	0.009237639	0.399996406	0.119080105	-0.557889896	0.089729151	-0.332911675	-0.454863206
14.88899451	-7.582386243	-0.199829961	-0.886087561	0.716034666	1.381884952	0.884343202	-0.415124654	2.787626476	1.710336918	1.229097048	-0.250987633	0.914621542	-0.275888093	-0.871323733	-0.978589537	-1.195644938	-0.006853849	0.637561154	0.479913016	-0.134387545	-0.129748717	1.041849289	1.207263963	-0.628495138	0.575549756	-0.611159535	-0.148610133	0.154227063	-0.528503086	-0.389948923	0.152794906	0.306951672	0.366153518	-0.157749	-0.583688692	0.619992888	-0.494127223	-0.384039612	0.299246705
13.97927407	0.38520877	4.482276493	0.664762444	-1.480400991	-1.599840238	1.058147992	-2.829916415	-0.879502754	-0.199908867	-0.106660328	2.700686805	1.151536587	-1.500643089	0.5228088	-1.60327976	-0.607357837	2.15398149	-0.581237859	1.267900208	1.28783912	-0.395392747	-0.508341867	-1.097183538	-0.681867634	0.320376153	-0.054432424	0.123692824	0.340274317	-0.469317307	-1.270596908	0.061109172	0.049855262	-0.208952245	0.180780196	0.649385199	0.116712775	-0.041588109	0.076280307	0.216608713
7.954592558	-10.25358496	-1.615507462	2.363884821	2.019023055	2.421562761	-1.573941915	-0.734880542	0.393767863	1.32633288	-0.007579786	2.895257304	0.894922525	-1.284629897	0.672234122	0.09404422	-1.205613139	2.360404421	0.483623551	0.272620071	0.872212506	0.128369992	-0.129231147	-0.304968898	-0.419851232	-0.618155979	-0.871756689	0.766037159	0.323622901	0.161427743	0.027844496	0.41124842	0.064464687	0.593521199	0.447934077	0.504422053	-0.216296431	-0.40850302	-0.516811818	0.125453324
4.981027506	27.9057146	2.29486959	3.089101738	4.991532677	-1.705512252	-2.763666804	0.681364436	-3.931931774	0.306927429	-0.19679863	-0.828589296	-0.55502967	-0.582606498	0.140455299	0.283398731	-1.309551331	-1.152804919	-1.311097095	-0.138989347	-1.409025945	-0.00951734	-0.082400259	-0.144006384	-1.123013575	-0.199387987	-1.078125868	-0.429384919	0.093345697	0.495047433	0.379817704	0.077452953	0.582111909	-0.214963516	0.595785302	-0.220163097	0.134127101	0.43308884	-0.189464232	-0.280339785
13.10587725	26.78277469	3.421634601	7.787902788	-2.544659764	0.80283402	0.383912978	0.392126123	-1.894520627	-1.57112989	-1.51965277	0.933830827	1.958563113	3.013895625	-0.791868649	-2.309967004	1.404164141	-0.934773255	-0.11064828	-0.945155998	0.147174516	-0.825123343	-0.27788844	-0.402485681	-1.097020886	1.092782699	-0.207685636	-1.311765654	-0.478076428	0.215093869	-0.937739282	-1.106898571	1.254427155	-0.218145579	0.611987666	-0.152950712	-0.062508995	0.582221306	-0.350345932	-0.089516843
8.152775693	4.66616356	0.989077868	4.424955579	-3.845387734	4.120333419	2.575815821	2.581300105	0.727381923	0.888740288	-1.973906331	0.865171997	-0.574156024	1.039984886	1.871630945	-0.767953155	-1.075362592	-0.252659212	-1.723005905	1.20795259	0.555593668	-0.208562043	-0.909426838	1.001049615	-1.084474241	-0.109995896	0.572722122	0.341189542	-0.16165275	0.120754304	0.614762018	-0.433508573	-0.046304795	0.276652897	-0.181052974	1.184921037	-0.401851621	-0.55083667	0.470116518	0.142882537
-12.24085951	-4.871999346	0.486399707	11.67119217	-0.391985335	2.426039969	3.767055389	-0.91625044	1.41470732	-0.567038753	-1.58438706	1.190410583	-0.761562061	0.161525602	1.120307159	-1.601912339	-0.556574243	3.208440982	-0.811253524	0.1892876	0.916034408	-0.580843474	-0.73260031	-0.707551399	-1.185185781	0.376739144	-0.699632813	0.39202599	0.917313172	-0.296767257	-0.006026387	1.02632708	-0.077496274	0.124078702	0.631100351	-0.805750956	0.134867533	-0.096023489	-0.344935331	0.204598374
11.85044888	13.28458616	-6.334296613	-1.278568523	-2.273105861	1.43431367	1.686502558	-1.630596382	-3.186276326	-1.184892633	-0.510308803	1.912625784	0.510783313	0.663686186	-1.185820271	-1.185012556	0.176551738	1.04130811	-0.302060741	-0.402629011	0.180713671	-0.783335378	0.766930192	-0.031006736	1.006116782	1.025909645	0.394061679	-0.292588522	-0.247761731	0.398045365	0.393240811	-0.669823304	0.182973033	-0.106103632	0.273124646	0.269322186	-0.165264387	0.048172902	-0.231014306	-0.10982588
19.96998853	-0.91695878	-3.621676253	-1.603940379	2.494976127	4.687619367	-2.431614357	-1.90730678	0.855474675	-2.108198336	-2.169472987	1.295808775	-2.108950536	-1.984402595	0.249996185	-0.73801565	-0.634914115	-0.037096758	1.359917659	-1.595779079	-0.089620306	1.382477444	0.895743998	0.067250609	0.549793041	-0.169859648	-0.196647861	0.976446362	0.328106894	0.832524271	-0.347009189	0.106817143	-0.537597213	0.31177359	0.275275573	0.692399728	0.275178569	-0.162987083	0.297341967	-0.079801315
13.82578768	-4.542353125	1.424548403	-3.172731502	-2.70476323	0.660614425	-2.092299164	2.430636592	1.474134874	-0.863596547	2.035266356	-1.397157894	-1.89116267	-0.842405594	0.685523904	-0.047119075	0.81076035	0.266969881	-0.553266528	-0.464546842	0.003391691	-1.549616086	0.796756689	0.538728602	-0.059852304	-0.745569788	0.708460305	-0.332544283	0.930891539	0.254389468	0.244250919	0.257778576	0.394387732	0.078219487	0.285848352	0.023207653	0.121115008	0.143219075	-0.103102057	0.257734265
20.00600778	-2.037910767	3.894938121	-3.953087403	0.792197461	4.266725749	1.060871831	-1.676569342	1.513330498	0.723327332	0.635383178	-0.597974716	0.022117927	0.44792089	-0.46592702	0.810881299	0.001739428	-0.328950643	0.342061332	-0.11970515	0.104365778	0.462029497	0.50834412	0.575085306	-0.876272011	0.489744492	0.492887693	0.367904162	0.211377122	0.042310759	-0.673592824	0.235761396	0.004766523	0.251256769	-0.100652974	0.390121542	-0.167774331	0.278956785	0.527362742	-0.229301544
13.04505736	-5.847243323	-3.715888513	7.127246696	-2.772926216	0.112884813	-0.957368252	4.047961466	2.001053492	-1.399060549	1.171475528	-0.466990769	-0.760627303	-1.158591218	1.551981587	-0.975471527	0.588219037	-0.304562553	0.54729727	1.460497498	0.127394835	-0.454292505	1.349785228	-2.055579086	-0.570016815	0.904902567	-0.093224843	0.073259541	0.535402235	0.527539187	0.136699885	0.449301254	0.159525851	0.792197794	-0.094369265	0.13564475	-1.659817435	-0.242143515	-0.214919171	-0.012044172
13.00886635	3.704711737	-5.468953417	6.460187145	-3.505119018	-5.259203233	0.146374803	3.168540315	1.014519158	-1.110364528	-0.995400183	0.196525752	-0.107926211	-0.040796284	-0.464135234	-1.204595543	-1.349937198	-0.365492127	0.136473901	1.46716937	3.049180698	-1.399991014	0.268456781	-0.325504045	0.772588381	1.772347918	0.426773604	0.347469707	-0.40564625	-0.801555072	-0.197246228	-0.165405065	0.315452611	0.384919676	0.315153461	0.026933505	-0.729230351	-0.108422519	1.063766992	0.111790846
-6.196797798	-18.72671404	-4.389216616	6.218822355	6.043765356	3.238029759	-1.858680117	0.190754729	-1.322964248	-1.612928823	0.773880086	1.050037067	0.627348792	-0.650294147	-1.353608232	-1.418191307	0.83944363	-0.637699982	0.344786919	-0.07382468	0.18523262	-2.568980583	-0.11790033	-1.255713035	1.158021068	1.177038265	-0.914518391	0.581679138	-0.176771565	0.200786879	0.201612899	-0.073949426	-0.711797913	0.101254543	0.492827234	-0.434590807	-0.504903045	-0.585026641	0.564693361	0.03816871
3.215004229	-7.355901927	-1.027221051	3.253593076	2.866956305	2.817982323	1.883212543	1.237877859	3.87277024	-1.863569301	-1.383730004	1.105679628	0.788948474	-0.337674968	-0.177669188	0.35553634	1.10956432	-0.455102778	0.230738388	0.786358699	-1.057340736	-0.487220643	1.476907547	-0.43533775	-0.020313283	2.374380267	-1.434082882	0.76031652	-0.491838561	-0.782699101	0.183112242	-0.154466307	-0.408396139	0.339184067	-0.174035662	-0.11610925	-0.479832658	-0.212006092	0.668744984	-0.381970191
-1.572248576	-2.234305398	-6.36725495	3.479647112	1.805099289	-2.06469916	1.230360929	3.958906805	0.255916344	-0.898605847	-0.245512875	0.481902027	0.106762774	2.00670555	-0.393678619	1.261073759	0.518485951	-0.922189762	0.734703002	-0.400256767	1.337072286	0.117699074	2.114267154	-0.741163747	-0.856696573	-0.074027438	-0.885336089	-0.169020013	-0.355465545	0.608749574	0.415588431	-0.568080522	-0.222287372	-0.30890853	-0.528594841	0.07609334	-0.308563947	-0.415226623	-0.194207754	-0.046463289
7.169882667	15.16694609	-9.151095971	14.40660226	5.946020306	-0.97933224	0.330633254	3.427013736	-0.946750031	-0.800324839	1.347772066	2.085058966	-4.019853739	1.428288476	-2.060185581	0.342368971	1.530977255	-1.123757575	-0.000554899	-0.729750475	0.915056415	0.848043973	0.537954389	-1.20701588	-0.066488635	1.088805445	-1.524867875	-0.615695398	1.221833726	0.227484106	0.298335714	-0.076766998	0.590361269	-0.311315669	0.273480921	0.095732912	-1.031768589	0.143693562	0.786621568	-0.368687513
2.471492784	5.883180603	-7.060582539	3.518152976	-0.660211581	-0.715992097	-1.576486217	1.548777306	-0.077803802	3.387854622	1.694089181	0.83384721	0.781452968	1.753027993	1.797883624	1.657858014	1.70163331	-0.078485562	-0.065191503	-1.361411152	-1.245595214	-1.709495907	0.666826428	0.544806287	0.520544586	1.430711952	1.04381645	0.565325152	1.141718706	-0.631312634	-0.126095364	0.08429365	1.003238683	0.252860447	-0.236028628	0.138016315	-0.348070523	0.277530621	0.16700004	0.211320436
21.05008179	-2.10429335	-12.60753197	3.061207873	1.803074251	-0.700654871	1.381448668	-1.902987947	-3.477866939	-1.713866873	-2.409263621	2.402474136	-1.611587282	-1.295044133	0.557169115	-2.250688849	1.183951425	2.786898788	-0.872533724	-0.570954546	0.340747824	-0.021717756	0.208677109	-1.063411681	0.380295104	0.280763294	-0.615932137	-1.210829974	-0.605936255	-0.212663156	0.173124708	0.212124818	-0.013750994	-0.317922733	0.15731397	-0.52988948	-0.158319839	0.275080602	0.634450793	-0.450079044
15.49987225	2.552478925	2.739431415	0.292965478	0.029056129	0.05455837	-1.589619178	-2.158104703	-1.894880435	-0.499521488	1.533752021	3.287357419	-0.185760035	1.052735494	0.113672503	1.628593043	0.436157363	0.032689055	0.309639207	0.107133179	0.133044812	0.093161445	1.229283742	-1.22842753	-0.596425641	-1.361697215	0.146793385	-0.792917453	-0.237379547	-0.647266747	-1.050409369	-1.35320528	0.478048452	0.637591676	0.372752919	0.292673656	-0.208805993	0.144855275	-0.040865172	-0.089040903
6.591643974	18.19404329	8.950658452	5.018777383	-2.034856729	-0.989716885	-0.869439369	0.571259722	-0.476809958	0.686485539	-0.560339642	1.260434792	-1.048199439	1.004776386	-2.721972494	2.054041366	-1.445022113	-0.132997625	0.301731986	-0.226411647	-1.399222905	-0.225963516	-1.1883278	-0.502538961	0.129735175	-0.728207693	-0.076879398	0.147533457	-0.457262966	0.184839084	-0.134103662	-0.215636543	0.021417045	-0.816198805	0.032383203	-0.482505206	-0.031064823	0.004507485	0.756837234	-0.011913321
18.98863715	-6.032712092	3.680042007	-2.056392284	-3.730028269	-0.196188531	-3.494627953	4.185120885	-2.185221462	1.403660701	3.214716854	-0.101193873	2.948175328	-1.966662	-1.468626759	1.745334246	-0.748669188	-0.580486353	1.265538975	-1.713897494	1.660474101	-1.0891782	0.880835219	0.265122176	0.836355322	-0.752426159	-0.224611229	-0.722021357	0.004370746	-0.401857486	-0.073514192	1.146123313	0.100854664	-0.440038166	-0.784860856	0.144277317	-0.512269428	-1.010258511	-0.133454565	0.286731703
-2.628156876	13.58388095	-7.84486092	5.752144619	3.950659652	4.090953475	2.383793714	3.288603382	2.660202125	0.229558824	0.237397296	0.307783008	-1.882450242	0.566905799	2.232861124	0.510144445	1.146497926	0.715434906	-1.989154238	0.010810442	1.570165122	-0.972607391	0.50278603	0.166645606	-0.656343167	0.36445027	-0.915469302	0.059328841	0.219777145	0.591905022	-0.256216099	0.627750009	0.376909602	0.153983329	0.824401697	0.201882466	0.505970168	0.021942901	0.058649148	0.014102386
-4.29103797	6.300388177	3.225502296	4.905657627	-2.084244292	1.889426142	0.641327455	2.946499345	1.010219144	1.400147582	0.495705515	0.356197137	-0.197273758	-0.227499343	0.640821146	-0.273445066	-0.110197832	-2.521958948	0.880211763	0.803505948	-1.333864432	-0.008680672	0.362097224	0.599808399	0.72574916	-0.96367614	-0.775585458	0.205987345	0.006805091	-1.069915768	0.979877335	-0.38541688	-0.764383266	0.391599993	-0.246566264	-0.057051245	0.097514419	-0.443044134	0.142935642	-0.14110522
18.35948691	-11.16386884	0.562982566	-1.65586039	3.05397714	6.625326766	-1.151323582	0.918424	1.822402711	-0.4439547	2.721170392	-0.958811776	-0.537694024	0.548311574	-1.101273532	-1.08675875	1.558521819	0.89420781	-0.347324938	-0.086535518	-0.677911426	1.238565111	-1.684652037	-0.20827242	-0.810502018	-0.974733878	0.211610379	-0.44816034	0.094043177	-0.603474415	-0.189540515	0.01678392	0.169148577	-0.358567333	-0.038356686	-0.055892854	0.802947948	0.073369346	0.115591582	0.185200271
20.38377943	-10.74081204	0.516396658	-3.343955009	4.293776458	3.81381827	0.820244587	0.475190819	2.826078651	-0.077436415	0.356445163	-1.018803883	-0.369836745	0.681022907	0.305415442	1.298669332	0.312496346	-0.105529675	0.382252077	-0.464079412	0.153148832	0.867774799	-0.038252027	-1.28456805	-1.181106847	-0.262514194	-0.352921954	-1.089178308	-0.64015832	-0.332780384	-0.567293786	0.335759838	-0.165428795	0.058765304	0.352945064	-0.199619381	0.491096639	0.057715032	0.097077166	0.522864956
4.078345717	8.347282433	-4.689592333	0.616407021	-1.854560697	4.412420438	0.872665498	1.153728463	3.060053377	1.353427447	-1.429730704	0.052635756	1.890296304	-0.619892484	0.70424862	1.000706352	-1.892336012	-1.516775197	-0.333681271	-0.915146543	-1.710597531	0.905829574	1.477289164	0.647956721	0.118994638	0.404852598	0.357546258	-0.053272891	-0.497174881	0.26201575	-0.13550061	-0.722429101	-0.336592558	-0.526431551	-0.08984787	-0.13583894	0.520186453	-0.119957099	-0.447005167	0.280494802
1.660633144	-4.329100281	-13.12210684	0.352884377	2.161660757	9.956418143	1.848970204	-1.492268606	-4.210447363	0.493496852	-2.117061539	1.494507098	0.187639989	1.04846786	0.233941181	1.490938843	2.481174946	1.799771442	-1.310626277	-1.692726604	-0.534833905	0.057543661	-0.449686057	0.394491067	0.402060254	-1.052469608	-1.145496696	0.607125931	-0.508854671	-0.622418144	-0.495491153	-0.264786663	-0.228053087	-0.307587908	0.487508225	1.062990415	0.155249218	-0.463920089	0.044537607	0.214675073
2.59478516	12.56863119	-0.863954871	0.207036699	2.124776551	-3.243867598	0.208530704	1.181895009	-3.64530024	-1.258111055	-0.069517516	0.839313424	0.480096602	0.456237472	-0.923716992	-0.153577276	-0.106529313	0.452874278	0.106419414	0.919522099	0.425493904	-0.421675502	-0.578454079	-0.692258677	0.053151901	0.485471722	-0.369770296	-0.190419597	-0.493983272	0.00765387	-0.627126857	0.241147245	0.67721782	-0.092674764	-0.108283305	0.13217801	-0.593040247	0.291683236	-0.54147071	0.049489005
9.773975749	4.618549536	6.407009486	0.337324114	0.481907068	-1.081115733	-1.655025003	2.628378012	-0.655085537	-3.403301009	1.012278418	0.848495766	-0.909442533	-0.166178752	-0.719127402	1.480485633	0.030303421	0.969415887	1.287797986	0.195849955	0.96571475	-0.686816185	-0.071887741	0.249125627	1.362403876	0.512671154	-0.23169695	0.308362208	0.196331651	0.915477757	-0.764397975	0.062355177	0.175378196	0.040782723	-0.175834179	0.853727242	0.284208959	-0.086898675	-0.282784178	0.224044961
14.68601522	-5.026942125	-1.194306324	-2.980487618	0.166549295	0.031691312	-1.038741805	1.229858905	4.304022712	0.708549866	-0.656946508	-0.441205791	-2.093295155	0.320036879	1.137460201	0.476623277	1.966603426	0.128184438	1.759721695	0.825198179	0.507845477	0.067361615	2.03501105	0.326964929	0.183972652	-0.453726209	0.186655071	-0.996902009	-0.728031809	0.781469136	0.13652453	0.829216106	-0.214553629	0.181580492	0.477927807	0.241076454	0.526920724	0.737872174	0.338921657	-0.304958798
6.500842733	15.50622786	0.407085568	0.326579333	-0.561098719	-0.101517214	-1.593957645	0.895379407	4.756116199	1.139408475	-0.162961073	-0.047217462	-0.179018244	1.920273536	-0.517890032	0.062185578	0.465351843	0.057028241	1.764468467	-0.099441877	-0.31641222	-0.562448696	0.498433877	0.080794269	0.991630959	0.103279506	0.060270495	-0.166258026	0.468069833	1.217230809	-0.312201397	0.658634626	-0.512494309	0.713136181	0.076841997	-0.510050013	0.033993586	0.383191405	0.103624189	-0.400287158
11.129353	5.513143343	-6.029989425	-2.030461657	2.139885681	-0.785003705	-2.249498973	-3.84235475	-1.806123307	1.091741194	-2.08785587	0.672885754	2.358161429	0.265041929	0.600967829	-0.426186742	-0.293362351	-0.179578668	1.648103456	-0.833381372	-0.291390659	1.046818491	-0.184478588	0.893812898	-0.359791579	-0.26306139	0.159128613	0.898861331	-0.21127863	-0.489705668	0.044683425	-0.012966531	0.488873704	-0.124879173	-0.29526972	-0.010416217	0.284577806	0.157048998	0.160535483	-0.252069763
11.78349913	-5.580329801	2.10413042	-2.281904682	0.72119549	2.594680739	2.705645793	0.714857005	0.902575609	0.978793319	1.99146685	-0.50764763	-1.473256363	-0.123468281	0.253913128	0.158599228	0.871770804	-1.263730708	0.650806073	-0.72308676	0.671107259	-0.95169683	1.092091783	-1.349782751	-0.550790168	1.278850557	-0.618112748	-1.271262636	-0.780289549	0.294759251	-0.174969068	0.084582806	-0.63952486	0.279648911	0.489315491	0.1513434	-0.218010555	0.210630734	0.108986129	0.055000196
11.85574703	-2.212514311	-2.907184532	-1.13647784	2.397864101	0.087266879	-4.727903305	2.833276764	2.234421575	-0.625593579	-0.362746889	1.86011584	-0.899548813	-0.923660427	-0.039302844	0.459068603	-3.301507364	-0.596264305	-1.073049049	-0.061252958	1.015004213	0.092353096	1.287404061	-0.559552928	0.014098741	0.872146236	0.895940307	0.281426525	0.184781015	0.063721223	-0.847417189	-0.095257378	-0.471905572	-0.522944932	0.13523805	0.383105393	-0.367216579	-0.03053407	0.161502389	0.068671711
6.797501521	-3.134196633	3.633721083	-3.650035475	-1.013558684	4.520699482	-2.34708256	0.931668918	1.78626	-0.009221116	0.335453089	2.22652906	-1.536049538	1.021898518	1.368166212	1.355021553	-1.558569839	-0.37221197	-0.273790185	0.164955594	1.04852918	0.047822682	1.898050001	0.93467468	-0.603262629	0.527373989	0.326003798	-0.574544022	-0.063645037	0.588041155	0.423652874	0.23851467	0.570685577	0.293682881	-0.239960609	-0.117772639	-0.121454689	-0.176499603	0.293969485	-0.072844185
6.138233822	15.39531043	8.140788246	6.018071554	1.087766533	0.882452115	0.106211925	-2.133824423	1.450561298	-0.068607317	0.819650362	1.975427759	-1.639358286	-0.428741026	-0.258185947	1.296494338	-0.529706189	0.319744707	1.220645932	-0.165631882	-0.966403603	-0.225708171	-0.23968557	0.353361932	-0.066651585	-0.362986394	-0.395430576	-0.899945872	-0.173023148	-0.451847336	1.240320153	-0.128484515	0.183826304	0.110513338	-0.013017051	0.258269938	-0.26728442	0.236542279	-0.15267354	0.18574463
-0.639609862	-8.006542822	10.04650981	-2.146270218	-0.686133752	0.322031922	1.591570647	2.441762999	-3.076775282	-0.29820599	1.182928866	-0.569538459	-0.742631909	-1.272102744	-0.388611495	-0.6065055	-0.6827476	-0.07015392	0.481992134	0.933385561	-0.320893243	0.220800993	-1.209634713	-0.108466161	0.171953342	-0.299724225	0.066545317	-0.105034339	-0.015233679	0.059863822	0.063616171	0.076474738	0.273318225	-0.3222344	0.172582254	-0.051457922	-0.28988728	-0.665574419	-0.226137147	-0.222692121
7.549746802	4.238869264	-6.814993274	4.767758043	-0.092409852	-1.651627138	-1.544285202	1.107507509	-0.236170499	1.203386854	-0.864275757	1.767948352	0.269570029	-0.300830247	1.655161719	-1.388180616	0.396320377	1.684774099	0.202471553	-0.932729338	-1.059083899	-0.657769258	0.79873306	1.040199561	-0.49610843	-0.553593624	1.341102999	0.327959341	0.528087504	-0.11590038	0.684036321	-0.666358062	0.284092774	-0.704581625	1.130830963	0.435768751	-0.044692598	-0.445340304	-0.162023779	0.333917882
6.536314945	2.693396772	-0.604162516	7.879508608	0.739622691	4.199319567	-1.015403076	1.167638367	2.624897892	0.495957621	-0.755297373	1.548129064	-1.507032397	2.113775034	0.346389074	-0.601346817	0.324406327	3.145725232	0.339268818	-0.849768951	0.253435188	-0.665048753	0.836098473	1.072273424	-1.815281784	-0.536317674	1.206865139	0.413798206	0.325793356	-0.978223765	-0.560847235	-0.225239529	0.470064524	-0.511525852	-0.084069771	0.692814588	0.079457368	-0.780085757	-0.234596966	-0.007240469
8.634708491	6.801748748	-2.967695769	1.154246906	-3.069715974	1.321149704	-0.40707394	1.029076162	0.634794079	-0.481435186	0.516185281	1.003580836	1.020980818	-0.1568883	-0.084681234	-1.476081516	0.736256341	0.642126558	-0.129087013	1.448259065	1.27995892	-0.357703712	1.878164649	0.870177122	-0.105086658	0.397054397	0.850215701	0.35568784	-0.267683235	-0.204030037	-0.709217967	-0.496828192	-0.125150841	0.303149268	-0.473213946	-0.281749412	0.476508917	0.156163485	0.453728157	0.50618738
4.941494896	8.481749224	-9.076401779	-3.719117784	-0.530114138	-1.762486647	-1.081251891	0.046413089	0.642926739	-0.632988556	-0.925455326	-0.398219662	-0.609719131	-1.280017358	-1.161520497	-0.3293478	-0.175075886	-0.219332222	0.275873151	1.168272424	1.215617455	1.941587007	0.413241496	1.005978717	-0.508521335	1.143628039	0.894660217	0.460218257	-0.506606532	0.018443633	1.201618966	0.112021925	-0.162121416	-0.098653815	-0.484578886	0.531571628	0.493070832	0.417117641	-0.090344238	-0.137270807
8.862961562	7.827940729	5.851865215	-3.431825627	0.756517674	-1.070654744	-1.028348924	0.029675923	-0.47067001	1.13770582	0.818226057	-0.030586163	-0.466825898	0.931310326	0.869940847	-0.269190579	-0.128001596	-0.241139289	0.351821454	0.645882692	0.084755912	-0.11938213	0.464877859	-0.033425106	0.073325991	-0.259233397	-0.045579652	-0.352051149	-0.873209532	0.002393129	-0.266714207	-0.008697059	0.279977579	-0.306511875	-0.778552277	0.233909619	0.014818022	0.271053624	0.195338204	0.127369875
15.57875314	12.050226	-8.931939675	0.586244953	-1.521165541	2.401247157	0.706604103	2.902690465	0.57041597	1.476151376	1.734760495	-1.563653491	-1.422432115	0.687178289	-2.289338856	0.650375403	-2.883683285	0.889010689	0.80805535	1.308090228	0.247501554	0.637278745	-0.909464367	0.33966954	0.450205404	-0.76858945	-0.306101102	0.409087013	1.07250206	0.635291704	0.206211003	-0.438624889	0.42904875	-0.094580099	0.18605755	-0.017062902	0.342563459	-0.336578666	-0.210313292	-0.033656407
11.09680901	-2.985355799	-12.5297212	-2.072739688	-1.125420757	-0.351160332	1.12842261	2.213112671	0.04112769	1.871064762	-2.082034233	-2.419412412	2.003628799	0.370074709	0.59479405	0.124087922	1.458789426	-1.719235267	0.787461014	-0.314423215	-0.542334612	0.19201745	1.573732581	-0.338382893	-0.052793314	-0.560004339	-0.851217794	-0.421536763	0.762890787	1.158250211	-0.00438216	-0.027265258	0.292118683	0.296584542	0.318987132	0.06250675	-0.792257558	0.155469937	-0.965784714	0.671247616
14.55123576	11.0012022	-10.84195123	0.008901797	3.8042966	-0.24139539	-0.790165909	1.798590072	0.04162076	-0.579218724	1.998426759	0.003647737	-1.196822335	0.421223166	2.696094261	0.216104933	-0.676355384	1.342352423	-0.108675812	-0.657083253	0.127619399	-1.467997084	1.89117458	-0.240772663	-0.938390301	0.660191309	0.761200701	1.068463578	0.375565146	-0.040029939	-0.070396777	0.438068772	0.052025171	0.143188264	0.036472413	0.493404449	0.0969625	0.474259585	-0.328695299	0.613925802
13.65148316	6.847256492	-4.275880689	1.823231646	-0.59675755	2.700990364	1.903032745	-1.097396075	1.92954336	-0.001305304	1.398948043	-0.278369818	0.790998863	-0.098067046	0.845154358	-0.505280326	-0.273310747	0.664881787	0.165724036	0.246894908	-0.009542262	-1.396925677	1.997698616	-0.150611386	-0.750143873	0.065763815	-0.482323052	-0.503549765	0.293183346	0.199682855	0.713587107	0.785914801	0.121788198	-0.061103025	-0.145098237	0.006282406	-0.622884375	0.31588753	-0.474085491	0.273367939
-0.852243455	-8.10273604	-4.183659911	3.137342499	-1.294088064	-1.717105483	-2.312611342	3.282651055	-1.046796854	1.649726203	1.765559397	2.283307492	0.656077648	-0.377828533	-0.342001	-0.083526054	1.019782966	0.611368232	0.379573109	1.358193818	1.009733225	0.604671674	0.235000892	1.674677289	0.938071542	0.065026204	-1.501800464	0.446955012	-0.090770743	0.212644062	0.365470622	-1.163945436	0.367269495	-0.414330199	-0.323049278	-0.395308787	-0.534038637	-0.092648117	0.447880462	-0.115748107
3.857318106	-5.148141038	-2.306321498	8.418961726	-1.360430936	2.701848167	1.390297365	2.670350807	0.757279499	-2.511265148	-1.989557938	3.292084815	-1.724354121	-0.834396993	0.156672436	-0.213548456	-1.126901747	0.615554612	0.116366036	0.214905209	-1.149095854	-0.062834858	0.01674913	0.362961213	0.084680549	-0.358811602	0.111568576	0.862267528	-0.508486966	1.193189576	0.190979902	-0.604717723	0.034178591	0.375768338	0.464105511	-0.300853802	0.116594887	0.274701534	-0.16935874	-0.244955619
16.30588037	-0.968390016	0.38373512	-3.588806193	0.640582545	1.275871723	-2.257713992	0.209446906	1.913764929	0.275549572	1.250608141	0.366658761	-1.303854868	-0.461401446	-3.166996038	-0.882630139	-1.961411336	-1.288899603	1.448770858	2.130834737	0.289626163	-0.005529048	-0.036457524	0.512134678	1.033302205	-0.779499826	-0.012080292	-0.523647238	-0.138621307	0.514657594	0.225869087	-0.616853274	0.343693746	-0.000970594	0.024103599	0.04405869	0.044082434	-0.087387212	0.171273438	-0.259021343
12.8929866	-0.448303164	-2.551956214	-7.801328372	0.997396731	-0.033852697	2.21635388	-0.591254692	0.426029132	0.840270812	0.841726476	0.136666758	1.203874469	0.790952199	0.404193289	1.294811635	-0.487313556	-0.048340098	-0.589682966	0.149748302	0.657301074	-0.367842277	0.914606335	0.286768257	0.052541238	-0.363331742	-0.76996443	-0.00169989	0.564522787	0.192677518	0.148508278	-0.440357251	0.331610404	0.091431231	0.0544225	0.390660589	0.066299651	0.429503087	-0.517295526	0.195169173
11.42263932	-7.610967144	2.585047134	-2.765712254	2.225338508	1.12450911	2.685042672	0.727909616	0.432075611	-0.709555496	0.439847946	1.437913409	2.351942771	2.344811107	0.549734688	2.551190214	-1.594404895	1.538441294	0.210760585	0.551543498	0.120752204	-0.241499622	-0.057664378	-0.777900341	0.331749724	0.439554218	-0.254753564	0.476928632	0.297411093	-0.360959871	-0.015703316	0.60676499	0.434795126	0.274243797	0.530518533	-0.008606255	0.155038532	-0.465519212	-0.188910008	0.015589521
2.734910531	26.14433405	-12.1582264	7.249973429	3.067800094	8.461570441	-1.416221499	-5.003103075	0.732817181	-2.804125446	-0.34851002	3.557286218	2.693512666	-0.794807509	-1.538631417	-1.926279614	-0.380953227	0.158556683	1.536232839	0.485079061	-0.442712331	-1.911473117	0.237675097	-0.701690338	0.577046449	-0.183049124	0.439848263	-0.983198894	0.456465394	-0.201717976	-0.384116962	0.104482148	0.65324118	-0.158149637	-0.440196532	-1.175596381	0.046174101	0.032357381	0.045478181	0.454933152
-4.601340058	4.263567207	-4.871821825	3.8172544	1.923651668	3.471350104	-0.195497709	3.387810638	1.067500776	1.310108075	-0.343152692	2.54361014	-0.339465898	0.746770009	0.203246453	-0.224929446	-0.902166734	-0.093963756	1.337328428	-1.126099756	1.708242151	0.784162593	-0.439849974	0.044812045	-0.090003158	-0.87409632	-2.020967269	-0.09617099	0.044376141	-1.371903057	0.561115499	0.184614401	0.149248602	-0.012477267	0.534447259	0.119311436	0.273138716	0.433022881	-0.803586211	-0.417605846
2.060315136	25.04874063	-15.5496475	3.250401873	-3.244221169	9.065760692	1.930478083	-2.525121821	0.274595628	-0.666115737	3.17066675	2.093037557	2.581235583	1.668553666	-1.65334177	-1.59575815	-1.926145124	1.980968433	0.485181702	0.410850888	0.929123413	-1.485271114	0.273488045	-0.324431894	0.802009431	1.786959683	0.692563573	-1.306983484	0.284768071	-0.252638398	0.157934874	-0.82808047	0.477574818	-0.268765858	-0.59824874	-0.016424155	-0.115732117	-0.329056701	0.138084524	0.168298455
9.574044267	6.164831739	-9.085901743	8.687023247	3.47527879	6.58230114	0.517860282	-1.261339916	1.923397925	-1.145824582	-4.204385232	1.42464284	-1.387269261	-1.959565708	1.865985563	0.293292377	3.208242559	0.662814118	-0.530137595	-1.069063871	1.69446263	0.582739532	-0.035927607	0.153833779	-1.046461227	0.184537613	0.265311976	0.712039125	-0.103403878	-0.320636705	1.494137795	-1.07569331	0.358415863	-0.825262866	0.027695218	-0.809780487	0.982481362	-0.577294336	0.520496152	0.423100495
5.351268101	-22.84111178	-3.957385336	6.010215089	2.252574081	1.465548315	-1.458371408	0.972935677	-1.929400956	-2.371086664	-0.004803624	-0.417782917	0.01680437	-1.09018287	-0.494515755	-1.163778634	1.534850794	0.117902939	-2.242622115	-0.65384784	-0.599086747	-0.285881733	-0.815064333	1.077298744	0.853938852	1.137319451	-0.01947512	-0.306460786	-0.28859378	0.393433305	0.985550084	-0.262968919	-0.017709458	-0.429320512	0.131164118	0.028903555	0.377790339	-0.154964021	0.449352602	-0.202510351
7.704760674	-3.823254509	-3.446897164	6.213385538	2.343332363	3.261073959	-1.336926535	1.239947812	0.899305032	-2.077266438	-3.091528548	0.271096357	-0.570075901	-1.321714698	-0.832726198	-0.189684589	0.987329763	1.823242178	0.390433399	0.966706631	-0.292017763	0.496683933	-0.1607183	-0.067400405	0.11772974	1.137161397	-0.108618581	0.885574698	0.646868712	-0.098766002	-0.303386819	0.751992398	-0.366654409	-0.204251637	-0.578808021	0.897713577	-0.1580196	0.195138444	0.209799393	0.092739965
8.318004469	-7.614202271	-1.954160384	1.728024331	-0.025982395	0.237284553	4.479652489	-0.409714171	1.762201078	0.297398386	-0.640101166	2.180202947	0.950400512	0.797404979	1.826096355	-0.150449891	0.767140585	1.412614103	-1.359139814	-0.284443058	-0.683149846	0.238953052	1.240878398	0.022414916	-0.707038491	0.670576035	-1.408231642	-0.642689229	0.520046983	-0.100440182	0.651604979	0.389106442	-0.304172424	-0.590483936	-0.207233595	0.251154339	0.670783808	-0.799681104	0.268895108	-0.620738777
8.905452023	-17.77433671	-6.133645447	5.989232403	-1.293176375	0.343633638	0.495562341	2.080933435	3.04230523	-0.657674932	2.273964117	1.279913476	0.056336325	-0.866852689	1.648888098	-0.276338784	-0.30143316	-0.401036909	2.373601977	1.482630497	-0.9879684	0.978248042	-1.08994011	-0.298793206	-0.65735567	0.570230035	0.717154488	-0.436048104	-0.003434898	0.975560254	0.109037854	-0.13582385	0.202704878	0.473682723	0.557341594	1.314933507	-0.096064087	-0.040367398	-0.762414376	-1.361282224
11.72485049	-8.910188052	-7.691184381	-0.954508808	2.161878455	0.848644736	-0.34843795	3.242428416	4.811996325	0.298089888	-0.806740139	-0.861653595	-2.994450881	-0.587068385	0.699907667	1.35086998	0.71831811	1.466536164	1.718971322	1.912102334	0.21903211	-0.589183745	1.055016132	-0.374696836	0.7576541	-0.847377844	-0.25791408	-0.216605964	-0.169874097	-0.027962621	0.278245782	0.160390582	0.676210808	0.172425171	-0.043831814	-0.793724579	-0.689211347	0.744682942	-0.310448086	0.119908293
0.695596559	-1.242949433	-11.25488912	-0.451862142	1.229894092	2.236239045	1.281963318	4.740475207	3.152061293	2.885365285	-0.818463661	-1.194687336	-0.020953803	-0.750434307	-0.079835292	-1.253295911	-0.643160789	-0.229002013	0.826598322	1.376828434	-0.598796938	-1.806903599	1.928496201	0.226329888	0.623642443	0.744333549	-0.42965012	1.129629968	-0.146936759	-0.382786392	0.199888635	-0.571019147	0.054028675	-0.288763066	-0.19867316	-1.21301098	-0.086439941	0.734107	-0.391259078	0.146288751
-0.254181264	19.13885785	-9.749206314	5.718757436	-0.418942948	7.012696722	2.880747631	1.521803224	-0.085409134	-1.679151463	2.341294871	-0.677435598	-0.170734782	-0.70340356	-1.608515466	0.863622649	-0.681283947	2.18886081	-1.730063691	1.79300668	0.295682897	0.952752084	1.809279557	-0.759938404	0.988185182	-0.293045129	0.016909558	-0.191837519	0.26949033	0.87676213	-0.268249204	0.355157145	0.092366597	-0.708009516	-0.298622937	0.642436018	-0.038925835	0.346690966	-0.523654908	0.348503327
8.671529292	11.06668666	-2.513266699	2.29425466	-1.071784527	-1.479541121	-2.949905341	0.718923738	2.806901627	-1.864695941	-0.020094496	0.956039582	0.975594819	-0.999808111	-0.870433618	-0.399293282	-0.246483423	0.257806299	-1.719673149	-0.122425021	0.018122099	0.713330437	1.873400236	0.553000282	-0.554916344	0.20431004	-1.147707989	0.986416519	1.100664529	0.151626815	-0.191003222	0.435434578	0.615026084	-0.257552085	-0.225461788	-0.095402945	-0.524518349	0.188646711	-0.340966839	0.00254972
6.877918901	4.17099643	-5.26527894	1.564691715	-1.292632553	-0.315123647	2.999357336	0.119299168	1.772005149	-0.974146109	1.626155557	1.758962992	-0.178069234	-1.478734825	0.761946186	-0.13329918	-0.220411584	0.121741902	-0.679882505	-1.900165892	-0.6693141	0.019426267	0.356053798	-0.807905826	-0.564940733	-0.445720287	-0.175313041	0.371159562	0.513233518	-0.409063566	-0.131186025	0.109173915	0.04348717	-0.153015177	1.001249591	1.115366325	-0.087409348	0.162018045	-0.574648398	0.050831991
15.76591471	-0.524321875	-7.349981692	1.384202294	0.216125306	0.912834508	-1.179295001	4.604379859	4.451692714	0.499656641	-2.161692984	0.106069682	0.140067727	1.806386613	2.079900431	-0.243433588	1.072248088	0.414098479	1.165276061	-0.2857382	-0.321996832	-0.911339604	-0.574951145	0.060329878	-0.93267436	1.645193686	0.27314411	0.998421711	0.516494693	0.601467047	0.688254821	-1.143560937	-0.325224794	-0.271505137	0.579949226	0.401373116	0.903374597	0.087485477	0.031425415	0.492300366
6.954647945	2.070076464	-5.644470388	2.202432349	-1.164530292	1.128262036	-4.99662777	2.255507821	2.667143021	3.911068594	-1.89754452	0.156869572	0.365823989	-0.825889249	1.718876391	-2.997673102	-1.129760258	-0.089286296	-0.59911704	-0.449391126	-1.203625928	0.521532486	-1.307129002	1.520456487	0.382801736	1.8473271	0.81667158	-0.350621941	-0.625710989	1.589531849	-0.275045859	-0.560460568	-0.325080451	-0.140413309	-0.946704812	0.475525617	-0.401760691	-0.052534042	0.423433632	0.446137168
8.783741211	0.23919469	-10.66299335	1.638958319	0.523699489	4.549887587	-1.675894542	-0.164488014	0.649422878	1.54301046	-0.465631994	0.936873263	-1.385766705	-1.437918523	-0.44093303	-2.746374132	0.811750631	0.80452046	0.372861254	-0.8421724	0.299850185	-0.763181294	1.101506228	-0.550175204	1.405311708	0.325253328	1.78647896	1.420040957	1.008998775	-0.925557688	0.015893067	1.049728867	0.182847037	-0.476354589	0.009195359	0.336854481	0.205897392	-0.355094765	-0.604478651	-0.145776851
15.56538877	-0.754902997	0.411034589	-3.450988928	-2.069430886	-0.836975181	-0.433117444	1.434873681	2.897009406	-0.622187207	0.328769508	0.315246809	1.266431399	1.846531129	0.846633666	-0.468047724	-0.373414775	1.10931031	1.03782574	0.156918442	1.076349917	-1.589673486	-0.875765508	-1.496068602	0.90860131	-0.898656821	0.379655456	0.314695143	0.027624146	-0.321856524	-0.760584356	0.579287607	0.077939626	0.1573057	-0.046370513	1.199201285	-0.233523929	-0.343242886	0.328996528	0.068278588
3.67024219	13.40155722	6.533125865	3.551972051	-2.957547779	-0.751991459	-0.254962293	1.323044309	-0.326106882	-1.197108099	-1.992709128	-0.629715289	0.100346604	2.223179623	-0.151014476	0.606626392	-0.801685588	-0.019448782	0.546514195	1.023579141	0.326650334	-0.35167749	-1.056230295	-0.556323404	0.577622981	-0.646470096	-0.023015901	0.457775194	0.631605609	0.533973004	0.290967264	1.119277283	-0.526490951	-0.070889904	-0.040276528	0.664460159	0.076669909	-0.533667684	0.483374003	0.347646468
20.54703881	-10.06970441	2.605930006	-7.709290648	6.207236334	5.192942737	-1.245930536	-1.674920674	4.219772063	-2.636031911	1.457163657	-1.557620884	-2.370391483	2.764859911	-0.064055821	-2.869650143	2.099872733	0.012179481	-0.481852845	1.984286105	-1.56269551	1.386894472	-3.228792641	0.90554697	1.71045991	-1.069592693	-0.418659372	-1.057006025	-0.341521337	-0.989452325	-0.033437413	-0.523455398	0.225933237	-0.422438767	-0.170790121	-0.984052869	1.061089801	-0.267442172	-0.453525448	0.007484642
6.231547042	0.792869604	-0.185822745	-1.923799679	2.641789614	1.763562655	0.007430053	1.40701589	-1.752461517	0.589109388	-4.015655606	0.844416999	-0.580658722	-1.319005392	0.798794197	1.120271152	-1.727499206	0.702614372	1.272985847	-0.485912465	-0.289184892	-0.449348683	0.329532869	0.600820968	-0.033963467	-0.974092757	0.190062142	-1.038887758	-0.529365374	0.017036299	-0.162300616	-0.093597349	-0.209809126	0.088170219	-0.172141985	-0.370519286	0.026124447	0.219363718	0.414884248	0.089455424
19.3338581	-0.043945246	5.558901496	-2.555664231	-1.401087265	-0.632945039	0.042910149	-1.405410944	-0.033121492	0.079950753	2.86408187	-0.704659536	-0.828218872	0.300866591	-0.349386017	-0.36547627	0.173190255	-2.072574673	-0.313108955	0.262215944	-1.007162238	-0.901654567	0.21331468	-0.092518859	0.570874365	0.142784465	-0.20203917	0.127096554	0.167558833	-0.019505156	-0.024015003	-0.961068337	-0.34409205	-0.471698357	0.134022503	-0.4985491	0.048971474	-0.096551499	-0.064171832	0.491553214
-4.62886206	-9.884679712	4.785864595	3.327668729	1.641871396	0.82042485	1.902479001	2.931062768	2.756417785	0.701925111	-0.777399003	-1.205775517	0.401310321	-1.00272085	0.636078552	-0.332188016	-1.87601889	-0.133145245	1.301583408	1.271071706	-0.089586794	-0.434382175	-0.892493544	0.646910824	-0.489155226	0.278774008	-0.548444322	-0.0541377	1.292097902	-1.400041801	-0.02281063	-0.28612454	-0.419200188	-0.253169484	0.363622971	0.380818809	-0.108674664	-0.333498183	0.014953395	-0.640604223
8.028857557	-7.444437337	1.289097205	4.621238499	2.590545155	2.446885648	-0.371070217	-0.762530639	4.370590788	0.629835087	-1.281430874	-0.884570597	1.859027969	-1.164280332	2.522102601	-0.360992654	-0.195243219	-0.106963855	0.229182201	-0.201168254	-0.422790375	-0.302852744	0.083480551	1.178810388	-0.953465834	-0.168315787	-0.027460955	-0.019631033	0.892568335	-0.094947886	0.17966932	-0.17943264	0.198742969	0.954470423	-0.070138454	-0.311486623	-0.874433246	-0.294294002	-0.221136656	-0.577263491
3.667911853	-2.227211849	-1.746203351	-2.307848896	3.774520989	1.487195482	1.357613241	-0.928784436	0.859378057	0.126124085	-2.357920183	0.267550757	0.744217219	-0.339441785	1.398324376	0.427134117	0.813441561	0.264349039	0.257375531	0.01071038	-0.904524226	-0.692191634	0.650875474	0.832125141	0.43886531	0.107390129	0.328006184	1.201937334	0.633177896	0.191386087	-0.049763397	0.767404192	0.214478617	0.028521289	-0.017732333	0.182023334	0.084980264	0.124939341	-0.193174159	-0.077179662
10.46614112	-3.817739531	7.111981146	-0.587532541	-0.531737034	-2.128686591	-1.357418908	-0.725886402	4.419516179	1.664180415	1.216669341	-0.396000626	0.431706131	0.056965467	-0.165773204	0.605137682	0.040400215	-0.651594275	0.651971285	1.17819235	0.456135945	-1.308086568	1.177971546	-0.549326395	0.109459166	-0.308680568	0.271870554	0.170001221	-0.733301756	-0.380323833	0.350607848	-0.073403266	-0.034261629	-0.13426135	0.080678006	-0.016529478	0.006160034	-0.026035778	-0.100418922	-0.183696372
6.907518492	-7.77554674	6.961538876	-0.385517124	-0.653499268	1.027204386	-0.576629396	1.663032469	1.901532776	3.565945651	1.796178991	-0.470058049	0.626767269	-0.928157478	0.747785089	-0.614833548	-1.28076552	-0.103620898	1.042457862	0.482004663	0.640957182	-0.662425106	0.764576085	0.116327671	0.011002988	-1.366706542	0.165499094	-0.497470823	-0.948243352	-0.336954404	0.163368283	-0.093362362	0.247259402	0.73507996	0.025047662	-0.12554201	-0.108660402	-0.123387184	0.365311834	-0.307181259
9.456918685	0.089665547	8.142877372	-1.351779732	1.58343427	-1.315828759	-0.947987922	0.054226985	5.271104573	1.580570435	-0.297056796	-0.174624311	0.054916542	0.644584227	-0.623560304	0.166769129	-0.763395649	0.139551133	0.987094356	-0.006203073	-0.208193271	-1.270262038	0.488475562	-0.275758105	0.186485162	-1.025864972	-0.331266846	0.318209649	-0.051488033	0.116660388	-0.069276364	-0.040809669	0.583901552	0.022355813	-0.053718982	-0.357937348	0.495297655	0.117464749	-0.294747245	-0.448169743
-2.154248373	-9.212288027	5.84426501	-0.786875043	0.969050542	1.56129632	0.71797482	2.25752752	1.543991571	2.505193996	1.511740678	-1.15688791	0.705421715	1.060419201	1.998483976	-1.437166824	0.317190044	-0.370861149	0.709054414	0.108173044	-0.759365557	-0.622169015	-0.471188882	0.895012085	0.164375876	-0.026410186	0.876744959	-1.188310764	-0.257841224	-0.196871689	0.496511069	-0.222133768	-0.15047845	-0.154273657	0.214380693	0.210613325	-0.607065122	0.207213568	0.120090982	-0.22116743
4.25645684	-10.31084959	8.996240385	-4.951112302	1.069539825	4.319298779	2.733203113	0.110269088	1.5146732	-0.306528541	0.657811645	-1.496766388	1.332952755	0.273639331	-0.202131836	-0.46023485	-0.783339721	0.162926677	1.111695173	0.157977006	0.391092258	0.526604149	0.726378679	-0.458268245	-0.031234792	-0.112293723	-0.901575125	-0.562052612	-0.074713367	-0.604459202	0.267546435	-0.035621394	0.200297043	0.301185398	-0.060915947	-0.041497319	0.044953415	0.069190349	0.355640537	0.026948545
1.601281909	12.86235487	7.39395989	4.317169455	-4.469159621	-4.435847011	-1.266944105	1.20044041	0.277881024	0.792610249	0.844925466	-1.210268584	-0.858219572	-0.169119911	0.043709753	2.107739666	-1.733230858	0.928963212	-0.8434002	0.397925831	-1.975660166	0.641795698	1.535357567	-0.182209743	0.57025311	-0.948510275	-0.613611808	0.509894727	0.451211912	0.213750168	0.072292772	-0.016029395	1.212454287	0.40855792	0.495882313	-0.356275781	0.335464395	0.542627034	0.022462	0.040294816
-8.864383565	-12.88345897	14.65530526	13.15167586	2.199863147	-0.890488157	1.30234288	2.413256127	1.059694889	1.866124931	2.230137494	-2.534404337	0.821882705	-1.210427401	-0.283977603	-0.466498805	-0.570541627	1.370563769	0.695591765	0.982987302	-0.756110652	-1.016106935	-0.621507138	0.941106227	0.064529723	-0.564222762	-0.214851235	0.510435557	-0.824296918	-0.11739677	-0.056075262	-0.029162028	-0.173521288	0.167731877	-0.516821201	0.302396046	0.31800021	-0.055013353	-0.642086736	-0.407758879
5.885234323	-18.71915603	1.866997885	19.74921574	1.874791702	-2.058425365	-0.774125313	6.960906164	0.107228542	1.193627077	-1.30908537	-2.675383501	2.122267218	1.377718627	0.362975365	1.7776798	-2.487782689	2.496074917	-0.546915346	-1.510334876	-1.52630372	0.698858359	0.426585873	-1.341079346	0.533740611	-0.707766176	-1.913761044	-0.061173876	0.813331921	-0.352851396	-0.780267913	-0.692775139	0.226366158	-0.218510788	0.399519412	-0.340885826	0.878728774	-0.091786619	-0.715971571	-0.11065514
-3.21195954	-8.979453245	9.36225145	11.68368936	2.808359586	-4.252038906	1.687745203	1.666374554	1.382800121	-0.564801376	-1.150015448	-2.317528715	0.39239504	0.04297801	-0.502737804	0.944163626	-0.93450657	0.88352887	-0.245104703	-1.404718101	-2.638314142	-0.026842582	0.869327041	-0.068380562	0.688149304	-1.793256134	-0.386650873	1.037628584	-0.32900029	-0.144507482	-0.941191385	-0.238700762	1.107892217	0.343285158	-0.221907065	-0.282470558	0.976725538	0.835768062	-0.281093956	-0.326149478
1.220732348	0.048404334	0.83243506	-3.044936212	-0.794535933	-0.405284725	-3.254722664	1.977853678	0.038468344	0.56139219	3.899720985	-0.046832745	-0.916725566	-0.613399355	2.052251477	-1.083339117	-0.441281685	0.523746518	0.311640228	0.982426518	0.575420694	-0.634530842	0.08579003	0.593410997	-0.523111334	0.049753032	0.576005844	0.022370049	0.526011547	-0.522605301	0.496490599	-0.404285717	-0.232679793	-0.258648752	0.443431164	0.299760041	-0.19046239	0.471506641	-0.032707686	0.292228646
1.770731588	13.17606544	2.650911735	3.169132929	0.814980892	2.719753241	-0.215356412	1.15971339	1.859347503	0.919573103	-0.923817946	-1.011992579	0.633253677	0.997029364	-1.730230321	-2.236612036	0.330692517	-1.002085529	0.514614968	0.407555782	-0.508408447	-0.274066201	0.673138345	0.118102542	0.134771423	-0.922316039	-0.111421408	-0.809972552	-0.059969411	-0.016731009	-0.552662126	0.359854234	0.582418735	0.183524722	0.075277558	0.241653589	-1.062120541	0.101197197	-0.037676688	-0.43042107
-1.355973327	6.788244593	-0.89503964	-2.873052794	-3.356369639	3.266341702	-1.22740582	1.711589482	2.967284209	-0.675256833	0.489302775	0.83065329	0.306181294	-0.680010163	1.496382027	-0.800454412	0.933626308	0.278046314	0.2289564	0.637979063	0.1230773	0.069024745	-0.84803348	-1.252702449	-0.837539796	-0.413078332	-0.537934051	0.5998789	0.585448915	0.676435559	-0.427018018	0.448179773	-0.041917318	-0.204013827	-0.523503551	-0.132726462	0.230983162	-0.086180795	0.103047107	0.064464593
9.26155322	-7.278121452	0.130892657	0.512253587	4.194960278	1.862718728	1.75222853	1.329861032	-1.042660612	-2.801786962	-0.494971442	-0.378680891	0.467076548	-0.016890505	1.376872922	-3.051606165	1.13408753	-0.003559782	1.801864848	1.591809213	-1.159478164	-0.083991016	-1.609785707	0.485646854	0.188896585	-0.979190353	0.244867298	-0.079090609	0.165969511	-0.65090572	0.340130765	-0.361632576	-0.451774586	-0.648757197	-0.136790561	0.615094899	0.167221742	0.255241641	-0.374470227	-0.298231424
10.24304562	-10.40724984	-1.46579417	-1.601718551	4.362157258	4.151723644	-3.230762068	-0.517213757	-1.093776833	-0.030115179	-1.303064216	0.911479664	0.720206187	3.632999793	2.355833075	-0.464471068	-0.887369342	0.167422169	0.5701212	-0.217716126	0.65958209	-0.463458575	0.218891706	-0.284341159	0.202956413	-0.287278111	1.506036364	0.295534903	-0.542129894	-0.641922197	-0.241097546	-0.190738542	0.424408811	0.1145476	0.236991386	1.025793729	0.107259459	0.080065602	0.233931203	0.613444396
1.318629633	17.35557705	-1.993913368	0.120871961	-0.528801214	0.147911736	-2.542014258	2.854795638	-2.904589966	-0.131487996	-1.144377691	-0.420482795	0.373953434	0.361223395	0.738640552	1.539222883	1.464537813	0.309433566	-0.053323168	-0.285913684	-0.352652992	0.880768471	-1.850100957	-1.41308271	0.604680342	0.235746356	-1.18831349	-0.618526692	-0.221326557	0.264653635	0.055023578	-0.867963984	0.456704996	0.869010465	-0.371882509	0.268117512	-0.099646973	-0.068449293	0.114081186	-0.129471834
-2.165309264	21.65092945	11.26814015	9.617091425	2.412866873	-1.201925656	0.749509143	1.344087187	1.053165209	-0.393548787	-0.12981207	-0.868735984	-0.10495732	0.257265397	-1.826136436	0.574871799	0.820375418	0.327035516	0.372153249	-0.53118205	-0.543953022	0.28994374	-1.49293486	0.074012138	0.35362126	-0.298961765	-0.056337277	0.266878853	-0.274617395	-0.560138123	-0.121981899	-0.775952843	-0.415432053	0.194296961	0.386636639	0.088527436	0.261798668	-0.166299416	-0.28377301	-0.587904486
11.63350321	-5.16559104	4.805956977	-1.456815148	-2.236865509	0.255628846	-1.007931365	2.734044166	0.093432437	0.409556689	-0.253370324	-0.28159527	-0.914300726	0.932985331	1.075914545	1.226161625	-0.776545144	0.672092458	-0.099793756	-0.747073869	0.215510266	-1.898163418	0.308122032	-0.624368737	0.027228527	0.450695907	-0.087537518	-1.475052133	0.085178762	0.054218504	0.667536511	0.215459728	0.322448882	-0.283884297	0.825342402	-0.490081289	0.073683067	0.094124548	-0.303452243	0.216475624
4.858803656	13.23508852	-3.801316072	6.507776119	-0.235427093	2.886391613	-0.381488415	-0.554763087	-1.939144595	-0.334292495	-1.39626424	0.704616572	3.318856328	-2.531203129	1.151520628	-0.812962064	0.591406819	0.534067103	-0.602628655	0.610303981	0.962407372	-0.303047095	-2.10919802	-0.3843518	1.10440954	0.548812711	-1.024183253	0.793881403	0.500172845	-0.820514971	-0.228777353	-0.412377624	0.006332459	-0.396557178	-0.190323889	-0.283238003	0.016650875	0.513801375	0.095243028	0.649060153
3.580078587	1.876188405	2.190952775	5.429435694	-0.908200437	2.571799299	2.245781269	5.428318143	0.594693628	0.31629411	0.60709286	-1.569642696	-0.22054583	0.463556784	-2.675097306	-1.892528488	0.126579731	0.501922562	0.293723643	-1.868226475	1.029450613	-1.245903536	-0.49362777	0.439827163	0.491069975	0.223800832	1.547856719	-0.685402232	-1.624177881	-0.258761845	-0.92504184	0.396606307	0.459825109	-0.327378412	0.616126621	-0.228492895	-0.838813601	0.822405121	-0.172283574	0.716754459
13.36296272	-9.356848871	0.682767558	2.986274532	-0.147612528	4.070025342	-1.419884476	1.269754324	-3.856273305	-1.285730763	2.510509773	-0.810734556	0.609715291	-0.235819366	1.126266906	1.692483979	-0.260358408	-1.134688766	-0.066240753	-0.202935482	0.048319307	-0.1257826	-0.731976915	-1.506255908	0.244963001	0.531605112	-0.477577372	0.740461707	0.21540554	0.146779262	-0.425705986	0.247241638	-0.204854445	-0.556761244	-0.042186284	-0.465508796	0.005536231	0.718350063	0.120224571	0.081163729
5.505986434	-0.830419307	2.160942473	2.363170608	-0.276368271	0.564169951	-1.701864558	1.182288961	-0.669661682	-0.099512381	0.733265788	0.158444424	-2.726666627	0.456551904	0.86571242	0.67376797	-0.321487978	-0.859683528	1.745717141	1.095759963	-0.099648469	0.906834083	-0.615724601	1.279548225	0.799671168	0.194264952	0.187353598	-0.185920757	-0.918771394	-0.378628403	-0.731120571	0.430323293	0.322206891	-0.525552786	-0.9450493	-0.073051475	-0.078000773	0.345912374	-0.021624749	0.219584397
9.853886061	-3.502533403	0.003440483	-5.13603875	-0.585904351	0.983995718	1.34517304	-1.291656235	-1.365308956	0.095823273	-0.217050745	1.676014374	0.549382948	-0.888727646	1.049582452	-0.217700791	-0.014805289	-1.352749506	0.248197545	1.260886741	0.213352547	0.940209412	0.690652794	-1.075208691	-1.102182702	0.620123063	0.594576701	-0.195800578	-1.220629025	0.303142764	-1.260383066	0.163177127	-0.207746026	-0.320378081	-0.107765527	0.228832698	0.07426671	0.156876469	0.116498552	-0.03176991
-4.425338476	17.82593491	-6.901691215	-1.144071472	1.364189047	7.713408983	0.385735637	-0.706379477	0.127062439	-0.313928272	-1.399267356	-0.45938554	0.232723226	0.563440195	0.750270463	0.947427527	-0.429106038	1.154851223	-1.401398584	1.854517957	1.010578859	0.431972233	0.750618936	-0.678434395	0.949430095	-1.45881776	-1.155766872	-0.534482281	0.231652385	0.182526991	-0.860667486	0.063638693	-0.195805438	0.342658549	-0.176397299	-0.201857577	0.463458656	-0.157366235	-0.054777645	-0.000268762
12.50799362	-9.669004441	-0.656652839	-2.404576045	2.251362745	3.225638859	-2.065032647	2.152276158	0.685076637	-1.142046855	1.722826368	1.972380572	1.06142031	3.087622791	0.923524341	-0.747757967	0.817417591	0.440247656	-2.010792319	-0.586432583	-1.233460294	0.155325837	-0.306906956	-0.210919094	0.520536913	0.788543868	1.23157158	-0.731329155	-0.06471466	-0.676477158	-0.937276543	-1.175306621	0.323284601	0.512545218	-0.018905119	-0.067137557	0.111681543	-0.149892689	-0.359695905	0.30511576
9.65432814	2.689414792	-2.301836169	5.240280238	0.435951104	-3.013941427	-1.658067464	0.561841818	-2.723149155	-1.7979497	-0.962645814	-0.286637968	-0.093055905	1.250030404	1.753079931	-0.504773471	2.336871938	0.016104381	0.249838968	0.669509567	-0.126402393	-0.419588207	0.23782762	-0.596244899	0.498857198	1.73586213	-1.656942921	-0.343701443	0.51504711	-0.392697993	-0.072676413	-0.003906438	0.331119895	0.031804053	0.069075738	0.313171637	-0.319148478	-0.105508891	-0.007342905	-0.435982035
2.356901484	11.59644463	-0.72717447	4.05484573	1.392127646	-1.707862148	-1.103614175	1.566229848	-1.3487649	-1.147025587	-2.643282265	-0.578121362	1.238653596	1.993269907	-1.629319258	-0.942151357	1.025939824	0.750665568	-0.808706352	0.819191873	1.66269479	-0.306544357	-0.479969321	-0.169129655	-1.008248129	0.434794056	-0.500340581	-0.214545465	-0.400995803	1.325744291	0.375401988	0.558716212	1.237790389	-0.148746048	-0.011536088	0.213900068	-0.989307801	-0.137763003	-0.573753677	-0.153835458
-0.819388011	20.3395084	0.222898344	2.553450963	6.811276438	4.618442428	-2.791049806	3.774325825	-0.041889624	2.080435997	-2.805824993	-0.627870307	2.666681468	-1.125740322	0.191104889	-0.272157431	0.874910753	0.393190554	-0.65719424	-0.284574166	-0.638129305	1.171655465	-1.254249539	-0.811029402	0.202493005	0.55709882	-0.532175677	0.033294827	-0.434232701	-0.419364995	-0.193665918	-0.64462651	0.035106625	-0.259683065	-0.262366316	-0.852024028	0.594995112	-0.231244534	-0.166812841	-0.142625873
6.316011094	-2.751291004	4.353785892	-0.296935973	-5.151157828	-1.615846941	1.396620075	3.83205298	-0.197412676	-1.523808879	0.9768159	-0.992965046	1.69520338	-0.329017374	0.768453404	-2.515327815	-1.031164599	0.501028686	1.704006261	0.524898069	-0.068848966	0.29515201	0.201394363	0.431701442	0.28625771	0.041036278	0.714816832	0.157070328	-0.495454434	-0.285814065	-0.976912025	1.32797844	-0.043994894	-0.3240325	0.27140285	-0.206432836	-0.19968198	-0.443503478	-0.358063143	-0.094969458
12.82648886	-1.84998206	5.737665594	-0.822549688	-1.429620847	-0.035878916	1.676347957	-0.596012714	2.230108322	-0.764457944	-0.401074985	-0.238067588	-0.596713178	-0.186675923	-0.079648092	-0.431701812	-0.441571042	-0.841596424	-0.114539073	-0.403893263	-0.313370511	-0.599616369	0.683305392	0.423790709	0.096363309	0.00076913	-0.089066898	0.306362377	-0.442773899	-0.8043372	-0.049563117	0.116892458	-0.106567199	0.324376235	-0.414172408	0.117113609	-0.119057862	-0.076137639	0.270267519	0.465570711
3.338610526	-11.36754881	-1.096295507	-4.221426482	0.836249287	-1.6881824	2.192040182	1.278527007	0.412798222	-0.427754156	1.62489204	-0.87627157	-0.433416568	0.365879483	0.905973046	-0.056843947	0.971013032	-0.629224881	0.66128291	1.1953306	-0.359303099	-0.003164619	0.709411223	-0.593486443	-0.655609266	-0.9066961	-0.737993654	0.228242926	-1.024676909	0.05012979	-0.285586728	0.044788169	0.12124889	0.115491725	0.387888447	0.083830998	-0.182615073	0.020433672	0.270952906	0.594752816
8.264050417	-9.784701978	-5.975879897	4.797081724	2.349915985	-0.34398518	0.03473229	2.446853039	-0.28552717	0.798896882	-1.117661498	-0.498665077	-0.345620259	-0.67146513	-0.02513399	-1.252954784	-2.046538752	-0.533849168	0.660903017	-0.903534484	1.111719439	0.822410129	0.126663018	-0.6973783	0.892290134	-0.250806776	-0.472499171	0.225616242	-0.67043	-0.527334022	-0.580737263	0.055962059	-0.354641865	-0.211123577	0.067255559	-0.177318486	0.761568465	0.275575631	0.563850855	-0.739805227
10.0088271	-8.744321492	5.013558132	-2.65932879	1.695737141	0.391088057	-0.577430061	-0.57844764	3.510025949	-1.736342244	-1.039453748	-2.611154259	-0.26882339	-1.252848704	-1.389401448	1.360761725	1.911377371	0.285312591	1.853486939	1.274989045	-0.625634476	-0.18069969	0.590733516	0.667389196	-0.208388805	-0.021209527	0.000383534	0.465382206	-0.22383389	-0.280193412	0.352128585	0.24269851	0.048495406	0.031559844	-0.085600808	0.527449123	0.037217315	0.19515607	0.037274122	0.003672877
6.649200704	-8.922135585	5.786352559	-4.613736116	-0.731897679	1.050392378	1.556673613	3.487283557	1.102717991	-1.727112759	2.227168	-0.072684891	-1.176590375	-1.267329388	-0.245128593	1.232410222	0.326409866	0.893803507	-0.042908397	1.398873861	-0.188668287	-0.593904015	0.204028633	1.116171759	0.28196633	0.593237943	0.740719184	0.23736608	0.565896245	0.320586256	0.233392654	-0.054379782	-0.310853595	-0.414573272	-0.062199729	-0.418344097	-0.190514111	0.396019761	0.164920808	0.724170772
-1.437681951	5.919374152	4.472677197	2.459914197	2.005372972	0.140450232	1.029022822	0.482445804	3.982047671	1.332414894	-1.346087475	0.793700695	-0.561744923	-1.513381055	0.588329342	-1.056310054	1.020892853	2.872904079	0.008894608	-0.30599528	0.130683814	0.027097264	0.612999005	0.648138449	-0.570478323	0.459897069	0.281032422	0.051435414	-0.148838784	0.174724983	0.355104226	-0.057539307	-0.489323526	-0.4010378	0.756504952	-0.100296073	0.593255932	-0.514757693	0.283205573	0.158942324
11.96633032	5.80415799	5.924538014	-3.920686431	-0.198776373	0.882375091	-2.886336498	-1.554961656	1.338732069	1.406785764	-0.050659987	0.717787368	0.420917083	-0.176216845	0.061529237	-0.159312796	-0.548162936	-0.241537653	-0.00437682	-0.588883886	-0.048892386	-1.288536055	0.411754675	-0.888587063	0.215427242	0.098153886	-1.484190464	0.821363145	1.0642148	0.507832533	-0.53078064	-0.038978802	-0.915438358	0.758442073	-0.181265474	-0.305480612	0.628034445	0.240657664	0.082073031	-0.133782885
1.817434317	-3.453134126	1.006361491	-0.013536781	0.793966648	0.066814965	4.050463073	-3.579699744	-1.42338177	-0.061504759	0.001921838	0.077566829	-0.547324616	-0.968744834	0.453059393	-0.400535246	-0.379277763	0.293978461	1.51511837	-0.562408807	0.280970558	-0.845419187	0.88597678	-0.551363565	0.77723775	-0.528159404	-0.547501272	-0.235150861	0.409063422	-0.282957437	-0.329172985	0.586535889	-0.465278299	-0.195491659	-0.182826967	0.036457288	0.072202496	-0.205140551	0.496354073	0.140500447
9.855101107	-1.843686484	-1.18155281	-7.134129359	0.351761126	-0.999187773	0.730990201	-2.037561483	-1.127752204	0.76433286	-0.231487215	0.590030343	0.29699586	-0.273506085	0.382797406	-0.213199019	0.271789692	-0.537450206	-0.118999911	0.338874957	0.060218763	-0.08201741	1.201643585	-0.050781248	0.659859957	-0.273414006	-0.686302731	1.172164758	0.175558996	-0.045462431	-0.388272055	0.151868505	-0.656639136	-0.070551206	-0.366305754	0.430945958	0.388583567	0.032392255	-0.024652077	0.312980902
6.394118303	2.644244809	8.185645205	-4.465303224	0.392662105	-0.666497913	-2.643661554	1.713888783	-0.707470885	0.473252363	1.650762687	-0.797738805	0.011099921	0.69067293	-0.523969985	1.784453314	0.337805376	0.493547631	1.154954987	0.465800355	1.433439759	-1.000624766	0.006873597	0.295749529	0.480112245	0.416321431	-0.48469556	0.932065143	0.3279874	0.055451542	-0.336423006	0.667976829	-0.228599633	-0.187041732	0.18846948	-0.584678241	0.732378839	0.547234986	0.31979688	0.065253752
23.46325791	-7.864082202	1.358589726	-4.153792286	2.511820244	4.079657139	0.631174488	-1.36710396	2.295306921	-1.376312506	1.025075132	-0.890800175	-0.985328342	0.972068469	-0.202633539	-0.653942109	0.749300667	0.852862105	-0.171968563	0.046618553	-0.32186525	0.568644751	-0.606633203	-0.486891147	-0.887031737	-0.273777551	0.636732077	-0.14121938	-0.287160792	-0.50037694	-0.048907895	0.021035404	0.204327982	0.833389448	0.009511384	0.336319572	-0.107129908	-0.125155488	-0.001455807	-0.270578277
18.1496208	-0.554876703	2.894955386	-2.607971422	1.34047513	3.824041847	1.535531199	0.608669136	3.664249769	0.006497242	-0.768416727	-2.106046459	-1.899619711	0.722649108	0.756987728	-0.613902003	-0.079302467	0.578072848	-0.308538138	0.388666793	-0.527706714	-0.038542442	-0.350747416	0.097821479	-0.606714351	0.402382428	1.411224063	0.49009361	-0.560831938	-0.201025754	0.502387586	0.460101525	0.423828701	0.328668754	-0.218784022	0.494566626	-0.06434512	-0.102096654	0.095130227	-0.347366438
11.09827591	-6.943458486	-1.105583809	-2.309485075	0.153910538	1.206710718	3.351468143	-1.5510356	1.064703177	0.919977796	0.877880588	-1.37815831	-0.497261684	0.87312217	1.438041196	-1.006079267	0.351318678	-0.342672717	0.180847107	0.65741684	0.025607205	0.215276107	0.793113715	1.443123347	-0.686931609	0.661930969	0.841183985	-0.211552763	-0.234123555	-0.450641107	0.365808739	0.536880579	0.687567046	0.320236928	0.020706609	0.500018436	-0.298823755	-0.155192193	0.232726334	-0.319170508
-2.276575062	9.431175932	2.296172429	-3.166802673	-0.430658064	4.595767408	4.439111728	1.614942202	0.721277769	-0.848734827	2.896829992	-0.380000204	0.683474324	-0.107309913	1.677425816	0.421935428	-0.661785934	-0.061613296	-1.643545385	0.471718929	0.013246974	-1.449685769	1.455727704	-0.376055464	0.576570248	-0.563296153	0.108004877	0.252998612	0.767228648	-0.375583626	0.586414161	-0.204643824	-0.35408885	-0.117221026	0.071057982	0.260706223	-0.237666625	-0.14275942	-0.450063377	0.372160184
17.67808862	-16.11706352	-4.822139776	-3.630243934	-3.339032894	1.767976252	-1.332112141	3.768082858	0.632489307	1.764387534	2.589866532	-0.332833446	-0.031598531	0.778558559	-0.413431106	0.355818486	0.292181283	1.69754081	1.293415796	-0.526141126	-1.509802572	-0.599615063	-0.576656335	-0.65237237	-0.291938992	-0.123953086	1.037277257	0.638887366	-0.788597908	-0.277443119	-0.120003223	0.368572298	0.686982353	0.237016705	0.108775203	-0.404122105	0.436091973	0.404266119	0.037403699	-0.212574867
8.702165153	-4.394854843	6.392663945	-2.100741719	-0.400158744	0.26458774	0.459709346	3.290635414	2.845423214	-1.275175507	1.582324313	-0.520058515	-0.311913565	-2.708716461	0.072151608	1.400400581	0.443396708	-1.309534556	-0.10190168	-1.32666266	0.484851168	-1.812387677	-0.122074703	-0.12614172	0.981770147	-0.149213699	0.261998296	-0.228652218	0.425539033	-0.114696611	-0.297173039	1.188149175	0.560192507	0.428940084	0.568227344	0.248890264	0.041097212	-0.264331708	0.129375839	0.086755694
6.655895879	6.55825134	7.309968981	1.754968689	0.341192499	-0.240811672	1.974936802	0.44484701	0.113732757	-0.068649096	-1.890064108	-0.29041364	0.662854358	0.207959265	0.821888288	-0.621354378	1.249006806	0.972775642	-1.06404391	0.208205312	0.889350455	-0.522815614	-0.460260089	0.099869506	0.049483631	0.763984406	0.681290443	-0.516153821	-1.297382018	0.26648471	0.036333237	-0.61034466	0.211903924	-0.158398997	0.009323128	0.460700747	0.108877967	0.395052419	0.338089891	-0.107141483
3.150686499	-0.374304481	5.667889119	-3.276708797	-0.592515476	-5.823654467	3.639203882	0.110612061	1.805406451	0.572538482	-0.714055918	0.328468893	0.270581843	-0.80974564	0.521164536	0.621664982	0.122361174	0.482289898	-1.310576079	-1.352502789	0.169720356	-0.76794193	-0.387770845	-0.201970207	-0.010292515	0.357161325	0.099228672	0.405588515	0.332216229	0.263549769	0.539348195	-0.489796916	-0.06511752	0.365267359	-0.205055804	0.13093833	-0.505132726	-0.008594385	0.482184058	-0.263233692
3.555253145	-0.406841971	1.081042416	-2.751230158	2.386477817	-2.632958334	2.261451285	1.624241191	0.641827693	1.756554429	-0.567107458	3.310638081	-1.35037708	-0.785690711	-0.555024521	0.415414492	-0.508586496	1.339478742	-1.440722207	-0.494079791	0.368480756	0.156739263	0.872849827	-0.559141393	0.076401364	0.970653272	0.239432711	0.27608563	0.707074462	0.225619982	0.33970044	-0.162301084	-0.590810381	0.522113961	-0.254575077	0.429324559	-0.025851158	-0.581470882	0.264148863	-0.512249479
4.797934256	-1.506262814	11.3467502	-3.776218703	-0.847908802	1.017222791	-0.419746977	2.334064565	-0.830734676	0.892881826	1.076136998	-0.63673888	0.158403775	-2.277262379	1.034300636	-1.311347976	1.63471984	1.137633742	0.225931465	0.153561319	1.485157056	0.19858985	0.864912842	-0.45320507	0.046085725	1.414058441	1.147043996	-0.756290849	-0.385802308	-0.060881572	-0.081679554	-0.608560944	0.289132549	-0.660825776	0.905228138	-0.528552283	0.253408451	0.21943685	0.105699865	-0.346535733
5.843357315	-10.07054051	1.166230481	4.125226681	-2.920186697	-0.17202112	1.163192084	2.301958996	2.245933048	-0.850683326	-0.96593354	1.860145027	-0.925760009	-0.70430114	-1.650903724	0.340072095	-2.059931032	0.958346235	0.659388855	0.945110052	0.759356345	0.4714279	0.553413876	-0.931113458	0.181450794	0.310253647	0.330584609	-0.251026889	-0.100878355	-0.579481975	0.037642441	-0.415904249	0.648924566	0.178769896	0.574087427	0.120050073	-0.39655639	0.002606232	0.304673197	-0.109307612
-5.160895073	-0.009891397	-0.985133486	3.818015377	2.582827394	-1.379048331	6.233597293	0.413061078	0.897638715	2.052213483	0.677533657	3.319409971	-0.962668949	-1.114674511	-0.513896289	-1.025747749	1.317081111	0.670388962	-0.67969663	-2.2113389	0.546850205	-0.666275122	-0.285960671	-0.408661591	-1.04627022	-0.165512616	-0.172223721	-0.777261346	-0.093998123	-0.125666918	0.080403153	-0.131859281	0.644290248	-0.206785825	-0.106405812	-0.363718214	0.212851334	0.581993539	0.361214316	-0.629303075
-4.311604943	-0.240899427	3.763180335	3.872037142	-2.498013709	-4.441883002	-0.091953429	-0.810632429	0.391722305	-0.963534172	-0.959159676	0.278030836	1.298288145	-0.664683269	0.826521281	-0.422973352	0.429939632	0.495423027	-1.178283733	-1.398522704	0.529948304	-0.732789606	-0.309633925	0.473433173	-0.882091485	0.461320708	0.535536923	0.195363024	-0.337432056	0.327568246	0.175321629	-0.173643579	0.7245427	0.068328832	0.119632725	0.002649102	-0.07658331	0.545844218	0.033208464	0.287603865
-0.245069522	-2.335282938	2.304045641	-0.551878002	2.915390362	1.724312937	1.395726542	1.872772472	2.567228528	0.572865706	-2.677758421	1.345231721	-0.359591776	-1.214961773	-1.444770169	0.188850743	-0.149112383	0.600299974	-0.446906702	0.266737747	-0.102787929	0.500730982	-0.004391879	-0.165834525	-0.961198241	1.114500274	0.628854691	-0.231256336	0.400744541	0.024213844	-0.16182149	-0.661648951	-0.653942046	0.301833476	0.273148438	0.212921808	0.124464184	0.132596581	-0.227302555	-0.079884472
1.698396825	5.413342401	4.185896859	-3.572186169	1.125057376	-1.729551964	-0.66077527	2.632425267	-0.536340747	2.823638908	0.286817904	1.919562424	0.316071182	0.382900886	-0.87234935	-1.251329685	-0.77365661	-0.893220936	-0.353287448	-1.251789325	-0.035551742	-0.732337883	0.051637136	0.282446028	0.382414732	0.969542597	0.430044462	0.255684508	0.366990999	-0.262440095	-0.849731096	-0.362158974	0.746110195	0.681285149	0.059949412	0.042853109	0.019882545	0.284796124	-0.109649304	-0.074107033
6.528981364	-11.52459157	-3.438624259	3.687509602	6.496483404	-1.365746827	3.440805492	6.621271015	1.696512802	1.180909468	0.328444718	-0.555708995	-1.557254024	1.390191603	-1.630825816	-0.178078586	0.997175654	1.374969956	0.435890866	0.688508873	-0.993084294	-0.028087803	0.291723964	0.794912053	-0.941641221	0.327323877	1.211062467	-1.596066426	-0.39816072	-0.758567676	0.283347196	0.100900201	0.307779985	-0.204594805	-0.446758799	-0.535941725	0.064057061	-0.073675033	-0.350045966	0.358410966
4.971418481	-3.72640483	6.896342173	-1.085410309	-0.033634122	-1.173631949	2.050038422	1.634086261	4.322210283	1.842848774	2.019798272	0.179422364	-1.01899717	-0.855310808	-0.705761882	-0.757875529	0.954116472	0.700617932	-1.262090058	1.384537207	0.292059963	-0.891308743	-1.180774141	0.053804835	-0.453036146	0.925399924	0.442003602	-0.743885775	0.068067667	-0.254361772	-0.022963785	0.238459571	0.861230678	-0.474915582	-0.457146046	0.691356936	-0.185686751	0.237601942	-0.177092985	0.113618369
8.100587481	-5.447394613	3.112909587	-6.94836454	-0.590256469	1.547159204	2.627830183	0.807709968	3.364315286	0.392913067	0.161338327	-1.13488208	-1.865941796	0.024296438	0.301318773	-0.53317635	0.790432863	-0.235766364	-0.747109977	0.945033291	-0.430109692	0.934937131	-0.069617532	-0.288441248	0.253052249	0.292386501	-0.401609947	0.092903699	0.292774419	0.209531959	-0.050794256	-0.291693535	0.238914826	-0.534478151	-0.25434385	0.078977807	-0.020933656	0.007345381	-0.429248776	0.098350371
18.88607499	-4.056154668	-0.683035408	-5.398614734	0.000681736	-0.191327401	-0.326687072	-1.074872862	-2.472468165	0.623171616	0.968372493	-1.207186294	0.610734892	0.925714472	0.764020299	-0.033735605	0.35090594	0.794801191	-0.017506405	0.078300762	-0.232697274	-1.219434061	-1.233214347	0.48852009	0.575763895	-0.852497261	-0.550758407	-0.382586549	0.026108422	-0.494271755	0.45171863	0.215966013	-0.237546594	-0.07223566	0.419665592	-0.055053802	-0.205692797	-0.057646819	0.064613813	-0.300918699
10.91137346	-6.614991513	3.874699829	-2.425800154	-2.033045521	-0.869224593	-0.289144455	1.996223594	1.593250261	-0.464839865	2.982372333	0.308065789	-2.135232563	-2.902130112	0.368378022	0.671294749	-0.304801232	0.274147719	0.037824925	0.550027724	0.413518337	-1.794223745	0.349548958	-0.531242365	-0.8796498	0.712356455	0.778911327	-0.057080537	0.51874478	-0.177137256	0.283607494	-0.198122263	-0.294967496	-0.050504634	0.59009475	-0.213286631	-0.657804043	-0.502036253	-0.024171464	0.145356341
3.14517182	1.047832247	5.514137924	2.291220757	1.142517317	-2.638056529	0.175944758	-0.381033055	1.353514879	-1.231631736	-0.207314937	1.389700569	-0.308057857	-1.855520451	0.03409735	-0.46349958	0.122646076	0.053560507	0.709914778	0.499080085	0.029236302	0.90075296	-0.803192537	-1.233615345	0.078807185	1.070614098	0.507677162	-0.503770421	-0.361721307	0.200769878	-0.353367178	0.179848543	-0.387266596	-0.304194484	-0.021755971	0.087972272	-0.279818512	-0.117344707	0.436257703	0.212905706
13.29229273	-20.87724818	-1.348820411	2.856344804	-0.104565544	2.16706674	3.231191898	2.374980756	1.490680722	-0.521156137	1.946545147	-2.402034324	0.760533738	0.767457884	0.289059768	-2.934127634	-0.727759085	-0.588800957	-0.247277711	-1.219247788	-1.020958675	1.816831922	0.635940221	-0.590908057	-0.798496145	-0.138307762	-0.077631087	-0.178872128	-0.171700971	-0.135154564	-0.555712419	-0.590785544	0.588095131	-0.621299707	-0.54576774	0.862502544	0.182021224	-0.229926487	-0.196465141	-0.502662921
8.633258017	5.323076742	1.359044782	-3.059473586	-2.398790208	-1.958134923	0.153800781	1.659438578	2.348482241	-0.134007411	0.812759491	-0.340177859	-0.897410226	0.484210108	0.919035288	0.978917605	-0.340638247	0.072296003	-0.237045509	1.131174009	0.440074117	-1.646639655	1.366225945	0.752101697	-0.308688441	0.48777487	0.800725827	0.58381838	0.167406867	-0.31567297	-0.110057258	0.627871787	0.249655776	-0.39645811	-0.306962597	-0.14580945	-0.133901815	0.121457843	-0.673135734	0.270331258
10.51595303	-4.378360783	6.230646442	1.658935552	2.05984816	-0.450300499	-0.329551986	1.535226816	1.778375669	-1.947019415	0.453876788	-0.04825605	-1.381088755	-2.214411535	-1.489548454	-0.47317442	0.128292505	0.652099905	-0.711376531	1.112486936	0.612084356	-1.618316555	-0.999565506	-0.544820182	0.215983391	-0.347976724	0.810240539	-0.862627344	0.088703778	0.167700314	-0.037971769	0.374047372	0.145204477	-0.184780247	0.468880657	-0.358568446	-0.320971252	-0.155264917	-0.498342123	-0.859114714
-0.623250856	-8.150199609	-1.210722391	3.967748108	-0.913743174	1.118080302	-0.331702122	-1.184521248	1.40739314	1.138530734	2.684053186	-0.26926915	-2.371163668	0.959904234	1.264867886	-2.197643413	-0.702102176	0.16907403	-2.146923206	1.284536981	0.805057723	-0.297043405	-0.045143407	0.495221653	-0.13694215	0.369326087	1.608103686	-0.482322136	0.007665836	0.05623911	-0.214734994	-0.008577456	0.474164346	0.382634007	-0.604889979	-0.27339036	-1.183999901	0.396902001	0.309025953	0.094680217
9.904072903	1.106521825	-3.821600196	-4.7278006	-0.106999248	-0.053559969	-0.274452916	1.595082904	1.640964623	1.748765119	-0.079631355	-1.130998844	-2.385849466	2.178413367	0.560503378	0.283863188	-0.313235359	0.337727277	0.618426524	0.574446732	-0.231247716	-0.583183297	0.780239019	-0.128215075	-0.65736356	1.261444224	1.364527608	0.492412223	0.064233317	0.926451548	0.465265964	-0.356373131	0.525730843	-0.155611714	-0.224864387	0.428239065	0.059498599	0.334708252	-0.381046698	0.431368776
3.730581898	8.847624462	3.339271463	3.90324475	-0.221776275	0.686058106	-0.885714465	0.939964563	-0.173431372	1.700039704	-2.909858317	2.459082728	2.337234232	-0.686636166	-1.074032182	0.851181823	0.235211347	2.119896796	-0.869611267	1.001775802	1.11746603	1.36177321	-0.706319364	-0.035440056	1.136537225	0.211494652	-0.396872239	-0.175983208	0.283963332	-0.772556067	-0.561668597	-0.588567176	-0.000200593	0.039047384	0.059949796	0.000958755	0.032263849	0.517905511	-0.729604151	-0.532783629
6.693692578	3.070964619	0.883909213	6.160626593	1.006854804	1.397258386	2.06427092	1.689121137	-3.867139057	0.805501949	-0.645486178	-1.064370351	0.397218919	-1.839715254	-0.261974532	0.162941401	-2.603956173	1.292960241	0.867161164	1.363199228	1.578656523	-0.080124162	-1.228912444	-0.304945615	0.854052709	-0.640974776	-0.338639701	-0.435082631	0.417282625	-0.03239638	-0.124361451	0.03114746	0.539793503	-0.432692871	-0.341749729	0.585600064	0.221506164	0.022447256	-0.079129878	-0.025831408
8.229414204	-4.424098375	-6.614105372	-1.414273649	4.241440244	-3.323579996	0.883543292	0.379120539	-2.146602741	2.278499163	-0.490743818	-2.037944436	-1.944559849	0.361065379	-1.149351071	0.222196028	-0.3801031	1.544146771	3.15431123	1.024981253	-0.668114419	-1.234995565	0.358238626	-0.299823536	-0.648058939	-1.016484084	0.001721061	1.396453919	0.267502411	0.882728853	-0.713823302	0.609038329	0.53889758	-0.170561907	-0.761305602	0.247742457	0.3119164	0.035638971	-0.603289863	0.447226214
1.069796662	3.350462523	-3.225168325	-0.259569602	-1.789108918	0.0286653	1.898839196	1.292797183	-0.462779352	-0.936103482	1.284666793	0.782423768	-0.120780883	-0.15390305	1.22543136	0.834798653	1.118854414	0.775951187	-0.695765303	-0.460451305	-1.464845199	-0.902978881	2.397532714	0.321634201	1.07740388	-0.870076947	-0.854446278	0.284902978	-0.057398658	0.001301952	0.48051446	-0.892100082	-0.458923091	0.236531677	1.065286772	0.142117132	-0.340016427	0.084626784	0.135644456	-0.015543372
5.56657364	2.511702415	-3.4291501	-3.671032049	0.611013869	6.710594171	2.996360568	1.313108257	3.614786782	3.11988589	0.597050023	0.02302563	-0.12790618	0.887931641	-1.138357886	-0.163177876	-0.088455347	0.590026458	-1.760844823	-0.057696625	-0.147425872	0.258421462	0.926130607	-0.594147757	-0.594179074	0.602798929	-0.792509923	-0.717809759	-0.311872356	0.441935584	-0.394854528	-1.092668112	0.80993496	0.273035437	-0.727687239	0.407556249	0.334283226	-0.305856033	-0.422455662	-0.145617548
-8.95500116	-0.421709012	-8.686900231	2.291665925	0.622654175	4.636367863	-1.11733982	1.507646089	5.340314403	0.745323743	0.153022301	1.655948723	-2.747740448	-0.712860707	2.176619487	2.45256424	-0.212618459	-0.41975401	-1.703378428	-0.407776389	0.822732943	-0.96997281	0.154729356	1.479020629	-0.058930834	-0.802479915	-0.212626882	3.077302726	-0.504658443	-0.670258474	1.021678051	-1.121913261	0.045461301	-0.271397874	-0.029452575	-0.311427423	0.096328233	0.252069702	-0.053487415	-0.0077784
7.130730318	6.504042311	0.52801723	-2.494930171	-6.787474191	-2.700333878	-3.308574092	4.609856631	1.774242014	0.410088164	-1.194904411	0.329489728	-2.200898733	1.152534869	0.886513762	0.165731893	0.544706968	-0.3333988	-0.994403269	-0.151534975	-0.625978968	0.386604386	-0.385116089	0.247006549	-0.566825406	0.428673377	0.830219235	1.059999253	0.229577251	0.139676454	0.305741872	0.506540173	0.29362751	-0.303134041	-1.337908555	-0.692820942	-0.284736938	0.865523264	0.085753903	0.064482565
4.50203538	1.045161235	-3.287169327	-2.563137883	0.320028789	-2.69517836	2.213397071	4.878144698	-2.285775218	-0.60079472	-1.190083875	1.276195892	-0.178022325	1.164416328	0.841153736	-1.230082947	-1.27616153	0.716656574	0.032059486	2.597471138	0.524718383	0.816722402	-0.74366177	-0.43715691	0.269760349	-1.144299447	0.267551454	0.921809204	-0.079300104	-0.482445348	0.029257018	0.523283362	-0.029595668	-0.118300337	-0.207332811	-0.07034094	-0.050296159	0.262185287	0.076321898	-0.359250516
4.110325072	0.560558437	-7.645100583	3.213269974	-0.191319742	1.490266619	-0.217204697	2.54393573	1.349592023	1.79799814	0.131997337	-0.257206095	-1.043300925	1.810327769	-0.103789138	-0.187656476	-0.133179739	-0.970039754	1.880997272	1.034827468	-1.127776768	1.000754653	-0.450272657	1.737380255	0.62394048	-1.216468258	-0.600985479	-0.92744157	-1.00211617	0.129575521	0.251226108	0.119612069	0.46853369	-0.375227867	-0.133760338	0.04541446	0.518738394	0.016117912	-0.040488733	-0.591730238
15.43710823	-3.172648363	0.572376301	-2.11586565	8.288882858	2.765051263	-4.493395878	-1.201988464	5.479378309	-2.043610798	-2.040953118	0.812445917	0.293589984	0.632277028	-0.778388694	0.904195119	0.653216245	-0.951818157	-0.452208064	1.710739736	-0.334183812	0.586653627	-0.568251652	-0.528710754	0.042914108	0.083341668	0.360848806	-0.422244512	-0.681788727	-0.248206768	0.331036636	0.312050398	0.269335534	0.232722045	-0.189117657	0.312800647	0.541464793	0.286102003	0.139250308	-0.205781771
5.777345789	1.75833782	-0.282303481	6.295558595	0.388274754	2.285944793	-3.238196898	1.088007236	1.51827187	1.570999546	-1.208387775	-1.445167982	0.040028347	-2.578653655	1.190717627	-1.098779787	0.766005345	-1.151569034	0.786219979	0.188601713	0.338918403	-0.221988193	-0.878932126	-0.376243725	-1.090996333	1.360334212	0.862009009	-0.908551431	-1.134353778	0.59361728	0.072474409	-0.352292422	-0.02141628	0.211430038	-0.059036981	0.819186555	0.311023271	-0.274000889	0.003054	0.102158272
14.80091484	1.898500319	2.40427688	1.001136547	6.032223866	3.787444631	-2.494762927	2.351508726	2.944099796	-0.329041926	-2.50888415	-0.514261022	-0.353743821	-1.253581388	1.092197297	-0.882177265	-1.947031686	-0.52283063	0.71319048	-0.254460487	-0.599200383	0.413692356	0.279335075	0.751801273	0.606824773	-0.072623071	1.412661555	0.116326967	-0.197791727	-0.309005725	-0.371703134	-0.149921813	0.579686303	-0.139299572	-0.456911036	0.0916141	-0.12767299	-0.333842005	0.070005331	0.136302004
7.191306361	-23.8085406	1.316009553	3.851157702	3.194364642	-0.468258638	-2.827463053	1.301623896	2.377537025	-3.736896843	2.043527646	-2.996849234	1.046551597	2.196163833	-0.400153826	-0.087740266	-0.123137305	-1.201343727	-0.030046788	0.767028858	-0.349103575	0.685480326	-0.962513751	0.04833594	0.010626038	-1.302872402	-0.432880959	0.12992065	0.575986536	0.329232301	0.067830902	0.554336788	0.808177896	-0.681702744	-0.770856239	0.085599005	0.231344225	-0.334549071	-0.582633777	0.92640976
19.22111524	0.748854715	5.086304202	-0.982576734	-0.376474763	-1.157968558	0.486487485	-0.194430328	3.354525726	1.336772094	0.971484807	-0.923567633	-0.903978058	-0.168590788	-1.917164095	0.258065891	-0.295755063	-0.168082809	0.545652879	-0.428182149	-0.216099388	-0.271335556	0.745054686	0.152207871	-1.432694659	-1.029684957	0.074817464	0.074739302	0.132556125	0.035036344	0.341646089	-0.698720884	-0.496075474	0.084893402	0.569682183	0.617635442	-0.287317486	0.782938227	0.141303804	-0.301522126
16.14981633	-1.778757412	3.195171639	-0.504333074	-3.096972106	0.199820839	2.06184777	-1.704260052	1.825301081	1.012065128	1.66477578	-0.984322664	-0.443158085	0.622060985	-0.121055179	0.067187361	0.358199067	0.218321444	1.560993181	-0.778598988	-0.375314752	0.261203011	1.178950462	0.277621942	-1.303328117	-0.980571661	0.063004576	0.218211863	-0.018893654	-0.524288847	-0.185127128	-0.739105122	-0.12616503	-0.045521745	-0.084264573	-0.064432814	-0.989330435	0.564427931	0.058490618	-0.363321547
16.93292954	-4.994614979	-0.374276133	3.363069952	0.98830443	0.963298381	-0.737892393	-1.646599283	-1.515188367	1.386839286	-1.735502653	-1.425020318	0.779001181	-3.032187937	1.385491019	-1.290175635	-0.076270876	0.706088871	-0.497426468	-0.114486775	0.737843358	0.04066483	0.055542313	-1.13879779	-0.978627499	-0.17895871	-0.912846245	-0.408961528	0.26989673	-0.370724845	0.291390871	0.696131501	0.230769868	-0.323250028	-0.09042901	-0.291751929	-0.301963661	-0.254116678	0.139316597	-0.263273692
17.61301098	-9.354767744	0.591711445	6.515665552	4.30567518	0.777012606	-4.600641369	1.413765125	3.6905588	0.270660009	0.255868016	0.624704863	0.132223016	1.978671528	-1.431832163	-0.544534666	-1.362014495	0.627507511	-0.372766582	-0.665068785	-1.026217603	0.843181649	-0.427710485	-0.625442926	-0.003396906	0.087568875	1.246133427	0.424621633	0.483430289	-0.677406713	-1.597859127	-0.533633443	0.228303332	0.017706194	-0.610409506	-0.518629034	-0.161713398	0.131666514	-0.39641862	0.150541281
1.211650293	-1.772056863	-8.428087739	-1.972661752	-0.214365016	3.048072352	1.427528763	2.00789961	1.908973875	1.46089712	0.642862091	0.793467633	-0.858133699	0.684055282	-0.15199697	-1.681618276	0.609977413	-2.078923863	0.428973519	1.036156747	2.039076557	1.258579977	-0.721509482	0.772012036	0.991215453	-0.313485001	-1.078213258	-0.264292187	-0.346389029	-0.273236248	0.559508307	-0.403302206	0.446013432	0.270642461	-0.51025921	0.228578009	0.079200419	0.749159044	0.025548954	-0.267317036
27.83840466	-7.87151921	-3.2184646	-2.046737067	8.354071588	5.681240863	-4.944802744	-6.889866586	2.532025752	-2.1994278	3.104552087	0.62310066	-3.067981353	3.448945692	1.856719402	-3.546742564	3.527934752	-0.902586743	-1.694562785	1.576363205	0.907357061	0.439068733	-2.470554388	-0.027283012	1.670176799	-0.575463587	-1.193663886	-0.63997155	0.708990183	-1.037322825	0.830557862	-0.420955975	-0.075122164	-0.585787698	1.243579157	-1.400830586	1.178022721	-0.651346424	0.659376478	1.181825295
9.561624115	18.07333833	13.12843306	10.6306784	-3.351684749	0.064376483	0.97927521	-0.235837771	-3.297229852	3.486330551	1.354756345	1.19542706	-2.077493774	0.7463616	2.206080015	1.430513055	-2.141837289	-1.598499395	-1.657030952	1.256987498	-1.837013343	0.372488223	-0.602125078	-0.826568231	-0.451181794	-0.534728159	-1.542949807	0.882966719	-0.422843072	-0.405543419	0.754337268	-0.815540676	0.03039974	-0.310200354	0.375620451	0.535005073	0.538708178	-0.091101282	0.040005099	-0.095135735
-2.269260699	10.34307593	5.478411205	3.311274081	-5.637266055	-0.042801543	-0.102203841	2.15308187	0.159343019	-0.081778532	2.574344978	-0.72592564	1.239503502	1.209608124	-0.702828564	-1.054813787	-0.711856392	-0.101401848	-0.415550858	-1.007277143	0.400204727	0.590124288	0.812539308	-0.313633255	-0.478593175	-0.46773283	-0.384522709	-0.884179787	0.280999987	-0.352546209	0.117865865	0.419688614	0.156587523	-0.266739713	-0.260329289	0.003254085	-0.058080759	-0.247808755	0.521075663	0.217577407
4.981587019	1.495634682	5.801265622	0.581093457	-1.888046444	-0.535782392	0.729756169	1.061463178	0.634886043	-1.095975331	1.601473142	1.913521695	0.35680947	-1.525898321	0.419936622	-0.235242245	-1.61960847	0.028560773	-1.10013554	1.503346339	-0.209296481	0.250697631	0.210790736	0.690551773	-0.376019269	-0.853413991	-1.043736201	0.560059729	0.134374618	-0.381869489	0.454988244	-0.223183492	-0.035892155	0.926817001	0.242237296	0.555216183	-0.019281871	0.066225166	0.157157259	-0.061388896
5.305229361	9.6650725	-0.71338094	-1.694797106	0.693707944	5.287698037	2.228396653	-2.82612764	-4.177175401	-2.574866066	-2.012795528	0.227901607	2.210553321	0.371959572	0.760661621	-0.678483689	0.05658065	-0.314617059	0.328177754	0.560299359	-0.252721123	-1.18520633	-1.017815954	1.337503549	-1.209210593	-0.934628239	0.90561406	0.715959195	-1.023891279	0.176110086	0.05818669	0.856300391	0.288774533	0.072182457	0.159208356	0.20740013	0.220251564	0.167662727	-0.262530994	-0.085869847
1.286381643	-5.870946485	3.81218368	-3.293224548	-3.251053769	1.499126418	-2.836917665	3.433257667	1.038272576	0.07208893	2.407131831	1.213756329	-1.046967496	0.454905942	1.331081744	-1.902403494	-0.99697975	0.77294148	0.807310205	-0.691448805	-0.37958985	-0.101165281	1.074548371	0.027418007	-0.651947619	-0.939606353	0.805625463	0.966606079	1.055477283	0.643136791	0.449790606	-0.007344954	0.1054375	-0.272043745	0.655440123	0.255497856	0.106557683	0.32648603	0.123619898	-0.472300137
15.98329406	-7.779761997	0.037808276	0.479305531	-4.130600966	1.488334569	1.886053841	0.826710235	-1.671384543	-0.922798497	-0.615021096	0.522736605	0.416318344	-0.869353877	-0.175500486	-0.555555977	-1.58875245	0.124042375	-0.554911516	-0.797813876	-1.015324464	0.362785532	-0.495773809	-1.640456307	-0.132620374	0.989860127	-1.084360069	0.888926631	0.400767555	-0.149500784	0.086024203	-0.022842602	-0.673338954	-0.067867895	0.86859519	0.350059961	-0.280407229	-0.122641448	-0.053038245	0.126217476
13.17254129	0.135664255	0.357580919	-2.343957851	1.968873227	-0.000834084	-3.127035593	-2.760445696	4.993653457	-0.570087562	0.379545056	0.907236595	-1.378679766	0.617567325	1.019016207	2.119042002	0.433964636	-0.236909305	-0.697145141	0.551447407	0.557098472	-0.385350558	0.169468062	0.373596711	-0.193268513	0.690277851	0.02646233	-0.624483051	0.301209632	0.21264453	0.024422419	-0.047716551	0.134582209	0.120947586	-0.671939936	0.327706324	0.392122703	-0.083827198	0.185520355	0.105785252
9.112464964	-1.455191147	-14.00185688	1.535574363	-3.570182897	-3.745547414	-1.437483795	4.758504992	3.782147833	0.739017625	-1.642258469	2.274640228	-2.422039056	-0.677655031	0.187089034	1.124942869	0.018353012	-0.533029298	1.887646137	0.63356455	0.002904148	-1.757894658	1.18682562	0.976649694	-1.078539804	-1.074573163	-0.181430406	-0.435570153	-1.047613153	-1.029884092	-0.59761306	-0.365147752	0.378788651	0.485718231	-0.368511583	-0.311739027	0.557183323	0.224075249	0.220902892	0.723849001
12.52386501	5.590734091	4.04245263	-0.314218808	-2.491293381	-2.844730284	-2.097077801	-0.040341493	1.853326	1.270964228	-1.676363126	0.34702128	-0.368790193	1.953888714	-0.909589713	1.386779816	-1.025261496	-0.607868362	0.787053918	1.938246661	0.559181014	-0.788619808	0.674780442	1.432429895	-0.474636867	0.533258196	1.080708998	-0.161396207	-0.522093865	-1.19586346	0.369286013	-0.563608092	-0.321676052	-0.044993309	-0.778624807	0.47015917	-0.044031536	0.033984013	0.23051445	0.210567004
-5.934790735	-8.598257507	-13.85959196	5.302345235	-2.906811008	-1.836962178	1.653550974	-0.117823165	4.570340532	0.796438366	-0.532694606	2.566943786	1.063215095	1.199118287	2.597211631	2.702819361	1.919720808	-1.194857203	-0.604768257	0.254208964	-0.177611681	-1.637503366	0.08112922	1.082979228	-1.759891932	0.736572156	0.190950604	-0.022989885	-0.544526767	-1.210599596	-0.780223937	0.249177907	1.166720324	0.213067716	-0.184969081	-0.311373361	-0.286523556	-0.480781261	-0.39479112	-0.394649879
4.215905782	4.473268997	2.339620078	-0.79214412	1.012142046	3.054807367	-4.704670566	-0.122023765	1.183199689	-2.560322168	-0.092782203	1.855391543	0.234898948	-0.025404265	-1.053570017	0.385658043	0.55249458	1.363552093	2.218520015	0.950392278	2.617615575	-0.158128865	-1.165514415	0.170108954	0.159268193	-1.180290684	0.0675263	1.18826525	-0.235895048	0.491951705	0.313615173	-0.672181345	0.566486409	-0.602459111	-0.3531633	-0.101967062	-0.191234473	0.264868705	-0.059511137	-0.118649659
19.24373942	-4.024766684	4.082203861	-1.326200293	-1.979837126	0.53548375	-0.08876193	3.037599549	-0.159502187	-0.188645463	1.007523618	-1.761949868	-2.543400981	-1.658969956	-0.034425677	-0.160725983	-1.332078389	0.235021175	-1.207573681	0.703293404	0.686916254	-1.317006601	-0.283622115	0.094358653	0.239870766	-0.261196248	-0.59920827	-1.188588327	-0.175310144	-0.021997349	0.037369609	0.408396885	-0.055416909	-0.132242086	0.646854612	-0.953817493	0.090309817	-0.118813188	-0.134444329	0.015817817
18.00678507	-6.246719936	-1.059947059	-2.899851303	-4.178807764	-0.770797389	-0.65959499	2.382798635	2.449272563	1.977757961	2.431649039	-1.708917463	-0.117314552	-1.265456404	0.583299724	0.006767125	0.632333046	-0.37672789	1.102450486	0.722780996	0.783804231	-1.415618509	0.167723857	-0.441411144	1.248495026	0.244108641	-0.47979376	-0.419819841	-0.120476749	-0.276534164	0.03168949	0.381126273	0.274649283	-0.559901705	0.233283081	-0.901901186	-0.002447568	0.168530428	0.140727723	0.466570948
8.828585267	-5.747071125	0.548035713	0.596112115	-4.111271723	-0.241916175	-3.382252901	5.424959654	0.185951351	-3.535263603	0.524724301	-0.599229398	-1.845393276	0.919531078	1.55136591	0.675846541	1.965261112	1.588028883	2.018761457	0.130714422	-1.052077826	-1.168422086	-0.730848469	0.313752271	0.944761882	0.325664869	0.490036592	0.514508437	-0.129724327	0.08189473	-0.162917497	-0.570324982	0.06872407	-1.079462254	-0.081998602	0.610587921	-0.0500719	0.469164156	-0.326252633	-0.294558365
7.29008549	21.76787025	-6.242118614	8.987784723	3.137926265	2.019040616	-3.959085321	-4.537375411	-1.08840108	0.88310804	2.761648939	2.19887796	-2.817528267	1.642331656	0.072304845	-0.212587805	0.347701369	-1.198968946	0.745416442	-0.934449562	-0.436226862	-1.371679023	1.783091881	-1.503806386	-0.713504466	-0.871691969	-0.343787909	-0.484379829	0.652179646	-0.389268529	-0.091749637	-0.258691704	-0.224522121	-0.284835382	-0.863094323	-0.730013587	-0.207295728	0.652350114	0.204150032	0.13646055
3.796011758	-6.791747234	-5.050279665	10.6968821	1.431838648	-3.568020475	-0.958566756	1.668975237	-0.440503682	-1.657970975	-2.33158742	0.805084139	0.743252483	-0.358570009	-0.448550674	1.140969774	-2.450373453	1.21164224	0.870901735	0.515254783	1.093793111	0.795181094	1.911820205	1.411484702	0.946476136	-0.482879438	-0.217094838	-0.170958744	-0.776210505	-0.200926902	0.675104495	0.769622709	-0.268196671	-0.376343117	-0.711853225	0.28556346	0.289410093	0.349665528	0.887986371	0.579736912
0.489313374	13.28516221	-5.151158073	8.948335823	3.105077521	8.934376637	-4.897742617	1.86574225	0.581283982	1.293441977	-1.197497106	-0.960982308	-0.314507825	-1.403695254	-1.736842353	-0.923582658	0.803921603	-0.082381432	-1.016644981	0.203184946	0.960448037	1.430572561	1.367127792	-0.602205471	-0.302598387	-0.277476233	0.838309502	1.069101771	-0.593568103	-1.492615499	0.099394226	0.169653749	0.819899331	0.295948075	-0.098602576	-0.432943313	-0.036478397	0.460445055	0.266891159	-0.878319646
1.782056019	-4.711590381	-1.301744177	-1.285136546	1.039995523	-0.844674853	3.103067555	-0.829030521	1.517681315	1.02633743	-0.220623786	-0.14143507	-0.913173869	-2.397413285	1.162356325	-0.714878964	-0.016798693	-0.140798167	0.045511003	0.16909071	0.829489238	0.135933015	1.109057135	0.083688099	-0.624447596	-0.833353132	-0.18748048	0.122031957	0.029032007	-0.724798584	-0.18161034	-0.394340805	-0.753236645	0.119281312	-0.16112728	0.137626109	0.422673051	0.209890519	0.029421193	0.069285663
12.40245362	15.25341892	3.817877436	6.178240162	-1.073724231	-0.748545815	-2.676422885	0.234132246	-1.13547738	1.769180458	-1.289312823	-0.751289599	1.475112422	-0.905062702	-0.323244009	-1.251990193	-0.535451186	-2.245477061	0.469703021	1.08576275	-1.590751054	0.510129551	-0.407643204	1.556369423	0.055369681	-1.072118813	-1.508366308	0.819464077	-0.124411095	-1.089264616	0.261787994	0.771036953	-0.162785987	-0.261010553	0.314577602	0.196138993	-0.603974226	0.447264912	0.273820406	0.163629298
8.436991667	11.45470006	2.432174465	-3.998689509	1.683542034	-0.476397993	-1.379819913	-0.610840231	0.470091115	-1.094615435	-0.775565891	0.271084685	1.649793264	1.557525339	3.045470609	0.750794708	-0.645881497	0.287736712	1.421747103	0.649720684	0.306751854	0.18901446	0.427323841	0.630149309	-0.181753687	-1.126065425	-0.237860275	-0.574864985	-1.079428584	-0.368770504	-0.664058454	0.170732842	0.041076787	0.188971321	-0.013004663	-0.445321135	-0.259274373	0.227334843	0.44065273	0.242641435
14.55874073	12.8147425	3.161225215	1.90226493	1.760551843	-0.475298136	-1.221546035	1.548140312	-0.897432617	-0.820553855	-2.415052083	0.001733095	-0.004274328	-0.589771516	-0.114473442	-2.09097893	-0.658641925	0.595575888	1.357615063	0.595343786	0.070245014	-0.984979896	-0.51066348	1.499578338	-0.733980536	-0.574690395	-0.316811402	0.222353583	0.783723358	0.591140856	0.427617353	0.27704942	-0.237950395	-0.027303739	-0.05324358	-0.653543305	0.844894388	0.246462657	0.12975433	0.100821887
8.600878458	3.500967712	-0.89116145	-3.069472352	-1.575529732	-0.156419419	0.036940824	2.716080032	2.541366074	0.626284912	0.127837664	1.787460621	0.782836236	1.103288459	1.826594529	0.816543202	-0.961120723	-1.526360489	-0.110815245	-0.724908905	-0.246133717	-0.89586063	-0.419693804	0.070962828	-0.753804212	-0.977025209	0.10021879	-0.260508053	-0.750175387	0.259330172	-0.080505912	0.546042724	-0.451122738	0.196374142	-0.573306444	-0.256474896	0.697818376	-0.14490364	0.10866931	0.166080857
8.833450713	-12.76668848	-5.812205917	7.938516612	3.519559814	0.481815219	-4.563015936	-1.060978151	4.449017599	-1.577251035	0.918933187	0.523255346	-2.340293845	2.146447367	0.556808217	-0.007913628	0.03061663	-0.877003942	0.288057893	0.407329953	0.536070191	-0.189952931	-0.593133078	0.97576029	1.382766391	0.350234794	1.770890744	-0.647698872	-0.358225668	-0.552979454	-0.13878013	-0.274520074	-0.541029675	0.024433283	-0.445985367	1.115799755	0.941897269	0.002038131	-0.4411645	-0.825986423
9.829601985	-10.55878756	-0.022671771	2.519890786	5.375747063	2.377683156	-1.320435613	0.647699673	4.295916465	-0.523323464	-0.64302364	0.770367498	-0.073338019	-0.112074227	0.704573927	-1.729480312	-0.498265492	-0.768402877	1.077773302	1.101506568	-0.140238657	-0.422552123	1.263504923	-0.060625287	1.166000161	-1.490669591	-0.260036335	0.521111707	0.901694538	-0.427382803	0.526677378	-0.297634461	-0.162878815	0.066704213	0.07496778	0.302285425	0.946736333	-0.083313777	-0.100559324	-0.153653217
9.479748369	-5.373012626	-4.177705024	10.5797559	0.990558721	0.367234407	-1.725143999	0.968280752	2.682103877	-0.13699597	0.42058377	-0.87431264	-1.636828162	1.700208456	4.17075618	-0.925786386	0.206225505	-2.036689061	-1.62048291	-0.490249844	-0.293797103	-0.353767243	0.168416511	0.206757827	-0.639232902	-0.878182686	0.077328695	-0.319435873	1.296607774	0.548642342	0.317618221	-0.707205101	-0.585554591	1.064560811	-0.564327947	0.457337946	-0.097260681	0.524545824	-0.029102809	-0.458333012
5.425486	-3.818219596	3.946317683	1.450258952	1.590406711	-3.738643763	1.166693926	0.1269487	0.183510557	-0.482366819	-1.055812566	-1.147631816	-1.932692634	0.523744159	2.342130389	-1.936223639	1.009154116	0.411835817	-0.497935023	0.279730233	0.10729887	0.56232202	1.59802544	-0.380903596	0.019385532	-0.390575896	-0.105592555	-0.05221127	-0.15132819	-0.636241245	-0.19421139	-0.277877287	-1.57597068	0.207055728	-0.061683322	0.301912219	-0.741903074	-0.669715181	0.273248267	0.016881907
17.56071986	-9.526465932	-2.886006185	-2.433378305	1.725816481	2.32408368	0.91713943	1.443910567	0.737410793	-0.102436702	1.049899538	0.999127496	0.211677973	-0.275122582	0.258921119	-0.396028709	-0.160486758	-0.360501387	0.259611401	-1.545319293	-0.245431659	-0.558177244	-0.464186911	-2.122783736	1.545782125	0.531219595	0.198722853	0.102613895	0.050506698	0.0119665	0.720787016	-0.591331373	-0.331249773	0.175409746	0.709873146	-0.246331704	-0.0467262	-0.669186205	-0.532694385	-0.336754326
7.924842213	2.603330588	-4.883021098	1.818064758	2.294748395	1.117738396	-0.10872695	1.096127565	-2.136729692	0.330907637	-2.15702228	2.59574677	1.958981903	-0.910805196	0.693072141	-2.297148246	-0.345134452	0.864968648	0.506819733	0.325879892	-0.134693416	-0.569787832	0.226237915	0.059702739	0.968099065	0.502878096	-0.5653633	-0.005981485	0.205578287	0.196319334	0.315881508	0.333281069	-0.658092079	-0.039921989	0.281793708	0.146294908	-0.146248966	0.70333353	-0.235774495	-0.568386584
17.11258967	-5.175200185	-8.08906573	10.00309944	2.040222742	0.383947059	-3.282533696	1.343360507	3.499156088	-2.906572906	-0.034013213	0.386708212	-2.593036397	0.860049523	1.074240658	0.194741815	0.980732419	0.916088527	2.200747102	-0.28157719	-1.822703941	-0.790452414	-1.15516116	0.443389381	0.557628464	-1.525372872	-0.916949503	-0.081767693	0.105377486	-0.56423348	0.874840265	-0.063834559	-0.999576107	-0.803794468	-0.018272317	-0.629127088	0.804210527	0.180069077	0.624180397	0.288035585
14.90402195	-6.673876545	1.234038419	5.892342371	3.588479233	0.983950655	-0.286488251	1.452753083	2.752240596	-1.880325182	-0.782050327	-0.314258041	-2.251531332	-0.14465387	1.286951553	-0.849442347	1.48976224	0.590583505	-1.428399132	2.187766329	0.9477827	-0.695286056	1.172860206	0.006889281	0.027589272	0.791182542	0.975678437	0.258495295	0.405053592	-0.406515922	0.050350364	0.087098206	-0.162705864	0.088159906	-0.359796501	0.074134673	-0.48428004	-0.435604602	-0.649275894	-0.336457839
13.48490594	-5.55387076	-0.150743542	4.26695988	0.929486014	-3.591023083	-1.652094813	0.133392124	-0.464920531	0.485758612	-2.604920812	0.710558771	1.711648988	-0.764651773	0.701407489	0.647877737	-2.781573002	1.838989949	-1.539184762	1.806518759	0.595294009	-0.67769897	0.942945981	-0.83420256	0.722515887	-0.932251355	-1.638889313	0.535925159	1.091919508	0.188287853	-0.084814907	-0.249563295	-1.091437961	0.075337763	-0.186058813	-0.515178564	0.805707856	0.226891526	0.007427834	-0.139407538
14.16425271	2.309591795	3.688671927	1.380887745	-3.268918674	2.692849961	-1.718546573	2.285534467	0.17953064	0.733817817	0.143387162	-0.571316779	0.716955423	0.380612603	0.307585899	0.208323101	-1.289411931	0.940597496	1.754637275	1.31695141	1.538337885	-1.173857799	1.292765669	-0.344782728	1.96457156	-0.888680943	-0.038890967	0.569304177	1.268195568	-0.08408374	-0.063653184	0.022996215	-0.414864862	0.004880159	-0.456435323	-0.531708198	0.435658793	-0.373038058	0.153949342	-0.29493328
-4.560844337	-6.39370277	-0.000122676	4.593862932	-0.70717694	8.049513539	1.951450733	0.104123251	-0.499000313	1.557879632	0.178064527	-0.109474198	1.63675997	1.28104864	0.970605608	1.112173457	-0.544932111	-1.168394992	-0.607836968	-0.49339763	0.091052164	-1.004292066	0.560541117	-0.01807168	0.393404797	-0.489394619	-0.16684635	0.783825466	0.467854924	-0.677120461	0.447428087	-1.146458976	0.191372825	0.114128862	0.0049404	0.932356183	-0.447681994	-0.224606539	0.036017306	-0.133138437
3.183310195	2.62067622	4.036222422	2.581685042	2.466722095	-1.493810799	0.259805708	1.04959976	4.673096289	1.496298407	-0.286818398	1.795308091	-1.076629211	-0.040179347	-1.269023276	-1.597309358	-2.075952746	0.44547983	0.302503043	0.079883635	-0.555069605	0.050166799	0.609084809	-1.081344293	-0.402128282	1.247801597	-1.069674322	0.423033249	-0.336883983	-0.219084202	-0.489168209	0.073392609	0.030722287	0.049896111	0.6586555	-0.137195728	-0.050889824	-0.308543497	0.391020243	-0.230971483
-4.853894136	-13.04312235	-4.538293499	1.249184489	0.459554343	0.446957953	1.907090467	0.44537391	-0.419843594	-2.475816025	0.184324461	4.283393808	-1.561501728	-0.255567317	0.544814404	-0.266792381	0.391140781	0.354215316	-2.813181939	-0.980327761	-0.698378864	0.007881225	-1.207788282	-1.114779673	-1.695136117	0.664933571	-1.712544169	0.096333075	0.045647751	0.637277064	0.250386018	0.278767352	-0.257968806	0.242899668	-0.426541492	-0.7129082	-0.760224683	-0.678349802	-0.164815183	-0.283928758
8.358725556	-14.64274368	-1.452763917	1.182460417	-1.330520556	0.901815845	2.286638222	4.257519112	0.866940603	1.176387591	2.492819161	1.830520236	1.921119883	-1.313252033	0.607301157	-0.227444203	-1.571576301	-0.629826416	0.509507402	-1.1048987	-1.081121098	0.069628144	-0.175410029	0.600717985	0.481604579	-0.088698162	-1.111375806	-0.883005151	-0.583010541	0.121891955	-0.401144499	0.956208764	-0.094682325	-0.962705569	0.019335382	0.35915821	0.329953105	0.08469591	0.394702427	0.610839895
19.23472877	-7.632271317	-1.15232745	-3.159221168	1.568727198	2.668602195	1.710116384	0.058127269	-0.458068333	1.23781867	-0.432048698	-1.158341928	0.068547475	-1.663512403	-1.486471934	0.452989974	0.388067016	0.315291585	-0.608816312	-2.060081966	-1.425715404	-0.502567783	0.764828243	-0.926242303	-0.197479757	-0.412215202	-0.300269182	-0.487248994	0.268691705	0.296699592	0.143062183	0.416472583	-0.172972917	0.06410652	0.581934507	-0.051215431	0.23342712	-0.006076323	-0.38454796	0.079423009
13.18333278	-11.21805731	-7.212342588	5.583367811	1.993159085	1.623026426	1.26613963	0.410559577	1.923530386	-1.616950803	-0.680780388	-0.302790552	1.612138438	1.189760086	0.617505714	-0.45509277	0.229056541	-0.759592275	0.379914705	0.66424677	1.08287579	1.512339815	-0.081765679	-0.518243552	-0.029852503	-0.61992491	0.505542473	0.36218944	-0.692364572	-0.696806302	-0.470219502	0.63100027	0.109771922	0.384652892	-0.836080335	0.936451489	0.110021595	-0.745966005	-0.020440143	-0.401134939
24.62179954	-13.79678889	-6.423550288	-0.879465465	2.224650429	-1.116649693	-1.626642533	-3.387856801	1.398431151	2.695129422	1.565254527	-1.387916365	0.860963835	1.274539486	-1.256089507	1.879439387	-0.628134586	-0.985800576	0.946641375	-2.192680441	1.170252664	0.567317281	2.36510234	-0.899587321	-0.186284985	0.462096821	0.394599153	0.812807265	0.338985495	0.062044519	-0.609724865	0.313425991	0.113674669	-0.472530634	-0.23639736	0.387848192	0.085417626	0.278381016	-0.014043221	-0.357625414
26.63884575	-13.71059425	-9.661108851	-2.818091137	-1.138501893	1.541457324	-1.659584642	-2.817073043	-2.406573071	2.400390306	1.945242698	-3.118721306	0.191629563	0.459199283	0.988153831	1.582827268	0.529188357	-0.247149021	1.679793344	-1.704043626	0.540787071	-0.292380609	2.409979292	0.847920523	-0.45128263	-0.051946202	-0.466188808	0.233743563	0.294516309	0.088426766	0.024471092	0.047974316	-0.028859965	-0.092024167	0.338951405	0.410363337	-0.59893994	-0.28549256	-0.313635178	-0.273863848
24.96363851	-15.33798352	-6.388850795	1.944495436	1.043422906	-2.042862056	-2.135448693	-3.5305496	0.878191688	-0.294256252	0.023226915	-5.032020972	1.473857816	1.038802768	-0.135873512	2.509140166	1.267696914	0.497186856	1.090521718	-1.427193964	0.707308475	2.070457497	2.391301918	-0.395337415	0.472384291	0.176738876	-1.972314898	0.389554891	-0.720485767	0.424424145	-0.615392333	-0.263049163	0.041240852	0.253227641	0.010504143	0.004892102	-0.168698448	0.733993074	0.459803629	-0.592804309
22.57816916	-8.004575293	-2.065366809	1.119624541	1.329804853	-0.108602678	-1.544005476	-0.709874836	4.488672069	2.499785517	1.251300464	-0.314130809	0.529946904	0.167923953	0.573147881	1.049927321	-2.574514327	-0.702116111	0.065852798	-0.847098265	0.717536534	-0.360087382	1.192180447	-0.339734704	-0.752968544	-0.218869793	0.60627989	-0.844251908	0.784104783	0.569242414	-0.272416589	-0.152299903	0.11898985	-0.445754145	0.212604626	0.263200995	-0.077722681	0.471184278	0.799336407	0.25083292
10.01992172	-10.2977729	2.878303972	5.618354027	1.390628103	2.081524845	-3.570070111	2.417550751	1.504680602	1.31641281	3.997125673	-1.522020575	0.694021697	-2.375832805	-1.075714432	0.15696738	0.187942755	-1.665901082	0.508475314	-0.847233514	2.719772022	-0.472131452	-0.338884591	0.519995762	0.832423063	-0.275644892	-0.233465458	-1.083534845	-0.838272815	-0.37423184	-0.567255717	0.193726423	0.055493902	0.066987665	-0.117997171	0.10582763	-0.462929151	-0.065456049	-0.203878362	0.545326784
18.93351339	-14.49803998	-0.970535612	8.039641507	2.582004139	-2.088154214	-2.488121234	-2.288728372	-0.388986068	1.80977142	0.813935811	-4.614500328	0.911732965	0.362168713	1.750407849	0.53907648	1.009788916	-0.824375379	1.010662492	-2.103263281	1.650057934	0.335890599	1.573994237	-1.201271803	0.869591554	-0.219053149	-0.399306539	0.107031108	-0.455195434	0.591932203	-0.575341609	-0.135511662	0.248436336	-0.013968639	0.719371013	-0.448455773	-0.516614002	0.192905417	-0.37709774	0.048318044
28.96267715	-16.92555304	-2.42041848	2.333855881	3.01411734	5.600569184	-1.09733053	-0.028350831	0.172151357	-0.350159136	2.184940897	-4.106812413	-0.495692339	-0.327324774	-0.996068531	0.941623535	-0.700271271	-0.802431666	1.498700155	-1.772211205	0.252672647	-0.444132866	0.976093779	0.120021419	-1.073788185	0.868394238	0.436377054	-1.015910358	0.138615551	0.052411012	0.011537135	0.472725621	-0.007451	0.573090606	-0.52441645	0.170596657	-0.358002835	-0.041445857	0.075861891	-0.197877873
27.71234555	-13.62934119	-7.908148517	6.100091515	1.959700933	1.885182166	-3.051249769	-0.237190797	2.332404355	2.454218264	0.736888322	-1.699220345	0.648608965	-0.004466267	1.355707888	1.009509779	-0.48067393	0.350951179	0.780941679	-1.68457877	-0.380215015	0.66250388	1.898692031	-0.875777342	0.121470666	0.542532027	-0.490772886	-0.194252389	-0.650316665	0.404295606	-1.327180303	-0.358035242	-0.304745343	0.067312649	0.120366802	0.108713036	-0.309533016	0.226596509	0.342725531	-0.137766111
37.63600614	-11.3754181	-8.46520192	3.094076728	-0.789831434	5.20823966	-3.341227685	-0.852935444	-1.373218375	1.460532126	2.953968964	-4.022238676	-0.815240692	-1.608231606	0.616395389	2.032075569	0.31726416	-1.007160529	1.485013154	-1.19299348	1.618341091	-1.048512779	1.780438842	0.779936497	0.205791535	1.534888022	-0.426597258	-0.651143341	0.148406341	0.766488166	-0.203588275	0.442187614	0.322881458	0.552710471	0.159089926	0.438548922	-0.661606593	1.015733632	0.320051415	-0.442707354
28.17773896	-19.48442178	-15.98020478	7.931695802	2.54187655	9.412787504	-1.407558274	3.314118175	1.497839247	2.211534664	-1.900627499	-4.00378427	-1.597910694	0.101033337	-2.252093194	3.60516094	-1.379627407	-0.822424676	0.304571964	-2.955870534	0.945675622	1.117039027	0.827290416	-0.590670416	-0.114891151	-1.211562518	-0.315917657	0.003878932	0.321965678	-0.014746706	-0.598749322	0.509733464	0.380938793	0.50838114	-0.731627804	0.364288616	-0.502682792	-0.339010203	0.12406339	0.354639757
20.40794822	-3.732572721	-7.663166487	3.59493209	1.756491379	-1.091120616	-5.321659101	-3.05067461	1.653802908	0.910225208	-0.320710158	-0.21254869	1.365234433	-0.512751789	1.142465955	0.503102627	-1.315864048	0.479790649	1.388090708	-2.111175485	-0.087036262	-0.969616057	0.262041656	-0.697240544	-1.192429582	0.336970418	1.451612353	0.549716317	1.253913664	1.335580434	0.029109704	-0.296722522	-0.655828123	0.094890452	0.323479353	0.617226542	0.124127088	0.541281405	-0.106851829	-0.248134772
13.54347286	-18.94347369	-2.302956847	5.707635559	3.198990467	3.913703301	-5.542768294	2.289357694	2.811952765	1.058670319	2.304585987	-3.513161975	1.128770352	-2.158646865	-1.255019058	2.742338253	-1.162352267	-2.023985307	1.602153198	-0.59598022	1.241668585	-0.877214092	0.374709813	-0.385023462	-0.439717435	0.22268016	-0.153379392	0.119112602	0.358737966	0.356821476	-0.469431715	0.819143876	0.280450102	-0.038902182	0.613742014	1.010551047	0.538967567	0.264172048	0.02665449	-0.188353183
1.165471479	-24.89097285	-3.401131398	7.25903117	3.82138012	3.485953671	0.627603566	4.06676437	3.158207753	0.225300655	1.688943047	-0.311301328	1.634087435	1.590398721	-0.166323098	-2.077156598	-1.275354324	-1.990726122	-0.247938544	-0.295089753	-0.416401386	-0.723570261	1.464778445	-1.69174871	-0.225909927	0.507258115	-0.36901992	0.138911726	-0.152363597	0.365507588	-0.516681796	-0.516924633	-0.270327148	-0.224500379	0.011794678	0.927059159	0.185087049	0.12450153	-0.8225514	-0.48715945
30.4657536	-14.31169026	-7.710851463	-1.051442317	-1.064090982	2.389115335	-2.395431952	-2.140552021	-3.535715439	1.462451154	3.53453413	-1.822877898	1.172885966	-0.081824738	-0.4104316	2.943563901	0.055572859	-1.146485793	2.645052293	-2.228246013	0.612587656	0.086344588	0.884660783	-0.62273132	0.16185326	0.460300152	-0.766331303	-0.613457371	0.202324066	-0.019167257	-0.30800933	-1.062972834	-0.463454485	0.053051898	0.337779175	-0.142264968	-0.245953199	0.617645916	0.143832727	-0.837197464
30.5640196	-3.930764969	-6.220623992	4.666444452	-0.11105812	2.723139742	-4.514445917	-3.929492863	0.279269031	1.714327552	-1.334378519	-2.822605611	-1.594780303	1.421492902	0.5887504	2.03286483	0.272189473	-1.367820479	-0.073709114	-2.589462557	1.33343353	-0.622245148	2.409004521	0.183217129	-0.41601737	0.744077309	-1.021323204	0.198118473	-0.037607068	0.307574345	-0.497359107	0.06735061	-0.22866386	0.112889989	-0.552949597	0.03124745	0.111797606	0.28951477	-0.404053099	-0.29745062
16.96910123	-13.9437862	-6.748206531	3.470666258	1.828522988	4.288989214	2.690929009	-2.080821499	-1.271073481	0.654172303	2.18948837	2.956936086	1.129772751	0.506911551	-0.855468546	-1.931914236	-0.445808483	-0.884160151	-2.722450002	-0.126065228	-0.483457327	1.451720242	-0.888994998	1.738969038	-0.615005432	-1.338590566	-1.781092091	0.586985492	-1.066947857	-0.354538113	-0.709665735	1.067325625	-0.379039779	0.262056265	0.05229208	0.105599812	0.190200079	0.244129541	0.104655445	0.419674225
15.72303801	7.39076856	-0.153568886	3.363988228	-0.543279087	0.309705124	-4.553704359	-0.866983641	-1.351301104	0.859177864	-1.905232334	1.673151848	1.616367224	0.970552603	2.424685557	-0.614328832	-0.109877556	-0.486241059	0.014248304	1.663185741	1.221426711	0.361892414	-0.412998786	-0.98120704	0.925204696	-0.484128175	-0.15916871	-0.578548849	-0.513292695	0.161599206	-0.587212463	0.407910904	0.333543235	0.042834179	-0.171402486	0.161991	-0.638165934	-0.421674678	-0.026692601	-0.209630437
0.451079984	-2.970463196	-1.480114946	9.680603037	0.051275684	-1.090562605	-0.260653784	-4.115194053	-1.65695534	-0.602075408	-1.51756889	0.821559141	-0.863905832	-0.390878956	2.270431348	0.956585796	0.025771162	-1.385286721	-0.3669814	0.988799547	2.711805397	0.695834185	-0.493568405	0.52832924	-0.626135192	0.5008985	-0.322316319	-0.392615246	-0.035756091	0.258125754	0.077640239	0.137283578	-0.170354776	-0.277618638	-0.748244714	-0.08371701	-0.038681631	0.098223833	-0.089959861	-0.555149739
5.174132575	11.77153906	-4.187870228	-0.462102175	-1.802387319	-3.02116827	0.302128627	4.084281346	-1.566978609	2.021236707	0.509590301	0.534336452	0.597109213	1.946440689	-1.700875132	-1.593724947	0.751041454	1.076895103	0.458161067	-0.985890161	0.840096592	-1.322994889	2.338487583	1.097157817	-1.352008441	-1.07160488	0.175411971	0.941162076	-0.589245637	-0.053693207	0.28239987	0.231815522	-0.100591272	0.268510221	-0.049186831	-0.851383223	0.057221372	-0.293051484	0.233748874	0.684853756
-3.555618548	-4.677218795	-5.243301782	-0.318632604	1.262442565	-5.448127566	-0.284491024	-0.614348741	-0.515810482	0.667054137	-0.458581914	1.306154741	0.335111368	-0.106061802	-2.195764284	0.066202329	0.784973499	0.792255069	-0.472157846	0.409037158	-0.166759594	-0.155008597	1.181100796	0.092273465	0.4168873	-0.77007101	-0.633075319	0.146006343	-0.138885817	0.100954716	0.518869785	-0.383226209	-0.210589031	0.158878494	0.221639025	0.145404685	-0.267759653	-0.301401463	-0.252107389	0.154441155
20.51951448	-9.437550993	-1.615660331	2.06387882	0.953835119	2.360968366	-1.905139	-0.323753157	1.826729496	0.513369971	0.738619688	-0.642368253	-1.155999665	0.010864705	-1.377390154	-0.689454378	0.327431642	-0.716303052	-0.230255937	-1.125688332	0.654554212	-1.617409433	1.024817036	0.360610952	-0.438023054	-0.008766664	0.311883547	-0.755344324	-0.045126087	-0.088312669	-0.417478078	0.25745657	1.270260516	-0.092881747	-0.417390947	-0.737186857	0.036165575	-0.675364622	-0.490203478	0.331444519
13.43967153	-11.30237765	7.757751029	-4.251300978	3.447584781	3.77154651	1.198292893	1.626175893	-1.213202102	-0.813614938	2.877483651	1.451642245	1.869266757	-0.574995714	-1.145311911	2.323130361	-1.238267709	1.009159025	-0.604969981	-0.432813479	0.990143436	-0.212650136	1.659618335	-0.044687791	0.359824524	-0.309742274	-0.22540745	-0.621747373	0.095932959	-0.262028741	-0.757283906	0.315813033	-0.266198805	0.035543723	-0.16427587	-0.29909259	0.467985369	-0.274989549	-0.093428059	-0.339058561
-3.749699198	-1.893073076	5.491974951	4.521505203	1.356164254	3.707135249	-3.297376062	3.215990094	-0.042224076	-1.541944139	-2.344335249	-0.202118427	-1.086464399	-0.60981653	0.074255478	-0.14355951	1.497239429	2.496814318	-0.027643157	-0.575904902	0.185485255	1.097651225	0.02267131	0.517874881	-2.017486314	0.709753576	-0.220284042	-0.472148552	-0.167021132	0.716857195	0.615473958	-0.437497654	-0.184158183	0.066021522	-0.530348925	-0.077322952	-0.666433058	-0.216552742	0.146129221	0.064686682
-1.63220301	-8.167191445	-2.277481271	3.398250849	4.08057902	-0.773969902	1.221653699	0.198170654	0.504707732	1.264477587	-2.36978562	1.261151937	1.080829865	1.077816687	-0.150259619	-1.664979655	-0.157236255	0.331719109	-1.85637683	0.506527297	0.081225946	0.181029031	1.714677821	0.166627891	-0.641378109	0.1423871	0.505942117	-0.18046844	0.61029394	-0.031857275	0.605030447	0.223561111	-0.416502002	0.480842068	-0.588361463	-0.2316667	0.210200821	-0.03020277	-0.123931198	0.214763401
22.99390215	-22.71287882	-4.448565062	-0.21183413	0.476998345	6.870361248	0.633051444	-0.938290847	-3.295459435	-1.274160684	2.878253802	-1.396941992	-1.261073443	-1.385270355	-1.201359882	2.111128426	0.455142261	0.953674292	0.88073539	0.554944586	-0.06785076	0.175551068	-2.146650665	1.461945812	-0.294635273	0.495628849	0.621068112	-0.315771043	-0.171970987	-0.259626892	-0.593046253	0.24095962	-1.365210514	0.68523254	0.079088305	-0.255929079	-0.677686092	0.616896231	-0.392167516	-0.937983192
-8.794515514	1.182918817	1.982824796	4.668627189	3.574304718	-7.567300048	-3.985911737	1.04435084	-0.115331416	-0.130639162	-0.840221566	-1.252805536	1.889396188	0.690518951	-2.00215409	1.184277693	0.966225512	-0.469309829	-0.653948644	-0.52153179	-0.143600025	-0.723333244	-0.186238028	-0.883375649	0.297202108	-0.644476762	-0.137961387	0.543434179	-0.378974837	-0.788738896	-0.243085524	0.057126579	0.431729856	0.107218488	0.127552592	-0.202185244	0.223223147	-0.221070467	0.285878623	0.354690994
18.49280843	-4.034947405	-0.380431251	-0.739190622	5.341253852	3.25032895	-5.750970616	-1.139911199	-0.498809281	2.42927107	-0.541622881	-1.838629395	-0.573172315	1.631148911	2.024546434	-1.228633244	2.419528885	1.132510499	-0.656267609	-0.027302197	0.37754128	-0.936201134	-0.028251483	-1.002277462	1.025649595	0.797328486	1.729989913	-0.303699995	0.010113073	0.181416824	-0.841468648	0.233239096	-0.541279107	-0.141148341	0.036195361	0.389550114	0.359956569	0.772947613	-0.581079883	0.179738902
35.01996491	-8.71446247	-7.285564474	-1.57257971	-3.09698101	0.081119695	-3.300600166	-3.038767115	0.862303334	2.181319238	1.988721096	-1.722472184	0.250515651	1.439652032	0.551084661	0.973925474	-0.455282704	-0.859629463	0.812211302	-0.470687346	1.430902025	0.272910542	0.085477439	0.649521355	-0.828804457	0.25585276	0.428020349	-0.753578032	-0.640856994	0.380713345	-0.274063506	1.06429737	-0.521887719	0.497734048	0.249885357	-0.295351763	-0.260802939	0.28984515	0.298852194	-0.276980265
12.41744045	-7.152735575	-8.306785496	2.195063646	-8.857135612	-4.43507927	1.367122811	-1.10647313	0.076588332	2.829229633	1.308418924	0.696741154	-0.024136957	-0.261038604	-0.891828408	0.929900769	-1.130062041	-0.786169323	-0.313411614	-0.897265812	1.997976683	0.565517817	-0.096770523	0.340433303	-1.169858614	0.193852588	0.981454134	2.217412539	-1.007536957	0.538109708	-0.508013562	0.568160768	0.033317408	0.163502404	-0.277522446	0.032200398	-0.065975656	0.26472112	0.215350484	-0.460247796
17.13594841	-9.171866058	-2.014624046	-0.548587131	1.209680978	2.453522117	-1.355230765	2.086519136	2.173437689	1.289353784	-0.570844841	-0.933427583	0.001807914	-0.281085456	0.363480127	-0.914119506	0.087487878	0.631693173	0.393049063	-1.397193684	-0.749235267	-0.904154374	0.332770647	-0.921891531	-0.128956583	-0.8864207	0.099797396	-0.143528897	0.153642426	-0.028120743	-0.203840533	0.109305736	0.333292098	0.26099457	-0.174726976	0.6775438	-0.163399626	-0.406589628	0.036788302	0.219184559
3.834368592	-5.748387788	5.96905765	-0.306554547	3.846653678	1.225306297	-0.75154518	0.409817812	4.093083989	-0.082081069	-1.136267541	-0.757833429	-0.017029061	1.898102981	-0.137903267	0.231628745	-0.299065201	0.383568749	-0.564284291	0.593463552	0.475997355	0.075595249	0.600482098	-0.722972539	1.317991809	-1.622047069	0.795851277	0.926685262	0.182585315	-0.072584005	-0.497815516	-0.242396478	-0.193711022	-0.027253477	0.503395246	0.010062683	0.294020402	-0.303200846	-0.681483314	0.085991033
-9.800130464	22.71375093	-10.41948264	-0.626950608	2.318565202	-2.315304485	0.613150945	0.018885996	2.744148458	0.167073162	5.100125849	-0.140650516	-0.988038776	-1.124964514	0.70214873	0.402541627	0.036541112	1.269562695	-0.323388173	-0.522753518	1.215927894	1.057866994	-0.367804219	-0.55760214	1.03471668	1.397743658	0.290750768	-0.334517578	-0.092766891	-0.097899449	0.02757401	-0.234821277	0.681702351	0.112332481	-0.259533977	-0.033573666	0.087979631	-0.369337739	-0.308018506	-0.913753248
-15.27656278	3.126434752	-3.957828016	0.643311708	7.621023208	-2.232064998	1.823104315	2.04061863	2.30519902	3.558343235	2.867461753	1.417764705	0.644905722	-0.017131681	-0.754155607	-0.493211634	-1.544110805	-0.233622378	-0.024932748	0.074377627	0.781668062	0.20601563	0.692940997	1.29906567	-0.189801948	-0.198330414	-0.18326068	-0.148232947	-0.917454394	-0.367832738	-0.361927821	-0.228757747	-0.937567028	0.236413014	0.233360751	0.099756471	0.076412409	0.121170453	-0.276940343	0.380551873
-2.238234126	-25.19177916	4.422416636	14.11843436	2.559817342	-2.480324675	-0.189338126	-0.11464471	0.59209837	0.585677971	1.06541257	-3.630533598	2.073599301	-0.403672056	0.972621043	-0.004940348	-0.498958079	-0.503417488	-0.203310808	0.35465925	0.5408556	-1.305508431	0.434210913	0.686702171	-0.123958558	-0.366413964	-1.159200962	0.27945717	-1.257227369	0.152680664	-1.064460612	-1.031417577	0.686555835	0.300465803	0.237568981	-1.43927401	0.781107067	1.200853007	-0.507089646	-0.729902596
32.00993841	-23.60137701	-9.789804924	-6.251211656	5.59762096	7.280526761	-2.063562914	-5.053710767	0.347857071	-0.043386931	5.164513489	-2.094708709	-2.425241218	6.415300418	-0.62000967	-4.754903295	1.014904338	0.474324297	-2.139210448	1.447848781	-1.516412969	2.895996443	-4.148571738	2.148576275	-0.157820223	-0.21023288	0.911021554	-1.145971063	1.864749653	-1.491745577	0.151734455	-0.323691498	0.541624049	-0.273357437	0.351814902	-0.799415967	1.304678369	-0.17927804	-0.116086705	-0.060169677
6.524505311	-23.12066466	-2.660264747	0.970081436	2.330625065	-0.83824089	0.104422452	0.004911547	0.778417022	-0.252557593	3.248389208	0.558163878	0.524220793	-0.119986528	-0.225374163	1.429645238	-0.32445742	0.17461443	0.079975052	-1.347003992	0.847706428	0.55653093	0.204586895	-0.389763862	-0.353069842	0.959596342	1.388202607	-0.504254472	-0.604078152	0.204948355	0.16159767	0.310282742	-1.092730651	0.363899701	-0.260169254	0.238852496	-0.126484041	0.322170814	-0.218649169	-0.507161755
-3.259777416	-1.329637415	2.647133214	2.609917276	0.338629078	2.656719469	-3.530710462	2.40708491	1.214104747	-1.124369788	-1.721715533	0.539351515	0.548787038	-0.757694065	-0.123820036	-0.43579905	1.142557025	1.830622215	-0.568614019	-0.614898404	-0.006114683	0.684511492	-0.695294154	0.605512018	1.492303738	-0.704930101	-0.420094211	-0.735208893	-0.075011292	-0.147971279	0.472087781	0.023837089	-0.010400049	-0.165224315	-1.169686551	0.340458361	0.163927033	0.620013559	-0.074252771	0.192719367
-6.589870964	27.09189928	-8.838436032	-4.014965361	3.42038911	-2.465909665	-1.692416625	0.531417101	0.244211244	-0.88813966	3.845788775	-0.154739296	1.082715059	0.733208991	-1.458104388	-0.317610003	-2.231120647	1.288741816	-0.673386223	-0.428199174	-0.435864096	-1.074731403	-0.338006738	-0.510333355	0.414328819	-0.431990887	-0.376520056	0.626975342	-0.733526414	0.621915053	0.1880687	-0.270324919	-0.00710313	-0.09572898	0.126649664	0.101917599	0.039296991	0.050187835	-0.224984774	-0.366735235
7.682521343	-6.228134657	2.125524214	-1.982206437	1.635495719	-1.11150113	-4.674783838	2.435896627	-1.241374322	-1.765987352	-0.118406551	1.70078463	-1.036223694	0.808813056	1.078781928	0.548262863	-0.881899103	1.411478733	-0.754346822	0.182071966	-0.075194457	0.005119288	0.677644226	-0.454888381	0.931209486	-0.631647942	0.780215464	-0.027795733	-0.17613289	0.084034964	-0.250716934	-0.015913778	-0.294689657	-0.034874675	-0.532734284	-0.577440198	-0.703887321	-0.120970575	0.138022859	-0.374145105
12.75851304	23.30645446	2.279590856	9.169663657	10.5947028	6.545695163	-4.17712624	-2.87290953	-1.810222252	-1.750299224	1.874115773	2.177951856	-4.99548164	-0.491967431	1.681347338	-3.238880112	1.721552249	-1.561630821	-1.238553511	0.366048357	-0.105593505	-1.567162987	1.704705853	-1.965652113	1.856747676	0.067535858	-1.892935395	0.407300282	0.295406074	-0.460139158	-0.384413598	0.494998352	-0.200569956	0.086525973	0.346864435	-0.005302806	-0.245234281	-0.685986984	0.644215856	0.568020075
7.164416077	7.298751682	-2.721563507	5.126079509	-0.751612145	2.27302275	-0.835017177	-0.505042253	1.791537544	-2.285491711	-2.969830635	0.908388276	0.317638321	-2.049578326	-0.107737346	-0.595721587	1.133510822	-0.575335694	-0.692832841	-1.382044256	0.137987571	0.251125185	0.370610031	1.367822447	-0.041724846	0.956860636	-0.108296934	-0.172022126	-0.146691215	-0.228940136	-0.192074356	-0.466269524	0.251030258	-0.518011137	-0.78773387	-0.157850753	-0.543977866	-0.106212516	0.36895127	0.170383222
21.48926958	-13.55605748	-6.517203679	-1.989358906	-3.905903967	-2.138477066	0.845574864	1.210838674	0.001502176	1.769706886	1.783513984	-1.415661735	-1.416685602	0.452299876	-1.549295686	1.350374575	-0.34341299	0.920261251	2.337275404	1.504106406	-0.001013707	0.117420047	0.45154428	-1.317792192	-0.952266663	0.077049717	-0.398007683	1.836870848	-0.011325552	-0.223726728	-0.642935466	0.003507013	0.113555273	-0.612451795	-0.49754511	0.2214012	-0.219871313	-0.498147037	-0.044451966	0.834530684
15.99481138	-8.423171076	0.599249832	2.92345232	-0.018643665	0.844235717	-1.419916108	0.259057222	-2.039807583	1.792731899	2.176973556	0.503202637	-0.372675079	0.340637642	-1.798416172	0.94755205	0.551562094	0.385240372	0.356289448	0.979479812	-0.185501759	0.607485391	-0.635677639	0.989018314	-1.143815327	-0.292793517	0.562652966	0.540824809	0.311026364	0.810317272	-0.435306262	0.191153552	-0.730602222	-0.36892986	0.011414431	0.103765435	0.519638882	0.393756854	-0.522837682	-0.127218695
24.66305686	-13.86866195	-5.686879288	-0.389660399	-0.18168582	3.525492446	0.20408681	-1.700014798	0.517590411	1.823166992	0.620162882	-1.670697469	1.594448385	3.194250266	0.599570876	0.268077479	-2.008439045	-0.681118788	-2.531258327	-0.198748524	-0.255268469	0.781594059	-1.293211335	0.479062994	0.00666137	0.35073792	0.145379159	-1.137441453	-0.909222827	-0.698016616	-0.132041889	-0.475249033	-0.699546925	-0.459688851	1.138667922	-0.405412446	-0.261780708	0.263133045	-0.30327108	0.238223228
28.94265468	-14.29136438	-6.844360944	-1.276258223	2.522571377	2.450003938	1.821521015	2.22229218	2.780518298	-1.916281008	3.092869149	-2.177690044	-0.557558606	-0.535902821	-1.290627232	2.439323248	-0.034836192	-0.198694454	1.137931999	-0.293049539	-1.031022374	-0.764784274	0.214006689	-0.336969883	-0.404499006	-1.249405681	-0.865512815	-0.159669321	-0.733835492	0.4187301	-0.728880817	0.021291007	-0.564595071	-0.681156807	-0.415419269	-0.459159542	-0.599118515	0.187660194	0.259587778	0.055672946
24.94455406	-17.33491617	-5.422153899	1.143720043	-1.224835163	-0.915285042	4.862893424	3.494237195	1.595553436	-2.381087859	1.736814035	0.14358788	-0.583227639	-0.351701555	-1.758615484	0.591962075	-1.433278894	-0.149185046	0.057373003	0.259748333	-1.085344606	0.598051264	-0.46774106	-1.495858644	-0.829279699	0.512025856	0.379177714	-0.178952261	-0.694580635	1.007876337	-0.43746295	1.403900617	-0.63364644	-0.025006583	0.293971288	0.910018188	-0.534259388	-0.83155736	0.033839967	-0.420048402
18.98656985	-13.62189434	-2.178674477	5.119498508	1.798699208	1.714188041	0.319130189	-0.415017501	-0.727332668	1.877504118	0.90572375	-0.180123303	0.663048787	0.293519052	1.208932631	-0.937334131	0.76582688	0.34957674	-0.841962389	1.0759728	1.759889556	-0.646174991	0.126062127	-0.326321267	0.961172138	0.417682758	-0.091729052	-0.338803057	-0.417067191	0.125415337	0.796678153	0.487371201	-1.077962615	-0.167519643	0.858100206	-0.699838607	-0.231935624	-0.015752291	-0.355811018	0.601766278
5.450326981	-15.85094137	2.547056731	10.57658329	1.033877774	-0.519460236	-1.812627325	-0.753255064	2.79129073	0.605409773	-0.15707273	-2.194484402	0.69159847	-0.0410902	0.560800581	-2.024294389	-0.103506025	0.163750678	0.279562554	0.159849541	0.804039501	-1.767168704	1.705766201	0.881255572	-0.03144469	0.614904565	-0.291802983	0.023896279	-1.169966104	0.311415743	-0.852501627	0.335201663	0.049243052	-0.336650042	-0.826185521	-0.056180271	0.48132529	0.15837244	-0.627922593	0.238272768
10.36924299	2.446560545	4.208756371	4.726559691	-3.068195555	-1.276987293	1.950845922	-0.268976452	1.286400103	0.907723444	-0.607884333	-1.731482676	-1.378625431	-0.087440302	1.253382193	-0.74788631	-0.376264177	-1.270089963	0.060052267	-0.031180423	0.870336926	-1.781607655	-1.096791581	0.771314526	-0.963364865	0.16478232	-0.254022474	-0.030939094	-0.26313069	0.404772848	0.545328794	-0.15481061	-0.386673384	0.397093019	-0.051575271	-0.165767129	-0.51468565	-0.386220323	0.186889821	-0.202483346
9.143626277	5.663206757	-3.366720694	-0.003031864	-1.08614879	-2.996683803	-1.377430887	1.966557497	0.975269128	-0.590633739	-1.090024473	1.603770672	1.234256464	1.431709589	-1.432884119	-0.776800039	-0.115861583	-1.550903683	-0.273392417	-1.473600156	0.302559314	-0.129819966	0.412946328	-0.02756414	-0.693842235	-0.735506005	0.46777823	0.349509594	-0.134811405	0.529695578	0.82782033	0.332878661	0.306575144	0.116069624	0.547357403	-0.017025793	0.186240141	-0.058563944	-0.48117238	0.461958574
11.00377444	6.120669651	-4.577983767	2.961908843	5.339639299	1.247229509	-1.65094021	-2.470004694	-0.173786052	0.089491388	-2.269946873	-1.657926259	1.088319419	0.55433783	0.62241628	-0.9071021	0.956837307	-1.118965546	-1.839211965	-0.589778286	0.006719294	-1.380008458	-1.468873732	0.697934716	0.16471435	-0.703445743	-0.489821957	0.371938998	0.294310129	0.733413882	-0.315116815	-0.191410255	-0.006489126	0.217482903	0.276872996	-0.321783488	-0.314652027	-0.399373692	-0.576552893	0.194683796
26.4686598	-13.05784462	-6.088848771	-1.658745963	-3.544112046	1.900975999	-2.607161111	0.268646477	-0.870700413	1.525379097	4.857566127	-1.299495002	1.243787946	2.101451253	-0.650559171	0.955606824	2.057295621	-0.412619056	0.687766803	-2.049502031	0.605092604	-0.180480909	-1.278553215	0.761201793	0.267844448	0.197319389	-1.259854748	0.240674768	-0.279246629	0.21829766	-0.358804307	0.328942019	-0.828087348	0.200960492	0.53222061	0.018104117	0.187671917	0.379312794	-0.273772678	-0.367954356
6.305089162	-1.473693306	-4.269264387	3.307932612	0.649761595	6.788848104	3.254814752	0.66218154	-0.757893384	-1.0175209	-1.401062664	2.942651395	0.024315978	2.589348384	0.56037093	-1.483256809	-0.273640047	-0.794408366	0.315710875	0.297100406	-0.423369183	0.718084825	-0.149984255	-0.45411036	-0.180888441	-0.286197978	-1.035242393	0.141830427	0.249600105	0.703059959	-0.639717596	-0.326430745	0.074896555	-0.215506548	0.548222573	0.242386779	0.225199595	-0.193418056	0.402068535	-0.05295685
12.77964809	-1.616278907	-1.473949654	0.815151514	-4.946826886	-0.916811615	0.906242125	0.758145114	2.039809226	0.025945324	0.68221061	-1.353207641	-0.085602848	0.249153068	-0.811516709	-0.46308291	1.927331873	-0.15377897	1.509225401	-1.391188598	1.744921908	-0.781348592	-0.59556805	-0.373892223	0.277528739	-0.450431008	-1.6416606	-0.54778349	0.957327052	0.047980696	-0.369972435	0.524386706	0.613899647	-0.259071076	-0.732081715	1.441557365	0.460235382	0.323333744	-0.921213088	0.673955075
1.008017434	9.259727707	-9.111541832	2.117308074	-1.309138713	5.696994083	1.076045713	-0.624161062	2.487187821	0.159255819	-4.159701933	0.268060916	2.354728435	-0.372775781	-0.122889625	0.305635571	1.027270503	1.011364238	0.450426637	-0.708336445	-1.876606094	-1.089838742	1.409840761	0.856007763	1.424267975	0.865981522	1.454516114	-1.148997081	-0.0702093	0.917207183	-0.290115624	0.738248374	0.661206221	-0.415113423	-0.92369425	-0.328719935	0.710593471	-0.552941933	-0.238046665	0.816880933
12.45177178	-18.96625338	-5.032996135	1.579354605	4.827739081	1.23840361	0.764653631	-0.850297976	1.406975663	0.574583323	0.879841952	1.005001721	1.975481429	0.49671751	0.449020784	-0.213735001	0.015153387	1.80065128	0.329861252	-0.690235037	-1.482808151	1.514784917	-0.553185373	-0.233935798	0.823633626	-0.011739263	0.55923947	-0.197164772	-1.250306262	0.158377379	0.26398252	0.168466717	-0.686998857	0.464380015	-0.919532665	-0.127958278	0.229223778	-0.086036169	0.143856512	0.077471858
7.03524753	-8.405703295	2.779450182	1.619627924	2.017754689	3.385585136	-0.594710589	3.897409079	1.468860535	-1.011313925	-1.847033181	-0.877479503	-0.617257023	1.712787852	-0.024047051	-0.866615009	0.785909524	2.199227143	0.218910466	1.496193079	-0.165855625	-0.273868798	-0.221171903	-0.153290145	0.909375847	1.025233398	-0.047587791	0.799626789	0.595720537	1.060463444	0.16192171	0.434665399	-0.23874921	0.010469165	-0.327515375	-0.161623268	-0.802341455	-0.255026584	-0.421117737	0.145514902
7.564042128	-11.30988644	-8.477455047	-3.647179053	3.603004816	1.628554001	0.583297451	-0.797430749	3.588114113	-3.001274258	1.154867994	3.10211691	-3.14448333	-0.254478104	0.980431964	1.973026743	3.234791994	-0.388864091	-0.054787608	1.884114939	0.025663975	-0.07636924	0.213043279	-1.922736123	-0.151207051	-0.278070415	-1.66953002	0.336509542	-0.113196344	0.518507013	-0.811584197	0.162460917	1.207022295	-0.000625876	-0.675315112	0.079374879	0.36915635	1.119583357	-0.151097107	-0.546924827
-6.211811569	7.603377531	1.438155828	2.907986725	1.180920062	3.303911781	-1.81434114	3.492944089	1.912664018	-0.374815371	-2.613501917	0.446425946	-0.164952403	2.134685678	-0.159019286	1.014658183	-0.666507443	1.246555194	1.271852117	-1.556471005	0.024649264	0.89406319	0.667303931	0.721901999	0.160292103	-0.754810199	0.187055103	0.683167489	0.326321782	0.484980032	0.772758293	1.340354009	-0.406395887	-0.239759796	-0.360673462	-0.423710582	0.343809875	0.03151614	0.082227112	-0.330542226
2.326553975	-2.21368424	-5.363766973	0.102958689	4.037569239	-1.294691187	-1.500656141	-1.611940969	0.2667183	0.680305525	-1.590502577	-1.190562448	-1.977338796	0.017607176	1.668487519	-1.250188574	-0.70234467	-0.546515807	0.44137411	0.698966068	0.646700593	-0.159932341	1.811331924	-0.477148544	1.103167247	-0.103288245	0.332875012	-0.182384249	-0.015016787	0.348956772	0.780848085	-1.084539552	-1.072010344	0.332708899	-0.055099117	0.099998926	0.099470999	-0.268631854	-0.379466444	-0.433102274
-4.666318878	16.97169397	-4.012145093	-2.622132754	-4.852710559	4.165495544	1.961635501	0.426319975	1.181707765	0.439009625	-0.460550329	-1.164956662	3.112104508	0.608140745	0.390982252	-0.131084926	-1.662456198	-0.573971388	-0.192579198	1.717475344	-0.648828911	-0.120332375	0.248048181	0.077407195	0.068019906	0.133829502	0.478282631	0.477474511	-0.040128995	-0.563139914	0.219924137	0.044257806	0.042081882	-0.25230763	-0.400121062	0.248864041	0.299800218	-0.63991218	-0.012116956	-0.176447912
9.725160277	-5.255290574	0.639197473	2.571042974	2.568180694	0.048540456	-3.841609553	-0.790211181	4.200002311	2.727019364	0.242900126	1.06186771	-1.069037693	2.216607304	2.901933559	-2.535926787	-0.036430064	1.725514623	-1.714468935	0.72735435	0.377529738	-0.732957882	1.049337827	-0.825292234	-0.491213477	-0.703519499	-0.799441627	-0.37507121	0.246764216	-0.053753892	-0.106468119	-0.518412461	-0.550292784	-0.062253329	0.269933454	0.482467714	0.000526293	0.046112018	0.041738408	0.07819361
4.413225737	-3.870345966	-10.00493434	-11.37473356	-1.121138185	-2.064492152	-3.699650238	0.970431438	3.279418297	-0.262100693	0.857257007	4.304488458	-0.428749018	0.501556966	-0.645904309	1.267959268	-0.145347849	-2.106679267	-0.199477648	3.288162264	-1.594911787	1.546418032	1.56867105	0.064298091	0.877475895	0.756430372	-1.053790903	0.548434128	-0.98523167	1.144357803	-1.396646457	0.32742187	0.884929692	0.669934761	-0.042262399	0.119469128	-0.181130929	1.062150978	0.018718918	-0.296801613
15.30592066	-9.917926786	-2.635241225	-0.918540011	2.844945124	2.532180993	-1.196128819	-0.399933932	-0.172469047	-1.77706165	-0.595551323	1.99634203	-2.154418317	-1.63616706	-2.982514228	-0.136296315	0.664895486	0.462679393	-0.228341912	-0.394506333	0.910559272	-0.760472288	0.825729877	-0.658720105	-1.024714511	0.035508098	0.375350611	0.968944375	-0.052085395	-0.587285892	-0.732650415	-0.321794687	0.140738259	0.333784967	0.252371601	-0.26406849	0.418708765	-0.52772546	-0.108171485	-0.162742513
2.904922886	2.178076247	-5.805978917	2.438284545	1.871172969	3.880438833	-0.678332577	-1.011827449	-2.40870669	2.878067975	-0.74059989	1.9146586	2.265029576	-0.991748013	1.381230352	-0.183758197	0.71737808	1.778764664	1.001055376	-0.063626292	1.986545171	0.59480457	-1.209642097	0.082041391	1.112781382	-0.271637892	0.385848684	0.242858077	-0.187708749	0.339134435	0.863459352	0.051692961	0.274584074	-0.559728302	0.126186883	0.556095401	-0.313901929	0.089838668	0.182598135	-0.207128273
-4.036324744	-5.247853658	4.227228442	-2.624752197	-1.006404726	-5.101237244	0.645639718	2.618978949	1.577302005	-0.328751046	-1.230072789	-0.051523878	-0.7018109	2.420915579	0.877502608	1.535197622	-0.32936967	-0.186003544	-1.453803995	-0.638817421	-0.688759025	-0.592805092	0.51522221	-0.37710203	0.837434123	0.436448685	0.983585224	0.331769076	-0.279853015	-0.158274681	-0.219266597	-0.243560288	-0.307446448	0.502445517	0.059366172	0.238526118	-0.079107746	0.422949538	0.664953718	-0.157708729
-2.302490833	19.90359775	-3.604193966	6.980755358	1.858576175	5.865497536	1.487627766	-0.51257374	-3.167696913	-2.407469288	0.009959313	0.960068792	0.071179996	-0.546881614	0.10070368	0.542766174	0.9431794	1.632239831	-1.513287124	-0.29529514	-0.036917294	-0.535149315	0.253063526	-0.565731162	-0.017000234	-1.092445396	0.084044286	0.386443397	0.01758073	-0.24874392	0.760235569	-0.196628214	0.68609246	-0.331911285	-0.780493551	0.063986897	0.286199154	-0.293391196	0.60563753	0.436134996
-0.262156322	-0.622073146	-5.283779452	-0.337592906	-0.487487567	1.038645968	1.043573194	1.161499994	0.232171829	-0.59344434	-0.638017005	1.8271606	-1.28889894	-1.815555268	2.072918851	0.360594538	-0.255399574	0.281454466	0.128621694	-0.466021863	-0.489515359	-0.68604994	-0.309926968	0.632897506	0.963002048	0.935231203	0.029027705	0.361677675	0.39595621	-0.454315976	-0.072341505	-0.05431382	0.75004153	-0.421734182	0.312686426	-0.305390309	-0.271614391	0.503333088	0.030390681	-0.277216739
23.26245645	1.133403136	0.275358337	1.966784423	-2.009577197	-1.810340475	2.662470125	0.952165146	1.31517488	1.631289135	-1.607149588	-1.901644442	-0.561588643	-1.105817188	-1.749124958	1.146831983	-0.038164722	1.181260994	0.935594509	0.74799181	0.18899689	-0.408404362	-0.459708993	0.47838828	1.460293418	0.179487226	-0.027078887	0.171869115	-0.760283255	0.072132725	0.408752227	0.253434074	-0.12574272	-0.243174456	-0.308761666	-0.053499849	-0.217970121	0.051904126	-0.0607112	-0.006778855
24.74283953	-11.99710003	-7.887866752	-1.921733604	-0.72293646	3.282700532	-0.419343051	-2.935127588	-0.733023283	2.314870245	1.751326943	0.571567618	-0.565896872	1.592574646	-0.980868088	0.283814036	0.50923313	-0.862798143	-0.553458054	-0.28571963	0.231220839	-0.720741107	0.028251615	-1.213278188	-0.600393239	-0.137632799	1.555878528	0.373250609	-0.433136647	0.150250996	-0.015478958	0.950290617	-0.422348276	0.434007081	-0.12704332	0.171029254	-0.496323762	0.170463706	0.451942336	-0.204595883
33.19446027	4.894432924	-8.304353612	-1.04639191	-2.990599634	-2.240432645	0.385464013	0.120382492	-2.09193746	-0.073332775	-1.476737663	0.329767578	-0.565239528	0.082258863	-1.951253676	-0.406741897	1.840118331	0.719596872	-1.149679288	-1.734192483	0.345874416	-0.32882833	0.993474472	1.686235365	-0.86633924	-0.27719673	-0.398770354	0.15934198	-0.178780475	0.596683358	-0.064027648	-0.102257492	-0.049351523	0.146226911	-0.387522161	-0.186365846	0.010767765	-0.528804109	-0.316344502	0.624480021
-9.54203988	-1.013474397	-2.814999622	3.92940471	1.772767319	-4.993316792	-1.820275691	0.170822696	2.321871667	2.888056723	0.456376001	-0.117196181	-0.268565267	0.919303145	0.05564221	0.290722325	-0.597021213	1.040327528	2.592483557	-0.467634479	1.835566463	0.659361028	-0.426324654	0.789460527	0.730800799	-1.082514277	-1.00068304	1.403223499	-0.337761069	0.981251946	-0.077548691	1.076060125	0.422779331	0.974573031	0.648900332	0.352671788	0.226040019	0.412584686	-0.530250809	0.251642775
22.43871162	6.457344305	-0.071767537	5.335507127	1.354574943	-0.3020354	0.52022707	0.711592995	-3.863079096	-0.584198398	-3.826614275	-2.178352071	-1.045646158	1.016168022	1.937586391	-0.953776003	-0.927798395	0.861674711	1.054168765	2.153721939	0.381304983	-0.47985368	-1.121988286	0.580635316	-0.488696569	-0.59506035	-0.553011878	0.377130818	-0.502737522	-0.419723238	-0.752942655	0.201964708	-0.172689948	-0.55413606	0.231515914	0.03323092	0.011171076	0.609206082	-0.198444749	0.296857913
33.94318681	-1.682447022	-6.552252346	2.651719756	1.481539616	2.380918391	0.303122976	-2.378544372	-2.897770712	-1.14011691	-2.084590652	-1.328509247	-0.912752105	-0.501701069	0.224118548	0.655566215	1.988443824	0.23109128	-1.019645131	-1.478663514	0.016539506	0.168419365	0.616331905	0.598020253	1.002190729	0.266092029	-1.662558642	0.11014486	0.113883296	-0.666934231	-0.632515016	0.561776251	-0.213007651	0.44869308	0.078844343	0.201593467	0.241825044	-0.125619401	-0.323591036	0.485699094
-4.244561054	1.939401827	3.570696351	-1.821617063	1.992654063	-4.019564293	4.815292101	0.412784931	-2.222872916	-0.873326537	-0.382655689	-0.352546458	-2.176895685	-0.013321575	-0.703495446	0.628672764	0.417536189	0.531829382	-0.547963996	0.784715782	0.076978782	-0.385407814	1.686931583	0.718923456	0.12047788	-1.080113894	-0.452839458	0.255912663	0.91254432	0.087211456	-0.265261214	0.458405002	-0.518379519	-0.003873646	-0.165463056	-0.455913449	-0.036519485	-0.104341308	-0.377796397	-0.155368543
-2.491301187	18.90488601	-0.688720378	7.983360135	-3.215918388	-0.31986856	-0.810764243	0.638382754	2.940758893	-0.036007561	-2.12264781	1.654047683	1.407380169	1.666451221	0.460041755	0.759774874	-2.508631471	-1.284901049	0.381938459	-0.396194028	0.528709928	1.080205162	-2.46562957	1.090195525	-1.238647034	0.229157123	-0.347571735	-0.931971966	-0.418472353	-0.44130591	-0.459844189	0.519475575	-0.364581018	0.198971995	0.216449831	-0.029904479	0.598881954	0.052626507	0.082846641	0.037232451
0.18779188	-8.818269288	4.161144455	5.577489884	0.559338531	3.287416836	-2.526235795	1.332429718	-0.88813702	0.574395935	1.399374503	-0.171583104	-1.104992267	1.200443094	2.348888601	-2.297668474	-0.613968216	-0.52225676	0.572614245	1.142606668	0.988685357	-0.776497701	0.218171551	0.328939823	0.463381024	-1.375564854	-0.181221069	-1.139738925	-0.472558332	-0.290366616	0.882516581	-0.398527454	-0.221353083	0.059255154	-0.101563151	0.044886835	0.082678495	-0.605879657	0.377123132	-0.074642263
-2.9540721	7.736010968	2.114643607	6.019177717	5.510974842	1.504751848	-0.313330282	-0.267906737	5.971294885	0.541515106	-2.861350187	0.908096391	1.693632564	-1.527859861	-1.686694235	0.362447816	-1.153244201	1.53186265	1.238637027	-0.032662689	0.437401198	-0.404772279	-0.947595088	-0.121097546	-0.263959489	-0.259357878	1.01448703	0.834354305	-0.302322094	1.177827847	0.177957096	-1.635794277	-0.431036494	-0.208811315	-0.070819621	-0.641700569	0.297388402	-0.785149409	0.731447677	0.686518
-0.366371131	30.13337647	8.85366277	10.27255558	-1.383642848	0.091769459	-3.605963333	1.085877154	-5.009410164	-2.438912012	2.669977424	-0.253752357	-1.369431568	3.830933676	-0.678924014	0.963177977	-0.441026478	0.921314753	0.521356726	0.527591079	-2.328729355	0.099050757	0.904582109	0.086468902	0.150286286	0.051957619	0.390329547	0.943855127	0.634529152	0.90807038	0.365444503	0.115211455	-0.814579976	-0.911634395	-0.034383018	-0.778541675	-0.712869867	0.395564894	-0.586729645	0.344496477
17.5163667	-4.430918898	1.703639092	9.044137245	-1.693328668	-3.112573131	1.356756234	1.158706767	-1.255872444	-1.074590305	-0.04014889	0.391622501	-0.419002813	-0.040865411	0.598601252	1.607473162	0.384805943	-0.590694316	0.323204045	0.265632308	-0.261441107	-0.248455709	0.950419403	-0.257758458	-0.160620324	-0.676281949	-0.208281968	0.287150119	-0.212211465	0.315728322	-0.143257796	-0.288659791	-0.24836734	0.705354149	0.349199811	0.419915653	-0.133561531	0.249939715	0.113401443	-0.382050437
12.0212903	-6.24265464	-5.874807905	2.949272792	-6.206846622	0.008335829	2.351400661	1.958969399	-0.525801857	3.29324936	2.006658965	0.755430264	0.082722148	-0.790323604	-0.914773609	0.360318459	0.303545663	-0.382525836	1.805104217	0.767428393	-0.55707746	-0.914708753	-0.907145489	0.77459638	0.340766479	-0.991722737	-0.71147178	0.445857284	-0.551343006	1.171992774	0.273966957	0.179328832	0.375509123	0.345651983	-0.642961101	0.703785585	-0.880894026	-0.758551138	0.536638991	0.223888698
9.369939593	-6.722381662	-1.379080438	2.328629298	1.311433189	3.193293279	-0.904767898	-0.54658829	1.03477725	0.881760311	-1.632362433	2.349950626	0.245638757	1.343469502	1.79132079	-1.182167928	-2.163861635	0.434320051	-0.390053537	0.836370341	1.242953771	-0.261079608	0.503603596	0.469002975	0.29224279	0.201215737	0.68968337	-0.459343115	-0.463291656	-0.775587417	-0.026079383	-0.162563615	-0.09633326	-0.548764441	-0.237588058	-0.047932937	0.301667799	-0.101757128	-0.238037307	-0.125272479
-9.593601685	-5.908907631	-4.792676815	3.527228642	3.672583073	7.124339915	1.732177511	-0.691101029	1.500857588	-2.155578395	-1.726403006	1.204688963	-0.600960877	1.085403135	-0.813782542	1.174695382	1.917917396	-0.026265717	-0.098838809	-0.063651708	2.17177428	0.463283685	1.057826388	0.428893999	-0.858265446	-1.445440868	0.690700944	0.925386308	-0.198141474	0.770274452	0.430482632	0.29071915	0.946494401	0.036803344	0.721032326	0.217616377	0.47580571	-0.096853831	0.245963305	0.71475218
16.44643291	-30.1913652	-5.177606201	4.290324546	4.665154308	1.8316101	2.093602015	-4.222156659	0.331410934	1.959156117	7.484016651	-2.033291077	1.503812203	4.592916508	-2.476067805	-4.546819254	-0.18851462	2.325795945	-1.13222651	4.425860844	-3.082940031	3.838643524	-6.31975307	3.069275525	0.258963832	-0.331086001	0.151066143	-1.00297528	0.995830464	-0.934842089	-1.110998512	-1.26718998	0.999713827	0.522602439	0.182136869	-1.59315513	0.453198178	-0.078253834	-0.179888013	1.088805935
0.455754493	2.264400497	-1.14832389	-0.967330266	6.060997942	0.324009722	-1.998553156	2.231247329	1.659962903	2.048317187	-1.942769162	0.221308922	0.700185929	-0.013966495	-0.183596399	0.671511733	-0.124121057	-0.06994256	0.066005736	1.084079241	-0.717213976	-1.865559782	-1.382251905	-0.472327503	0.34391859	-0.385902608	-0.479622716	-0.325887649	0.570622596	0.206340288	0.00584359	0.307455144	0.052344048	0.264780334	0.281968483	0.025883877	-0.493459635	0.36679404	-0.1216951	0.178802703
-1.525957051	-2.566402815	-1.186326856	6.028728404	4.378228618	-4.034583762	0.059954863	-1.558362511	1.125116123	-0.335746195	-2.451555898	3.849773356	-0.640669968	-2.277194801	0.933078094	0.943779213	0.671620206	0.912041923	-0.421975375	1.334858676	0.147674714	-1.21938192	-1.018183322	-0.092619193	-1.51289452	-0.306663085	0.784173621	0.615536465	1.155004633	0.00214154	-0.375893523	1.431307687	-0.143369236	0.489225474	0.531044041	-0.228241732	-0.216924256	0.113336128	0.209446837	0.2119976
-2.616102293	-0.758886854	0.633166297	0.494898022	0.542222192	1.176347204	-5.423394996	0.601193455	3.16782831	0.223263168	-2.438508028	-0.553298771	-0.192989478	0.095854352	0.496363119	-0.218788378	-0.819647132	-0.120842206	0.771688392	1.3705093	0.107832246	0.228127104	-0.346183528	0.11894802	-1.098908897	-0.948321319	1.316780967	0.512178653	0.575814477	-0.518954683	-0.667921579	0.406232279	0.233360667	0.516652828	0.595040075	-0.925675779	-0.202628957	-0.179999853	-0.167160951	0.40414352
28.41789404	-3.461238088	-4.465186328	1.97670524	-0.265269085	-2.164982182	-1.251980672	-1.439777994	3.288860481	1.627757531	-0.756555139	-1.460333828	-2.05550692	1.695674058	1.490959793	-0.179606847	0.473685678	0.049653817	-0.492290442	-2.189260618	0.164676798	-1.696847517	0.756743004	1.357143863	0.583902263	-0.906790979	1.124111333	0.357050323	-0.186117596	0.554299414	0.144419245	-0.310387217	-0.619857273	0.168168526	0.878423188	0.192825709	-0.548190497	0.882290449	0.087104217	-0.830883491
29.6942387	16.43452077	9.430911413	11.93619431	-2.841380128	-1.919402898	-1.611658615	-1.94626055	-6.374056999	1.934432956	1.506059973	0.292460258	-0.920074508	0.449640663	-0.280791845	-0.608236288	-0.841817498	-2.184602964	-1.285053667	1.037625195	-0.765602605	1.143699874	-1.119571483	0.882813218	-0.106076461	-0.839176157	0.121941768	0.494831788	0.344422873	1.12783847	-0.486967441	-0.990586416	0.527385066	0.247822603	0.13716554	-0.29232616	-0.617766534	0.441062703	0.209525575	0.115396141
7.522865267	-20.10841016	1.450209699	-0.906315463	2.677893719	2.192478644	-1.81587733	2.308208539	-1.045321497	-2.510272287	1.194560349	1.782893073	2.637309143	-0.850660841	-1.41125644	1.784717284	-0.246007014	0.875242134	-0.980344145	-0.118151357	-1.487713532	0.026040981	-1.12160467	-0.623392001	-0.192723437	-0.311720768	-0.682842667	-1.183142202	0.269663695	0.119601868	-0.652889747	0.14077128	-0.044130244	0.536621248	-0.494747841	0.635243181	1.151275943	-0.26497165	-0.247047261	-0.16915348
27.71327539	-4.548803612	4.02151111	7.698044519	-3.576073436	-1.703519101	-3.936557357	-1.711284813	-3.807300506	3.641860521	1.270397672	-1.169903908	-0.690169694	-0.624026129	0.468612088	-0.831879893	-1.686585032	0.206143581	-0.994555487	1.810958731	1.589228819	-0.141579592	0.008707164	0.073579697	-0.214286337	0.391443283	0.484392486	0.034973272	-0.015136175	-0.464403258	0.310390079	0.472420379	-0.122195481	0.432408599	-0.153694567	0.359716708	-0.236505409	0.255190743	0.518399131	-0.763705969
2.103126855	-8.196196611	4.40352213	7.119964656	1.426360977	-3.433132521	-1.831803825	0.809140363	3.750691238	1.661670767	0.78473336	-0.811146904	-0.534456185	0.170414267	0.538588449	-1.012151876	-1.176270721	0.66485545	-0.186427882	0.895075493	0.828299706	1.094692882	-0.211744444	1.152227214	0.101570119	-0.200626592	0.079920753	0.003965694	-0.369272316	-0.05855846	0.258191104	0.007478704	0.088723223	0.021616167	-0.536706685	0.941107263	0.119506821	-0.579781622	0.067863239	-0.802285697
14.44481126	21.48896435	5.914699758	11.58064462	-1.991904918	1.742291895	-1.557443159	-0.228715757	-4.046468072	0.445828775	0.802010759	-0.683571001	-2.032424915	0.818113337	-1.745032495	1.43631394	-0.768170206	-1.359014433	0.513451347	-0.165323496	0.43225731	-1.213422314	0.773835088	0.708346003	-0.259344835	-1.641394519	0.456301455	0.189297483	-0.409927277	-0.197478072	-0.87456213	0.681400413	0.412841937	0.335743136	-0.218655342	-0.800305792	-0.483625149	0.327856059	-0.308829574	0.069370313
2.538449761	-18.67354639	4.48143176	4.586442944	2.190477544	5.02483505	-2.388479879	0.770361655	1.556141438	0.171140519	2.072212257	-0.182424534	-1.083587353	1.401854804	0.299179332	-1.167555824	-1.791947198	-0.16959416	-0.074497918	1.187823679	0.380981253	-0.810398495	-1.479932795	1.416650734	-0.73637166	0.305974887	0.131241401	-1.207848061	-0.742448678	0.608812097	0.59681462	-0.114022422	0.066233718	0.18650178	-0.02879775	0.714711082	0.561863481	0.128863147	-0.320911753	-0.611633296
2.430783261	12.964687	6.84062072	6.592771221	0.706703671	-0.540289424	1.185067438	-1.317093259	2.103389611	-0.318613739	-0.69876949	2.216925503	0.175284862	-0.743142619	-0.888455761	0.017094978	0.719485144	0.442952707	-0.560045865	-0.748250869	-0.536381687	-0.384565774	-0.903628884	-0.795836583	-1.446378577	1.421522348	0.227110324	-1.091782099	0.28814842	-0.229640379	-0.223566458	0.193867493	0.286452823	-0.374422587	-0.248086419	0.556529598	0.242237578	0.022805207	-0.276699982	0.0621253
4.436827847	16.67483706	-2.794973605	-4.206646868	1.905067119	-2.426563419	-3.60700703	0.942727734	2.650883674	0.985412293	0.904873479	-0.338433179	-2.422414629	0.122573489	0.058443273	2.341077384	-0.685490819	0.166088029	-1.128613327	1.099692263	0.926523789	-0.877827481	0.01651059	-0.89150961	0.1617116	0.033171895	-0.123562986	-0.516399432	-0.364771356	0.658464418	-0.105698421	-1.32230824	0.346126423	0.113031882	-0.193747674	0.535144457	0.450731302	0.347436215	0.140758059	0.278002071
9.052957305	-19.29538352	-0.452003619	5.89710756	2.15948101	3.445025556	0.406735592	0.887900359	-2.498084782	3.116900824	1.263012509	-4.396021072	-0.278899575	0.493265562	0.46565247	-1.663232599	-0.955559957	-1.524613913	-2.400426956	0.180089938	0.4965631	1.079028058	0.075714737	0.595469306	-0.468852478	0.419658632	0.494662528	-0.25229615	0.729052237	0.585790214	-0.108607772	0.619126106	0.263773238	0.754908953	-0.175724457	0.203513937	-0.124570698	0.458364589	-0.069400385	-0.136841243
-1.015901298	-3.598119259	-1.315511422	4.083307428	1.783216269	3.344137264	0.982631812	-1.58589525	3.336463737	-2.143594345	-0.136908265	1.487568872	-2.352609361	0.926101852	-2.857355093	0.920710341	-1.447974221	-2.14018077	1.794014488	0.054452131	1.466113313	-0.160477401	1.052855217	0.054618382	-0.554130863	0.393452464	0.090547051	-0.338081211	0.261165271	0.298817751	0.083973906	-0.264248346	-0.145657659	0.522013877	0.298138879	0.227848954	-0.255798373	0.498919508	-0.60592689	0.272903385
3.593361865	-12.1503764	-3.909637226	-1.527531093	-0.091674501	2.839964808	-0.073089591	3.336449699	0.399760703	0.734952497	0.748263475	2.528590672	2.436331815	1.344742236	0.86655752	0.95048705	-0.38470992	-1.927383744	-0.508003152	-0.664856788	0.852851125	0.980939516	1.088005282	-0.620712627	0.107908349	-0.024084723	-0.413590275	-0.69973576	0.137082379	-1.276946045	-0.703056468	0.49266119	0.77265727	-0.205444476	-0.548902133	-0.565916643	-0.428291204	-0.087659224	-0.52442691	-0.042104344
-10.10690293	29.95859345	-8.112107589	1.792664431	4.458984084	4.877080059	-0.364967577	2.214737724	1.079951312	-0.819196465	3.977538399	-2.908502919	2.487563772	-0.69430465	-1.384535725	0.373524342	-0.55943709	0.778229632	-0.252313535	1.07058638	-0.492870036	-0.238680698	0.194385219	-0.387311415	-0.802973419	-0.579086581	0.035002087	-0.375222206	-1.005557772	-0.358226183	1.139879563	-0.457064478	-0.325041813	0.081453658	-0.278427431	0.156864478	-0.041785741	-0.241061855	-0.097530971	-0.418539102
-1.925665101	14.09973041	0.44980442	3.315336651	-0.167202732	3.704919588	-5.390745414	0.05584547	1.152528392	0.214021462	-0.093870509	-0.261279578	1.234190748	1.432343317	0.755148326	0.031643724	-0.478606851	0.637537487	0.441593518	0.470584686	0.460673627	-0.339991619	-0.035819112	0.36677376	-1.794655712	-0.659506138	-1.376655512	0.498866928	1.231765173	-0.530979956	-0.190125351	1.091868767	-0.296391631	0.468405739	0.750996075	-0.097037225	-0.657615947	0.12644791	0.285014655	-0.066670744
-6.979482289	30.38833669	-16.90728056	-4.210856898	11.4153967	-0.982681419	3.664414123	5.246327253	-1.519128527	2.789182896	8.353314442	-1.843913298	1.666583937	-0.74147978	2.828636265	-0.372306388	-1.772886681	-0.560381318	-0.398238316	1.445934066	0.279578625	-0.217341781	-0.147303359	-0.28767743	-0.62361831	1.289427886	-0.37653682	0.900220437	-0.379410784	-0.621019777	0.546819105	0.221695109	0.546284482	0.758426443	-0.308060808	0.142231417	0.351258577	0.406606852	0.042461085	-0.187476355
-10.18770921	17.34086278	-7.713994757	-4.447121989	10.83914878	0.601999113	0.281016425	3.118369306	2.620482984	1.458349575	2.855901691	-1.279621913	0.212950317	0.209679358	1.465390417	3.754315882	0.131833204	2.571962684	-0.318313697	1.622575827	1.323095589	-0.228208434	-0.146388648	0.571171614	-0.188715033	-0.656066556	-0.521585343	0.744400304	1.680375807	0.220382643	-0.023140422	-0.203815948	-0.381960404	0.548661127	-0.423778093	-0.245529611	-0.46758469	-0.160396044	-0.092755322	0.053978589
1.255109488	-4.298062733	-6.166197308	0.373345038	-1.165927035	1.962059291	5.13868588	5.037829222	3.445703289	0.860136005	-1.852263317	0.278085639	0.564115942	1.951106588	-0.389326582	0.033552628	0.351529824	-0.489050368	0.312756947	1.044374729	0.651357427	1.234295168	0.373921236	-0.522593699	0.212903254	2.124496859	0.318217479	-0.63239227	-0.331823634	0.270324359	-0.401693115	-0.23171871	0.268813107	-0.61517216	-0.274040681	-0.438553375	-0.193568886	0.04791615	0.271718572	0.197276648
24.13944397	5.366929655	3.248473348	7.135322842	-3.452455149	2.823164717	-1.177427104	-0.156600108	-2.730001739	4.664375024	-2.240944379	-1.326459997	-3.262150706	0.53052435	-0.617888456	1.345636584	0.524423637	0.83587959	-3.13855425	0.609958924	0.239339931	0.178840021	-1.55221812	-0.326667918	1.128276535	-0.865484535	-0.818354892	-0.05751244	-0.041288126	0.344847917	0.722312138	-0.868919558	-0.177772889	-0.419881814	0.730914876	-0.806488234	-0.13518061	0.009005661	0.370735508	-0.285560209
18.02319137	12.05649145	-2.783243178	3.816088922	-3.161055505	-2.443267191	-0.360420144	1.960427321	-5.553618873	0.514075531	-0.719624221	-0.733847341	-2.839256756	-0.019501131	-0.602794071	-0.329762789	1.386559243	-0.72944431	0.368208437	0.210038178	-0.297426196	0.177493145	0.263529444	-0.166274375	-0.29024543	0.979210472	-0.888399145	1.895954903	0.266935485	-0.232358769	-0.624294473	0.465744824	-0.166471104	0.079382576	-0.169527232	0.340363118	0.315953269	-0.662749062	0.110964109	0.969855014
17.4530615	-11.51108979	-4.608319215	2.124501262	0.829918404	-1.503799645	-0.446390659	-1.53730117	-0.490408434	0.662527167	-0.322256238	0.005567938	0.72704294	0.841701789	1.65383192	0.045614969	0.336809601	0.180563479	-2.339136824	-0.290693099	-0.248930212	0.535173836	0.643821527	1.591644667	-0.35331973	-1.142891069	0.273293948	0.247608463	-0.0767861	0.626474431	0.365960213	-0.256929486	-0.380314508	-0.245067663	0.07799731	0.715156732	-0.213507072	-0.288024771	-0.340790989	0.376220366
0.748855737	-16.19125984	9.069109617	2.584206109	1.523150836	3.830235747	-4.951876819	5.321157695	-1.538206655	-0.671734171	4.804168347	1.221351922	0.096216993	-2.870210807	-0.647242623	-0.853510543	-1.60742082	0.827841607	1.967685668	-0.459638862	0.854755489	-1.904661807	-1.638885938	1.385029577	2.635502426	-0.150509727	2.483444861	0.207568623	1.14707226	0.510731198	-0.64814783	-0.181923548	0.292889125	0.158263934	-0.426554044	0.093490531	0.420522681	0.046736308	0.14567169	-0.442496639
4.558228836	9.528796964	3.483164917	7.0003612	2.452797994	-1.098047861	-1.484795668	0.165601316	3.868618902	0.810353539	-3.491666522	-1.128744895	0.114621732	0.273538487	-1.203389483	-0.114537147	-1.02970057	0.355850912	-1.022754627	0.150365728	0.273194711	-0.023821424	0.175874625	0.205599591	-1.23184107	-0.188801322	0.184984722	-0.876879883	0.52251955	1.056573134	-1.000464172	-0.60421116	0.007108006	-0.360532221	-0.117115804	-0.19207832	-1.105309644	-0.720011846	0.008511852	-0.526327234
0.619710879	6.551362708	-2.979304003	3.091531116	1.796298907	1.845718924	2.917855378	2.460398944	2.991540779	0.967316602	-3.486312441	2.112259761	-0.201752866	-1.259736247	1.420062404	1.635008437	-0.180027498	1.283251377	0.04526967	-0.892842997	-0.230416565	0.177710372	-2.223072534	-0.793116247	0.597944997	0.805127471	1.180978025	-0.573997932	-0.008368408	0.118403649	-0.726013921	-0.031142562	-0.283391982	-0.213260917	-0.066913642	-0.242237061	0.480470342	-0.178686071	0.867120898	0.03600321
-9.338775226	12.88508852	-1.404772444	2.013590429	4.008764044	-4.801030467	-1.288543798	2.075324466	-1.114905746	2.65090834	0.44167445	1.108449954	0.303542123	1.069202955	-0.509823919	1.304763737	-0.26621376	-0.895568861	-0.19087456	-2.065459197	1.311296987	0.936399946	-1.892350445	-0.117775159	-0.160072486	0.960778769	-0.198952159	0.2922558	0.27448561	0.189372999	-0.021882704	-1.005237606	-0.524663026	-0.09936361	0.337646499	0.55188242	0.235056385	-0.125738072	-0.146149427	-0.631134548
-0.238868173	9.880667714	-8.189579904	0.926442893	4.245807617	-5.25882859	1.528381981	-0.293033079	-1.370624693	1.973854844	0.44435762	0.838979489	-1.025818015	0.97322383	1.221222589	-2.025686479	0.021772582	-0.013679776	1.094846908	-2.099441657	1.334411063	0.290055378	0.29743544	0.092526197	0.395837477	0.287449918	-1.07868882	-0.167216519	0.017542753	-0.544049641	0.235167976	-0.015241742	-0.354174767	0.28649083	0.195311996	0.193961649	-0.253380029	-0.511674698	0.318074942	-0.349195347
13.6647071	-15.34593473	-1.121092418	-2.195039993	2.512199781	2.471394278	-3.815441842	-0.161267455	0.891687303	-2.471002267	-1.271246599	-1.812024125	0.510844561	1.85695501	-0.50207263	-0.485570318	-1.295083456	-0.468315774	-0.750478735	-0.235884952	0.802785353	0.790305339	1.924665774	-0.828992062	0.89844159	0.54178851	1.911739442	0.575018796	1.586531332	0.453067695	-0.621075898	-0.552057895	0.473621789	-0.153407046	-0.306551082	-0.053275726	0.205250485	0.415981585	-0.076996147	0.584901352
-8.585989101	8.095766871	0.263414436	5.422843142	1.924545755	7.240779633	0.762918766	-0.723642685	0.126896947	0.736723669	-3.244651717	1.09220062	-1.996757932	1.689712199	0.516485972	0.371110897	-1.798758325	0.04877126	0.505606544	-0.139206277	0.206850133	0.796123597	-1.233959249	0.145895109	-0.764500661	1.017299947	-1.413716137	0.60241301	-0.131966215	-0.588049162	-0.434299471	0.200585649	-0.349734691	-0.614668584	0.624770326	0.238807158	-0.481468284	0.394342286	0.409111965	0.192884376
10.13585935	-21.70827312	1.49004744	7.89973582	2.88743732	-0.993859832	-0.850282938	0.101391504	0.339685763	0.52535488	1.893370043	-1.849179625	3.10021411	-0.260388513	-0.317562196	-0.01491191	-0.671978471	0.714209357	1.215534802	0.373422517	0.869408585	-0.530890959	-0.188345023	-0.893755109	0.451405443	-0.703330885	-0.674628479	1.082044732	-0.232443579	-0.281249942	-0.469707776	-0.36605044	0.44153901	0.897827033	0.343092101	0.032543771	0.108231059	0.096625041	0.626583678	-0.401944281
9.221935792	1.0615805	-5.248225305	8.018729288	2.85636777	0.85506135	1.560179588	-1.211109598	1.952360628	-0.637312424	-0.466922423	-1.352106532	-1.306675566	-0.936617064	0.573378807	-1.345107182	1.810251389	-1.184094826	1.121035782	0.267162132	-0.505753368	-2.395182286	-0.24321681	2.049218117	-0.218036653	-0.05438759	-0.205842972	0.658952373	0.435321763	-1.032568102	0.80857763	0.834766876	-0.012055403	0.012437936	0.740104973	0.173914724	-0.560845108	0.186607136	-0.513499222	-0.250600138
6.98691703	-20.48453285	-2.410946279	3.407151636	1.017513985	2.154782765	2.466077567	1.500613337	1.223954017	0.576779529	0.526017001	0.908523344	0.402640611	-0.499666265	0.226140507	1.483819542	0.226930462	1.403633506	1.89000894	0.613474295	-0.816860915	-1.46933734	-5.88E-05	-1.272065511	0.120592416	0.794224968	0.089403559	1.200907337	-0.400799682	0.545901301	0.347298515	-0.007393073	-0.630721373	0.265708242	-0.698781042	-0.320105602	-0.102655088	0.09475819	0.276775296	0.684069422
2.362113593	-0.741678654	-1.830673141	-2.088072933	1.226808936	-1.757863757	0.514038165	0.372400044	1.988577099	2.475696111	1.556259729	1.530822928	1.439597085	0.199610909	0.003309507	-0.496477561	1.210377901	-0.526788839	0.344763361	0.908399347	0.213636769	0.892370372	0.693453725	-0.75203364	-0.043023041	-0.94612694	-0.225626434	-0.061103655	0.398618812	0.314372354	-0.569388601	-0.595387898	-0.297647858	-0.985309501	-0.616375871	0.109846963	0.531076653	-0.339706638	-0.397732555	0.681856291
5.091449654	-19.45012819	0.100438325	0.179154042	0.514471467	1.628913646	-0.101497024	2.447361104	1.302882951	-1.444144106	2.498647637	0.716057539	-1.162545303	0.74289868	-0.209884066	1.584034186	-0.695103778	-0.508998721	-1.508761165	0.253101011	-0.603667432	-0.005504372	-0.526693483	1.745496912	0.311250022	-0.584273089	0.16596144	0.351546002	-0.442621146	-0.287921466	-0.28938188	0.683659295	0.18800472	-0.231721222	0.463472759	-0.442253843	-0.210952104	0.624545304	0.307866231	0.363829174
5.136500348	-12.40972647	3.533164774	-2.118143959	-1.567552624	0.759431523	-1.59018501	-0.851590363	-0.717799558	-1.425873056	0.871216873	-0.68755318	-0.936870876	-0.404751153	-0.545786427	-0.056796075	0.356815663	0.557538	-0.281975226	1.298584184	-1.411083282	-1.2516054	-2.212807402	-1.325220152	0.286486038	0.655649202	0.443885904	-0.365722317	-0.575982228	-0.151417207	0.077404225	0.15765568	0.805266758	0.193232915	0.320196297	-0.204309383	0.141146866	-0.250437737	-0.088946563	0.095221894
6.073477485	16.72024293	0.547822391	3.427834356	-1.428530456	-2.385059855	0.521000265	4.296812727	-2.119584873	2.677104021	-0.453622883	0.070017694	-2.076238681	2.047708698	1.155758889	-1.900052142	-1.984868126	1.504106454	0.126592828	1.238723333	-0.239069972	0.00388691	-0.196845433	0.596209223	0.80953203	-0.673376915	0.316362022	0.126770747	0.086799417	0.386153415	0.160324201	0.393644463	0.012413447	-0.058183864	0.003545987	0.493404978	-0.150620946	-0.524513444	-0.573176289	0.160188121
0.468931728	22.54580635	-6.937085293	1.127952881	2.975121016	-0.901616063	1.192289165	3.320527459	-0.349039115	2.816598089	3.976955227	0.419431805	-0.575456325	0.596618634	2.202002405	0.16329098	-0.521470773	0.837761192	-0.162221482	-0.187306922	-0.86626691	-0.121310377	1.484651825	-0.611692604	-0.085628695	0.106924273	0.12556905	-0.327287298	-0.206483168	-0.062474097	0.159650532	-0.68742395	0.710271956	0.050513658	0.077166175	-0.02541001	-0.668691228	-0.425480652	-0.36440661	0.148421069
5.594090883	1.809937725	-0.881101067	4.729051364	-5.46073141	0.778285482	0.971281622	0.619391268	-3.828851127	0.157865138	-0.391060166	1.179111287	-2.030035713	1.345037085	0.358856075	1.08577635	0.101760127	0.427484743	0.550590277	0.43610209	0.381351118	-1.876351546	-1.177016014	-1.177536326	0.10928374	0.835954591	0.902949354	0.6850554	-1.908963871	-0.014653683	0.322845765	-0.079705792	0.273421044	-0.973207909	0.386364142	0.164084434	-0.599403899	-0.081053744	-0.359023055	-0.097715174
-8.022713863	-7.55103471	2.024097494	5.379943882	0.865871813	4.680191836	-1.277550581	1.841161904	0.76752967	-0.410521244	-0.250303024	-0.356209714	-1.780429482	0.150039729	0.761648334	-0.240729234	0.566940665	-1.327579581	-0.064924662	1.449050063	-0.533680482	0.857235513	0.283472398	0.219738101	0.584382163	-0.935698948	-0.736022233	-0.013796677	-0.664371121	-0.618592572	0.044782057	0.179844648	0.265186887	0.36797291	0.609326125	0.131919932	-0.134018238	-0.061456151	-0.370422324	-0.313527446
-1.744873914	22.31016022	1.540927473	-0.790014571	6.91509154	0.363364276	-3.666322329	3.454650465	0.185919226	-1.324162869	-2.835057287	-1.796443115	1.555227732	-1.776769437	-2.736320436	0.248357762	1.624519888	1.411876002	-0.534074635	-0.592566952	0.889184276	0.151660482	-0.400113868	0.501772721	-0.309049291	0.678763372	0.222737294	0.681063469	-0.750300306	-0.624545003	-0.282903139	-0.420565064	0.388144447	0.527134717	1.129987504	0.000384493	-0.484999642	0.026881741	0.106995846	0.161232515
-0.990943028	16.21122489	-5.898229064	-1.621836606	4.1418726	1.649859026	-3.478268778	-0.96174633	0.331656511	-0.060645487	-1.257478417	0.058180535	0.110189325	-1.167939216	-0.13169675	0.41058091	-0.683237702	-1.302750235	0.339051885	-0.392115638	1.348175099	0.61700799	0.140776619	-0.633589942	-0.125992324	-1.083213027	-0.224121876	0.186024969	-0.231049747	0.381783605	0.190753455	0.663578494	-0.449263454	-0.588746852	-0.409969966	0.136168392	0.517467809	0.49726921	0.374100508	0.676339749
-9.215806638	26.45601741	-7.346982127	-1.924923275	-4.213665314	-2.194784461	-8.1951592	5.205435667	2.44137901	0.161397144	3.174679404	-1.445426256	-0.065521693	0.469286937	-1.870103915	-1.658578669	0.860874116	2.520501731	-1.331025749	-0.382856212	-0.314612886	0.889123931	1.573898477	-0.516249081	0.403722101	-0.587148206	1.573298094	1.046675241	-0.406561632	0.47354572	0.288919144	-0.569887962	0.09277995	-0.485016906	0.289954546	-0.125126383	0.02605348	-0.121632636	0.358154687	-0.129942694
0.120718119	-16.82000182	6.620109458	11.32076771	2.276520857	-0.783285992	5.451285666	2.303191427	3.302966	-2.093751687	0.206115217	-3.526669421	2.165047592	0.582725206	-1.368392326	-0.235127559	0.110953713	0.014953726	0.441418117	1.087347681	-1.038208602	0.853619713	0.714398802	-0.287784482	-0.444826835	1.026373671	-0.092854237	0.246477264	0.033013666	-0.877267415	-0.038447335	-0.561413749	0.462255284	0.416469795	-0.204871671	-0.006353179	-0.347759934	0.132367785	-0.071542168	-0.355046832
-1.015572092	12.48954619	5.327930144	1.264029618	-4.20114366	1.065806606	1.638751413	0.601877126	0.152384511	-0.428539545	-0.973466474	0.555350133	0.133003471	1.048095724	1.035198378	-0.030186602	-1.423756197	0.537949482	-0.10245367	0.896161588	0.104459633	-0.140750936	-1.513425295	0.123261378	-0.031228745	0.367624871	-0.875164012	-0.17495872	0.82527744	-0.26902544	-1.122256281	0.300710557	-0.125801115	-0.303951691	-0.267545915	0.02936693	0.032271569	-0.595406923	0.456126528	0.206091831
9.832685061	11.28519125	5.440014765	-2.055425341	3.512313726	3.395093129	1.078774358	-0.044454752	4.051278204	-0.252462128	0.596430347	-0.411994943	-1.667601138	0.61809156	0.39564097	-1.014538231	-0.195893165	-0.019941664	-0.349078876	0.678719642	0.152681543	-0.643054129	0.322610416	0.509247123	1.135250074	0.319694623	-0.81684678	0.291604132	-0.292527946	-0.687400283	-0.714080878	-0.807861175	-1.148359582	-0.43102281	-0.275482054	0.142934052	-0.192662878	-0.136875033	-0.272761186	-0.090065172
10.37127785	4.249122407	4.991045818	1.824231389	0.672278269	1.380950878	-3.243015919	4.476530912	2.902534184	-2.835463147	-0.83237529	2.114826385	-0.870825499	2.289699468	-0.569251258	1.035273759	1.081886267	1.211526624	1.009570364	0.29138988	-0.725458063	-0.930078082	0.21964176	-0.824710798	0.265079526	-1.057302438	1.015202597	-0.129795192	-0.089361473	0.455419755	-0.31583036	0.567546535	-0.407957603	-0.016810181	-0.511685235	-0.708676731	0.396634019	-0.26388471	0.021771235	0.014950178
2.863854258	21.55153877	-7.128764717	6.082253271	-0.915674755	-10.03901146	-2.567024357	5.146582301	-1.268831249	1.20628556	-0.916166357	0.356877547	-0.180773533	-0.439551919	0.602379537	0.842772082	-0.010925862	-0.160322305	-0.300122173	-1.231819722	0.027766666	0.577834059	-0.723816134	1.439863409	0.208507983	-0.425904084	0.840415292	0.457350962	0.161885408	0.308807362	0.63768192	-0.833616777	-0.073395389	-0.110315785	0.301855996	-0.089729405	-0.010902306	-0.766257644	0.76606952	0.302791631
2.462137745	20.87600381	4.707063382	3.37583735	-0.494832434	-0.683353427	-0.699419233	-0.531762523	-1.775371645	-2.2792886	0.824130341	1.381676787	1.78932726	0.282163827	-0.672847652	-3.141651495	0.422488974	0.280460543	0.436281397	0.49995396	-0.116769334	-0.893550003	0.098984056	0.179178728	0.454342131	0.300107394	0.672041046	0.314678454	0.443313515	0.027040677	0.443657328	0.714806119	0.34958583	-0.10458724	0.054878022	-0.272612746	-0.640868127	-0.583312945	-0.246483689	-0.691444051
4.079473525	-1.674404508	6.48779116	-0.016693566	-0.639928658	-1.225691566	-0.144574888	1.375276274	0.781092863	-0.313246747	-0.257482729	-0.436178386	1.00534729	-1.973645459	0.804050928	-1.292766897	0.472179553	-1.279490071	0.17168353	1.030915694	0.089682227	-0.448744145	0.006127143	-0.785183799	-0.482560771	-0.333199333	0.241372861	0.50144324	-0.127392644	0.200825167	0.676964872	0.335381622	0.003257257	-0.45188256	-0.142561023	0.530552363	-0.308429377	-0.084578828	-0.332300216	0.098397162
9.06593718	-0.424615021	-2.447027985	3.103184921	0.491006151	-3.627925892	1.095946154	-1.397937961	0.495259416	0.9094168	-2.453246912	-0.362009236	0.675511126	0.913612687	2.175736428	0.626554322	0.238601554	-0.62426784	-0.208135367	0.733543214	0.54136298	-0.787142487	-0.361440916	1.35690438	-0.444513546	1.518622692	-0.289142762	-0.112262168	0.953883493	-0.415065698	0.073695369	-0.383680545	-0.807159551	-0.082818575	-1.108209341	0.60270205	0.491807565	-0.02551038	0.490229895	0.089471976
1.139832009	3.116308795	-0.213563923	-2.113602049	2.06618285	-4.647257332	3.284416981	1.331193385	-2.673575949	1.760449888	-1.359179671	1.289226806	1.280659217	1.489432418	1.315939036	-0.517577301	-0.368127476	0.764540558	-0.235758272	0.920373692	1.9012443	0.972390426	0.994811816	1.233887576	0.209474787	-0.472055663	-1.159115557	-0.288161384	0.905275157	0.348705211	0.189408762	0.689981625	-0.788497883	-0.304532437	0.027532573	-0.027512787	0.069337095	-0.545797358	0.300410343	-0.289028509
-6.529909963	29.0463697	-2.328547085	-0.599190599	0.397729234	1.563429206	1.847160425	-1.671084309	0.643792206	-2.290196131	6.700661619	-1.449296844	0.469322403	-1.59455148	-0.343487508	1.003325098	-0.825750781	0.192576708	-0.385398182	0.278193321	-1.053586377	-0.937465846	-1.374408814	-2.037949836	0.021078612	0.067399082	-0.335091575	-0.219648522	0.143478103	-0.900653947	0.350820127	0.009639774	0.43725427	0.231230543	-0.137214641	0.064010304	-0.514708211	0.141755431	0.193808333	0.012673393
-1.917409675	12.71185769	2.257789776	3.387740623	-2.802823913	1.339508982	-3.289848053	-3.948334398	0.139065367	2.89884921	-0.421916463	0.536824684	2.872435993	0.023529045	0.108215076	0.002132488	-0.937378435	-0.003182496	1.904282288	1.58567667	-1.45070188	0.170243218	0.627375639	0.026946972	-0.282600251	0.298536787	0.083082474	-0.621608905	0.694176814	-0.002067811	-0.126365515	0.274260351	0.455143487	-0.291427598	0.009637315	0.260844272	0.060104531	-0.516703527	-0.087943132	-0.15706367
3.627491257	3.648104438	-0.339020804	6.604304887	2.205374501	2.080068807	-0.862358072	-0.574753925	2.315553991	3.063433252	-0.7224158	-1.73610401	-1.018106391	0.58276171	1.351118424	0.41388514	-1.273893158	-1.755659096	-0.089604047	-1.097663902	0.200821127	-1.324544306	-0.174660923	0.133522868	0.557614577	3.153549477	0.219886317	0.147758	1.241577393	0.845300732	0.789594455	0.25601115	0.624834883	0.068954075	0.574077626	0.366004642	-0.537966596	0.385236857	-0.244512205	-0.345715113
3.835817507	-3.596475199	-0.830964889	0.543788285	0.824717462	3.509588563	1.880186016	3.006459395	2.260126829	-0.307106256	-0.016775895	-0.101613136	-1.543721087	-1.793387289	-1.253866415	-1.521439108	0.879438181	-0.612100458	-1.164077114	0.886981048	1.173826996	-0.029126552	0.873367135	0.250785243	-0.255294804	0.291441558	0.563869298	-1.590357442	0.274914014	-0.115891554	0.08464942	0.482274883	0.57493626	-0.448808198	0.010502461	0.148863068	0.216839728	0.432355492	-0.212366644	0.330001861
31.01832883	-14.72586564	-6.853245749	-1.563915123	2.459177481	3.254451779	0.221647164	-2.01099051	-0.40027745	-0.057239049	0.086828664	-3.592015033	0.643985403	-1.54983052	-2.914662838	0.747118133	0.134766742	0.505398488	0.081108488	-2.435545814	-0.360443612	0.775041989	1.679610112	-0.99687167	-1.384466858	0.396299572	-0.244056604	0.718660556	0.225892506	-1.07209458	-0.065206568	0.559035022	-0.801640167	0.311458035	0.01228574	0.371182281	0.406620757	-0.233672406	0.574316504	0.056838083
-2.753841905	12.07619694	2.368383108	5.654237468	0.330896248	1.919000229	3.045437695	0.439527428	0.09551755	-1.569672228	1.193066686	-0.076201814	0.816390095	0.41268087	0.422922352	-0.83160662	-0.345918478	0.847369615	-0.295866058	-0.138240433	-1.897478172	-0.826276499	-0.393769386	-0.842837196	0.402529889	0.880939847	0.256181576	0.196005007	-0.511709923	-0.116634508	0.140302808	0.407377001	0.003068103	0.08340818	-0.178184975	0.002875461	0.396897467	0.834690582	-0.144870542	0.213017823
15.2292851	9.326319772	6.314363251	-2.292592329	-0.389735863	-0.745008537	0.511072037	-1.147123137	-0.357922984	1.116006821	-1.110510118	0.347874812	-0.625964837	-2.092056813	1.227027673	0.243729842	-0.807796135	-1.218891033	0.480055766	0.264410455	-0.164937825	-1.095709492	0.014200067	-0.392907603	-0.627450796	0.233266293	0.652259063	0.522983124	-0.053809598	-0.017240522	-0.770299417	0.579423638	-0.762160517	-0.062562861	0.28857144	-0.94958106	0.012272927	-0.011198787	-0.265482776	-0.335740322
2.499332077	41.04191352	-3.636651425	0.527368624	3.095516312	0.579808757	0.198870422	1.441098676	-1.315222222	-4.374780324	4.334247264	-0.586707858	3.572792506	1.224169731	-0.884750004	0.046366997	-0.018231186	1.592765169	-0.95023349	-1.177665422	0.260041591	0.2297523	-0.768464279	0.148733193	-0.238514677	1.256509665	-0.360050992	0.351154495	-1.15535132	0.506838136	0.76467847	-0.858798689	0.656353626	-0.093682688	0.387962189	0.107621012	-0.44382478	-0.311611503	-0.353325083	0.222551264
7.439491631	6.973746613	0.996716793	3.840834145	-2.679204763	-4.621302713	-0.054548375	2.243475699	1.513922026	0.662458244	-0.786969764	-0.89290986	0.198025365	-0.103755307	2.444717964	-0.277070941	0.790370191	-1.766592397	0.780830075	0.652772748	-0.361269332	0.156063866	-1.307283216	-0.248930013	-0.137911377	-0.648007001	-0.352933062	0.404121475	-0.389073811	-0.589206598	-0.183084836	0.222501058	0.919338192	-0.344952584	-0.273486721	-0.252189862	-0.418024056	-0.329962897	-0.141508677	-0.156839324
-2.006740809	-10.58687447	-6.601725366	2.845159244	4.656070379	-4.585199784	2.557818002	4.173094135	-3.965791048	1.414597913	-2.031111234	1.08226978	0.77034161	0.524351027	-0.461160323	1.246126674	-0.966146686	0.450230987	-1.087025192	0.453029723	-0.466042962	-0.496462924	1.30925131	-0.717558584	0.771127293	-0.707532074	0.035930562	-1.094135379	0.754009517	1.104674033	0.838138577	0.009850697	0.600296739	0.738792538	0.606645433	0.778031145	-0.181753209	0.176158871	0.3139906	0.259751445
-2.747454272	7.894002976	-3.522542655	8.830103582	-3.554494859	-1.414499716	-2.687543927	3.749132724	-2.433877529	0.085237164	2.111171824	1.48955055	-0.156915996	-1.482806388	1.073315154	-0.063357794	2.272750693	-1.493653724	1.890103306	-0.729266818	0.486226553	2.224676299	-0.050344655	-0.831820601	-0.000622802	1.427536195	1.406327816	-1.744285057	0.17788504	0.104294008	-0.08574655	-0.18719344	-0.047548549	0.052542043	-0.058551446	0.254335999	-1.234029727	0.132865651	-0.751033732	0.20352376
11.09330563	-4.95708982	-5.378804896	-0.738289486	1.18449219	8.017167839	-3.018381948	5.112755689	1.717722197	-1.525068219	-2.09475705	0.354334584	-0.104622933	-0.977617523	1.546869573	0.796681111	0.934120695	-1.323147412	1.90075278	-0.21985439	-0.856953467	-0.318388661	0.012769946	0.766764193	1.187587162	-0.086369906	-0.199000376	-0.679972944	1.34316608	0.277495915	-0.077463623	-0.038251971	0.080722537	0.226087126	0.224815877	-0.448647672	-0.332494242	0.502618687	-0.551990822	-0.296086472
4.693970307	17.26047562	-1.179472629	2.100329057	4.82998458	4.23907471	-2.96451371	8.603624557	-0.123611312	-1.419024139	-4.358742068	2.626326522	3.742920492	2.32276241	-3.180113004	-1.221617052	-1.762042278	0.969185126	-2.230064542	0.246843938	0.406466064	-0.236882314	-0.464788902	-0.462483876	-0.99993834	1.152803922	-1.376332204	-0.141664569	-0.444331493	0.473901333	0.278916381	1.009205923	-0.065823431	-0.390364845	0.606684274	0.476164186	-0.251153164	1.562903035	-0.927570642	0.495828037
7.565920243	19.61413237	-4.090701458	-0.324499493	-0.624494837	-0.030982399	-1.646893627	1.892070583	2.060903439	-1.285558359	-3.315311314	1.251675761	0.81206109	3.267951688	1.124927422	0.324124434	-0.477576127	-0.406603766	-1.077346853	-0.448547025	0.777977079	-0.628459953	-0.554558869	0.860297509	1.140673803	1.263686678	-0.097531744	0.26368254	0.273755379	1.465349183	-0.212287449	0.920557686	-0.034260698	0.152492153	-0.271717994	-0.226927702	-0.370580337	-0.20703259	-0.545755813	0.453966685
17.65667904	-16.80124274	-7.416090414	-4.537942443	-0.965719891	2.241354636	0.04100392	-0.422384338	-1.402811913	2.020706518	1.433439711	1.648618199	0.710342922	1.523496123	1.592971483	-0.344295985	-0.890914952	0.493896522	0.39943459	-0.974647257	0.021039746	-0.169361231	-0.636936383	-1.490434542	0.18554689	0.479295267	1.124675168	1.426749371	-0.317764229	-0.074507103	-0.098716307	-0.027969422	-0.149066711	0.342064937	0.37293538	-0.36477623	-0.07817933	0.109958099	0.397984494	-0.348835252
7.020903268	-5.519557694	0.564183829	-0.611674063	-0.161645869	-2.552515599	2.018219305	-1.543768359	-0.711979511	-1.477427859	-1.516483933	0.289866671	0.025710108	0.99340091	0.793967907	0.83427831	0.051038647	-0.448525224	-0.817190073	0.692347362	0.530271995	-0.69752156	1.275976586	-0.684245409	0.757024145	0.656149014	0.282323619	-0.330364259	-0.594203665	-0.529894099	-0.094794294	1.108091175	0.388397902	-0.376340999	0.239588077	-0.292036492	0.06354031	-0.318666013	0.498268641	-0.118562016
-3.228231436	16.98089036	0.572833979	1.455757032	-3.851729347	-0.368538554	1.118586182	-0.941573893	0.244933332	-1.186219304	-0.410674351	-0.618255062	1.139362723	-0.398527398	-2.645170066	-1.907457973	-1.473086522	0.115591907	-1.019865744	0.118278294	0.046891472	-1.076290912	-0.388536093	-0.115388176	-0.180277994	0.140388297	0.664406853	-0.587039812	1.277203664	-0.130750007	0.694115202	-0.198189523	0.02995723	0.118665953	0.540395791	0.405942416	0.33773713	0.535486011	0.364810262	0.216025493
6.031555305	-5.880074116	7.468447656	2.58610537	-0.418807754	0.696110525	-1.371416902	0.436709389	1.197280526	-0.286704962	-0.052380598	-0.364645932	-0.185937116	0.438690114	1.60635134	-2.689994468	-0.075059035	0.839164223	-0.636450404	-1.06978893	-0.585761216	-0.753521934	1.262247283	-0.173192432	-1.5589907	-0.276793373	-0.420847181	-0.388918834	0.530839554	0.762130739	0.293763961	0.941898709	0.523849197	0.649331354	-0.011546374	0.484363784	0.103470974	-0.288480317	0.872337655	0.199690662
16.09625199	-7.150180953	3.076680045	-2.71367131	0.746683187	-1.609403616	-4.477454487	-1.175953639	3.017319665	1.06206584	2.336696566	2.196322532	1.302950218	0.727980563	-0.464557223	-0.042002983	0.495211164	0.749140939	0.951053641	0.211737811	-0.64355532	-1.150509472	-0.350618273	-0.421636636	0.598478714	-0.652971494	0.030977934	0.441691325	-1.352991849	0.411060334	0.749024543	0.832642	-0.956946828	-0.32794752	-0.076526789	-0.351935416	0.06860862	0.647291864	-0.407096399	-0.309611349
0.688900926	14.42970767	7.044166889	6.715198091	-0.287582427	-1.824696306	-0.421431383	0.232083217	-1.433421904	0.353135812	-0.923831692	-0.649393299	-2.812548307	2.379520064	1.865877829	1.544369684	-0.549070148	-0.68287142	-0.612318285	0.998597235	0.737018261	1.23475554	0.435912372	-0.231281698	0.249387107	0.963779912	-0.056567249	0.367521204	0.633370435	-0.269712427	-0.26119947	0.569716977	0.176665487	-0.497683632	0.934791306	0.240720132	0.474437451	-0.16073885	-0.166052833	0.320898769
10.57241353	13.18716612	7.513843358	4.822442482	0.556814678	2.565861032	-0.890551851	-3.249658823	-1.953684199	-0.920563724	-0.204473482	0.479036005	-2.054110379	-0.574155917	0.655848384	-0.663759298	-1.392715133	-0.558596242	-0.210079741	0.585995164	-1.225361649	-0.28585005	-0.718986188	0.497756726	0.137691837	0.587107345	-0.310633815	-0.331393804	0.292757638	-0.051063554	0.594793855	-0.570325409	0.144965055	0.063196646	0.470342977	-0.079112295	-0.352230746	-0.084281429	-0.207826383	0.199380887
5.136249228	6.714524747	2.325970109	-1.181482282	-1.141597417	-1.045786423	0.065657948	1.150331941	1.547697606	-1.961214625	0.86870189	2.371351042	2.023617651	1.168533101	0.765268523	1.412301949	-0.016332867	0.284612361	0.454418233	1.485733657	2.496225094	0.035058251	1.934906256	2.604811546	-0.233714468	-1.314127555	-0.172861037	-0.253061555	0.157511934	-0.594558285	-0.122264671	0.620394658	-0.039158804	0.249257622	0.295852767	-0.511689289	0.059887496	0.310450791	0.014807276	0.427737228
6.255555013	-4.311600877	3.287298091	1.455201013	1.707522773	0.358473602	-0.609117731	-2.766104987	-0.325161794	0.951574474	0.047440523	1.899846669	0.978373492	-0.41113337	0.755618422	-0.545378748	0.026487265	0.937407158	-0.280425646	0.269165555	1.206351252	0.278620578	0.485634525	0.255959253	0.709114991	1.224508759	-1.472906065	-0.321956326	-0.004501725	-0.350751877	0.17656792	-0.199942254	-0.662758054	0.227212627	0.060313932	0.30602944	0.178018363	0.057485562	0.263951096	-0.18501693
9.506419058	-10.67881876	2.546379952	-3.671605051	-1.363207544	-0.665897759	-1.856277006	0.563853608	0.887970225	-0.998793883	2.641751278	-0.639467526	0.538646436	1.006793133	0.362980757	-0.344520453	0.366972377	0.18226235	-0.545591727	0.690154608	-0.86336275	-0.107343409	-1.290099292	-0.512294166	0.356978277	-0.080128935	0.357002777	-0.627752283	-0.336237877	-0.267419716	-0.137643135	0.338296288	0.921209945	0.625653391	0.135199174	0.007916243	0.000389125	0.225666381	-0.149327394	-0.166660429
5.35454871	-7.503948319	6.933593962	1.009230826	0.113451484	-0.227739384	-0.321760721	-0.033169047	1.986973538	2.298097053	1.653611347	0.965097031	1.013432826	0.662608636	0.352248499	-0.471707368	-1.985189148	0.481118527	0.845220995	1.595006931	0.885320204	-0.254875637	-0.282195651	0.36515645	-0.318713824	-1.251575107	0.643945079	-0.630602807	-0.156212024	-0.153093667	0.941720012	-0.101461802	-0.198158661	-0.229627496	-0.391295988	0.493074066	-0.220429818	0.320277911	0.341144464	-0.214495979
5.984026396	-4.042296323	5.395981831	5.451531567	0.905207909	-0.341795902	0.448138466	-0.787538335	2.843793308	-1.647765748	-0.432946506	0.091268144	0.524720031	-0.335991023	0.343231184	-0.438548576	-0.261574751	-0.486314553	0.092054007	0.642535103	1.252105531	-0.033362768	0.719419196	-1.008955526	-0.160862162	0.228927715	-0.037208188	0.076123135	-0.649636852	-0.00282106	-0.393997912	0.573878767	0.711407531	-0.146327127	-0.906842993	-0.034166648	-0.395364333	-0.511134342	-0.265754881	0.223648427
6.91513865	0.011531926	3.674833962	0.301681799	-1.220231339	0.017554349	-1.502787406	-0.049403167	0.358312395	-0.781353168	0.443848173	0.467769662	2.175290788	-0.024361002	0.702339854	-1.337482427	-0.699416997	-0.245724667	1.180856639	0.519989416	0.102599436	-0.42091766	-1.332801882	0.922144326	2.01453811	0.604479582	0.1577122	-0.080594936	-0.043439776	-1.239038801	0.685648749	0.112653188	-0.363998127	-0.693737828	0.137809685	0.758528596	0.147241106	-0.107898744	-0.114655789	0.012456922
1.374862211	-3.77816581	0.814559913	-0.337094025	3.152697495	-3.586076497	2.275355555	-1.346598626	0.57425203	0.825583609	-1.352004604	0.163835766	-0.682481323	1.32057257	2.397373877	-0.604973266	0.543519189	1.026854403	-0.149980661	0.120045983	0.94951762	-0.150565169	1.078608761	0.540183573	-1.124077392	-0.249288537	0.978565708	-0.301591374	0.431656689	0.427660613	0.40725117	-0.514659532	-0.322481791	-0.122535775	0.472275627	-0.058124877	0.349376289	-0.21171937	-0.122372508	0.18718462
-2.747765505	-0.224891549	5.634572564	-3.46985764	-0.007114647	-2.550860043	4.966327353	0.22689763	0.966796539	-0.852596243	-0.54189865	1.458093373	-0.330108698	0.068813054	-0.557176257	-1.112323487	-0.124062427	0.391803542	-0.016622609	-0.451292521	0.222557485	-0.085689101	0.224006312	0.820512048	-0.670909203	1.630721051	1.154775785	0.687978945	0.347598877	0.694803699	-0.115588907	-0.623991147	-0.461153132	-0.573812525	0.139701755	-0.377717392	-0.398567328	0.175681389	0.549658007	-0.115801325
0.617373782	5.885706449	1.575491782	1.025098093	-2.114743196	-1.605147345	2.442256493	2.153260399	0.930335676	1.476278503	-0.067224064	0.599187183	-1.0958841	-0.634044792	-0.334580792	-0.214241481	0.290048351	0.668540763	-0.774075714	0.490783631	0.282289784	0.845784147	0.516511187	0.223770916	0.981736441	0.0648625	0.389506564	-0.448224736	0.249875969	-0.494803381	-0.073343392	-0.275030152	0.472234488	-0.010371255	-0.291423187	-0.348444867	0.405842103	0.182450117	0.1499209	-0.107670326
2.463183005	-5.267806037	7.184555163	-4.938151571	-0.307345485	1.706965673	3.876871013	-0.123466624	1.83732076	0.692792369	-0.331388491	-0.485639614	0.379736043	0.865699108	0.832890813	-0.234186455	-0.4262822	0.168003165	-0.731271614	0.168554032	0.724321057	0.763980576	0.063554854	-0.286551279	-0.140454202	-0.282809495	-0.3100116	0.021153192	0.377954054	0.351935403	-0.036917635	-0.115635956	-0.347209417	-0.55967078	-0.731971696	-0.066645581	-0.143320424	0.260753818	0.025719426	0.12364804
1.819598454	14.63888582	1.499999983	0.463658495	0.503006166	1.492970005	2.336315246	0.684457402	-0.567230608	-1.671308722	0.526452862	-0.004541077	-2.835274524	-0.743113912	0.807356251	-2.061122754	-1.81575427	1.411744382	-0.818036258	-0.820781539	0.267430791	-0.59086171	-0.479432169	-1.001569697	-0.399457204	-1.117326522	-0.864961133	0.360620482	0.047144853	-0.495208985	-0.171408604	1.033840839	0.054104047	0.393132918	0.363528835	0.128842678	-0.165589728	0.227534292	-0.145203966	0.229541953
18.96860451	2.824469881	3.187278721	5.209513352	-2.095352551	-2.972386721	0.54216076	-0.365303127	2.192997949	2.184339664	0.077953667	-0.772873444	0.285900422	-0.186554207	-0.034628033	-0.785956468	-0.365826359	1.44634634	-1.364267237	0.566404664	1.121335296	-0.05789524	-0.601849636	0.98795883	-0.77392627	0.733161419	0.568847261	-0.440927489	-0.263832641	1.282305913	-0.304719023	-0.620786902	0.192103954	0.324827401	-0.306260619	-0.239820841	0.089917038	0.334040673	0.363705577	-0.255123015
-3.949189703	31.55622816	-3.962870502	3.475300393	3.603940576	8.745257351	0.672217386	0.820011942	2.17422133	0.786236567	5.272655309	-1.827880501	0.17284558	-0.397212521	1.201656899	2.249464798	-1.693663605	0.120526318	-0.525122885	0.444105227	-1.259703769	0.125158026	-0.323570757	-0.68121429	-0.852425094	0.758812152	0.126642543	-0.74799211	-0.408459765	1.544660752	-0.764229083	0.180662137	0.231855366	-0.413763575	0.197222999	0.339725255	-0.360979683	-0.417749412	0.730215185	0.244421596
-5.5680384	-3.07127018	-3.494186139	5.365418326	-2.019346288	-3.951492754	2.41946747	0.163187372	2.503889975	2.189701716	-1.155334076	1.121645049	-1.084941284	-0.997505569	-0.950669366	0.542019524	-1.186344466	0.175880633	-1.510277297	-1.118287983	0.715944859	-0.27890998	-0.708716141	0.996220246	-0.334160626	-0.023035165	-0.120616715	-0.568404698	0.925321546	0.181585083	0.295694683	-0.151252477	0.079497146	0.076259637	-0.469033516	-0.370171588	0.014153588	0.168612605	0.395724941	-0.269369694
-5.642788964	15.26688129	0.21693301	2.468239442	2.121641301	8.807595469	-0.787460449	-1.573465479	-0.154601846	2.173730535	-0.275696407	1.283134041	0.619471419	-0.845540438	-2.566364355	-0.322100449	0.035351167	0.736697606	1.23355088	0.611310796	-1.642620347	-0.581142098	0.030483202	-0.467790823	0.699967106	-0.098110677	-0.520758278	-1.024620201	0.174020912	-0.329925137	-0.541671835	-0.071905612	-0.718343543	0.100221544	-0.33443532	-0.045356887	-0.24259185	0.352169979	0.315551937	-0.171089802
13.48803905	0.204172042	-3.04430473	-2.252503321	-5.339979525	-1.713843318	0.083110078	-0.00326396	3.787715778	3.388666419	1.288806154	0.271461363	0.337638886	1.791287118	0.354585501	-1.555506822	-0.031958571	-0.429220453	1.345006748	1.153775769	0.563061471	-2.412010841	0.585722536	0.048385204	0.50153185	-1.137704938	0.303691085	-0.341436261	-0.505881109	-0.279954767	0.690049934	0.370679262	0.152999215	0.748685641	-0.207745504	-0.48629388	0.175214808	-0.149466716	-0.62990176	-0.015032506
0.884667044	28.83108413	4.328497216	2.377988496	2.935111129	-1.466779711	-2.439277634	2.013826261	-0.457481421	-0.762130496	-1.218265671	-0.343275342	2.167640482	1.099485862	-2.381308108	-1.021840346	0.625003139	0.590800508	-0.154593088	0.162197541	-0.118670719	-0.150735162	-0.83001463	-0.36362542	-0.920239612	0.420706955	-0.823313202	0.037649138	0.13646653	0.147789001	-0.26266567	1.236335954	-0.283134221	0.017335552	0.255334284	-0.039524305	-0.04965759	-0.041190649	-0.400134222	-0.29572576
-3.859308323	32.57536547	-0.216325262	10.43692874	3.57257693	-1.01500092	0.723939322	0.277254203	-4.881508302	-2.270244755	2.981374825	-0.301758075	0.928112971	1.399989616	-2.155386161	-1.028880361	1.346391497	-0.580622344	-0.121837955	-0.863325478	0.527109175	0.674346715	0.586185395	-0.679976393	1.496188135	-0.169225067	1.356160459	-0.817274505	-0.282373075	0.283378615	0.328860876	-0.114823956	-0.485343312	0.076522212	0.294665914	-0.499102753	-0.125093663	0.572884884	0.043600209	0.053951606
1.440094355	15.3703361	-2.297011245	0.405909896	2.083409884	-0.430585897	3.045655584	-0.682928697	1.130587716	-1.865817811	0.961611783	-0.896903635	-1.59170948	-1.952416479	-0.888099502	-1.575764799	2.449922222	-0.227664743	-0.035187683	-0.393502225	0.041036299	-1.338785122	-0.168181307	-0.225275723	0.809765842	-1.018233417	-0.919364172	-0.151487369	0.673729698	-0.410720793	-0.289645564	0.058108668	0.277831921	-0.439863424	0.474226582	-0.602108589	0.392339098	0.051980029	-0.610607655	0.15555697
23.49884278	1.331448631	0.626939115	3.063757228	0.351012607	5.195254475	0.839113355	-1.253048273	-2.177521519	-0.668741939	-0.695811464	0.22461398	-1.54299489	-0.528197609	0.118163108	0.754780328	0.814815887	0.544010239	-0.78327337	-0.19055718	1.235558928	-0.768131125	-0.524742779	0.321744109	0.543187442	-0.729004408	-0.27378511	0.53383593	-0.179737357	-0.229114195	0.484815206	0.281561928	0.119333759	-0.573795086	0.006260355	0.541318773	0.65523118	-0.064094615	0.007640481	0.014168437
2.907024192	22.9057916	3.854070168	6.182863508	-0.656818639	0.658285967	-5.67903701	-1.943094696	-0.302715515	-0.250811011	1.749439471	1.637524811	-0.534310814	-0.101007549	-0.919241311	1.005261234	-0.092038261	-1.288602849	-0.202710385	0.676659962	-0.920355393	0.671233134	1.44153256	-1.047769586	-0.186004274	0.701299518	-0.780032301	-0.123970523	0.449062049	-0.363444736	-0.297248187	-0.650160739	0.499058928	0.526043954	-0.48143808	-0.599351808	-0.809253687	-0.181754216	-0.257148038	-0.367372526
23.12635487	-9.990445819	0.477494322	2.241257599	1.150745871	1.349707945	0.242554817	0.249900755	-0.406016249	-2.123775036	2.201457337	1.127121886	0.979306231	0.901850437	0.260425375	0.049389515	0.502038341	-0.065428116	-1.610106009	0.642133494	-0.373556159	2.103764201	0.829845084	0.986041571	-0.687088938	0.255703022	-0.347357148	0.276011312	-0.209963675	0.078616985	-0.406804578	0.390729186	0.262925614	0.307019548	0.451833827	-0.246754441	0.332161407	-0.43238294	-0.479557753	0.405542931
2.291426275	4.479846432	0.585123043	0.837073368	3.960856309	-0.752627322	0.98855917	2.480691369	1.761028833	0.783581547	-2.890062375	1.022410428	-1.64744493	-0.522023137	-0.544046778	0.188380483	-1.388378668	0.504434001	0.619759254	-0.979397431	-0.715455256	0.108800761	-0.868325607	-0.192859119	0.481940076	-1.669681911	-0.8637541	0.011687903	-0.841276898	-0.398337362	0.062182633	0.457916343	0.146147312	-0.445886255	0.165824983	-0.270505469	-0.366396957	-0.980518983	-0.026528937	-0.008093432
12.22660791	-7.880001699	0.160163572	-1.363223641	-0.136246312	0.076338395	-0.58088108	3.062455386	1.703679212	0.969511509	-0.546351425	-0.735524286	-0.11090568	-0.558017009	-0.344934449	2.730527238	0.319892901	-0.429260648	1.285141144	0.397644034	0.152356951	-0.628003919	-0.828435496	-0.938622515	-0.18209062	-0.715496101	0.056401609	-0.180804668	-0.240700864	0.051423903	1.159290138	-0.662288242	-0.328798857	0.130369774	0.114058903	-0.195143509	-0.641721419	-0.441338286	0.421279212	0.236399996
3.634472193	18.25938093	3.751369521	-4.270595475	2.808249564	2.450447749	-0.799063964	1.544731004	3.54629245	0.854610407	2.458755069	0.089458443	1.246810164	1.306562798	0.853840088	0.058976584	-0.962544957	-1.092160059	-1.458813426	0.088285209	-0.496015286	-0.93192097	0.872624441	-0.490659875	-0.203798697	0.260176875	0.011322914	0.100207126	-0.613898618	0.89589538	-0.10439029	-0.116611948	0.154473225	-0.136513398	0.341807663	-0.080686216	-0.078505846	-0.76396093	0.17335678	-0.010926271
-3.04768309	20.93945485	-3.839683202	0.314354375	-0.172345644	-2.595617872	-1.754940799	-2.967124815	1.92704492	1.040408107	3.998404369	0.837858167	1.216791634	-0.536160618	0.9537695	1.488080501	1.361596964	0.124134066	0.262860255	0.420342362	-1.147355236	-0.616242832	0.312957999	-0.658334143	-0.257630934	0.038955669	0.188805043	-0.379115144	-0.15140729	-0.649700025	-0.673666263	-0.714657037	0.292116233	0.192265291	-0.161712628	0.650817394	0.341807228	0.28421869	0.067897073	0.197167579
5.935215048	11.56172877	2.969292909	3.418368568	-0.44108176	0.080677063	-1.690413889	2.453663485	-2.065948428	-0.465414611	-3.494762552	0.299361119	-2.438897521	0.328087049	-0.317797955	1.588980764	0.802872378	0.40962339	-1.320284831	0.607792228	0.053805508	1.62828953	0.916463139	-0.558159706	-1.089858416	-0.21878148	-0.28237156	0.28991829	0.446609375	-0.000826888	0.724246944	-0.216835976	0.565734545	0.070684615	-0.588660316	-0.337807139	0.06532753	0.407867287	0.270550329	0.135972977
-8.45390253	-11.99346486	-1.814117248	1.214520973	5.89343575	-6.209406096	3.163095306	0.380376644	0.084269189	-1.073013701	-0.695974978	1.747882249	-1.251564312	-0.157766315	1.059767515	0.470347683	0.374642913	0.954577638	-0.076923728	0.067772122	-0.26798608	-0.208773742	-0.115429893	-0.086496212	0.095407677	-0.418476078	0.310977519	-0.564738545	0.384975753	-0.49789964	-0.242282798	0.015774166	-0.116099104	0.103907649	1.116205073	0.384761616	-0.177948236	0.390324166	0.729925583	-0.207914254
-6.82876757	-0.282885456	-1.523432859	0.698942889	-0.721594169	-1.617067923	-4.356332922	-1.064814319	3.298505381	1.521287485	0.409683348	2.771350446	-1.433712001	-0.361172888	0.830583933	1.319160202	-1.633097681	-0.16819197	1.067355333	0.484844469	0.078878436	0.699129638	1.180709796	0.468084343	0.829755847	0.889449853	1.174368496	0.644520473	-0.010956704	0.176104836	0.856567751	0.328182052	0.345207669	-0.376156574	-0.340961713	-0.059849167	0.176212367	-0.173753253	0.068140648	-0.192239984
11.54340865	-7.752364778	3.150043877	-1.287074212	0.058031483	-3.284178844	-0.921400125	1.261375219	1.945979537	-1.512843886	0.708744639	-0.688437218	-1.307836538	0.864673625	-0.565327156	1.409950915	-0.818749783	0.068161843	-0.532429867	1.102898343	0.416150376	-1.226564061	-0.843122782	1.060977833	0.132960349	-0.062302918	0.285771906	-0.478397692	0.603753864	-0.582491032	0.328238937	0.510017387	-0.588293946	-0.898783505	0.359199549	-0.195035351	0.726980316	0.286973268	0.140028084	-0.207540711
7.191678066	3.227719432	-0.951450739	-3.458801665	0.626881659	0.905587532	1.42640517	0.37161897	0.769734843	-0.019581999	1.559712601	0.537184743	-2.555187518	-0.245500866	0.881751288	-0.03974332	0.297903338	-0.572390878	-0.183106287	0.695940813	-0.210130502	-1.341314316	0.287356594	0.301032806	-0.252924501	0.171364493	0.657121646	-0.408509055	0.849660695	0.807174035	-0.044878985	-0.567065617	-0.241295734	0.293619798	0.205826926	0.277212198	0.068355902	0.385001541	0.091574293	0.400523018
11.14796973	-8.711413912	-4.022073855	-6.857730938	-1.646650738	1.985568872	-1.265222372	3.449105103	0.073199863	2.929319065	2.457966689	-0.174363128	-2.127093799	-0.984645613	0.707823642	-0.768904125	1.494525459	-0.215066591	-0.113851136	1.021854605	0.629924063	-0.371916902	1.054933539	0.817051475	0.279917937	0.455787631	-0.71075138	-0.910793296	-0.195530125	-0.314521133	-0.15011457	0.519571793	1.142616654	-0.482427322	-0.493398538	-0.484485988	-0.322661171	0.051011302	-0.625471435	0.152842649
-3.616924949	45.6006799	-14.86557177	7.707577813	2.812658614	5.980289268	-0.948114803	2.369825523	-0.274394762	-4.133455566	2.729460076	-2.679257136	3.697359259	-1.133195705	-0.126717192	-0.757079851	-0.729640204	0.804336075	-2.268389872	1.373135329	-1.496790848	-0.258204372	2.018027696	0.235943663	0.721605734	0.08817614	0.764325568	-0.89775038	-1.073577822	0.276694909	0.352722915	-0.961649809	-0.328676742	-0.967362091	0.036327382	0.190955779	-0.147116221	0.478752793	-0.060534978	0.103601338
5.820876754	-1.304183935	3.321367214	-0.323848277	0.113887571	3.390063434	3.568266066	2.665768171	-0.383809579	-1.581102784	-1.743945333	1.177220221	0.425581281	-1.298566541	-0.370546462	0.292126643	-0.751722987	-0.367304746	-0.92372038	-1.575424776	-2.013798327	0.061181946	-0.109260524	0.097377021	-0.729336444	-0.589694224	-0.026537247	-0.668262131	0.492722408	0.341583014	0.063466579	0.821932236	0.717894021	0.170348475	0.036632321	0.307392778	-0.075421211	0.125153714	-0.625908452	-0.362337433
-6.570082072	6.060308079	-5.245322102	0.654488551	6.674496588	2.881060959	1.601784469	-2.192422172	-0.689432286	3.232384993	-2.366096164	1.062540123	2.875152026	-0.149628171	1.674759273	-0.580204056	-0.483353102	-0.864709953	2.520645416	-1.298637534	-1.428756872	-0.785618794	-0.280685579	1.388944635	-0.330250029	-0.309918783	0.709513938	0.367646304	0.590661488	0.648194419	-0.646453675	0.002354986	0.414522387	-0.156574578	-0.255486386	-0.406363156	0.038301453	-0.870190858	0.580102888	-0.133011276
1.590968276	11.69260598	-1.205128003	-0.208471707	0.016046673	-0.80358089	-2.236065456	-1.874511144	0.809310692	-0.395002856	0.274355812	2.33736072	1.305121293	0.509124449	1.831832343	0.188259856	-1.280241801	0.197391237	1.71931487	-0.030981376	0.396842547	1.75441437	-0.404881832	-0.188269882	0.434717817	-0.33414654	0.691684947	-0.011394291	0.130536247	-0.036111203	-0.73710572	0.015775341	-0.215137231	-0.553774549	-0.109802666	0.308660614	-0.178490872	0.31934066	0.257396878	-0.200178786
0.223013495	2.703327701	4.953356907	-6.373788303	-1.625171694	-1.696779351	0.186416634	3.293066983	2.254975525	-0.329353463	0.650450167	0.170366708	-0.659095701	0.465330323	1.249908436	1.072323608	2.04814782	0.769244945	-1.207797945	0.650451422	-0.081703282	0.381770172	0.931693973	0.415474304	0.848296209	0.654270955	1.356672699	0.335774967	-0.089670192	-0.680748935	0.376750347	0.614865568	0.318634848	0.185771483	0.048131157	0.579725942	-0.069800038	-0.348149849	-0.666297276	-0.160113599
-2.467704378	1.249247516	9.365559889	-4.680672643	-2.683275053	1.263876361	-1.015586018	2.429278065	2.207175651	1.178809497	-1.076947351	0.04146488	1.410569108	0.90347157	0.716958806	0.317122834	0.13990547	1.877131702	0.504217425	0.34979513	0.837364946	-0.057724173	0.558552415	0.072053883	-0.166094166	-0.971619658	-0.202194051	-0.453048793	-0.194024274	-0.590936759	-0.671546879	-0.27015929	0.37941699	0.146306459	-0.471461193	-0.183169801	0.563283531	-0.090813073	0.251405866	-0.124007832
4.118419513	-5.316669799	6.882280711	-4.759275534	3.059273651	1.54410453	0.019089275	0.108211341	-0.141462417	-0.704598909	-0.440601441	-1.064141276	0.298452415	-2.083728005	0.978098642	-1.527214336	-0.96682345	-0.709940928	0.273288226	-0.767445209	-0.127778921	-1.151882124	-0.214242091	0.167299756	0.071863043	-1.470712025	0.371261112	-0.203327814	-0.549703475	0.305094905	0.528710174	0.241277974	0.013348641	-0.049464502	-0.353199325	0.29524592	-0.053977029	-0.137962398	0.070585368	0.295206739
-1.672488641	13.04982215	5.9073061	1.490350504	5.178748888	-4.351031332	-5.417362391	-1.189311206	3.491620436	-1.483928365	-2.473347075	1.522774073	0.307711389	0.056498866	-2.100940093	1.466289767	-1.552520424	0.940094399	0.910210975	-1.313152697	0.124980173	0.701065648	-1.548585288	1.524451356	-0.543569044	1.835998339	-0.291685714	0.239678445	-0.089650064	0.117690446	0.253779007	-0.061523987	-0.540191566	0.153701402	-0.302480743	-0.312882711	0.24467525	0.114819463	0.293926097	0.132835002
0.470275574	2.268777701	-0.061434936	-3.933205166	-0.911091062	0.396456227	0.592989462	-1.927296734	-2.402530692	-0.718071649	0.496870212	2.478711631	-0.703800635	-0.451241798	0.547568349	-1.526652512	-1.285928361	0.095161094	-0.482729686	0.154341132	-0.353778854	-0.086415262	1.227660774	-0.305765465	-0.57239453	0.36093668	-1.192595595	-0.523976082	0.260760328	0.400830036	0.682269318	0.721539544	0.501103151	0.176634578	-0.491705987	-0.288950541	0.064286641	-0.471865236	0.397671621	0.355356894
1.028272093	23.98550064	6.191669536	4.994119865	1.239471276	4.423916487	-0.736909079	1.981009055	-1.255215812	2.284950883	2.089834099	0.824393355	-0.732669499	1.896366312	1.341039928	0.658971051	-1.371905599	-0.045515917	0.800641011	0.737491244	-2.418757851	0.984602727	1.803144693	0.185335182	0.408858783	0.970888757	0.143470778	0.349428497	0.851985431	0.166878296	-0.433310976	0.074297538	-0.242337658	0.150727045	-0.18980426	-0.163591668	-0.29563962	0.019677779	-0.036978662	-0.356284494
1.212365619	30.02313219	0.439881376	7.411402059	1.970341326	-1.908810375	0.346086658	0.595124137	-1.974224593	-0.366955206	1.552066854	0.960055148	1.0379487	2.325196344	-1.408486662	-1.244989437	1.562041271	0.12850963	1.08321564	-0.784891976	-1.248966937	-1.300921391	0.78454209	0.596783454	0.160966456	-0.75125944	0.330764126	0.012160432	1.233464469	-0.366554524	0.06726681	0.40683839	-0.076260845	0.626371938	-0.31750564	-0.328623768	0.395977897	0.208346917	-0.039609848	-0.633072229
-0.712007129	12.8214716	4.210393548	0.576570366	1.17543826	-4.08664682	-0.876716107	-0.129273649	2.255443593	-0.512556014	-0.825947864	0.410410452	1.161756203	2.011421438	-0.316119596	0.576932623	1.107357844	-0.000426797	1.159545327	-0.350896599	0.800669908	1.300071011	-0.370000995	-0.171895395	-0.362807731	-0.907568215	-0.635247306	-0.122473859	-0.878273444	0.400813716	0.111169746	0.107738226	0.614084568	0.451144148	-0.314560184	-0.661587166	0.268867505	-0.216237395	-0.014279015	0.413129701
-7.602699434	12.59417286	-2.684275625	0.51610321	3.979046487	0.711013184	-0.442194662	0.104625091	-1.090857821	0.836340501	2.325489568	1.331597123	-0.536989459	0.686374002	-1.040930769	-0.83859577	0.299488738	-1.861695478	2.931025277	-1.867034427	-0.978201584	-0.442237518	1.137145676	0.67548549	0.22096417	0.176601403	0.621160498	0.512023289	0.844244858	-0.012219386	0.407280322	-0.167498848	-0.087958916	0.534911791	-0.571595952	-0.166648118	0.611136847	0.485438208	0.429237305	0.506868414
0.55057973	23.426012	3.496701442	1.879642592	8.564671494	3.496827245	0.993684188	1.196677212	-3.713396222	0.903883119	0.843122156	-1.120171513	-0.818132063	0.860887672	0.164896144	-1.953251289	1.822430938	-1.322098046	0.945300617	-1.145128068	-0.489490585	-0.208035809	-0.242840851	-1.4739752	0.659146305	0.889252512	0.836051809	1.011540938	-0.060817672	0.394673402	0.859545221	0.048500867	-0.238226761	0.149621518	0.319216298	0.506782696	0.251646174	-0.259447479	-0.022619255	0.710511466
2.220770012	16.15114239	9.214688376	3.748450525	3.117694545	-0.960582076	-0.740305412	-1.745248852	-5.792719266	1.431050123	2.171243561	1.672435066	-0.824955532	1.980086081	1.553488088	-0.537779102	1.128747072	0.001810796	2.597550206	0.044569231	-0.467171989	0.224718548	0.706433945	-0.612955326	-0.766466914	1.265067128	-0.242877808	0.231954303	1.220708709	-0.675372958	-0.308886207	-0.091628635	0.051732594	-0.048195239	0.286062985	0.194246797	0.106435879	0.112521453	0.031220256	0.340291051
-6.799546131	7.126929571	2.673543837	7.617579067	0.798683856	1.335359257	-1.494895437	1.308816672	2.856489821	3.219815836	0.426812339	1.635761388	1.231347281	-1.778246512	-0.332527656	-2.098326012	1.20852588	1.87360192	0.087561098	-0.967236726	0.067878286	0.325546003	0.345284399	-0.273570404	-0.084008899	-0.459126789	0.309917262	0.705006545	0.679301558	0.124318668	0.242943532	-0.454867612	1.285927847	0.372687797	-0.355787813	-1.188167059	0.31467297	-0.441820437	0.101933536	0.009317344
-5.574478499	19.85984096	1.0373764	3.322381957	6.230685028	-2.035383249	1.823494461	0.373118625	-2.83559208	0.751593684	0.680986683	0.473322254	0.223234145	1.229286459	0.622890182	1.483786794	1.121536403	-0.087097015	0.488851178	-1.837833741	-0.35935846	0.968875479	-1.335500067	0.208043864	-0.030726425	-0.181723312	0.362432654	0.374254807	0.594157192	0.288069822	0.077544613	0.58993533	0.576546934	0.599400913	0.033611847	0.096155596	0.416193877	0.548275969	0.278630045	0.010786713
0.108388846	26.15627855	4.50009695	3.14661161	10.7107967	-1.438344572	-0.816884455	-0.447544971	-5.071475145	0.664189303	1.521934066	-0.156507611	-2.081078706	4.066150555	-2.27397103	1.127993428	1.169145043	-1.695085921	1.459972731	-1.618650792	0.208428954	-0.063057114	1.192783452	0.944167242	-0.349550596	2.783168293	-1.216490498	-0.423917732	-0.407637855	-0.687802848	0.231149861	-0.525470598	-1.331897934	-0.344613823	-0.43473165	0.600382685	0.579941656	0.036469051	-0.392472908	0.350364905
0.372201519	7.257188461	-2.869677411	5.630133383	-2.779919526	-5.435050305	-0.633961374	4.986327353	0.02953367	3.225054784	1.628997835	1.453177825	0.37848952	-1.132257798	0.56466867	-0.708306468	2.22097739	-2.6442915	-0.240366858	0.055484674	-0.916671781	1.764704932	-0.212050633	-0.627106971	0.588529113	1.740138369	-0.190198114	0.207671195	0.231098995	-0.717963199	1.490531027	-0.054404592	0.404567564	-0.130776185	-0.097047352	-0.186542205	0.56907315	0.814705327	0.011434043	-0.176060218
0.053405131	32.94793141	-5.2790899	3.65303488	7.031018052	-1.682332758	-0.579740999	0.923009581	-2.089151325	0.260981311	2.888741516	-0.85888456	-1.30682588	1.937813672	0.036120128	0.517487873	-2.022999914	0.48508437	1.214408509	-0.486241121	-0.205342201	0.623881177	0.592009948	0.745686507	1.176563232	1.951521079	-0.065705915	-0.046375005	-0.251772038	0.328595541	0.209808004	0.882706454	0.105605366	-0.033330975	-0.403549819	-0.085970927	0.17438895	0.285835133	-0.223882565	0.141634524
-6.399943211	17.70027879	2.609117097	1.559362137	2.28027021	1.473199595	-0.590568389	3.576854821	1.468542422	1.457296779	0.946369864	0.081649548	-0.051593293	0.119172093	-0.3256857	-0.544965105	2.449801675	0.219037237	-0.724881308	-2.693223442	-1.247418257	1.084393462	0.27237131	-1.028745307	1.127426479	-0.557731517	0.942535039	0.365139104	0.561076749	0.531686176	0.404814396	0.44391773	-0.349016064	0.692435488	-0.894585816	-0.226165815	0.586719766	0.460265897	0.132972779	0.187775199
10.44554065	-22.86427511	1.732281041	1.991770436	2.583660816	3.735030071	1.289929239	-0.084707523	3.335290181	2.176254458	2.246535476	-1.311398269	2.06316554	3.021655399	-2.789108691	1.715022125	-2.58045875	0.697962764	-0.252418571	0.16103795	-0.006957075	1.293724568	0.234992905	-0.487208498	-0.75919154	0.217799461	0.222663273	-0.112258875	-0.289939302	-0.296353477	-0.317935376	-0.371243741	-0.070489078	0.557367775	-0.520119642	-0.127797872	0.189358896	0.473293561	0.524630743	-0.343915515
3.167906378	-17.73401974	4.70911641	-0.648194496	3.907428578	2.709720748	-2.426889315	1.633145051	-1.486607731	-1.178856261	1.438683609	-1.943513565	0.537337033	1.611077871	2.316183164	-0.607912396	0.44364665	0.688498674	0.282961215	-0.054745824	0.031597077	-0.411770832	-0.126542378	-0.090709964	0.206044568	-0.504717546	1.781827903	-0.83801782	0.687663501	0.417029537	-0.08078104	-1.068021533	-0.206087903	0.323530671	-0.095782916	0.61783132	0.243137841	0.465095305	-0.284683551	0.178569144
16.11934128	-11.79127525	2.041343324	-4.374473606	-0.071596325	1.638721399	0.79428577	-1.508269224	-1.044079595	-1.04091941	1.337565512	-0.934596147	1.362331484	0.644483092	-1.477761491	0.348930488	0.82133067	0.879221168	-0.780629751	1.262979192	1.026886856	0.640764896	-2.492519737	0.173976673	0.108901274	-0.231599385	-0.387130668	-0.157928075	0.544612835	0.949095295	-0.235799483	-0.559354457	-0.534229542	0.277591952	-0.461619325	0.093806456	-0.210929268	0.295017688	0.338184918	0.392562198
17.99378156	-8.886962362	1.402463371	-1.391003369	-2.94512035	-1.42955699	2.639011433	-1.076707341	0.937210462	-0.744839466	1.62367333	-0.761037673	1.149215794	0.241191108	-0.069065618	-1.11320811	-0.227027507	0.272819134	-1.104968365	0.229534836	0.72990603	1.222072576	-2.032548754	0.457462312	-0.199081891	-0.400230883	-0.914223989	-0.884394239	0.45323022	0.294444696	-0.543488579	-0.276383742	-0.17054223	0.354576978	-0.483001497	0.491860961	-0.027087705	0.465975105	0.426114542	0.351618439
1.021300253	-9.08827689	-0.423233137	-1.54351607	-1.059177477	-2.72853859	4.801707748	1.866102083	0.354865317	0.047025261	0.789536237	0.230794653	2.119108609	1.670442532	0.54807501	-0.40474063	0.577150412	-0.998206077	0.770847245	0.2071977	0.389764064	0.827497095	0.335487602	-0.628501336	-1.1249267	-0.296943375	0.196925224	-0.249039957	0.104349349	0.306875306	0.197961655	-0.200535828	0.416171698	0.352523572	0.103841905	-0.06713047	0.014324364	0.174808261	0.148156475	0.431895391
-10.29351897	33.75120393	-17.98324781	10.79647931	-4.499513459	7.456730637	3.08385006	5.142185841	4.62667259	-0.86294483	5.293959622	-0.577215208	0.280740676	-1.159426214	-0.435574193	-0.152271575	-1.759873829	2.131965938	-2.119376534	2.981342976	0.621144561	-1.059635059	2.064932127	-0.533927659	-0.168165152	-1.609702673	0.950611429	-0.654892654	1.633805281	-0.434152087	0.271045946	-0.355426575	-0.512790815	0.391221549	0.435935854	0.100646113	0.045367687	0.235882526	-0.054116186	0.653108322
6.436719094	-18.70546683	-3.948753385	8.982500361	3.60373152	0.552476881	0.53681742	-1.164254914	3.321963432	0.886233453	-1.078141535	-1.786434519	0.626085886	0.170699843	2.251321538	0.053309648	-0.964691065	-0.288609768	0.29514805	-0.512353333	1.12110721	-0.402412113	0.541363471	0.260617994	-0.237144432	0.000723637	0.283230408	-0.022106671	0.731752959	-0.565950154	0.993339431	-0.248957247	0.445762199	-0.292482698	0.037024224	-0.413272916	-0.493921178	0.259417468	-0.038571289	-0.303333584
-0.687930312	14.73785491	11.02855696	4.718242301	-2.487161135	-0.214138075	1.898243097	0.707875168	-1.686821165	2.241693421	1.121267542	-0.551118923	-1.161293172	-0.093221234	-0.898418259	1.49922681	0.19284763	-1.300425733	0.985380229	1.731465309	-0.335550098	0.272720111	0.01520035	-0.261065571	0.823831045	0.480468621	0.49628774	-0.570973254	0.175952133	-0.484231685	0.571215792	0.137373146	0.181886204	-0.25009039	-0.10647319	-0.191175386	0.156190929	0.280935475	-0.311016547	-0.420394911
9.066656455	13.27813489	-7.255000914	5.606107054	-5.568962693	2.398192309	-5.029032481	1.248599508	-3.095112555	0.522065067	1.051556654	1.739838656	2.467586877	-1.279687421	0.332602382	0.957645278	2.538221841	-0.553756236	1.709665738	-1.003044865	1.210222488	0.63009225	1.018792152	0.73544982	2.201865193	0.298815762	-0.2587858	-1.862242034	0.011326017	0.802941075	0.42305099	-1.122611157	0.70788112	-0.331361473	-0.07808847	-0.321119692	-0.313356165	-0.515029714	-0.098538132	-0.082853077
-3.074791328	-1.714796875	1.257219141	-3.7049494	0.440753144	2.742364484	1.07495905	-1.000729435	0.648390967	1.604224146	-1.393090837	-0.293073298	0.700514372	-1.953722574	0.286797778	-0.970445167	-1.860715239	-0.099075878	-0.005221666	0.577569532	0.594554234	0.309801026	0.647220977	1.119733045	0.919993393	-0.103136814	-0.846243155	-0.348967147	0.580357102	-0.418871503	0.049011761	0.181247399	0.298831209	0.605314556	0.113290119	-0.035137581	-0.338701264	0.198575942	-0.312109698	0.150064453
20.70312061	-13.17410702	4.451405165	-1.978037081	-1.686457862	-1.832026838	5.274377874	0.763024804	0.145765511	0.821981999	1.24208283	-1.444113085	0.501793158	-2.548387881	-3.443236052	2.567258404	-1.980151703	0.513885836	0.014444503	-0.944759198	-1.169709978	0.1087921	0.878864415	-0.349332237	1.387823677	0.113555562	0.068758529	0.4033092	-0.180164706	0.140506213	0.563741917	-0.148577158	-1.009829573	0.028998009	1.014069381	0.000575319	0.462878134	-0.275248591	0.218516941	-0.699734447
14.47844459	-4.863587775	-9.927947235	3.901084464	-5.023992025	-7.218732156	1.793730268	0.613236251	0.811117271	2.300130938	-1.922714655	1.00782885	1.941174545	-2.66720812	-0.11557132	1.416353213	-0.715975976	-0.329889586	-0.135457585	1.427964719	-0.863177276	0.742081588	-1.177062106	-0.022530336	0.683569906	-0.351998115	0.743708129	0.179001386	-0.268285688	-0.27071422	-0.14808641	0.154025057	-1.129063694	-0.072273624	0.576964775	-0.355927988	0.316998288	-0.222815191	-0.381247744	0.372812982
5.295019233	0.282478842	-3.004545249	5.248505216	1.612719789	-1.03303953	0.343587743	1.104787486	1.595005721	0.048160995	-3.267478945	-0.860842095	2.372579259	1.143578662	1.354335858	0.2146336	1.016210205	-0.948810901	-0.582373169	0.312174264	0.076605997	0.428293724	0.510788933	-0.357581204	-0.558367677	0.65799751	1.000484833	-0.165160173	-0.525831749	-0.067890525	0.568359131	-0.388259982	-0.288711718	0.068999147	-0.521734169	-0.204929451	-0.267089481	0.29070327	-0.054705337	-0.111303366
30.13427902	-11.88974583	-6.266330883	5.505669638	-7.156623615	-1.949430014	-0.947910431	2.760783092	-2.48889708	0.317164066	-0.898201672	-1.274283656	1.739242296	-2.071602733	-0.057916395	1.344312278	-2.809241362	-1.134456011	0.396728672	1.655766005	0.951586423	0.906230389	-0.057971339	-0.473179992	0.229317933	0.502391706	0.924308648	0.39111032	-0.581460418	-0.917873056	0.351724001	0.643817374	-0.92282055	-0.531800108	0.13159811	0.01502856	0.294262611	0.767388511	-0.632307421	-0.079042755
3.403006266	-8.959791048	7.887585426	-1.448815383	0.670427484	-4.561693573	0.709166906	-0.495273936	2.489968215	-0.011950153	-0.308863893	-0.914720389	1.578072232	0.065365938	0.041393395	0.488119134	-0.015329623	1.291908553	0.656245566	2.445620857	0.565068524	0.515922674	1.034791462	-1.111208515	0.130556125	0.016469082	-0.47134704	0.127008407	-0.002421768	0.221145579	0.564712173	0.255317882	-0.392043759	-0.598172327	-0.175958245	-0.070641971	0.310956155	-0.04703653	0.057152189	-0.118116254
19.51768558	-1.817572528	0.88965834	-3.103556627	-3.129501825	-0.719206396	1.417058161	-3.082306145	-2.006698235	1.642523018	0.880590413	0.309195451	1.145157201	-0.314991727	0.59343839	1.637118956	-1.080082365	-1.088055232	0.246338789	0.448337137	0.618046136	-0.349077359	0.163895866	-0.583552006	0.536126805	-0.131458259	-1.060404989	0.529738869	-0.527652568	-0.275072494	-0.104150423	0.290621405	0.331071627	0.431663431	0.869548285	0.260508158	0.047352086	0.476980768	0.045579771	-0.02781448
15.26602648	-11.5927713	-10.32670719	2.86260395	-0.638152318	-0.206623274	-1.771536466	2.672838451	-0.467816399	-0.706036987	-2.893506415	0.815569956	0.947675249	-3.690211091	-0.219540992	0.938887972	0.447784006	0.558588576	-0.417143433	-0.165754784	0.432010448	0.980000779	0.42117704	0.328550524	1.360361086	-0.498766297	0.063409386	0.288188969	0.09391033	-0.623391886	-0.000984983	-0.60128669	-0.467179053	0.091697693	-0.121427408	0.995385816	0.110587162	-0.120827844	0.170449914	0.536823484
2.0185911	19.26876981	-7.181735228	7.239023452	-3.090150257	8.722072946	-2.055055682	2.581950598	-0.244009707	-0.225649143	-0.831239958	1.709453369	2.596392053	2.530281284	-4.072344253	-1.159569921	3.337201814	-1.643205038	2.410398805	1.895740092	0.180270562	-0.588298772	0.940802895	-1.897443284	1.35995343	0.173620392	-0.776700816	-1.959525208	0.264841895	-0.134726018	1.027353039	0.316618883	0.139883658	0.577821896	-0.052684425	-0.106145339	0.105097746	1.438705184	-0.654032866	-0.507176492
20.49324623	11.59503715	1.016971858	-0.008939124	-2.479548448	0.267056159	1.415049241	-0.990870046	-2.209931122	2.603553181	-0.201589708	-1.078163339	-1.364594156	-0.788688101	0.608705615	0.834403149	1.651842019	-0.481636626	-1.161418255	0.114851607	0.378575087	-0.363209763	0.329256547	-0.045888446	-0.654611389	0.126271139	0.5741409	-0.336744975	-1.159919071	0.83155178	-0.281662798	0.259514188	0.387326245	0.061793241	0.033790613	0.472001262	-0.445314568	0.557773921	-0.219936974	-0.196312222
-6.150830989	0.776281136	5.917699085	8.740944803	-3.449096486	-0.840909197	1.935344756	-3.278625712	1.264772884	1.701758339	2.07038032	-0.457744568	-0.087650268	0.418250502	1.246369671	-0.281467835	-0.443498615	0.088151231	1.072090988	0.1980068	0.632010275	1.25416472	0.494041217	-0.341904559	0.154775319	-0.212839003	-1.439575209	0.930933369	0.656856843	-0.149618363	-0.894956646	0.117526286	0.401542956	0.100232679	0.091049558	-0.024882406	0.454445343	0.387023347	0.184835336	0.330788451
6.025276506	10.75142297	3.599194736	0.604504768	2.568715731	0.52039572	-6.154416803	0.59453933	3.204007852	1.422581624	0.835365282	0.727280839	-1.677329877	-0.205274961	-0.607785128	-1.255906417	1.000218274	-0.630863675	2.224893914	0.95784319	-1.034521691	0.253291757	1.463998515	-0.024008967	-0.945636672	0.411887494	0.818619045	-0.052352388	0.025052701	0.706026728	-1.192830562	-0.101189575	-0.452530368	0.422659375	0.356862876	0.228555601	-0.205279544	0.180630745	0.282119342	-0.451940087
10.19765602	-7.658939877	-0.704049383	-7.451680469	0.24192676	-0.054164139	-2.054771597	0.353716463	-0.267423871	0.028536423	0.317814039	1.188348299	0.945709705	0.134516769	-2.508759916	-0.103311405	-1.17746301	-1.462607352	-0.200684891	0.792609619	-0.377687522	0.743442402	-0.722483909	0.217694653	-0.694310823	0.557647106	0.613903309	0.428358551	1.083675386	0.040975234	-0.535467653	-0.479702994	0.043773084	-0.337370213	-0.242921439	-0.303232351	-0.233270438	0.719407276	-0.130932473	-0.235762702
4.723666268	-20.05534972	-1.841599487	0.433020778	1.559537084	-4.185952698	1.281355346	1.738525695	-0.825735789	0.451257209	1.024776735	0.114766428	1.494727319	1.623729337	-0.725878156	1.014944869	-0.128876754	-0.970477781	-0.160165141	0.698771022	-1.214011876	-0.276128231	0.346373442	-1.385141902	0.204784098	0.738237565	-0.435387752	0.129401776	-0.970013479	-0.2944461	0.515079336	0.526686677	0.942797685	1.023244766	0.075675288	0.149317553	-0.269323055	-0.635615336	0.297350502	0.312430229
27.87126653	0.447125553	-3.492203327	-2.157726112	-2.374922431	1.098464226	-2.335948282	-2.855319761	0.440918811	-0.546591291	1.202158599	-0.025008869	0.623456319	2.140828577	-1.32032413	-1.120938095	0.552802817	-1.551210258	0.970049461	-0.112254484	-0.089901545	-0.696239653	-0.861197394	0.951753919	-0.661899308	-0.140850857	0.918716316	0.414365461	0.453737558	-0.147012608	-0.031471098	0.054139417	0.300617263	-0.141882049	-1.118304446	0.940023866	0.494920817	0.243845385	-0.284912817	-0.1244317
6.356728511	-14.95789853	5.009940347	1.775803145	0.013056714	-1.492723351	1.016677228	-1.723524865	0.111336571	-0.004571628	1.330643706	-1.930929895	1.779682003	0.896694897	0.620397082	-1.529287912	-0.482534444	-0.519762532	-0.214690292	0.36860792	0.524933085	-0.054313133	0.676227255	-0.376618564	0.470697714	0.215533758	1.128976059	1.520826865	-0.034086259	0.727935702	-0.726911055	0.184811604	-0.03521666	0.078111231	-0.794842535	0.28853945	0.735429533	0.547811085	-0.474982814	0.097868413
21.71179881	-5.827676524	-2.264278565	-1.898998008	-0.600826528	-1.638693283	0.403958849	0.896576459	1.716971055	0.272415066	2.631266893	2.58568734	-0.64232563	0.472877436	-0.591948899	0.566975746	0.843741351	-1.646126023	0.215905742	-1.378029753	0.863229534	0.212354032	1.696832571	-0.160737216	-0.661278156	-0.171233809	-0.394607589	0.704624927	-0.418474807	0.340132862	-0.145773659	0.337462622	0.483371499	-0.472461022	0.231783759	0.911545991	0.546189667	0.279410676	-0.638749311	0.286647511
16.01879311	12.43386347	1.779124808	4.462259642	-0.155223806	-2.380577596	-0.350471345	-0.570777857	-1.314707225	-2.54580165	-2.734898648	0.558339167	1.800745118	1.5955063	0.708895139	-2.438114063	-0.205997546	-0.394485817	-1.68975486	-0.848038635	0.432674627	-1.954360708	-2.197853161	0.213923495	-0.229748127	-1.257304797	-1.031438802	-0.265847022	-0.023650033	0.254921543	-0.45432927	-0.239804397	0.470826921	-0.011614137	-0.153677446	-0.230719036	-0.285364142	0.320875879	-0.034295459	-0.577617597
19.55734676	-1.354619674	-1.303004825	-1.398759515	-4.395715719	0.6053518	2.187289138	-0.299194263	-2.327055084	-0.91576106	0.272592743	0.739314271	-0.901039581	0.899563836	-0.120453737	1.978705134	1.60222321	-1.818286975	-0.464783544	-0.696887179	-0.692546454	1.202911328	2.247613385	0.817266657	-0.283486604	-0.583186693	-0.260783743	0.529289925	-0.406208031	-0.249046754	-1.048244802	0.170312499	-1.308925914	0.205632707	0.312484552	0.040693289	-0.125659089	0.166054412	-0.0967587	0.333058225
-2.983761465	10.67802161	8.513127626	-7.693171162	1.203490689	-4.023815789	-1.125667582	0.019981706	2.379575535	1.301546908	1.13130826	-0.352555519	0.396408715	0.924890812	-0.583792052	-0.162460659	0.193474226	-0.337393265	-0.524704613	-0.340305882	1.392303748	0.409414516	-0.378561438	-0.337799519	0.300557804	0.623711611	0.583838813	0.042621621	0.029683444	0.43032362	0.614936975	0.588719919	-0.330547883	0.819093138	0.131852792	0.346806518	-0.35073223	-0.399136536	-0.486173615	-0.190896789
-5.624978229	4.438599682	8.61645677	-8.969601124	2.740420798	-2.95274864	-0.06895991	0.170038786	1.761858191	2.586089082	2.296711498	-0.042017031	0.027903609	2.16652497	-0.289408129	-0.533077874	0.657933481	0.065262849	0.863029393	-0.993341898	-0.536497338	-0.330554937	1.008235855	0.360626311	0.374959441	0.592716742	0.506384411	0.00491696	-1.104959912	-0.311115345	-0.158336988	-0.29329024	-0.392818281	0.715204362	0.398058608	0.403192313	-0.112731574	-0.100031637	-0.274171597	0.188844924
11.64780649	15.62024544	-6.076966947	5.475793608	-3.542955513	-1.054887817	-0.835133738	1.996677292	-0.074541957	-1.087180108	-3.62994504	0.857263364	1.528206912	-1.146627968	-1.30064924	-0.005614984	2.638020506	0.756158495	-0.536291181	0.043484886	0.402940143	-1.50481181	-0.925227953	0.304174024	-0.454266017	-0.105604715	1.639607323	1.241842888	-0.805184289	0.082703244	1.050190673	-0.847808632	0.003129329	0.078423477	0.382679693	-0.241779209	-0.543771835	0.304530465	-0.422896464	0.082833974
-0.125988204	-0.477059984	2.58296092	-4.945650782	-3.573239954	1.211022106	-0.674670219	3.341849372	0.827170775	0.855676579	-1.66267742	0.143704329	1.386569117	0.019523053	1.153492097	1.067781123	2.207072761	1.468897089	-0.256998094	-0.55790299	-1.46407375	-0.3562204	-0.2665423	1.271741705	-0.537848524	1.123437388	-0.43483217	-0.875689026	0.684144654	0.288773093	0.222705423	0.323843692	-0.106049985	-0.189221299	-0.167996519	-0.399622069	0.132974676	0.755708131	0.355471615	0.122298144
12.4550034	-6.701987472	4.49891825	-2.856352187	2.263841087	-0.910627326	-3.836711055	-0.975662108	0.755125434	0.155967068	0.055558171	1.158348013	0.51103571	0.666579342	-0.569226825	-0.091005201	-2.306329784	0.271196287	-0.06836689	1.013346939	0.620292977	-0.040603856	-1.379570055	0.967143952	1.027004787	-0.122245034	-0.039576881	-0.767973947	0.668297782	-0.596134401	0.548542214	-0.056618916	0.10575355	-0.254819398	0.374451843	-0.773304457	0.271812705	0.560660348	0.074005178	0.093172772
13.78844194	6.95167559	0.033314582	2.918349022	2.949398489	2.105495142	-2.236842838	-1.91213911	-0.176765584	-5.290908413	-3.898233328	-0.053819139	1.605778232	-0.471107875	0.970565161	-0.657647354	0.884278459	-0.66452152	1.273264562	-0.02881278	0.472097212	-0.159038159	-0.340774871	0.445303637	0.598532451	-0.694695979	0.738353565	0.589253838	-0.079032112	-0.929842997	1.047391817	0.041855161	-0.412238405	-0.332661143	0.016850437	0.534978	-0.462155306	0.299626658	-0.118808278	-0.250881817
-4.446064154	-10.14393824	-10.05681134	7.072781159	6.185805309	-2.558116093	-2.494927772	4.240876519	3.467129315	1.524794138	-1.668843594	0.743409835	3.51694155	1.270140386	1.978721041	-2.597047037	-0.81282928	0.933872592	-0.529367226	0.195282147	-1.15678234	1.552708712	0.337770017	-1.262169974	0.380103617	1.188746063	0.224065675	0.284209575	0.194059221	-0.047838887	-0.024262375	-0.659888004	-0.15904245	0.370192476	0.458532914	0.267654664	0.1397017	0.246968017	-0.187272539	0.438752801
8.034329548	8.082844985	-5.707063473	4.48104042	1.413631363	-4.489603822	-0.442998035	0.316042968	-0.386631075	-1.036578523	-2.438817692	0.615244555	0.350785365	-1.238359157	0.066970556	0.902211326	-0.681190613	-1.205150139	0.242556	-0.79876565	-0.576821353	-1.159687866	0.807979429	-0.211194086	-0.692246202	-0.484718484	0.542558499	0.449643036	0.515706912	-0.530159798	1.040835589	-0.02650783	-0.18145663	-0.217616545	0.082590237	-0.277932323	-0.174063907	0.513496823	-0.097562086	0.08928757
9.164018786	3.912596043	3.924161156	0.810909496	-1.942675968	1.860994148	0.050541224	2.802678839	-0.618472759	0.440900551	1.904413321	1.456522639	1.195101382	-4.305264159	-0.629159007	0.281473156	0.649034967	1.12391262	-0.587193603	-0.684790325	1.522801874	-1.519205953	0.470120611	0.226293552	1.152379756	0.38654632	0.051270032	-0.797261333	1.212816611	0.444725437	-0.762577597	-0.217933286	0.619733783	-0.390193052	0.014194683	-0.278859829	1.200438092	0.052277526	-0.307115301	0.11792025
0.816480227	9.271308725	-1.22515637	5.648857232	3.812371904	-1.803697291	0.634127692	2.53941614	1.348339107	0.06851506	-1.122511263	2.154024216	0.220916244	-0.187488975	0.808808978	1.823930476	1.013764268	-1.340144772	-0.893797382	-0.765366977	-0.354968192	1.443417376	0.58188848	0.079023973	-1.010586618	-0.947158702	1.228154452	-0.568464768	0.389659203	0.562748571	0.816617497	0.240161379	-0.408683439	0.088710423	0.35854822	0.086179603	-0.244800931	0.736886587	0.378737709	0.25315108
0.413891192	-0.028477166	-0.68694516	4.320050115	6.64209487	-0.783158926	0.349667063	2.357224584	2.578701961	1.474386143	-0.884113105	3.609730853	-0.782492135	-0.670418221	0.970081736	0.589943365	0.095749953	-0.660477531	-0.32577923	-0.279610235	0.207673696	0.598731657	0.758660842	-0.234149832	0.069923697	0.112576249	1.150010965	-0.414844057	0.448243667	0.02887706	0.268471586	0.053040821	-0.758779567	0.018604552	0.286436802	0.228052241	-0.440064529	0.202061433	-0.26213109	-0.786053162
20.10528258	16.3440358	-7.056298364	5.497717202	0.146854213	-1.132817774	-4.448442967	-0.268298485	0.522319345	0.340401855	-5.451097149	-0.26070799	-1.025712878	-1.574780702	0.490201096	1.207756009	-0.975508287	-0.913674298	-0.530060923	-0.026831694	0.240679194	-0.124581602	0.199765661	1.440560377	-0.52890959	0.138472861	1.458029943	1.370755785	-0.851463262	-0.028119626	0.296202586	-0.319384887	0.225112536	-0.446171484	-0.833563772	0.43179363	-0.407952512	-0.049942664	0.661541591	0.322973942
-5.171272899	-1.979465783	7.230158732	3.621870388	4.686318558	-2.465203965	0.022539445	1.867828688	-1.562657445	1.925201727	0.357783696	0.034014712	1.033525443	1.649699377	0.869260205	-0.422793959	0.839743864	0.813969589	-0.017500923	-0.639251683	0.024095507	0.087833842	0.003823803	-0.364601348	0.74219269	-1.530695644	-0.862714718	-0.182913809	0.008722271	-0.361556623	-0.646754919	-0.10742625	0.58292903	-0.137940551	-0.692438299	-0.287817587	0.872272731	0.160617075	0.095073229	0.228446844
1.525884063	6.104808553	-1.17980048	2.126786951	-3.412983633	-3.619074512	0.636805322	0.188454185	-0.806144008	-0.633844408	-1.010120037	0.37975989	1.418624015	0.447246009	1.277536717	-1.117272459	1.103311879	-0.330661379	-0.192522515	1.048790527	0.768558174	-0.089495016	-0.078219009	0.264115201	1.070310219	0.822564872	0.469227728	-0.81155923	0.538360146	-1.179806926	-0.212407812	0.393462911	-0.142929359	0.455934407	-0.382692622	-0.636196129	0.342954085	0.372902959	0.241959792	0.198915858
26.87477098	-14.58298485	-2.177772582	-8.248111401	2.725842393	1.599275701	-4.370178654	-5.041061373	0.213788254	0.644904279	7.017567539	-1.469210169	-0.271173598	5.376903222	-1.55933124	-1.78984853	2.065213511	2.053762026	-0.561306265	2.006802692	-0.723301197	2.74193012	-3.244857853	0.841727995	0.034167652	-0.911870265	0.811121216	-0.903955817	0.726294358	-1.072574165	0.564496144	0.42209434	0.868541399	0.489000445	1.253250501	-0.491636362	1.114657151	-0.775718182	-0.099685493	0.775400212
28.77480187	-4.316284892	-4.216858839	-3.683729276	-0.941370576	0.730118155	-0.165847402	-2.445587785	-0.848174332	-1.095938704	0.034222888	0.089426175	-0.398554612	-0.010829485	0.559697871	-0.479469707	0.958992491	-0.260782616	-0.128316173	1.171665975	-0.832945587	0.927037854	-0.572998169	1.971712254	0.062097641	-0.819319271	0.317970132	0.20439531	-0.601499137	-0.574989853	0.494159223	1.302750958	-0.08574225	-0.1006268	-0.094872033	0.749552219	-0.187685039	0.746388818	-0.557288771	-0.13513463
-3.472291665	-20.28926268	8.040849047	2.306785595	-0.875841163	-0.755699433	0.930199705	-4.641875662	-2.088143185	0.145384127	2.525035575	-1.045671189	2.121020958	0.316569654	0.421590199	1.006177578	-0.867226074	0.379129865	0.698683364	1.89623839	0.558091554	0.065300508	-1.279015103	-0.053733246	0.619292872	-0.073895611	-0.452204513	0.669650198	-0.92519989	0.536911559	0.411020692	-0.070730038	0.094540937	-0.128883173	0.767989678	-0.258832522	0.342240293	0.228535737	0.257713134	0.080410534
4.592170613	-1.710011319	-4.281530998	-4.529313517	0.817995434	0.052941609	-1.372791243	1.643105113	-1.000923788	1.706572876	-3.374118609	-0.534833043	-1.717635156	0.898807805	-1.298776983	4.760543333	-0.248769587	0.867970633	0.67114674	0.505930289	0.202564624	0.190810716	-0.241752202	0.322731627	0.550697907	0.552536632	-1.647242666	-0.867456112	0.516007117	0.421008146	-0.260440187	-0.07372902	0.357190255	0.18923349	0.353427689	-0.418077473	-0.188872036	-0.46537692	-1.009486237	-0.79301095
3.409719778	-26.13240973	1.281489139	9.346159525	1.505000271	4.627450176	-4.186842475	6.940959525	0.795630047	-0.888528133	5.028417344	-1.016996653	2.830114162	-1.877835597	-2.689804652	-1.651645144	-0.406122558	0.02262367	1.528218049	0.615601903	0.633902105	-1.241549413	-1.257024477	1.09396386	0.892044225	-0.201958068	-0.275893924	-2.644034733	0.205766927	0.283229996	0.84296712	-0.614208516	-0.037241012	-0.173119785	0.226249022	-0.469753447	0.224493639	-0.409597826	-0.215847898	0.140920216
20.79857677	4.941992786	2.160841688	2.492335664	-2.488656393	-1.037197111	-2.682453427	-3.229059526	-0.847718988	0.443539008	-1.344676586	0.956714582	0.109713069	-0.073825367	-0.810097112	-0.257323692	-0.197356737	0.809195149	-1.94287092	-0.390272247	1.198199851	0.651166913	0.09787691	0.856502961	-0.857821412	-0.93296142	-1.37735767	1.244270876	0.048260887	-0.003102779	0.568534031	0.527592829	-0.088266365	-0.221125848	-0.050362031	0.198143656	0.664665463	0.12019284	-0.4703945	0.390439425
1.561103214	-0.981798524	-2.770616766	2.772515204	-0.207605753	-1.757745496	2.923278224	0.423827394	-0.084016305	-0.312206647	-0.563468814	1.285508998	1.2056763	-0.278572133	-0.155034084	0.047002697	0.133775484	0.822213218	0.023625743	-0.660474814	-0.095235952	-0.432820044	0.007233736	-1.570586936	-1.067158319	0.072851235	-0.593046776	0.416421649	1.046174422	-0.463323752	-0.322779195	0.338848361	0.287389962	0.004585044	-0.860163358	0.12771829	-0.072517764	-0.34024451	-0.100674357	0.713220298
-0.092644235	3.624409314	1.26879212	-3.17717659	-1.049392259	-3.036238792	-0.795740884	1.72977508	2.521163936	1.173059244	-2.073937163	0.829942539	2.418084761	0.160906209	0.436182434	1.635457657	0.734601063	-0.911374367	-1.161888481	0.663278066	-0.367789467	-0.439722693	-0.381462258	0.438469002	-0.129177202	0.728957132	-0.056313871	-0.791175856	-0.004245982	0.033688981	-0.364639621	0.249215467	-0.76098483	-0.208933255	0.162743663	-0.188224709	-0.047429999	-0.144943201	-0.044916771	0.296647859
2.834223284	-0.05698525	0.865980774	3.088228356	3.230048334	0.387548612	-0.264706962	0.950211574	3.641289595	-0.036291651	-0.772235952	2.041819225	-0.216314377	-1.328969465	0.010748341	-0.07554691	0.808387366	0.482093864	0.478232699	0.07656018	-0.362169365	0.412013921	0.528406503	-0.993890231	-0.528277353	-1.466758269	-0.254591665	-1.281950862	-0.376808031	0.56371214	0.138016626	0.435268449	0.342205415	0.901298496	0.101085851	-0.15108138	-0.357467034	0.48773929	0.213276746	0.493167051
4.423520942	2.345677255	2.204378379	-1.645223068	-0.984519694	-1.994967905	0.573636766	-0.502203689	1.782930896	-1.182608798	-2.014331399	1.988225746	-0.605841735	0.149454291	-0.198284999	0.127606858	1.116755442	0.136902796	0.020941775	0.541084633	-0.634353592	-0.582455817	0.677348857	0.373829493	-0.516075418	0.827845096	1.442809537	0.423542211	0.483850458	-0.128128884	-0.313963576	-0.043562489	0.066010176	0.296768985	-0.205084898	-0.078941066	0.354185101	0.268633012	-0.390963352	-0.189498008
4.227306308	-18.55688734	-6.736317602	19.20605843	3.77600865	-0.94332912	1.552180258	3.490063962	-1.054077623	0.382700077	-0.028560324	-2.288479255	-0.727652374	3.522913769	-0.330566776	1.799464721	-0.507994783	0.763565774	1.543773248	-1.331552876	-1.994043033	-0.916374473	1.774282676	-0.091076987	-0.336575415	-0.080722216	-0.882398514	-1.21438602	-1.431720439	0.089149185	-0.180329765	1.312848732	0.750882373	1.033876934	0.518129526	-0.083790126	-0.016706399	-0.108490668	0.450396936	0.197497887
10.556374	-1.653861544	-6.810100408	5.878518326	-0.136191575	6.589424883	1.856257041	-2.122365091	1.085844268	2.091807968	-0.857535806	0.436598611	-1.665142678	1.260215752	-3.093538541	-0.055859887	-1.937305214	1.701162982	0.77314173	0.018976203	-0.249041627	-1.038243528	-0.148578014	-1.026854704	0.547683087	1.049147721	0.852399946	-1.367407913	-0.325710583	-0.192289392	0.231712269	0.274302012	0.14716502	-0.549452173	0.083675967	-0.436294228	-0.610733928	0.326374023	0.352974236	-0.135122694
10.2008037	-8.609671892	1.411964355	-5.702367271	-2.733679873	-3.715346905	0.03923214	1.311296438	1.419235569	-3.701054778	2.385410482	2.973696681	0.711826716	-0.126538316	-0.297465875	2.645239337	-2.103738765	-0.387307323	0.747982305	0.098368886	1.235975626	0.385878005	1.424100561	-0.00036939	0.042800491	1.122072617	0.366808585	0.418744812	-0.001051353	-1.1537334	-0.246235956	0.937490909	-0.498238355	-1.109746285	0.024902103	-0.450057571	0.393537092	0.067695089	0.256816543	0.195257467
-0.078902793	1.370681059	0.874195341	1.546543374	-1.5996818	-4.100627412	-1.751621212	1.452684222	2.665157372	2.355087303	-0.147427916	1.012626672	1.55563989	-0.451403954	0.88607846	-0.401201295	1.396617482	1.035720244	-0.425582371	-0.683990022	0.822289962	0.065793368	-0.621689008	-1.522550998	-0.326312217	-0.311041728	1.280907077	-0.905504812	-0.423376933	-0.044321585	-0.022938842	-0.208511725	0.118957796	0.137282604	0.14700143	0.308013144	-0.00189564	-0.511891898	-0.014738162	-0.184266421
2.916408682	20.357445	2.104264931	-2.537148084	-2.316333641	0.230261446	1.756486957	1.648046861	-1.008530577	-1.612118353	2.884157673	-0.060518472	1.865176117	-0.18981765	0.866191624	-2.18841489	-1.46170155	-0.059067802	-0.129152187	0.714107346	-0.476527686	-0.740146884	1.288867425	-0.535820661	-1.028320629	0.24481493	1.089021004	0.486632024	0.262808065	0.895328138	-0.33316078	-0.440508332	0.387840024	-1.31228719	0.388212969	-0.300197186	-0.576419072	-0.377621363	-0.505694046	-0.357711219
8.734171854	2.340978747	5.874735322	-1.670080286	0.537999554	1.506095822	-2.327921989	0.186272777	-1.36300161	0.028898315	0.490856277	0.634624363	0.477734271	-0.125716313	1.125254948	-1.012116921	0.106890835	-0.906737372	-0.779082868	-0.321521462	0.644415592	-0.697778282	0.391951642	0.115568532	-1.115801577	-0.068346681	-0.005174867	-0.100743945	-0.51046276	-0.005080183	0.087233444	0.420916375	0.315039195	-0.11805844	-0.287945841	0.18637606	0.503620774	0.099940085	-0.326402023	0.434982537
25.7573075	-1.566624823	-13.40640374	9.255225416	2.262529284	-0.919103886	-4.863073107	1.770474441	-3.521350168	-2.060380278	-1.703296496	3.305944259	-1.551289155	0.178094929	1.265779104	-1.629977598	2.316894696	-0.163505777	-0.336893899	1.129587058	0.842317587	0.088488472	1.04197224	-1.406904107	-0.072939658	-1.06702772	-0.835159629	0.049900363	-0.418299322	-0.265388478	0.088589642	0.805211883	0.546215085	0.589930178	-0.53601568	0.80628463	-0.121460153	-0.299616048	-0.177852161	-0.19874684
14.17042141	4.85182007	-0.058939852	-1.43356485	1.3253149	2.400175476	3.077378018	2.21964822	-0.325885192	-1.463597122	-0.302003724	0.987087832	0.631712934	-0.541297331	-2.602789519	-0.49449505	0.670564383	-0.432373508	-0.918071553	-0.073879567	0.171156528	0.227194832	-0.990046003	-1.460613247	0.639099606	-0.196533221	0.326135287	0.809144844	0.137973665	0.845979226	-0.636158928	0.033743055	1.000417298	-0.553068539	-0.114400279	0.480799228	0.306173854	0.221380377	-0.165694966	0.768129163
3.631899821	4.382795884	5.217751535	-0.386041844	-0.446188692	1.698162899	4.07498327	-1.517878518	1.793605293	-3.238049621	0.240925008	1.07316254	0.617044407	-0.635083348	-1.973932643	-0.962829949	-0.871369533	-0.361514192	-0.35059158	-0.70959826	-0.193799971	0.08794287	-0.643168945	0.567387898	-0.288535533	1.148166593	-0.726866064	-0.094903582	0.192161628	0.250530549	-0.276933258	0.155893885	0.735186061	-0.224615813	-0.249608832	0.139300182	-0.114313199	0.180296584	0.168579847	0.625452292
3.329440977	12.98901348	7.181699947	7.242227128	-0.526949433	-0.370661284	-3.203200742	0.288232236	0.769069652	0.841288722	-2.653789002	-3.039758464	-1.421969218	2.888476924	-1.207721142	0.570100296	-0.225944147	0.191717184	1.345973618	1.00829547	0.642675406	0.206098578	1.123167177	0.551193501	-0.585292348	1.357770165	-0.3539413	-0.849693226	0.204110383	-0.445553007	-0.310946726	-0.802333908	-0.099747856	0.954180654	-0.466873233	0.753421927	-0.045206421	0.027270271	-0.337803437	0.0093736
6.594055618	-17.28177445	3.336383031	-2.064847071	3.340231153	2.369269525	2.079806418	0.783453975	-0.944412685	0.444217715	0.533020436	-1.623437096	-0.242652232	1.168987275	0.495136659	-0.550650524	-0.64825879	1.677099187	-0.184046303	-1.053227947	-1.408696837	0.089921265	-0.339184158	-0.606299154	-0.788485817	-0.86686494	0.056284182	-0.667831834	-0.700652161	0.128792865	0.08523146	-0.04482589	-1.143699415	-0.305776765	-0.741697437	0.50169718	-0.319994659	0.478675561	0.476524904	0.023451158
15.964423	-12.61753225	-6.711061864	1.759861742	0.030573023	1.836355242	-1.353274971	0.342329937	-0.024614632	-1.794154807	-0.448562918	1.543134356	-0.62797293	1.035325984	-0.210675862	1.601602409	0.34630315	1.351578942	-0.535995304	-0.160926554	0.371545674	0.131757159	1.40518429	1.550645228	-0.079978386	0.460848506	-0.207447695	-0.510236099	-0.062044924	0.106442178	0.161426317	0.326311394	0.356450399	-0.174272428	-0.038083842	0.168203329	0.682230651	-0.314629695	0.063131977	0.663588129
0.730540662	-2.573759265	2.227376626	0.425249242	1.466854908	-0.399317808	1.617926016	2.605994414	2.343649658	0.412586815	0.467536387	2.018793611	-1.408598034	0.494953399	0.442442361	-1.040077996	-0.274439291	0.019166305	-0.293553405	0.696699622	-0.209389574	-0.317005978	0.762317724	0.686358343	0.386679301	0.398970674	0.327160928	0.112140855	-1.562831283	-0.061903506	0.655354928	0.714941048	0.917847853	1.315834721	-0.783836615	-0.006036834	0.47876475	-0.300204802	0.134179597	0.195146635
7.930090543	14.39827361	3.100761258	0.57323615	5.647172663	1.42992264	-1.524644662	0.260239542	2.055826871	-0.93794757	-2.02893094	0.949515125	-1.166239754	0.17246177	0.876748548	0.603684948	-0.354772814	-0.894825626	0.265075103	0.51857937	0.719269146	-0.111817376	0.380704009	0.752813867	0.499461264	1.767098495	-0.08208952	0.194097312	-0.314031099	-0.29328807	-0.433705309	0.496601506	-0.462892183	0.211099222	0.512587896	-0.327291163	-0.05707953	0.156357223	0.488042204	-0.112173328
34.2660046	-33.29701269	-19.06009466	7.36479612	0.977024636	2.584633905	2.119947529	2.77622003	0.388868161	-0.257298593	0.299827454	-4.461053309	1.6166138	3.322184446	-1.661099632	1.408691963	1.796963346	2.853393628	1.402083171	-1.084707087	-2.511032499	0.992438027	0.903736433	-0.963010246	-0.40767531	1.151714909	1.400900275	0.522612727	-0.685922547	-1.402868957	0.551399374	0.654582865	-1.15811335	-0.02579052	-0.063283502	-0.382183667	-0.662948365	-0.434230386	0.203583552	-0.397655258
35.33062603	-25.27010082	-16.82889083	4.915765747	1.407366344	0.989879195	-0.972693566	2.21147341	-0.94885367	-1.367390131	1.955104036	-3.445846359	-0.107170538	-0.3775873	-2.018315503	2.121683289	0.409934942	0.221664462	-0.580021835	-2.228710416	-0.130699201	2.059790528	0.661793144	-0.04755279	-0.99969074	-0.323174632	1.241447083	-0.300837823	1.103550002	-0.153205814	0.454959918	1.469405486	-0.264204462	0.070534632	-0.269908044	-0.401735497	-0.243657712	0.471790412	-0.155500492	0.380102657
30.9852008	-36.16277195	-21.36296463	7.656381162	-1.066450049	3.094796346	-0.5688796	3.812524881	-1.821693069	-1.04667457	2.399767674	-1.735672597	1.602369344	-0.708851269	-1.424737836	0.203910462	0.893754078	1.923366799	1.792975422	-2.540315169	-2.408921809	1.822387314	1.630965569	-0.05575795	-1.153586786	1.602513402	-0.058976396	0.394433551	1.037384883	-0.555825019	0.178658559	0.620452362	-0.729027414	-0.06073302	0.313597844	-0.413224981	0.845480169	-1.084838708	-0.249607336	0.642227081
29.36029589	-28.14853938	-14.13701959	2.714154462	-0.077713163	4.731168581	-6.058219362	3.617594219	-0.071272287	-1.475078322	4.060556946	-1.855460759	0.678854505	4.449288722	-2.258710289	2.16073797	-0.768041647	0.549925182	1.016663725	-2.016056546	-0.027083675	2.319358696	0.812196304	-2.124479346	-0.841759082	-0.14310156	1.392334334	-0.501896406	0.549166915	-1.199297761	0.339855688	0.51359858	-0.331128747	-0.517992487	0.628231009	0.311032749	0.341964947	-0.30528466	0.347201988	0.272668288
23.11724649	-22.29436839	-8.322985645	-3.003177343	2.75643401	1.315797237	2.180205164	-2.628700692	-0.610894918	-0.089817487	2.839864248	-2.744897759	1.711024957	4.861763875	-0.38839924	-0.10524592	0.092989491	-1.311600287	-0.635914795	-0.755512763	0.999204664	2.386274068	0.909495331	-0.526711291	-1.107778006	1.135516966	0.430883139	0.691965628	1.451236088	-0.974247075	-0.331217291	0.817157999	0.362018113	-1.233775826	-0.008364813	-0.017346492	0.162980178	-0.282991653	-0.039212012	0.198881118
35.08561525	-21.81005739	-19.12994471	-2.259770324	-0.402083793	0.130261885	-2.75919176	-0.971442073	-1.961776178	0.499834747	3.062829359	0.749284067	0.366828906	2.587116158	-0.578789809	0.060890758	0.219490657	-0.044470266	0.812486789	-2.567183957	-1.841368724	0.527093452	0.962198379	-0.290418466	-1.115031339	-0.276245946	-0.134854467	0.165168007	0.494245889	-0.193327217	-0.10699498	0.784958792	-0.836540241	0.472629041	-0.067693469	0.290499503	0.060093841	0.060673776	0.172287683	0.251686359
13.26165973	-0.8779267	5.05119452	2.464451869	0.179221511	2.478002944	-2.654709476	2.548443101	-2.239335797	-1.789362801	2.785419923	-0.328152129	1.384099307	-2.973877994	-0.312778559	1.44540667	-0.90440093	0.450261812	0.973691684	-1.502779531	1.734677622	-0.86163983	0.162383052	1.229184877	-0.634522321	0.141783928	-0.645696838	-0.539809938	2.11681238	-0.268050493	0.322606707	-0.138421924	-0.342672935	-0.372475486	0.360684946	0.414847826	0.518914185	0.180354944	-0.046949488	0.723356806
21.64612257	12.42438153	-1.807122148	6.760756691	-0.290343372	3.233771984	1.156235553	-0.50948723	-2.169394858	-3.463982843	-2.392742619	1.501637723	1.535581236	0.43287512	1.64740026	-0.844930527	0.742031494	-1.242257935	-1.475864199	0.435086684	0.449937847	-0.673206441	0.77283737	0.86415762	0.631406773	0.149018418	-0.607514805	0.107250415	0.465506861	0.604687848	-1.347465561	-0.134014965	-0.311250642	0.540273459	-0.729459478	0.54727596	-0.50335048	-0.159571287	0.060119101	0.303551417
15.79022253	-10.24333465	0.818239695	-0.234296336	0.157646175	2.991698885	2.22814358	3.71100234	-0.274845544	-0.408246641	-0.731745622	-1.089595263	0.348719674	0.088736196	1.415468943	1.652588003	-0.198325279	0.134396315	0.344749194	-0.223817909	-0.767261965	0.301009284	0.990412509	0.95204704	-0.15475971	0.009684974	0.255032759	-1.101430351	0.365960868	0.661160096	-0.005733026	-0.292448743	0.364669581	0.554506287	0.284698871	-0.508596374	-0.139142181	-0.403483887	0.592081042	0.045607443
-1.854237285	3.966657723	0.054633307	0.268741682	1.181183329	0.61303903	0.596502454	0.556281978	4.274183696	3.960806207	0.997624756	1.472451513	-2.449867769	0.079152971	0.486685721	0.544451724	1.792296811	0.804153183	0.41011997	0.330324519	0.146527326	0.687769423	1.703122023	-0.906661796	0.403872328	0.407637503	0.849598505	0.452637142	-0.119936558	0.217164009	0.157470728	0.245088916	-0.214150897	0.037751081	0.462035393	0.406306853	-0.172490045	0.423654873	0.267264171	0.211858353
1.436894188	7.124899899	-14.97851786	7.139214815	-0.941645389	3.638231135	-5.151134694	4.347942926	5.338462694	-0.311847494	1.221366606	1.278448034	-4.036235377	-2.110446414	1.355889942	0.859416628	1.215174402	4.036834018	-0.812637581	0.86414468	-1.980024956	-0.773839121	1.478156942	-0.507709477	0.136558112	2.538561241	0.903503881	0.27249303	-0.179163873	-0.281510465	-0.368280046	-1.321089821	-0.183376417	-0.150303124	0.778609414	1.637145253	-0.123857934	-0.460328737	-0.466260897	0.815193565
-4.233181068	-20.54661678	5.597041752	6.111357794	3.23401954	-3.402422835	2.849270546	-0.335213965	0.078256896	-2.663627716	0.582251028	-1.709423658	1.572026186	1.927216667	0.654459897	-0.928162284	-0.24821019	-0.099775047	-0.515344506	-0.252790181	-1.768687084	-0.564517466	-0.14139186	0.868699483	1.801552014	0.498195529	0.213838656	0.247317157	-0.519639039	0.710941454	0.056920427	0.131855852	0.73768673	0.626937107	-0.377744542	-0.550569394	-0.228187048	0.355819841	0.092692537	-0.539772885
-3.887376622	-19.62780847	2.927773375	-2.332007042	4.361383927	1.723262514	1.496002713	-1.498814381	1.198125309	-0.453569067	1.14681147	-0.065183135	2.294400157	1.182115686	0.741624608	0.787362741	0.521468151	-0.573961405	-0.421482211	2.261170392	-0.485862178	-1.077294834	-1.433920613	-0.005543009	-0.271340446	0.308208335	0.953617826	-0.579340468	-0.436310878	0.52887009	-0.374881131	0.28195207	-0.204662964	-0.223599737	0.056346362	0.410603865	-0.438603949	0.460109082	0.696904099	-0.016013075
10.31363378	0.040799068	4.878588929	-0.250612237	1.760058906	-2.480010236	1.297211817	1.492401491	-0.073182284	-0.11462175	-0.019263926	0.597786807	0.347073361	-0.125277511	-0.829598519	-0.658502416	-1.190756127	-0.789299809	1.21775708	0.152999195	1.157782149	-0.47909895	1.47332497	-0.191852927	0.408300384	-0.214820778	-1.006493501	0.452252445	-0.290921861	0.187425216	-0.420505913	1.15350139	0.265190833	0.014585838	-0.345154071	-0.228550128	0.335060213	-0.305065487	-0.041083747	0.244135407
-2.612652426	-1.353659195	-4.875765248	0.014206844	-3.43651758	4.781689799	2.969384849	1.74489022	1.184788622	2.690551853	-3.965996746	-0.757419844	-0.701841535	1.961009794	-2.257726172	1.055725535	0.24947803	0.65410458	1.174625114	0.818650631	-0.897860104	-0.902657181	-0.084038805	-0.295206559	0.958245413	0.654893603	0.447505855	-0.211301883	0.847412947	-0.102270269	1.286661891	0.293378706	0.34812627	0.221468804	-0.319042318	-0.83345239	-0.286062487	-0.385685573	0.221185675	-0.186690497
-5.896921385	33.59369998	1.842456015	1.723807487	-0.796025717	2.878563707	-2.142491894	3.923137714	3.115749	-0.357165887	1.295360442	-1.902002318	3.541673705	2.004780131	-0.817008444	0.170668993	1.349542984	1.870464987	-1.048040432	0.243528587	-0.101446563	0.360610783	-0.330572048	0.23393456	0.284684984	1.238568361	-0.364892946	0.751702658	0.081562406	-0.36526766	0.043800357	0.159094899	-2.094916676	-0.337892568	0.03099448	-0.573716465	-0.300860541	-0.625324488	0.225441352	0.431932518
9.706338733	-5.402824419	1.932247812	-0.814683472	-1.103564812	1.156382884	-2.001512241	0.486067674	4.07832537	0.454346972	1.190614657	0.819126129	0.142062526	0.255951866	0.451058353	2.269953187	-0.559751021	0.134172879	1.113179831	-0.583077249	-1.505971043	-0.092002336	0.273762637	-0.949008878	1.458328612	1.014998162	-0.650456577	1.017968651	-1.38921409	0.0319665	0.39479507	0.281613017	0.019328268	-0.318763513	0.138900892	-0.675202949	-0.397455604	-0.466417141	0.095179472	0.439589224
-3.457502337	27.29674769	6.015554916	2.443964249	-1.925369422	-4.323429346	1.959360337	-1.4431547	-0.472742918	-4.324071867	2.690091788	-2.60237278	-1.650648799	0.607036931	-0.322623912	-0.210356872	-0.470060783	0.103864478	-0.19477193	0.861339088	0.201238463	-0.345418109	0.918456715	0.913619059	0.008842402	0.143341713	1.131537431	0.122134327	0.33998563	-0.433407293	-0.151956123	0.187881703	-0.532452151	0.282837751	0.115191708	-0.079403188	0.043616301	-0.400681554	0.327937118	-0.170175099
-2.988443972	3.919146907	1.974936078	-6.815364654	4.376724047	-0.539670163	3.469048411	0.133989001	-2.406538996	0.43172152	-0.726215659	-1.940086258	-0.202496395	-0.071935227	1.890458684	1.030768687	1.968860353	0.678408775	0.071942423	-1.097439118	0.125580578	0.110237908	0.036480226	0.77118866	0.753844181	-0.65086844	-0.735795356	-0.981312672	-0.052173333	-0.130928891	-0.691928056	-0.302751693	-0.047791362	0.212536766	-0.757924337	0.077430547	0.230734692	0.377912641	0.133130067	0.41954004
14.45873301	-3.515009365	6.145056809	-2.355188319	1.864925657	5.302851655	1.458620604	-2.603392716	0.001771487	-0.13984346	-0.956515927	-0.788672529	-1.561354035	-0.68228048	0.616725395	-1.540927737	-1.148825894	1.029002528	-0.620688657	-1.665302272	0.557338924	-0.232040438	0.177091953	-1.11620089	-0.161385669	0.598368758	1.233414486	0.29936083	-0.111533253	0.7018424	0.037645432	-0.490739546	0.055981282	-0.10017365	0.289627538	-0.16692474	0.519782212	-0.136649052	0.504662517	0.278330765
2.256743265	16.51377477	1.706267608	-4.135635088	-0.033945918	2.649428308	1.652303296	0.148854097	3.417781284	0.440408899	-0.093188149	-1.750257874	2.159219036	-0.555824899	0.994864088	0.781395141	-1.064425198	-1.932974283	-0.998500141	-0.611308932	-0.607700224	-0.837386766	-0.862040896	-0.098326043	-0.251356202	1.088101606	0.285031906	0.555608532	-0.159547034	0.44021162	-0.90963222	0.13957673	-0.240354632	-0.487228393	0.621778896	-0.903339669	-0.025052302	0.308666285	-0.157439224	-0.182958295
-2.834853042	9.471795426	5.285938658	-5.915060673	-0.96626327	0.600994733	1.747860161	-2.253562021	2.201119534	-1.314894053	-0.032895354	-0.460492338	2.36075088	-0.098550075	0.504364631	-0.131353231	-0.590548933	0.655990781	-0.664824809	-0.120026524	-0.883496274	-0.648016522	-0.56453359	0.157621608	1.329754095	0.076641602	0.613842667	0.489593802	-0.374821075	0.158294575	-0.249235121	-0.270885536	0.253844637	-0.268612864	0.007502901	0.171007818	0.081657842	-0.15224264	0.054947053	-0.173666917
-1.986565977	6.036903877	11.18143833	-5.585819299	2.283864123	0.738674511	-1.83717774	-0.810029888	1.402951372	0.321217133	-0.284283078	1.099604753	1.077156891	-0.059654147	-1.077796585	0.228608704	-0.080781604	-0.412106369	0.785440034	-0.381079333	-0.008830198	-0.23980155	0.222073552	-0.477338691	-1.664319567	0.980956487	-0.05893445	0.122996997	0.691224674	0.560629879	0.733800726	0.388615447	0.160837203	0.712922174	0.314364235	-0.342313979	0.099862249	0.274997069	-0.237912741	0.183338627
-2.668416018	8.751674756	12.62380861	-0.486614457	-1.05562605	1.629738059	1.302362801	-2.156116583	0.469389486	0.130181163	-1.496108528	-0.127375987	0.199087214	1.28958641	-1.180935773	-0.079320703	-0.695253842	0.34874021	-1.120898718	0.14557795	-0.516352931	-0.654970756	-0.870353995	-0.245439849	-0.22611109	0.076535005	-0.32436426	-1.0899445	-0.771045142	-0.031503626	0.11289594	0.820303683	0.434142834	0.223514629	0.56317261	-0.153048795	-0.257445092	0.179550968	-0.219022463	0.187126397
-1.646225008	-1.432483671	3.308752126	3.156664447	-0.327330848	-3.901727641	2.930878859	-2.259623568	0.602663565	-1.140586677	-0.80322356	0.816118415	2.806950773	-1.914767013	1.81370306	-0.082509578	-0.379327706	0.035444613	-0.04534537	-0.310037405	-0.080697388	1.653778172	-0.84267531	-0.698875566	0.397338736	0.486725506	0.715528971	-0.720557607	-0.407888478	-0.26034757	-0.171202874	-0.367535135	-0.276817397	0.784010302	-0.253147851	0.66663784	0.320788618	-0.149405606	0.366083196	0.30741368
-4.25245001	27.33825569	-2.387673558	-0.97021543	1.281739743	2.971032275	-0.154113027	-1.1810513	1.85398897	-1.781957333	6.707808884	0.05705044	0.706278241	1.036357715	-1.564633407	0.477842735	-0.564126979	0.273178535	-0.20004088	1.548257602	-1.10140668	-0.358554801	0.92934295	-1.642974426	0.296083074	0.014559262	0.701589207	-0.393758876	0.041088146	1.107304761	0.296902471	-0.040868431	0.383763484	-0.530186996	0.078066217	0.182536889	0.011919886	-0.318319362	0.330062187	0.090860582
-5.3387727	16.70757536	-0.163872096	-0.157348079	2.168986129	3.512115038	0.090350169	-0.950756757	1.16422224	-2.082248048	-0.471582322	0.166677914	0.645575491	0.931930678	-2.656279164	-1.685491536	-0.612832806	0.625093021	1.448184007	0.34305268	-0.690850412	-0.055498423	0.609380629	-0.243341157	-0.160605019	-0.547182291	-0.043197771	-0.103726747	-0.622713806	0.77303519	-0.363320002	-0.033991478	-0.010320483	-0.429706574	0.686960968	-0.52258863	0.233037803	0.285193457	-0.083424417	-0.207854938
-4.913960739	3.081893494	0.98544937	-0.141047507	1.659540353	-0.056525351	0.60200004	0.122635278	-0.328094706	0.29966276	-2.043473863	-0.209905381	-0.380898548	-0.751466754	0.245162027	1.342687252	0.503876563	-1.242902645	-0.102946029	-0.373631072	0.244116557	0.688240642	-0.65746412	-1.388575993	0.24004857	-0.493064567	1.396470606	0.51185922	0.163068686	-0.116745578	-1.124093389	-0.852731611	0.667551258	0.410994604	-0.030199858	-0.45739821	0.610771896	-0.076763403	0.542060899	-0.266978916
-1.917409675	12.71185769	2.257789776	3.387740623	-2.802823913	1.339508982	-3.289848053	-3.948334398	0.139065367	2.89884921	-0.421916463	0.536824684	2.872435993	0.023529045	0.108215076	0.002132488	-0.937378435	-0.003182496	1.904282288	1.58567667	-1.45070188	0.170243218	0.627375639	0.026946972	-0.282600251	0.298536787	0.083082474	-0.621608905	0.694176814	-0.002067811	-0.126365515	0.274260351	0.455143487	-0.291427598	0.009637315	0.260844272	0.060104531	-0.516703527	-0.087943132	-0.15706367
-3.143365238	21.87395593	3.6319364	4.545744618	0.109616272	4.439207379	-0.150776256	0.556522389	-1.370254607	-0.959875591	0.495428786	-1.448577078	-0.332998765	-0.192469777	0.078231007	-0.41726742	0.42870816	0.20773155	0.130548195	-0.312157942	-1.223752873	-1.163430086	0.187722935	0.597332331	0.894510644	-0.885481767	-0.499054559	-0.658415724	-0.09619793	-0.906661063	-0.338670897	-0.093349523	-0.735617613	0.174922957	-0.05721686	-0.55992848	0.009928403	-0.204585916	-0.049593247	-0.265228502
-5.068575556	29.01157348	-1.639970047	0.986323683	1.789837521	0.715510407	1.695595951	1.59709609	3.078729073	-2.552830426	2.998515914	-1.657565423	1.384767264	-0.431679558	-1.616172972	1.311186296	0.595752386	0.559553811	-0.889847281	0.082907452	1.731204707	-0.659532389	-1.354759445	-0.546052842	-0.056709616	-1.038132478	-0.238925728	-0.145369221	0.134501217	-0.761645602	0.000566672	0.293432137	0.125117305	0.393316309	0.461346444	-0.130893883	-0.252380865	-0.060703061	-0.009405802	-0.068091884
3.164980688	-1.227913633	2.390684864	4.528745155	3.374241504	4.269553115	2.273705395	0.052678443	2.922725996	-1.763813559	-0.539303859	-1.750745931	-0.39102951	-1.575752557	-0.883262266	-1.412967603	1.484367274	-0.39984952	0.972826694	-0.983660299	0.562682465	0.428952436	-1.429848845	-0.238072342	0.259683074	-0.464048619	-1.213559552	0.10008785	0.288540715	0.598977554	0.26972673	-0.648000965	1.094493852	0.161127105	-0.101730776	0.100171949	-0.13047828	0.240550017	0.241568001	-0.347791339
-2.666847014	-3.630371228	6.982582043	-7.553887136	-0.736653595	-0.543667374	2.668615559	-2.114123396	2.283946041	-0.663815216	0.761870697	-1.148476497	0.178970144	0.890311553	0.959344542	-0.667919637	0.093958342	-0.536634469	-0.120456185	-0.179059193	-0.142876832	0.559647388	0.244510724	0.08925171	0.339954765	0.052873422	0.249699274	0.537469846	0.086613268	0.165063031	0.043371745	-0.101762579	0.448712199	-0.355800461	0.021212173	0.252581162	-0.265796316	0.031943739	-0.133269715	0.200625447
4.364630409	13.81409512	9.931178349	-0.365151192	-1.954858085	-0.950341913	1.334419826	0.880328904	1.269089421	1.600265555	-0.848625837	-2.075039849	0.640188857	-0.638051512	1.437678839	-1.510078215	-0.051336839	-1.307172267	0.28774766	0.175534433	0.462706277	0.538612303	-0.854130856	-0.485335428	0.574484827	-0.729236238	0.910061978	1.359298021	-0.90146149	-0.263960139	0.54350505	-0.449147559	0.083435946	-0.404098943	-0.239734888	0.33037412	0.739228956	-0.445089321	0.134454244	-0.302561604
1.583909546	-14.48796694	7.768904911	-2.098459111	2.039638152	4.167568368	2.71334747	-3.094901885	-1.158580489	-1.128971999	0.51765197	-2.01140923	-0.256565692	-0.133308612	-0.180993794	-0.39227283	-0.636454496	0.048731967	-0.135479262	-1.267681578	0.378423976	-0.284955711	-0.048185609	-1.130588904	-0.412681106	0.123569976	0.298357978	0.135911693	-0.255641818	0.50114888	0.297504092	0.440151977	0.03564107	0.017076066	-0.447838789	-0.501742556	-0.41284837	0.164382513	0.110530632	-0.318238263
27.8452511	-18.4438151	-7.053280859	-0.166860279	1.40815083	3.418487686	1.309074171	-2.666642543	0.89761094	1.403424196	1.19444609	-3.122537727	0.157810999	-1.178668944	-2.32000354	0.477162009	0.602699588	0.795424294	1.044297974	-1.170517598	-0.316632984	0.571701779	0.939516624	-0.011947122	-0.945428419	-0.376702502	-0.022720438	0.130999959	0.302601173	-0.457629008	0.946912695	0.158991718	-1.038051706	0.256097188	-0.058265709	0.192778702	0.296537846	-0.301879328	-0.227460906	-0.664757669
8.277176696	-15.85869167	10.47070514	-2.160984501	2.91956916	4.698601413	3.572243624	-1.000189204	-0.424426449	-2.694656825	1.340880239	-3.851239677	0.919635662	0.839233173	0.132188484	-0.648846525	-0.391205867	0.513697765	-0.215078735	-0.743270063	-1.131075572	0.781248605	-0.576989784	-0.440483552	-1.388896232	-0.035046273	-0.215562132	0.081144701	0.180617895	0.705867658	0.051331674	-0.391716048	-0.678893967	0.411159935	-0.297683935	0.137337643	0.349507777	0.301198722	0.50794396	-0.592528755
4.905397712	10.73425344	6.632232947	-2.345044639	2.117218606	3.47610385	-0.109937795	2.095127622	0.987264414	-0.223418312	0.873642508	1.187461728	-0.085145052	1.17396062	0.868051717	1.823847052	-1.070848739	1.691595612	0.635376679	0.054635644	-0.430228524	-1.588871165	0.25003266	-0.671010723	0.268229437	-0.107130932	-1.594392418	-0.040447599	0.08555851	-0.272283118	-0.555921787	-0.120575947	0.371031745	-0.197791275	-0.108186431	0.375793957	0.773364926	0.213315945	-0.138914546	-0.384474596
15.5253253	-9.084192101	-2.431720072	1.134324587	3.126598556	0.514042634	0.888702226	-1.088095906	0.042398485	-1.364863113	-0.53435539	0.652126746	0.951093485	1.674645832	0.66139874	0.562436371	-0.395917075	0.314042763	0.235821113	-1.429328187	0.024498071	0.165138273	1.448992733	-1.099242814	0.603322088	0.367252678	-1.038460554	-0.343162459	0.336778818	-0.128498636	-0.681027331	-0.812162912	-0.04325672	-0.618613425	0.410640138	-0.355766901	-0.304106202	-0.316564776	0.232287491	-0.282867761
2.430435931	2.44894778	-1.748274779	-1.126758238	-6.698985476	-2.212047929	0.376436937	-0.565948175	0.310644862	1.542595719	0.011541213	0.086115291	0.701906471	0.464438583	1.87575622	0.533626405	-0.097254066	-0.561456349	0.118621436	1.396848906	0.239776571	0.436736796	-0.252262519	-0.176831111	0.551352594	0.414549085	-0.238126301	0.336077765	-0.488571128	0.211191788	0.322091417	-0.574367673	0.095393329	0.476608363	-0.15361493	0.780501781	-0.426431758	-0.340772885	-0.29162046	-0.541093081
3.968622682	-9.72664067	-6.187949253	3.156669803	-3.491037981	-0.796755361	2.927987943	3.321277158	-0.250409191	-2.938541454	-1.74171606	1.182588929	-0.779608211	-0.927461618	1.47249342	0.638209776	0.296078369	-2.239190333	0.640786772	1.848131781	-1.847068873	0.04921536	-1.240192607	0.834590044	0.084009916	1.319687705	0.56111269	0.078364924	-0.495755587	1.316954851	0.517351775	-0.035870946	0.283627701	0.838812013	-0.408364549	0.082376047	-0.355932632	-0.048497403	0.427916035	-0.732494547
9.208723083	5.39742422	1.183848722	2.675641805	-5.205201469	-2.221301374	3.509267774	1.304297995	0.751051025	1.669411123	-1.08447596	-0.598138597	0.322779661	0.702870781	0.441289183	-0.640668833	-0.514107351	1.019421032	0.862296774	0.668428976	0.409788696	-0.773130296	-1.508533542	0.824408722	0.479835967	-0.372180832	1.314508387	0.868867497	-0.286532225	-1.111151116	-0.303632281	0.299013855	0.634071043	-0.512775055	0.119101817	0.771872321	-0.904316989	0.292450803	-0.252723592	0.277509921
1.998488891	-0.824199619	1.008165037	-2.428836497	-1.526893733	0.26133202	-1.601074624	2.262112428	-1.743359937	-1.05526048	-1.038273502	0.840283584	2.112276644	-1.471387385	1.48348399	-1.293802794	0.134453966	-0.346552599	-0.659672811	0.445240477	0.330108236	1.492775561	0.275566783	-0.091329397	-0.565415676	0.341077147	-0.327808703	-0.294041523	0.433603677	0.031965513	0.707639754	-0.552639474	-0.066759906	0.056930323	0.767844083	-0.122700296	0.249926554	0.191010311	0.00439043	0.14143974
11.86711595	10.51186109	-1.115289445	0.287853721	-1.165999559	2.918153378	-2.460920144	-1.072811696	-2.683322814	0.603953988	-1.305288608	1.510436172	-1.033366926	-1.669098329	2.096457645	0.46224046	0.016422131	1.307083616	0.892687056	-0.196832094	-1.820520276	-0.127262305	0.451757533	-0.422513843	1.203454685	-0.438841722	-0.213800842	0.994864171	0.21098645	-0.138619282	-0.260635988	-0.984524004	0.79554375	0.670802571	0.104637663	0.391584298	0.582504099	-0.340937375	-0.171667594	-0.288554105
-2.661195672	22.25678649	-5.025583594	3.86317979	4.50848613	3.956904108	-2.093352461	-0.956855396	-0.807966292	-2.656160307	-0.265494939	-0.151425131	4.279218943	-3.701478125	0.228510873	-0.094335084	-0.541963629	0.637097456	-0.901700908	1.143457823	-0.132873671	-0.171756514	-0.663378021	0.757157844	-0.096417994	0.499827852	0.295585005	1.111950191	-0.200289851	-0.267512791	1.184051016	0.027670127	-0.340718883	0.247917606	0.026358349	0.121713306	-0.308648878	0.245935993	0.175582342	-0.129385711
10.50873627	15.84076422	-0.671303074	4.564461105	2.523573869	-0.891667713	-5.149393843	-0.804112179	-0.654032091	-1.045865659	-2.022169284	1.954859692	-0.153186902	-1.070174087	1.27564911	-2.286708593	2.104970104	-1.538994145	-0.799685264	-0.172519364	-0.05240615	-0.071086338	1.320421694	-1.290425186	-0.683097689	0.878129042	2.210847944	0.154058332	0.446671834	0.413251391	-0.476174373	-0.89777882	0.068991017	-0.025775372	-0.003912412	-0.401562746	0.278307384	-0.435304435	-0.405967456	-0.787101566
12.62835646	-7.890518595	-2.474660898	-1.930117162	-0.035337883	1.362608632	-0.350486922	-0.186373678	1.807370121	-2.632180433	-1.040632236	-0.801310314	-0.56016437	0.360970488	-0.535608844	0.129032621	1.399600742	-1.168238205	-0.974796644	0.982640288	-0.587263897	0.260273065	-0.453849238	0.34410975	0.234550883	0.295038859	0.209814084	-0.079020301	0.64666361	0.501576363	-0.020512375	-0.408248178	0.267728822	-0.398919032	0.943357665	0.130939503	-0.152905887	0.638433944	0.331750868	-0.472199368
2.060205499	14.85821264	1.802364389	4.512222686	-2.382400363	-0.937878537	0.962456304	-0.481951409	1.152699043	-1.040025111	-1.631432341	-0.481822455	-2.781098014	0.386118439	-0.849155413	0.463578346	0.804859303	0.028439767	1.389616791	-0.156049135	-0.69771647	0.768865956	-0.688852882	-0.387562799	1.151671473	0.158518671	1.124177119	-0.557315473	0.228530998	0.110158655	-0.674239818	-0.281716156	-0.354042637	-0.128085871	0.017661903	1.099938899	-0.27421446	-0.211178009	0.403088029	0.542357612
9.306218682	14.15475094	3.496493197	1.732505053	2.526523407	0.727464521	0.183565904	0.75464885	-1.948756982	-0.363609256	-3.147216195	2.508318765	2.559511301	-0.037966692	0.615299996	-0.178804897	-0.805688791	2.129337317	-1.217285901	-0.256501806	1.633139626	0.235426535	-3.038807362	-0.437334906	-0.132228089	0.547369733	0.144454429	0.391007946	0.546433791	-0.001086376	-0.821190449	-0.074480995	-0.040333288	-0.755774652	0.164948772	0.053147777	-0.159387116	0.267394207	-0.07242305	-0.502605584
6.194352379	-12.72150685	-6.111565492	4.831393644	1.412291987	6.151751863	1.99059391	0.327229454	-1.028236672	-0.216230018	0.87189804	0.985583609	-1.344191229	-0.128169827	0.481008845	1.536061656	0.913528647	-0.719604626	0.903544848	-0.260172138	0.218618602	-1.243491181	0.300282615	-0.073727253	-0.107144927	-0.87276883	-0.216277138	-0.40708743	-0.85068977	0.847865029	0.601850319	0.411217494	0.124214626	-0.026890809	-0.029392843	-0.306986092	0.037322081	-0.123057835	-0.250574332	-0.059956374
-0.087559657	5.358159938	1.729628395	8.75234508	-1.510530688	3.212486856	-3.158377544	2.623011922	0.060511852	2.805552611	-0.176992846	1.134967552	-0.665723772	-1.970909413	-0.310718232	0.684398535	-1.277271004	1.090155386	-0.574153382	0.658853572	0.274396509	0.372140204	-0.140928184	-0.811247477	-0.853813993	-0.740656292	-0.725780104	0.436639497	0.15260813	-0.296521742	0.187838953	-0.634204077	0.534185502	-0.467508383	-1.596086207	-0.106556564	1.162978349	-0.319397773	-0.106223681	-0.165694825
-5.080164383	27.23933165	-3.05146793	1.891878276	1.231123128	-2.858131583	-0.545076974	0.932443786	-1.791629245	-0.475315	0.605393749	-2.760911865	0.929623453	2.593375566	0.915139834	0.513253447	-1.508183355	0.239275639	-0.154356398	0.684735484	0.915436308	1.020532514	-0.558642452	0.684874307	0.613605413	1.934368307	-0.901622392	0.318297025	-0.166564964	-0.240642664	0.457774096	0.737048636	0.117484124	0.363698267	-0.009357891	0.570609634	0.053714496	-0.250270348	0.425488363	-0.377260151
2.750023053	0.497232051	5.227804828	-3.391547539	-1.371803738	2.771843329	-0.451411304	0.066408321	1.811119668	0.636420963	-0.312827004	-0.699242066	-0.458295048	0.952809862	-0.255707664	0.207409924	0.073594076	-0.482068925	0.311046259	-0.383335594	0.732354965	-0.138741231	0.149319192	-0.960513909	0.038471194	-0.133243	-0.636949083	0.094597474	0.093190921	0.885980656	-0.271985242	0.162627448	0.413359138	-0.234221615	-0.327447975	0.080812844	0.06285811	0.550591812	-0.489567352	-0.448302381
6.11150405	-1.049719703	6.194453612	-1.22471027	2.288641392	4.013143465	-2.560747284	-3.760562989	1.512378503	0.116522587	0.091206903	-0.397984474	-0.476983676	-0.373418391	0.635466988	-0.322584944	0.576987108	-1.460800023	0.401062674	-0.197096229	1.070528888	-0.674889887	1.366738722	-0.366668561	0.076277842	1.020646797	-0.584259122	-0.235582743	0.027894187	-0.302792834	-0.069539709	0.139783661	0.226384438	0.209660473	0.610302525	0.04683469	0.343325275	0.625478102	0.034501729	0.376583499
12.10135009	1.643037288	-1.784359626	0.616220447	-1.837207103	0.356312831	2.453012406	-0.551292103	-0.070873559	-0.684572025	-1.922252754	0.931016295	-0.365960283	-0.842827107	2.083185552	1.439369458	1.257276018	0.002796889	0.92829965	1.562477978	0.486898789	1.089655676	0.043573379	-1.101923524	-1.315828041	1.521675055	0.621978873	0.001406941	0.298429357	1.036339231	-0.506524157	0.139325788	0.387440141	0.558007218	0.563365157	0.201265535	0.222337361	0.297689515	0.3230169	-0.233889841
2.080644729	3.54274319	2.699516584	3.892086705	3.295739701	-0.440239871	0.427195232	-0.782708269	-1.216855685	-0.808427496	-1.07286613	0.817439642	2.297644705	0.43624339	1.543366985	-1.511538985	-0.220778221	0.699983628	-0.756696545	1.063738993	-0.919623957	-0.249113933	0.935962328	0.442582152	-0.167503624	0.46308868	0.127480617	-0.556491963	-0.561049814	1.107383781	-0.520354993	-0.261199938	0.393333721	0.194224087	-0.007017917	0.099638175	0.502154037	0.358756858	-0.018450847	-0.051777674
10.14323794	-2.920458253	6.262970772	-4.453300371	0.272320303	-0.720623813	-0.750130374	0.341349861	2.770409377	0.144267701	1.429956978	0.276072776	-1.093717976	-0.308861225	-1.695136736	-0.834181339	-0.443049889	-0.038956408	0.016285412	-0.387227818	-1.22502707	-0.399286804	-0.648052195	-0.716077512	-0.811978994	-0.271794183	0.727482245	-0.197632654	0.219940696	0.478112843	-0.178423382	0.28276556	0.56014034	0.45291772	-0.522085907	0.613175717	-0.152224819	-0.275138991	-0.15793594	0.147038822
26.32232545	5.971004359	-0.418192771	-2.606325979	-2.517944657	-1.844865983	-0.307106492	-1.859206336	-2.460578799	1.000538298	0.235303094	-0.737239902	0.313825118	1.604608569	0.77408874	-1.750465617	-0.039591712	-0.829754811	-0.766959273	0.069029728	1.51485883	-0.629625531	-1.202354392	0.783957266	-0.155775775	0.130098777	0.294179678	0.067242804	-1.398428406	0.261669705	0.309211737	0.177801034	-0.012135031	-0.069167064	-0.158977619	0.545590977	0.011096261	0.23802414	-0.062720702	-0.673198231
14.87125483	-2.156940775	-0.888787529	-1.991593231	1.365858906	-2.591241238	2.160142799	-1.197197386	-0.27314064	-0.175548195	0.750726066	-0.480605363	-1.065695974	1.855950345	-0.24901029	-1.495054707	-0.483886919	0.820711404	0.693651722	0.266124104	1.24067876	0.482071854	-1.566318218	0.021555314	-0.211294564	-0.149991113	0.110145216	-0.015301185	1.025717546	0.153734122	-0.660831248	-0.642525223	0.255523889	0.132917437	-0.758715276	-0.15685091	-0.975140856	-0.349539614	0.735790026	-0.15168802
18.36244185	-16.16785025	-4.98963569	-1.777405948	0.165907777	4.71579132	2.53242645	-4.598806361	1.156993006	-1.090686347	2.426064261	0.997350308	-0.575855412	0.817307092	0.355762359	-0.206703385	1.491744077	-0.146315527	1.342788254	0.673200697	-0.032426244	1.09529237	0.436338354	-0.022968308	-0.687233471	0.90786947	-2.025861256	0.356343783	-0.146915341	-0.406258072	0.233033951	0.568679137	-0.867183514	0.633952751	0.305965959	-0.576996389	-0.256622014	-0.297082525	0.287812027	-0.651900606
30.73990732	-6.955199458	-3.302409798	-1.018818531	-2.058693786	-1.129573255	-2.342570781	-4.130751985	-1.381016656	1.42620392	1.102269108	-1.577225626	1.729890537	-0.981107256	-2.586740759	0.274450481	-0.722125653	-0.083053478	-0.441178768	-2.594516707	0.360374601	0.572339932	0.16768047	0.212411931	-0.186394493	-0.070068131	-1.159179918	1.113370777	-0.053296436	0.386554369	0.131682608	-0.078891567	-0.05845665	0.781261279	-0.5348673	0.580005228	-0.35617641	0.602909177	0.142292503	-0.242857532
11.86982442	6.309765698	-0.906856269	0.561331457	4.627172002	1.686400158	-0.108529924	-1.072631533	2.498520315	-0.833669958	-2.490657336	2.088121422	-0.432365723	-2.312920741	0.941984127	-0.805225168	2.345102173	0.475965918	-0.735087226	0.664752366	0.843163102	-0.481884688	-0.324055207	0.145826405	0.042196099	-0.792360782	-0.044432902	0.446767957	-0.063956661	0.439582622	0.853558267	-0.749714789	0.803625678	0.095734559	0.925353131	-0.126461005	1.07592859	-0.958515648	0.049704795	-0.146464359
26.31431296	-5.785194818	-0.169007616	0.039449695	-0.407486949	1.761555595	2.64925755	-1.432241779	-0.612811131	0.947624657	-0.22260297	-2.694381085	-0.705402205	-0.725340518	-1.81240604	0.627876969	0.546603911	0.815448018	-0.471439611	-1.362810641	0.042113064	-0.379502154	-0.715083425	-0.553969222	0.441951529	0.35833115	0.209867963	-0.276955468	0.494358637	-0.094566105	0.445991524	-0.381084059	0.576845499	-0.506013049	-0.005188318	-0.181906727	-0.300704338	-0.063570414	0.409291108	0.009490804
20.09270709	4.391695681	-2.521939065	-6.272221324	-5.301412387	-5.659278076	1.310764488	-0.25921468	-3.419068917	1.628834508	-1.786194769	-0.405808057	-1.683639052	-1.908053043	0.549140955	1.485418856	0.05577014	0.332387779	-0.18024399	0.797482241	1.149265646	-0.422313534	-0.105206291	-0.488335361	0.348835896	0.381928401	-0.328071429	-0.068834022	-0.37104729	-0.042368599	-0.209362059	-0.23768397	0.919563945	0.367196648	0.202564608	-0.804897274	0.001096252	0.378001293	-0.458235801	0.566128548
9.928193109	-11.09011949	-0.393013382	-5.236593619	0.360315257	2.438891964	5.698922792	3.807795467	0.263432794	-2.50237499	0.548420352	0.797007196	-2.225617181	-0.844579217	-2.535967157	1.475534878	0.563781523	-1.047648975	0.275644058	-0.00712615	-1.934969986	0.791628101	0.09394986	-0.720052262	0.535310016	-0.066599033	1.008895741	-0.160708886	-0.105814762	-0.708431568	-0.091289244	0.461169687	-0.407471552	0.244601274	-0.095075504	-0.230524452	0.174380856	0.482750822	0.230589809	-0.195367067
9.859201792	8.233090752	2.360048292	-3.269089768	-3.334311172	-2.086485359	0.591518733	-1.950925422	0.071375859	0.191283881	2.525284975	0.810936582	1.118047063	-0.055578301	0.791883688	0.751288605	-2.195443697	1.08816881	0.523334657	0.737177392	0.223158288	-0.141571916	0.865977073	-0.738987191	0.354594635	0.182161869	-0.522179784	1.098732148	-0.758438907	-0.346176567	0.239442449	-0.358455738	0.35048306	-0.078887406	0.135469616	0.261965217	-0.281453639	-0.623467384	0.486318161	0.159510578
1.868495537	8.864648618	7.293719204	3.322592903	-2.405159213	-1.118170737	0.346553154	1.488993348	-0.454486432	3.136529299	0.597837797	0.215011389	-1.611191664	-1.116048365	-0.230738333	-0.001939604	-1.021331776	-0.541807619	-0.589514076	1.822376451	-1.437661535	0.30771976	0.55412529	-1.387439233	0.44336093	0.199470912	0.997011927	-0.257875643	0.355721599	0.032720157	0.074673686	-0.354782986	0.061833133	-0.46477868	0.492482229	-0.18610391	-0.138324784	0.266098867	-0.403310407	-0.301910189
7.371494646	-8.482996054	-3.584673916	-3.972103391	1.06823646	0.328391896	3.83053794	0.86576026	-0.471488193	-1.862638098	2.011377475	1.010258485	0.030450406	-1.421559603	0.049911428	0.303303718	2.249914004	-0.926461036	0.265087876	1.300860254	0.438155216	1.574804129	-1.526492761	-0.474433245	-0.835864925	0.87873075	0.232467732	-0.649268298	0.136552684	0.519064799	-0.130531343	0.01157749	0.137354076	-0.041518028	0.564516872	0.090100205	-0.09327028	-0.401525185	0.301185869	-0.201569451
5.181363515	13.76819105	2.819192971	-0.527928476	2.545318306	-2.126398642	1.128931211	1.672232173	0.817756408	2.288229788	-0.390841823	0.75274249	0.686036411	0.258568	-1.630718966	1.467461755	0.401591303	-0.885435632	1.343316343	-0.030147703	-0.41492541	-0.47081654	-0.286442179	0.607294136	0.599802561	-0.713427568	-1.018737677	0.410972741	-0.200222996	0.318616849	0.727423771	-1.269304436	0.568930316	0.535042959	-0.328614311	-0.254407926	-0.056171553	0.20193577	0.918050487	0.150083955
22.1119505	-8.508640872	4.19237761	-0.795952501	-2.699002723	0.464268204	1.993994222	-1.029608086	-1.403106622	2.080077516	0.927380789	-2.343655114	1.882051498	-0.1423825	0.382823415	1.083665032	-1.4477128	0.122468099	0.192410783	-1.053636532	0.496822195	0.564850786	0.678682383	-1.340079864	0.136938197	0.616949935	-0.454986646	0.461173375	-0.302831758	-0.709543767	0.036362176	0.079663318	-0.513124137	0.053016447	0.523616266	-0.163250329	0.07123571	0.039592136	0.401001449	-0.2182477
17.85529458	0.353769554	3.954519835	1.969898813	2.277600357	1.373555432	-1.934370709	-3.114472191	-2.26162128	-0.037616209	-0.286387152	-0.197697692	1.49047391	-0.200659268	0.400716563	-0.026070366	1.030742237	0.205343689	0.213564924	0.104790207	-0.077643285	-0.823429957	-0.284329677	-0.595439416	-1.389239505	-0.603527728	0.671964193	0.559298244	-0.060485625	-0.156017762	0.094232186	0.119058975	0.210385123	-0.084243929	0.211764638	0.844377674	-0.113820718	-0.139050367	-0.276061369	0.547924689
25.7705186	16.36432894	-0.021497095	1.437644157	-1.768570559	0.322098336	0.35476044	-0.581260427	-1.600163971	-0.38408457	-0.543740202	0.852269055	0.481621915	-1.518804454	2.031395336	-0.014137215	2.675237169	0.280793626	-1.258070433	-0.78572381	0.78616743	0.013716844	0.951155237	0.580263497	-0.245359732	-0.315516731	-0.124892139	0.609973708	-1.020849819	0.882819894	-0.034439291	-0.391322767	0.83490767	-0.616478507	0.4172883	-0.140173292	-0.111664703	-0.33988091	-0.079947991	0.160582491
3.555725748	13.67585685	7.720234393	1.40002539	-3.53736055	0.608746552	1.976500463	-0.316283643	-2.012885939	0.450443137	-0.793306884	-0.932082852	-0.703810485	-1.498949182	-1.300376016	0.181319233	-0.398333555	-0.28370008	0.014867035	-0.439510124	-0.445650998	-0.21786756	-0.685297264	-0.457781122	1.155675454	0.570484652	0.058890167	-0.844234175	-0.193842748	0.187439441	-0.097696097	-0.431300286	0.246326475	-0.000737394	0.133528053	-0.147289092	-0.490265178	0.018951571	-0.118439826	-0.048380737
9.234117084	16.1968866	8.15272871	5.031041591	-1.461303741	0.914826452	1.662160762	1.64307938	-2.329769772	0.638979494	0.623443188	1.202757843	-0.686339336	0.401045919	1.069867623	0.953433869	0.270012874	-0.93218178	-0.117382308	1.140535862	-0.970051035	-0.305016309	-0.245642329	-0.33968703	0.549350403	-1.216775659	-0.455852647	-0.226516409	0.222075863	-0.44280714	0.120923818	0.21596637	-0.33844732	0.326438371	0.180974042	0.411726805	-0.211149834	0.04255804	-0.304294662	0.407136762
21.95720706	-14.58436697	2.975724118	3.547646431	-0.800211503	-1.515243754	0.603414872	-3.592449097	-0.960938286	-0.34037823	-0.014192353	-2.934742281	1.188434419	-0.296716494	-1.657589737	-0.886796038	-1.84285683	1.415029281	-1.085419184	-0.624375917	0.419112462	-0.244477049	0.519215214	-0.794133605	-0.020471483	0.606579073	1.011992704	0.318361302	-0.658048869	-0.694561021	-1.391244376	-0.23401172	-0.696892625	0.707099865	-0.286381492	-0.3117962	0.193560011	-0.263701647	-0.39840941	-0.313623816
25.51076523	-8.221409921	-1.337084992	-4.246684651	-1.623342935	-1.460267215	0.252984841	-2.879045812	-0.753998566	0.10673259	0.549556464	-1.712812996	-1.232493078	1.977718978	0.075676624	0.368348069	1.60659915	-0.3504084	-0.950313953	0.402514167	0.098047758	0.562333422	-0.818573517	-0.168102803	0.057848813	-0.160704735	-0.562829994	0.13544387	-0.259692752	0.343580097	-0.059740084	-0.094146893	-0.19787661	-0.220532733	-0.244752852	-0.322747109	0.143149674	-0.14665706	-0.359715426	0.068075556
2.201524985	7.43214312	5.544325795	1.209394723	1.359402947	2.38748327	-1.101482079	1.106554307	3.957709579	-0.620686285	-2.591042553	1.247068576	0.834975382	-1.161785341	-0.38833103	-0.941627304	-0.537309808	0.114114203	0.0710539	0.151092963	0.813332157	-0.11737585	-0.357683107	0.017472929	-1.160951019	-0.448616112	-0.421120602	0.16450681	-0.335695928	-0.291976122	0.092022428	0.524006732	-0.013875407	-0.100308649	-0.195169318	0.171083031	-0.294611924	-0.326704851	0.461886421	0.054867902
2.120112392	13.67310148	4.332806353	1.392149915	1.564298127	1.728893582	0.845806655	-0.053847137	1.343535229	-0.834846755	-2.614035292	-0.71821448	0.685556501	-1.87170254	0.847975867	-2.146698404	-0.077444859	0.968793725	1.053559025	0.006285457	-0.27077442	0.404803989	0.244231262	0.101395387	-1.352580786	-1.135047705	0.399322835	0.616835535	-0.326183447	-0.177302564	0.4700307	-0.049416601	-0.352169766	0.023570853	-0.02081947	-0.142850497	-0.588100465	0.088924898	0.428826388	0.392111982
21.31229588	-2.456389696	0.966845399	-0.837384942	-0.851232189	1.563829188	-0.032157783	-0.317111695	0.060977964	-0.142012954	1.837595021	0.481188173	-0.714098738	-1.32965325	-1.987660887	-1.441881928	0.963870399	0.121497452	0.029009116	-1.000472437	-1.086603506	0.009072259	0.755555602	1.192787556	0.34675162	0.747383243	-0.021424101	-0.676648794	0.164130111	-0.081449336	-0.303310086	0.191663718	0.260922504	0.184288362	-0.079559578	0.544176152	0.19890441	-0.803055111	-0.105255256	-0.167911
12.23348096	10.62392288	4.630758892	-0.839112574	3.838225229	-1.162230755	-1.337612835	-0.493805107	2.486468398	0.665177052	-2.446805681	-2.011933271	-0.108171212	3.851492268	1.023557441	-1.384658611	-1.056522903	-1.467077573	-1.307592556	-0.073592632	0.43140324	-0.397120505	-1.54821117	0.876522855	-0.441202497	-0.175703979	-0.282178787	0.106164204	-0.207937943	0.816805936	-0.006849384	-0.488455526	0.513490197	0.070775404	-0.15954849	0.177044429	-0.055885405	-0.064034508	-0.407898277	0.517818161
9.631648327	24.4795349	6.362875574	10.94229806	-0.450027074	-1.253453496	-1.394884529	-4.137880412	-4.100427057	-1.42591913	0.919389515	1.703665015	-1.106349942	0.265555267	0.774401742	0.084536616	0.725266481	-0.864281581	-0.001716701	1.314567884	-0.302331242	-1.271858967	0.708888014	0.436290354	0.080718909	-0.830927936	0.716475106	0.337200347	-0.275324797	-0.270846377	0.257804367	0.548508053	0.474403504	-0.151705872	-0.228125188	0.02173437	-0.538871703	-0.553858217	0.111941796	-0.781741071
-1.946935947	-7.224365457	3.303592293	1.191321871	3.991140922	-0.07194069	2.912236964	1.636568938	1.951072497	-1.851463791	-2.117742029	-1.849544716	0.584416678	0.25087871	2.005199466	0.339919226	0.138510579	0.003989694	-0.947694644	-0.081460233	0.21940074	-0.088526327	-0.972446185	0.323591721	0.912629792	-0.013720636	0.689400912	-0.324520485	0.341615085	-0.234025418	-0.696489864	0.548840863	0.096426261	-0.64275217	-0.018281625	-0.007305662	-0.239066475	-0.021872553	0.354471188	0.216232836
18.6876798	-10.41600067	-0.749075172	-0.110132917	0.210454897	-2.354425647	0.703121391	2.058981824	-1.142811406	-0.505102524	-1.387332207	-1.982567818	0.560566967	-0.05677163	-0.20773423	0.986048423	-0.31967868	1.455667738	0.293967862	-0.510942298	-0.626060848	-0.670990408	-0.007284111	0.111670457	0.247049207	-0.011785401	1.183684744	-0.192316938	-0.081027166	0.607865807	-0.171979235	0.128121883	-0.508975946	0.015213783	0.392412363	0.212338225	0.315253001	0.228080721	0.085879323	0.068392922
0.725112674	16.07813838	6.774727085	-0.407592077	-0.795968756	-5.350028152	1.933962684	-0.352298538	-1.115851487	-0.546476279	1.887912865	0.520403206	-2.685081766	0.432566019	0.462608336	0.583866718	0.229726698	-1.071592754	0.535046065	0.227082888	-0.08422539	0.20607072	0.938297709	0.586460964	-1.045388124	-0.072766783	-0.782300255	-0.741871671	-0.363206685	0.569322181	0.054977685	-0.067490437	-0.152737289	0.468038052	-0.321390198	-0.188936063	-0.163912454	-0.284984123	0.432597692	-0.373414527
14.11835273	-1.965839605	-2.745425132	-0.684817817	-6.551702775	-4.523457633	-0.127430483	-1.29041264	-0.290637756	1.184627198	-1.346456321	2.290487694	5.172893677	-2.703991438	-2.496242978	-0.370081978	-2.400236292	1.744989729	0.846183303	0.110227285	-1.35019258	-1.351899211	-0.421981037	-0.352286814	0.592144795	1.14404001	-0.715131595	0.259832885	0.327883978	0.996726461	0.708266656	0.060922907	-0.103841525	0.068774177	-0.914291323	-0.2340452	1.037903683	-0.599632158	0.713673779	-0.208059804
11.39034559	-5.465366714	1.733231257	-8.548408159	-1.776353278	0.263695982	-0.775871894	-1.588824743	-0.745161151	2.140377718	2.849922771	0.354042101	2.205706102	0.216202825	0.72018472	-0.33714154	-1.545511236	0.077236724	0.045788611	-0.659225471	-0.184334108	-0.60440577	0.359870095	0.382877126	-0.74797165	0.209503167	-0.103712641	0.618121524	0.350281434	-0.815766504	-0.306585078	-0.063729635	-0.126892628	-0.262312878	-0.322439903	-0.113646185	0.119318894	0.055845243	-0.499006813	0.054827005
22.24914642	-8.742740007	-0.539522141	-1.955744288	0.053321	1.238590918	0.778671185	-2.890378994	-0.147575397	2.799773552	1.907827584	-1.280578457	-0.726617517	1.919978662	-0.399863847	-1.232258898	-1.021498909	1.507036958	-0.784059506	0.671181982	0.832195062	-0.439270056	-2.21160273	0.411923612	-1.422779544	-0.496919429	-0.105833852	-0.438352788	0.736669099	0.084581882	0.220613423	0.222073622	-0.149429931	0.807560456	-0.082863482	0.179148851	0.073921431	-0.30950631	0.140787612	0.222492679
30.7558369	-9.116428613	-1.317222396	-0.550436666	0.508916381	0.303038091	1.119933268	-1.40096632	-3.350827107	-2.706095549	0.239917195	-0.290256901	-0.371140037	-0.472926174	-1.206477575	0.310154541	0.903306908	-0.223934859	-1.124140554	-0.250678546	-0.808518154	0.248187389	1.839179956	-0.577097611	-0.182236799	1.252818633	0.131471545	0.578953413	-0.46774846	-0.964907933	0.033514343	0.691796647	-0.871174072	0.283777112	-0.0132326	0.239302715	-0.64508795	-0.204851543	0.094569149	0.174778767
29.18707502	-0.751645523	1.693211873	1.041110642	-3.542996929	-2.276174019	1.916084031	0.456738556	0.547163531	2.459274026	-0.88380855	-2.418854577	-0.850505486	-2.096880332	-2.45916344	-0.417977131	-0.996207503	0.880420467	0.28207986	1.330268505	0.008389607	0.241037029	-0.700851502	0.552532858	0.187066637	-0.059388529	0.276612804	0.764585248	-0.766276288	-0.358585551	1.085207097	-0.420326752	0.179037758	0.346366198	0.220183643	0.276459734	-0.609997367	0.426478807	0.018162464	-0.417114427
4.526467565	17.596714	8.029010304	1.310756781	1.340497065	-1.93914035	-0.417125713	-0.879806962	1.272914313	-1.906083822	1.271658167	-0.238031403	-2.182483262	-0.427696777	0.811969756	1.068262214	1.219412267	1.164207958	-0.174296428	0.900071378	0.711631375	-0.574714988	1.044977747	-0.40308392	0.634114147	-0.378505463	-0.135780445	0.538163589	-0.67959039	-0.704828695	0.47539713	0.923509526	0.687748205	0.252219052	0.041631028	0.295260121	0.256290211	0.016023902	-0.213167415	0.359680681
26.7792434	-5.493747369	0.23356851	-0.589817724	-0.227704621	-0.287671419	-0.016195762	-2.34567647	0.790981394	1.778390285	0.544724469	-0.593589922	0.306709978	-0.205312321	0.691794857	1.235450329	0.055813023	-1.076870981	-0.179731626	-0.859807234	0.482642006	-0.457700456	0.350960953	-1.26554054	0.185989486	0.356828764	-0.047560115	0.151786432	-0.265698186	0.538716692	0.390765872	0.234733877	-0.457392097	-0.382978815	-0.127674239	-0.492108525	0.070662817	0.081483204	-0.152967157	0.082936818
21.50236321	-12.3536797	-1.244769637	-1.280474191	7.103328158	6.080001866	-3.81478964	-6.076165431	0.59266852	-3.832653587	3.131191326	1.31841529	-3.467866658	3.780249766	1.599184105	-3.431219347	3.294833948	-0.908014539	-1.256438339	1.586840514	0.264760756	0.866510029	-2.471781353	-0.194172226	0.916535662	-0.123068827	-1.214483712	-0.418670721	1.502100125	-0.455200003	0.559960616	-0.853363241	0.01109671	-0.738805239	1.294747931	-1.160263208	0.831356461	-0.837254887	0.070081262	0.770632319
19.69106215	22.11511773	-3.067401202	1.18525131	-6.172799147	-3.642921906	0.979223941	1.760243361	-2.499570128	0.394018099	-0.83678304	0.813832776	0.721569756	-0.782017203	1.268554844	0.683441207	-0.230244084	-1.009679211	-0.145375457	0.628773967	-0.825723078	-1.270454142	-0.824093171	0.082610323	0.139648106	-1.122818433	1.503751844	2.246463482	-0.276251382	-0.773517135	-0.166998884	0.312106219	0.430314411	-0.610786945	-0.768977284	-0.170260526	0.159975386	0.320389636	-0.79752392	0.401913099
7.708957684	19.15886244	6.01519438	7.848290685	-0.342713204	-0.315595011	2.362587497	0.369523872	1.877000262	-1.95015536	0.472533967	0.961740847	-1.215560874	1.884486439	-0.915182354	0.010680746	1.509473819	-2.311193334	0.651855544	-0.479062462	-0.185178477	0.528526396	-0.499266178	-1.05901163	0.264466224	0.784676709	-1.109494661	-0.168012584	-0.134205035	0.272800245	-1.196457514	-0.125402022	-0.576212947	0.275802592	0.205005907	0.284516036	-0.316741082	0.146015026	-0.283464436	-0.02447727
22.20019806	3.737219139	4.640193878	2.748176308	3.185702404	4.124648139	0.291199666	-2.486177181	-0.537094191	1.462144907	-1.078450007	-0.763011013	-0.074143919	-0.522047289	0.528781454	0.079993181	0.329606322	0.027184419	-0.584113901	-0.466174488	0.603967832	-0.344001513	0.034016306	1.027250083	-0.16963605	-0.479671525	-0.569963786	0.799761304	0.371118261	-0.041001109	-0.792851987	-0.166665464	0.204398247	0.050593349	0.159826118	-0.102263808	-0.040681879	0.047697787	-0.426574257	-0.341703004
26.64042379	1.971007292	4.096231695	5.30911297	-1.794694282	-1.111139792	0.511210558	-1.876754822	-1.406325781	1.384602878	4.440986172	-0.235153765	0.723035582	1.64700472	-2.550900317	1.164746602	-0.301240929	-0.799599003	0.047683491	-1.699644166	-0.595750587	1.256260276	2.03237589	-0.997941585	-0.154955334	-1.197171246	0.139047665	0.837621665	0.895110457	-0.12040667	-0.884091987	0.033000871	-0.210663945	-0.398290259	-0.356521468	0.299927616	0.331623423	-0.416317301	-0.045681149	-0.172451432
4.288502792	23.72020465	5.816306325	13.3352546	-2.240542504	-2.071963988	1.697984737	-1.953488567	-2.722110879	0.739127331	0.949861152	0.692685779	-0.766826374	-0.396428721	0.59748289	0.66513995	-0.838089609	-1.531007246	0.691418491	0.857808425	0.514677331	1.274040827	-1.164255604	-0.8364121	0.658234279	-0.691909877	-0.135089259	-0.579925359	1.099671425	0.262590179	-0.744519275	-0.094224274	-0.605436163	-0.470746167	-0.440020234	-0.318657055	0.322111932	0.172278694	0.07250911	0.29494694
17.38796744	24.64069165	0.017599685	4.975815185	-2.271286016	1.646971541	1.316030834	-1.041235409	-1.736928935	-2.285719032	-2.060218678	2.48137356	2.4539393	1.103051854	0.546332237	1.00825119	0.495207299	-0.929504406	0.890661628	0.712445148	-1.107728778	-0.571701052	0.264792125	1.085117142	-1.168002393	0.141611778	0.38823119	0.390419682	-0.876059613	0.201514208	0.586119887	-0.230430892	0.626439853	-0.204231573	-0.258574912	0.184965097	0.17851597	-0.113612053	0.049343762	-0.444227124
20.64113141	2.315581482	2.897230334	2.029563844	-5.071331475	-2.407655136	-1.908344185	-2.588538954	-2.474035538	3.33174672	2.535386055	2.336279961	0.288232853	-1.983444848	-0.3261095	-1.41790683	-0.505642842	0.658202249	0.43552928	1.870920212	0.044350403	0.069265109	-1.039738255	0.79852671	-0.239473543	0.170681541	-0.641101932	-0.28950064	-0.38652824	0.480438781	0.048565547	-0.338639425	-0.51333735	0.551804206	0.593225923	-0.58148604	0.330644665	-0.545056363	0.111738909	0.017156336
12.20237441	13.00143485	4.240694171	3.100026571	1.280790243	0.165173521	-2.728109434	-0.076530313	3.452587682	-0.18373782	-2.932471532	0.114621511	0.693701032	-1.96226412	-1.363417628	0.140261444	-1.25163721	0.239371029	0.443917556	-0.451828611	-0.506195605	-1.005576434	-0.170500049	0.964375722	-0.218077154	-1.124059312	-0.443263874	-0.616001589	-0.361562003	-0.094638461	-0.539377064	-0.532515351	-0.514034576	-0.159147639	-0.430758681	0.006751661	-0.099371955	0.18212687	0.228195549	0.198129593
22.10417202	21.96522344	1.681656381	3.623600131	-5.345036626	-3.762726101	-1.250040061	0.216620603	-1.438686663	-1.221479598	-1.589312576	-0.06982857	1.56905974	-1.752036658	0.852811891	0.589211775	-0.853548454	-0.743805322	-0.268805386	1.104066381	-0.032798382	-0.980800851	-1.34676633	2.124712066	0.768327064	-0.436380355	0.356443117	0.581500826	-1.686974071	0.183178554	0.622845307	-0.938936862	-0.005927984	0.183946674	0.098794596	-0.422886908	0.57559924	-0.86449492	-0.020832377	-0.110117203
11.63803079	7.664113712	-1.275647136	-2.877462776	-0.451323721	0.778763902	1.596167478	-0.822786091	2.001810046	-0.939887504	-0.079386554	-0.366032132	-0.101316697	0.414785429	-0.471630928	-0.723617762	-0.326716718	0.591163095	0.988440806	-1.106640305	0.97899814	0.313051074	0.759323974	0.300798869	-0.234205788	0.074632249	-0.217459265	1.064376878	0.329601027	-0.157141542	-0.485423577	-0.249629999	0.327993754	0.487553663	0.258250101	0.247792422	-0.679821554	-0.026867613	-0.351990667	-0.245572682
29.33550301	28.27781041	3.06757936	9.519165089	-2.430575353	0.579673658	0.347516561	0.005698318	-3.762473806	-1.361211884	-3.840019111	0.765793603	2.24732934	-2.075806981	1.217721366	-0.089739737	0.010150787	0.963342266	-0.832644807	-1.085456479	-0.409248795	0.030374248	-1.16882839	1.481471151	-0.651142468	-0.617963007	0.551476996	0.626306372	-1.182956122	0.006867653	0.318508029	-0.052687503	-0.077578854	-0.307583205	0.749315102	0.226952052	-0.42162591	0.553475221	-0.508742903	0.475073849
11.17607621	1.995652122	3.904514748	0.858951917	0.151005997	-1.244112308	1.478350304	0.966563367	0.383628978	-2.483960102	-1.106821021	0.449775411	1.992277518	-0.641232257	-2.07580323	0.384555687	-0.381819148	0.327663408	-1.083012565	-0.287943671	1.518596545	-0.417498008	-0.126403437	-0.174125955	0.788093266	-0.65616815	1.227033398	-0.530313437	0.010693186	0.435824675	-0.029205003	0.659934241	0.545780208	-0.539867946	0.201634084	-0.05112741	-0.696916399	-0.086405845	-0.318610354	0.15282968
17.18190518	7.217525703	7.416980776	9.422487649	-3.297555553	-1.465059081	-1.355549906	-3.851088957	-3.955530047	1.324779091	2.425366842	1.664353399	0.098199755	1.107902395	0.38056399	0.712312436	-0.713917509	-0.774060946	1.127692075	0.735169821	0.41078987	0.832945547	0.907991858	-1.616269953	-0.292563931	0.505522658	-0.419611987	-0.521996018	0.105923625	-0.112016055	0.834298677	0.26592746	0.039864017	0.135968721	0.049833064	0.855460724	-0.063020107	-0.261956867	0.571009541	0.313280922
19.68381679	-2.736791652	3.214430983	-0.209444459	-4.473823587	2.926954546	1.443620369	-1.161997214	-3.155648888	2.437764646	2.173540202	-0.18946977	-0.746442086	-0.034887932	-0.649807962	0.661084943	-0.271046496	-0.996239218	-0.501219505	0.61488807	-0.238499882	0.552109095	-0.603279658	0.318757231	-0.39754961	-0.628851395	0.12405553	0.023688715	0.450205874	0.039733726	0.134186445	0.121696242	0.380815136	0.322189328	-1.232467285	-0.526450315	0.017430566	0.146347909	0.275811032	-0.02754088
11.85387468	0.17311468	-2.610068851	-2.422376872	-1.923748247	-1.289467003	0.005745131	-1.096499935	2.901736739	0.524673291	0.237196758	1.118680088	0.447531604	-2.37414562	-2.157407193	0.927504603	-0.98132431	0.967467309	1.625695759	-0.110194858	0.759723562	-1.211371851	-0.102311569	-0.792414717	0.582592343	0.493833224	0.569504037	0.039448063	-0.349822072	-0.465779195	-0.382238515	-0.079838607	0.538522983	0.279904157	-0.052684371	-0.270001695	0.073167149	-0.000548335	0.631957156	-0.453036656
19.58384065	9.017780991	0.791979458	-2.276509102	-4.441790541	-0.18759646	-0.872649542	-0.758714495	1.763111221	0.530384303	-1.49640572	-0.453889135	-2.815293661	0.129013978	0.237572565	0.552798344	2.201568555	0.008605413	0.523645203	0.413624439	0.004088925	-1.137115803	0.470336767	0.244850989	0.120477599	0.302941481	-1.384141364	0.033069029	-0.688340909	0.23881502	-0.119443353	0.371902368	-0.040100856	0.632499745	0.165514449	0.173277549	-0.034507565	-0.324863771	-0.319371288	0.022072084
29.39198192	-0.268885655	-4.793400003	0.749405571	-1.900643289	2.311078693	-0.898650978	-0.487167921	-3.10590106	0.274174872	1.991232243	-0.245259163	1.935710289	-1.861396655	-1.422445073	0.030650012	-0.939180594	-1.900027385	-1.738510015	-1.43677835	2.02317209	0.992133403	-0.19595223	-0.19214347	-0.463682168	-0.571206562	-0.16003086	0.766139753	-0.444931963	0.144454084	-0.204291661	-0.325386367	0.768192737	0.018356043	-0.229534324	0.998332978	-0.016696149	-0.788675004	0.005224991	-0.351699558
27.39411641	3.001143572	-1.990713293	-1.488951609	-4.08945975	-1.922980065	-1.07246519	1.004306106	-1.59529442	-1.24595244	0.855384949	1.266246227	1.512584526	-1.149166059	-0.279107287	0.115926542	-0.942250709	0.284809717	0.101587387	-1.342844385	-0.292589667	0.09464297	1.309818283	0.828828689	-0.46288059	0.258189423	0.223333767	-0.178655507	-0.582469065	0.751767845	-0.442693799	0.003280544	-0.532692041	0.546945418	-0.37860778	-0.073245828	1.722752496	-0.168990432	-0.072217362	-0.627278901
0.933930431	-3.451492308	0.66849155	-3.010179772	-0.820111085	1.187610968	-0.590005482	0.394926649	1.170453308	-0.216616326	-1.43022128	2.855465745	-0.524157174	-1.617756326	-0.416528214	0.097901714	0.153656363	0.7565882	-1.090456708	-0.754231946	-0.379980333	-0.339429736	-0.112704412	-0.235808001	0.089803485	0.061783867	-0.641860138	-1.27508586	0.038352741	0.217120003	0.47519594	-0.412766358	-0.690523902	0.086789049	-0.434508937	0.084416783	0.170638405	0.093147787	0.054437896	-0.158882736
23.51104676	-0.503031295	0.765924923	1.627401858	3.16412834	1.528435259	-3.005551918	-3.389379793	0.461547724	-1.481847927	-0.734297046	-0.04829778	0.528528539	0.023072387	0.141346376	-0.682059259	1.552104862	-0.265826292	-0.814064565	-0.005405903	2.60259146	-0.125380166	-0.304629799	0.196020206	1.205254499	-0.476455224	-0.46227657	0.803128879	-0.156292394	0.165035181	0.674804051	-0.415239345	-0.119751455	-0.320433844	0.952331684	-0.360454381	-0.006760149	0.458641115	-0.598487627	-0.292818682
15.04498929	3.632958733	2.415281878	0.785189387	-0.993349464	0.456146317	0.492014723	-1.327295535	0.349585653	-1.0000342	-2.02174157	1.010252964	0.6805266	0.917699459	0.553712859	-1.056745843	0.051895124	0.085900267	-1.217156776	-0.661758312	1.447011289	-0.602221643	0.472157284	0.371085184	0.025641574	-0.242502092	0.382176357	-0.438193422	0.05442915	0.350709684	-0.398655795	0.063174821	0.200559585	0.386934029	0.021285387	0.13607514	0.288740903	0.118955697	-0.198107922	-0.0685167
27.64309139	-18.364605	-3.96225296	-9.077278789	2.579289653	2.412277884	0.526460395	-2.859547871	0.765273891	0.265491601	4.960192744	-1.566289354	-0.556176462	3.32880224	-3.525275944	-3.121516922	1.675494779	3.001619969	-0.661431408	3.222344408	-2.542672895	3.082947286	-5.673969952	1.163460172	-0.603295327	-0.612968139	0.974925454	-0.827910452	0.72039098	-1.217702812	-0.444158126	-0.398191123	0.440776518	0.728788422	0.484474091	-0.983253596	0.918433582	-0.763264674	-0.447239143	0.307498478
17.56193369	8.05766327	7.82593367	2.394606281	0.14593878	0.657954714	2.509652981	1.014252265	-1.169617749	-0.440298635	-0.500164799	0.063738063	1.779753092	-0.037441736	-0.643277958	1.609996877	-0.230577404	-0.82699626	0.441741868	0.465353168	0.957776321	-0.289043407	-0.456449291	0.287330756	1.433295325	-0.898607607	0.218672535	-0.086689542	-0.667660415	-0.370478207	0.72502434	-0.980793372	0.568599952	-0.887347042	0.31658659	-0.762903651	0.418055807	-0.186856204	0.335321421	-0.351009791
7.364777001	-4.607298711	-0.875760358	-0.433873118	1.207395857	1.873103475	0.99582956	0.774773184	3.630805576	-0.188671358	-1.628826943	-0.381644255	-0.630593738	0.251204561	-0.665163576	1.418858924	0.805897677	0.533108645	-0.118631717	-0.697216894	-1.237350142	-0.910060995	-0.760285977	0.816573632	-0.351967807	-0.409117934	0.506454467	-0.292327384	-0.529819946	0.133793927	0.647529221	0.641248793	-0.894072603	0.13302014	0.690022425	0.751455748	0.229871863	-0.112703724	-0.058820499	-0.057383106
3.031992144	20.58381412	5.202203202	2.379347697	3.345389261	2.745915349	1.463041008	0.096941915	-0.694898038	-0.314342754	2.137450548	1.039791523	-0.189171135	1.7712335	0.119921656	1.042201362	-1.247313243	-0.546753737	-1.105708339	-0.174979226	-1.41469375	-0.43228909	1.237210358	1.353502248	1.321801033	0.641489477	-0.46169002	0.124731409	-0.285764601	-0.692084643	-0.246497312	-0.560949497	-0.015635308	-0.337901829	-0.023379129	-0.101964917	-0.119637571	-0.048971628	-0.34742793	-0.208223691
-5.579751816	25.96035613	-2.797133098	2.966816637	-3.501480527	0.290190111	0.865859113	2.408355565	2.711513115	-1.00950487	1.816661654	0.368277026	1.617997577	2.023879733	-1.126385088	-0.731483928	-0.160999965	0.94014392	-1.392962833	-1.955603376	-0.019462414	0.089056128	-0.662201838	0.061900156	-2.074273775	0.873693068	0.444479277	0.487204511	-0.402634441	0.247956193	0.60271393	0.366789352	-0.173386563	-0.458851492	-0.014709324	-0.409816938	-0.01861541	-0.290655422	0.530156229	-0.616181529
4.885650597	10.90663692	-4.13579675	-1.664943644	3.11948005	1.788214533	-0.154159661	-2.176030521	2.278723455	-2.679055927	0.060375305	1.833781417	-0.855681267	-1.083458069	0.090835912	-2.161855363	0.369398248	-0.213950046	-0.326544395	-0.94414334	0.178270698	-2.01236208	0.957170923	1.208472489	0.724457984	0.931577439	-0.628654825	0.560224247	0.187844173	-1.265107878	0.181101091	-0.598144174	0.904993939	-0.490150895	0.339247377	-0.319888961	-0.236772049	0.424966398	-0.024669745	-0.392664131
-1.587053926	21.35369457	-1.315738782	1.0594014	1.769556767	0.667637741	0.538566784	-0.714490811	-0.30883818	-2.389096518	1.723019304	-0.238099503	-0.88391624	-1.468124503	-1.928331286	-0.365312343	-1.633380269	1.023491028	-1.172145122	1.349082244	0.214525697	0.329575638	0.188605546	-0.84925007	-0.015411519	0.202759501	-0.415198592	0.61148943	0.116232979	0.380338739	0.006950007	0.09025746	0.24059961	-0.38780717	0.105587527	0.206203231	-0.423708298	0.416202408	0.050102076	0.464835706
28.12953816	3.219771626	-0.07959503	1.780109248	-0.856832864	0.280867611	-0.800413591	-2.115050912	-0.047320382	0.969159563	-0.664662881	-0.201834083	-1.339643621	-1.805289838	-0.519445723	0.079906771	-0.403356724	0.090669641	-0.574745145	-0.171330596	0.044917107	-0.331159503	0.654531405	0.100671581	-0.973071404	-0.117446179	0.000712752	0.555562464	-0.385961814	0.67957589	-0.898528006	-0.191565251	0.156173418	0.37044307	0.261817604	0.002504931	0.577186178	-0.523225165	0.036544343	-0.28597913
-1.484854094	29.15824224	-5.320291201	4.370470456	-0.304309629	0.539811801	0.786827767	0.14809883	1.421281461	-1.136810611	4.00126607	-0.004529839	0.839395322	-0.952017273	-0.1898986	0.531842886	-1.738426161	-0.006065545	0.477593217	2.389344568	-0.751615243	-1.118583466	0.411316608	-0.252155267	-0.216318915	-1.417617307	-0.197260022	-0.558688427	-0.404311155	-0.372279111	-0.261048046	0.867448847	-0.053595576	0.318023942	0.774713938	-0.041011913	0.273022792	0.501445347	-0.255407333	-0.231935995
1.320158923	52.01446615	-17.35158134	14.74440884	-1.180126206	-4.35109619	-7.457876121	3.084183036	0.251753721	-2.663602673	3.767766972	-0.266358438	1.699407352	-0.611446841	0.159406173	-0.213478703	-1.413156228	-0.24177517	-1.689304945	2.947177045	-1.665088329	-0.022833396	0.290305895	-0.775766555	0.434955436	-0.031999382	0.533401305	-0.176000043	-0.307398344	-0.611383613	0.505707739	0.912779909	-0.523984191	0.148727265	0.537189136	-0.274071133	-0.129120315	0.18012663	0.0173135	0.187106203
-3.90999496	30.34248056	-3.756871298	-2.829520072	-0.724852168	2.769867054	3.08360444	2.483710283	0.347061138	-4.01246341	5.09418182	-2.622603691	1.42205432	-0.270037722	-0.590298704	0.218181345	0.357240809	1.034547982	-1.01915957	0.13176296	1.314973984	-0.328786718	-0.768799702	-1.65314064	0.296053868	-0.057841138	0.380101233	-0.459664581	0.184703365	1.226041325	0.067267487	-0.386941949	0.653542448	-0.094527046	-0.429335383	0.152626926	-0.387169513	-0.345378502	0.216341288	0.417888926
2.349946374	1.263137735	5.861651649	-7.074919732	2.008839806	3.250919131	-0.281295961	-0.480567265	2.300122856	-0.698744333	-1.522166476	-0.130846929	-0.071238708	0.771772806	1.202532977	1.481893171	-0.578187742	0.033666677	0.325498144	1.229665013	-0.104077266	0.294192456	-0.507084969	-0.304648605	-0.053508443	-1.078758861	0.775023825	0.283351846	-0.472520046	0.060177655	-0.412118719	-0.471536772	0.125529586	0.342833964	0.243020952	-0.592168515	-0.574817461	0.370877427	0.122460577	0.358423141
6.615155574	25.68526409	3.217332389	6.148248005	-2.654283026	-1.009443688	1.22480479	2.568728494	-2.369895226	-1.003252333	0.060462362	-0.250687793	-0.25800466	-0.885827436	3.209675891	-0.010796058	-1.408485894	0.856129191	-1.355534407	1.776854214	-1.454457844	0.160085245	-0.345835247	0.061422558	-0.228559495	0.504966857	0.92454746	1.713938925	0.338974247	-0.543907127	0.456612302	0.626445079	0.253714329	0.022646685	0.278820731	0.119788534	0.244220461	-0.24444768	-0.107185353	-0.809345526
7.031300567	3.644330073	4.094781954	5.348276684	-1.607716272	0.707308348	3.289746801	-0.722281025	-1.776390615	0.29600863	-1.825639741	-1.117903386	2.941492395	-0.398493222	0.268660239	-0.716042038	-1.9404982	0.900054825	-0.596313606	0.382319324	-0.500972448	-0.826138976	-0.985673594	-1.400029866	0.753572036	0.811554764	-0.391457366	0.454511	0.942356081	-0.131608673	-0.14036822	-0.035438314	0.505756958	-0.049293293	-0.561852536	0.181680393	-0.152293984	-0.261345971	-0.251944423	0.629248091
2.52491977	8.990164194	-1.380808139	-3.041288265	-0.265797023	-1.382434319	4.53950632	1.139466274	-0.984736766	2.222303871	1.964488489	0.218452056	0.087521608	-1.321212579	0.967442718	-0.222519947	-0.391608587	-0.264395276	-0.185125177	0.064180031	-1.496989798	0.830289721	0.149618901	-0.451435713	1.088630174	0.056337325	-0.323498932	-0.473286361	-0.724860418	0.474153848	0.451654606	-0.717841431	0.857966513	0.534127634	0.317516833	0.234617905	0.649788628	0.044896067	0.220312681	0.069840282
12.10782469	5.486925435	-5.365499387	-4.255655484	-1.945505984	-2.354515386	1.113117181	-0.274888716	1.59488531	1.216121061	-0.47413534	0.769541671	0.095830132	0.523339695	0.616541089	0.882431119	-1.146794357	1.295174499	0.173916378	-0.485644436	0.947431196	-1.556066126	-1.175181231	-0.841718934	1.201487398	1.389514966	-0.971097413	0.206732905	0.316815083	0.458441793	-0.791726708	-0.746288078	0.557234562	-0.299076278	-0.558891104	0.052412673	-0.322052691	0.503835043	0.166823487	0.0432134
0.074867057	16.08248024	0.508304771	-4.298604503	2.715635509	0.669390952	-1.291486092	-0.216111663	-0.22396293	-1.101649683	-0.283231398	-0.043233401	2.289623519	-0.093595353	-0.58898211	0.384997943	0.940489859	-0.347026159	1.151746922	0.114731089	1.472275255	0.389582463	-1.355051503	-0.34424896	-0.595429571	0.129728301	-0.891974716	0.153757971	-1.368724305	0.087320747	-0.104741686	-0.490759421	-0.027982442	-0.718979759	-0.572969453	-0.152198434	-0.184384002	0.080797653	-0.366826241	-0.201327771
2.605184565	22.88405153	0.81886095	0.146952341	1.499628372	2.939749262	-2.868829762	-0.060058599	-0.909871094	-0.94141706	-2.202703951	-1.906331324	1.619704135	-0.28796522	-0.358815594	1.221760711	-0.884823705	-1.021494791	-1.271621864	1.181058225	-0.159553667	-0.171815325	-0.932414374	-0.183013565	-0.852356246	-1.119465872	-0.459550998	0.040651137	0.541108439	0.067957151	-0.0985893	-0.13992924	0.563789545	-0.005862437	-0.116616575	0.181782707	0.250042674	0.084386698	0.056218674	-0.355691575
2.930977866	14.46609577	5.721473135	-0.417035634	-4.002299291	-1.678276701	-0.121345784	4.29178383	3.171238521	-1.074447454	-0.986481769	-2.030903178	-0.170710439	0.38708597	-1.600029694	-1.351469137	1.249797887	-0.649525927	0.016997753	1.047157183	-0.68356615	1.008471915	-0.024721023	-0.075039552	0.224171644	-0.554463521	0.620283838	-0.627893226	-0.836360171	-0.174419178	-1.257143831	-0.438602712	-0.750116309	-0.475221775	-0.278218343	-0.690298094	-0.534661925	-0.221653433	-0.146127524	-0.100821881
10.18309983	19.93807776	-0.265717838	1.093219709	-2.524617688	-2.471248809	-0.017156792	-0.511651141	-0.965829712	0.274245141	0.437408815	0.498159082	-1.446503173	0.117398486	-0.098234085	-1.67048438	0.949106211	0.281626569	-0.892051789	0.048540405	1.403995472	-0.035255811	0.1322441	-0.515804762	0.676712688	-0.335141113	-0.019920175	-0.627280459	-0.144548754	0.626083664	0.532158895	-0.359751237	-0.188613559	-0.392117134	-0.848732434	-0.187420466	0.394238434	-0.084996074	-0.103741845	0.104747033
10.39522646	19.64118956	2.694661149	2.513087551	-3.187628448	-1.153019513	0.428685751	-0.828252702	1.42998227	1.804477973	1.734685043	1.644251547	-0.299503771	1.331340318	0.675991448	-0.401911748	1.02112949	-0.029717258	-0.740583637	-0.245434904	0.543891206	-1.457530255	-0.602027764	0.093700724	0.26598272	0.98062511	-0.980542676	-0.189825747	0.540431793	0.086308139	0.014728978	-0.512802278	-0.20918805	-0.186070864	-0.419438483	0.122237153	0.594671544	-0.615696789	-0.636767652	0.382675081
4.18786284	2.455338329	9.922074979	1.210854392	-3.3565927	0.545983166	-0.657131877	4.178279259	-0.095709996	1.08994455	-0.855211646	-0.294385158	0.380761389	-0.028634079	1.385251709	0.17758241	-3.028633331	0.154051287	0.508803046	0.388897544	-0.921311822	0.377554996	0.023862593	-0.48924609	-0.049403866	0.204639474	0.072044241	0.494584896	0.062570376	-0.378782229	0.258526011	-0.762568997	-0.573012226	0.104189994	0.104197786	-0.278776276	0.548897456	-0.529374386	-0.068353633	0.084386156
6.922515366	8.427568721	8.017085652	-1.907081209	-0.818475267	-1.031463892	3.466429563	0.0766272	-0.513298487	-1.392241014	-1.644465505	0.397754583	-0.196034174	-0.841335543	0.771041408	-0.573898733	-0.761676649	-0.727014403	-0.951892301	0.118444822	-1.343176863	-0.205293842	-0.168025068	-0.060781182	-1.416919667	-1.085654951	0.416821558	-0.599857832	-0.611917392	0.225145106	0.069267069	0.017384894	0.170770729	-0.269467131	0.377711823	0.493504137	-0.045272448	0.348392075	-0.051551424	-0.106185235
-0.865801625	11.85284937	-2.762524737	-3.493393323	2.636131997	2.462717523	0.52222548	-3.156358203	0.802820071	0.569569821	-1.914546477	1.300851236	1.352690543	0.62867681	1.051349795	-0.130081451	-0.60030649	-0.442354625	0.796193495	-2.171717243	-0.497525547	-0.504721713	-0.362206417	1.089609036	0.096928738	0.298231068	-0.447184075	-0.321894241	-0.530316994	-0.381994396	-0.2740534	-0.137661388	0.118861887	0.354204439	0.118762898	-0.112053271	0.488939233	0.199542429	0.219481511	-0.341690345
-7.456093206	36.35326352	-12.89558459	-5.579997887	4.734774408	4.351199917	3.717757841	1.110162628	-5.950053403	-2.083577554	5.096458412	-3.094364567	2.460650022	2.705946994	-0.403251523	0.206488189	-0.490163798	0.865314179	2.120285663	0.405016523	-0.237376014	-0.604186257	0.015976229	-1.310649973	0.177292729	2.089810919	0.308676058	-1.090116331	0.080051287	1.633716599	-0.45769666	-0.374660164	-0.297835315	-0.207945254	0.002871195	0.224575655	0.533381775	-0.626246495	-0.440584789	-0.321596817
-6.027363084	17.86308567	8.684447648	0.961121068	1.976626262	3.507499246	0.923795045	-0.713922965	0.386446828	-0.164022798	0.993156351	-0.476584905	-0.306374298	1.801073259	-0.93558864	1.216148821	-0.912427981	-0.755335821	1.004415497	-1.457825601	-0.602261597	0.560347186	-1.269901558	0.035375386	0.997353395	0.735506224	-0.768967635	-0.529018834	-0.45080373	-0.186442283	-0.404857514	0.838531924	-0.429223073	-0.127490934	-0.468762007	-0.083213464	-0.148259405	-0.387307704	0.253161375	0.314088461
-0.211077511	19.49311279	2.365637239	1.471349516	-0.290699636	1.408431331	2.834542555	-0.112069323	-1.311950063	1.022685611	2.464133658	0.404853336	0.883217679	0.004466496	2.081966571	1.454291341	-2.108021531	0.294689815	0.032431433	1.246640937	-1.21554825	-0.305559654	-0.876485503	-0.143095053	-0.63018982	-0.541242541	-1.073438692	0.988605318	0.540402601	-0.443923915	0.120420092	-0.30361031	0.326014705	-0.548755977	0.108927388	0.455727031	-0.729072842	0.211735811	0.193750632	0.204110796
14.34877491	13.0787568	4.627039239	5.89503021	1.845535241	0.018350257	0.981485196	-0.667722593	0.152195717	-0.882157223	-2.04791045	1.703467356	-1.233345464	-1.142318955	1.290616133	-1.594768853	-0.339314185	0.587484851	-0.680450117	-0.245817889	0.06208014	-1.000734614	-0.127290845	-0.316356349	-0.854975503	-0.244945935	-0.134840559	-0.466944246	0.054445644	0.143567075	0.234499545	0.119222765	-0.487192203	-0.028587544	0.133191019	-1.048755186	-0.601634816	0.279341651	0.242798118	-0.109570181
34.37531959	14.16600881	-3.354471184	0.933910779	-8.232166257	-4.837035247	-0.344073074	0.434242771	-2.963488679	2.020296075	-0.902515039	1.562665162	1.331721216	-0.408544883	0.689361248	-0.641921505	-0.570947987	1.048040978	-0.127328971	0.571703962	1.753154799	-1.075605905	-0.309469545	-0.187538187	-0.803314443	0.324808973	0.444528832	0.66756477	-1.229032332	0.280092058	-0.80799478	-0.092081048	-0.409657454	-0.160565678	-0.330176208	0.464767185	0.509268361	-0.351245616	0.714113601	-1.081223195
5.402630422	7.230777874	2.486991003	1.991776291	1.131798313	0.483447842	-0.61422202	-0.680476182	3.772479476	-0.428509503	-0.767332889	0.93006923	-1.315207261	0.144158578	-0.056239091	-1.021105211	-2.073204117	0.949109123	-0.194710826	0.199540506	0.041810404	0.012549967	0.883922522	0.159840283	0.446982315	-0.345001047	-0.597003383	0.5206813	0.510472566	-0.62239197	-0.501003714	-0.155052538	-0.195504235	-0.71915991	0.47359843	0.307384532	-0.157025769	-0.107005157	-0.372160485	0.198621796
11.85380463	-3.114295302	7.097070808	-3.330278872	-0.698230768	-1.729661409	3.63523652	-0.371836622	-0.407037994	0.748467319	1.588828086	-2.122961855	1.154669009	-0.509318052	-0.765265114	1.189159007	0.828119689	-0.335844814	-0.119714889	0.100046848	-0.158668947	0.413184007	-1.087665775	-0.625031358	-0.072136302	-0.598164088	-0.353620759	-0.077262504	0.711348746	-0.25424601	0.051976693	0.114883453	0.154485216	-0.238157008	0.423074451	-0.094755296	-0.160775887	-0.178059521	0.600296325	-0.059533861
32.86113695	-1.943339263	0.785244896	-0.716746664	-3.171579938	-2.090571168	-0.486857816	-2.080062169	-3.853984358	-0.683203334	1.391974333	0.427542701	-0.22076956	-1.287933531	-1.701162525	1.859571489	-1.667113598	-1.693496607	-0.21314954	0.020246703	-1.542824862	1.109748972	-0.728132712	1.073317044	-0.031685039	-1.441517412	-0.117283759	0.585271695	-0.149888754	-0.184332901	0.492795989	-0.435634931	-1.012658758	0.502395959	-0.107843825	0.143518612	0.150887332	0.479395189	0.099340189	-0.559497266
11.43933612	-1.426327686	-1.183704198	-0.26393317	-1.126926401	-3.551807296	2.23225154	0.387459194	2.139195171	0.387945886	0.721483161	-0.595341728	-0.402962859	0.831175836	2.622388863	2.07040646	2.006630021	0.204581787	0.005293341	-1.190446196	0.96964496	-0.678222485	-0.626180093	-1.020682453	-1.132486089	0.665153576	0.377353718	0.260760634	-0.113503721	0.005824229	-0.310234012	0.382237975	-0.181717628	-0.252136076	0.100026538	0.339971425	-0.190851416	-0.132622678	0.095855538	0.387299217
12.30268737	-4.31379196	3.249676823	1.186277219	0.181415348	1.688226081	-0.792258495	-3.098666105	-0.882173896	-2.12786322	0.448363588	0.134468765	-1.242109016	-1.763360774	0.695335198	-2.86894834	-0.835883144	-1.010417265	0.189420699	-0.309253665	0.72059421	0.369766608	0.737693085	-0.330968764	-0.443102833	0.533216825	0.078276796	-0.372144941	1.142848459	-0.266733499	-0.432640699	0.521018638	0.312369678	0.44254955	0.407955709	0.701569713	-0.419285577	-0.166496861	0.057863797	0.007717416
-15.23274726	-8.367423674	-2.603822548	1.959086266	3.053260797	5.160477949	1.240781114	1.792950841	0.324464878	3.627661995	1.665861171	-0.379617664	-1.85617646	1.446977273	0.104282683	0.297390948	0.125178422	-1.085019828	-2.130257072	2.449290795	1.778061185	-0.307312166	-0.112256904	0.176280042	0.486908451	-0.043042749	1.149650099	0.380253228	-0.662036422	-0.286367236	0.410198313	0.406210966	0.314899225	0.005761549	-0.267182324	-0.220363512	-0.509643612	-0.536026455	-0.253114575	-0.065965576
11.9929465	-11.21496205	10.15559062	-3.012231132	2.710965217	5.773558199	1.161351506	3.452860645	-1.965635993	0.27967462	3.410176402	-1.277251301	0.844954766	-2.035812522	-1.042721368	-1.425866886	-2.417804331	-0.410534754	0.966303739	-1.55123747	-0.350106473	-1.277358513	0.085325403	0.577505107	-0.393136028	-0.327828604	-0.208746958	-1.414761416	0.267789425	-0.712555682	-0.32278267	-0.358429537	0.019213477	0.395855591	-0.436800485	0.340865727	-0.30307134	-0.254748421	0.506220969	0.216380586
-1.069180293	-17.23868426	-1.679105597	-3.047694656	2.232728268	-0.63250235	1.313862324	0.76886952	0.930301695	-0.894674243	-0.080629336	-0.620382929	1.692501608	0.706685813	1.446124152	-1.858358176	0.054363602	-1.004134561	-0.032793624	1.79778243	-0.603486477	0.814310028	1.152840202	0.081890416	0.678352796	0.375147719	-0.604967991	-0.273056088	-0.094189696	0.307160297	0.752888554	-0.009567442	-0.203281228	-0.464528985	-0.030531338	0.15976415	-0.300897001	-0.299277351	0.097344763	-0.141623374
9.512636613	-10.35063363	4.48271515	-0.926880446	-0.47889693	2.125701783	-1.144280117	-1.176721487	-0.770291287	0.274616956	-0.138276034	-0.165699968	0.419096587	0.034495821	-0.392332224	0.454759849	-2.363436141	0.766063875	0.126154793	0.316741438	0.379019698	0.50944884	0.715807863	0.202295481	0.704865859	0.81223887	1.081752991	-1.010989071	0.403157618	-0.169613701	0.511881314	-0.342163251	-0.718005484	0.07227329	-0.166890538	-0.263351533	0.359466507	0.07447551	-0.248748774	-0.032640354
-2.743575776	7.500050393	-1.10004565	-4.578782412	3.505248546	-2.857870082	1.539014588	1.588836159	3.247279952	1.018729939	4.03043268	-0.39475391	1.179879072	-0.904949215	2.489913722	2.733403643	-0.130282127	0.394104688	-0.647886204	0.924244588	1.350298023	1.0425214	0.40444548	-0.823969603	0.932633545	0.312565778	0.282386042	-0.575000572	-0.586617921	-0.18242478	-0.502855872	0.140500324	0.429401469	0.597120737	-0.514315681	-0.24393514	0.136502646	-0.33186771	0.336925074	0.138235333
24.6861943	-16.88411528	0.896528273	2.402879089	-1.041449354	-2.464047304	1.353762128	-0.454752771	-0.647569094	3.098558695	3.090408577	-0.436989628	2.998756598	-1.612869538	-1.55194057	0.459510069	-2.49820622	0.563056997	0.166182271	-0.598847665	-0.606762337	0.251687391	1.005738706	-0.755133532	-0.099370176	-0.650504757	0.068441151	1.556002039	0.216600102	0.049302278	0.441571146	0.755066729	-0.260457752	-0.13496411	-0.043080716	-0.246343662	0.571212891	0.176729163	0.036569109	-0.097617655
3.701453192	2.208644619	-1.134337697	1.735257197	-0.900417366	-4.812524011	4.14983338	3.594212079	-1.315804484	1.746636232	-0.878858318	-0.259604577	-0.790636241	0.188919755	0.369802461	0.911853802	0.793613301	0.021672471	0.432778669	1.737061348	-0.358058058	-0.623560135	-1.197350436	-0.605367634	-1.563345742	1.202392152	0.566304423	0.170094632	1.104523171	0.974046167	0.688518137	-0.221224569	-0.146373983	-0.014772113	0.053832658	0.392627767	-0.397217097	0.205363079	0.258173373	-0.309288508
17.24146165	-13.82787382	0.341737204	-1.550901963	-0.52369905	4.19471832	-1.093402636	1.263483948	-2.667816888	1.461869337	3.965435215	-0.676082146	1.175578209	0.142535879	-0.03913999	2.164040296	-0.860690125	-1.20312204	1.758075061	-2.336031879	2.652195474	-0.859763066	1.820014993	-2.00497986	1.162055109	1.35478268	-0.107082838	-1.417878153	-0.789473496	-1.362868556	1.229439313	0.287041654	-0.394796886	-0.531725926	2.063666888	-1.643147398	-0.223062768	0.059537084	-0.249472962	0.351952839
-2.905032176	-0.128683439	5.684105733	-1.274266092	-2.526531037	1.817176511	-5.270191302	4.430454272	-1.587804041	1.752292386	1.031365634	-0.264628381	0.847834319	-1.976206581	-1.449413163	-0.126500963	0.667605204	-0.41013981	-0.721211897	0.270419653	1.375989118	-0.877803803	-1.154880657	0.432858311	-0.149022737	0.237196863	-0.036093868	0.643305889	0.529782536	0.772215484	-0.534144978	0.138577974	-1.215418151	0.721307442	-0.187708844	-0.380805345	0.577879764	0.382325723	0.104519748	0.16363094
-4.185008766	21.24391153	-3.358955153	-4.454354927	2.008525339	2.483894435	-0.207668866	3.064115137	-0.599339396	0.347831396	3.075870971	-0.58120641	-0.053192699	0.266352222	1.113521865	-0.467752642	-2.571695238	1.071533817	-1.175032758	2.519761938	0.985705618	0.402981458	0.700504713	0.184943805	-0.145378694	1.79742598	-1.851677444	0.663977607	0.168299566	-0.239950192	0.48283709	0.380441511	-0.325812758	-0.807546057	-0.543472826	0.318156094	-0.400557511	0.158842348	-0.203113869	-0.252647232
13.54484028	7.348931129	-6.114372112	-1.406690735	0.829192383	1.883927987	0.515889702	0.893795914	2.506082111	-4.706618113	0.103346123	2.383268827	-2.217562772	-1.215818969	1.216721021	1.589398701	-0.067246848	-2.411748487	0.649507226	0.12093162	-0.834899033	0.192307588	-1.120740593	-0.277931234	0.416635013	-0.274042687	-0.240831483	1.231636291	-1.119459966	-0.003385366	-0.552341574	-0.240698175	-0.312088331	0.122584864	-0.336268369	0.258237482	0.230233685	-0.151533219	0.058875867	-0.561826628
10.24472978	-4.858963145	2.221512051	2.499848887	-1.671588308	1.46472171	2.30021234	-0.321398593	0.969999372	0.17822712	0.375408809	0.624319656	0.312785143	0.248161084	0.246700272	-0.071843403	0.260649151	0.192898462	-0.345627698	0.441143492	-0.617032514	0.149028575	-2.354373871	-0.716902247	0.673458369	-0.141193355	-0.664549526	0.050348933	-0.169114313	0.104755193	0.310216704	-0.390467617	0.199213618	-0.024785208	0.757180115	-0.061518254	0.101950922	0.16279346	0.053668068	0.489902621
7.924684998	-13.00203087	-1.398572891	0.068791725	6.021248662	0.792071141	1.141753916	0.026832186	2.870462704	-0.020532257	-1.436226675	-0.158670839	1.743631466	-0.197047319	-0.887897555	0.63932554	-0.171429361	1.216576547	1.551433605	0.010494798	-0.339925024	0.870742381	0.253396817	-1.255511918	0.139332291	-0.626086823	0.391521356	0.431192534	-0.235744175	0.09217335	0.39578184	0.215682216	0.007587484	0.432931348	-1.073513429	0.026113794	0.29614198	0.295106844	0.450063156	-0.309521724
8.321818416	18.36341719	-2.719129389	-2.438042727	1.558528704	-2.258207312	-2.064462714	0.697558397	1.476255287	1.754820751	-1.443795481	-0.794481527	-0.280802811	0.190938571	1.669320195	-0.480590638	-0.439856445	-2.285211172	1.831640361	0.844854475	0.789614481	-0.046258122	-0.455198393	0.121624073	-0.255221315	0.486401259	-0.480030499	-0.253247761	-1.205610746	-0.025635463	0.476122649	-0.739991771	-0.169739052	0.541146578	-0.435845216	-0.350077515	0.906688345	-0.313262801	0.227269784	0.055496706
-4.133611465	21.28177465	4.606405739	6.270803589	3.567174716	-4.241114604	-2.144998368	-2.428698383	-0.262359763	1.077466297	2.684316094	1.586140863	0.896103198	0.812600923	-0.949581733	-0.266185866	0.984331679	-0.647529536	1.841856282	-1.384842488	-0.479031175	1.246031936	-0.139103097	0.204409901	-0.303490849	1.153629891	0.014055284	0.088742277	-0.173450303	-1.393371062	-0.240418958	-0.486915996	-0.612024522	0.699711192	0.227663033	-0.189003496	-0.407029606	0.454595892	-0.002982621	-0.035870403
-9.429185284	14.37063805	-4.496171528	-3.894425938	5.25892346	3.710328036	1.599990273	3.177081056	1.776662215	2.556947751	2.809196922	0.764698226	0.661126995	0.852081099	0.849165558	-0.491287726	0.226511605	0.897699077	-0.193657956	0.715316134	2.100207235	1.263167349	1.530161254	-0.106478423	0.434138151	0.644302527	-0.39405401	0.207704339	0.654847105	0.578987573	-0.302434501	0.387180538	0.131123675	-0.070471677	-0.425575896	-0.018957169	0.878590987	-0.013505921	0.065596027	-0.565852824
20.95876527	19.20625765	-1.049278458	7.39956572	3.119820417	4.533348433	-0.086408585	-0.523769183	-3.886356849	-2.340441887	-4.092777257	0.112554534	0.405349073	0.787057958	1.473854875	-1.099066192	0.537121334	-0.838071579	0.154751886	0.932426718	-1.322674192	-1.003698989	-0.909320212	1.152816786	0.406336742	-1.696780297	-0.711633562	0.177621147	-0.745873111	-0.359152678	-0.734570747	-0.181802785	-0.067667376	0.507817585	0.824017034	0.182191011	-0.228010304	-0.474282663	0.063365422	0.76965039
19.66805191	-3.785389017	2.434818936	3.492438677	-0.902770816	-2.115633435	1.074010726	1.443964565	2.257864567	-3.053899371	0.955277215	-0.585734715	-1.820239915	-2.028043406	-3.180516265	1.450057463	1.75457422	-0.311884062	0.682709479	-0.984760912	-1.194652239	0.196244116	0.694950013	-0.728016203	1.211733713	-0.080315585	0.018238058	0.286237557	-0.484402532	0.202204536	0.105246688	0.476443776	-0.990894678	0.596824083	0.469699979	-0.165616794	0.017210124	0.180487809	-0.099209116	0.071967295
6.543803788	87.43644076	-29.22877992	13.38260745	3.035406225	0.6155419	-8.918103346	8.678164264	-1.389296917	-7.675821605	10.29533378	-4.716756459	-0.646356372	0.180995876	1.26677108	-0.860635778	-2.996901444	3.107540182	-0.653828746	4.696373638	-1.319197376	-0.824251757	2.30532387	-1.750005159	-0.372626567	-2.25433899	-0.175013751	0.850095133	-1.106438463	0.99546352	-0.432596705	-0.034898863	-1.458592268	-0.129353035	0.331186997	-1.110158228	0.377407693	0.497157635	0.688892096	-0.438940909
4.26691938	2.767789153	4.158915934	0.541278561	2.572268579	1.085359568	2.497025424	0.196678023	1.393023078	0.618818366	-0.571103385	0.430708933	1.767857499	0.469522779	2.087726357	-1.625700997	1.355962739	1.257068961	0.833741728	-0.284789265	1.008051035	-0.88462969	-0.13920473	-1.126250114	-0.053821319	0.095900603	0.082625945	-0.634176627	-0.11474795	0.214127995	0.423853519	-0.086472059	0.349046005	-0.212877821	0.377141928	-0.144607946	0.718600901	0.464571756	0.03155863	0.380213052
1.560761872	2.996245231	8.321153013	-4.864757304	2.767411634	2.094393147	-0.857680154	-0.9624666	1.625682292	0.015991386	-1.511103573	0.736281011	-0.654907249	-0.770368357	-1.014917979	-0.697104403	0.066057027	0.737157898	-1.697414158	-0.705257722	0.421108577	0.187451583	-0.192015024	-0.297629166	0.504262033	-0.512047051	-1.404765165	0.079086903	0.011881093	0.466369754	-0.929765415	-0.228759849	-0.104666667	-0.065737757	-0.385583473	-0.146524572	0.606966164	-0.477691757	-0.11041056	-0.187013188
-2.406317433	-1.629011737	-4.512845056	-3.293609724	0.088192485	3.116824146	-0.052303762	1.94132674	2.350465822	-2.014396337	-2.326911268	-0.850128802	0.041848292	-0.446627109	0.376811602	1.408326841	0.831507526	-0.386756578	1.594127476	2.013846144	-0.253344526	1.516681659	-0.921046799	0.61202328	0.291764837	0.38767892	0.481880664	-0.023861334	0.05710474	0.815605584	-0.462605648	-0.120581034	-0.155864082	-0.390288809	0.334698429	-0.095569627	-0.531866464	0.333802872	-0.02033127	-0.226185791
-1.36550669	24.44728696	-14.65473349	1.42195022	5.822163458	-3.86680295	-2.280928692	4.357283187	-0.99520943	2.307103659	-1.799182933	-0.733228084	-2.40817548	1.028582904	-2.95195376	-0.229439371	-1.21827312	-1.419865213	-0.070165217	1.654377067	-0.121989138	-0.81672779	-0.119589626	-1.177008179	-0.757258745	0.473486779	-1.556237809	-0.39591399	1.012469193	0.348293965	-1.362623027	-0.109463655	0.304378114	0.886522148	0.462998091	0.712491051	0.268300141	-0.231734501	-0.105951398	-0.374290135
-1.661857028	3.235484132	-7.974922774	4.895089742	-5.380848418	0.420627933	0.377470017	2.146977747	-2.839021963	1.376889437	-2.735357789	0.940946032	3.830227867	1.879660574	0.41185777	0.914845532	-0.217940151	-1.306606132	0.563199631	2.552107401	-0.805433734	-0.791313872	-0.5671544	-0.710684857	0.653566736	0.548633887	0.329593132	-0.834061634	0.474056134	-0.313048374	0.219046836	1.07451629	-0.58915791	-0.044851684	0.173321669	0.273907979	0.299568756	-0.261476028	0.183648234	-0.308048809
-2.184414992	-5.109453654	3.373652987	-5.652056831	-1.927408843	-1.590811362	3.241971923	-0.914144275	-0.020612915	-1.036995385	-1.32294542	0.798611323	1.365210123	-0.915121429	0.674108353	0.127588563	0.580597604	0.450994139	0.266251865	0.348905376	-1.555348722	-0.291897841	0.112124774	-0.206293696	-0.932213204	0.631544193	-0.360675152	-0.027200853	-0.140992709	-0.219462368	0.290849419	0.331266007	0.12008968	0.351047809	0.364756184	0.065291346	-0.109932952	0.269368505	-0.376660224	-0.212261767
3.651663817	-5.149014353	-3.974847601	-6.025238219	3.482801109	-3.798369009	-0.638021398	-1.810735538	0.01238049	-0.99027056	-1.111008179	-0.76992353	0.022913394	-0.083064833	0.894232298	1.562707484	-0.805915295	-0.43857613	-2.387441718	0.212993708	-1.010220345	-1.701434571	0.84382396	-1.463120584	0.264666398	-0.257537653	0.351419703	0.05192707	0.133836285	0.093717971	0.685497553	0.91505031	0.983758384	0.188421562	0.847219215	0.091164669	-0.030392072	0.520020366	0.17064253	-0.424364467
-7.526966934	13.36678971	-0.483868478	-9.024047875	5.674701877	-3.20038616	0.813772488	0.385020081	-2.105305172	1.44137996	2.616361624	-0.60838354	-0.885187678	2.175159823	0.549366029	1.423006207	-0.842915096	-0.039458961	0.577293114	-0.838092879	0.288256428	0.196721483	-0.099096313	0.298210059	-0.450077332	0.690544077	-1.087797592	0.009641846	-0.565130172	-0.018919209	-0.350830503	-0.583473729	-0.079659463	0.216228809	-0.374083297	0.169485007	-0.149322198	-0.417449136	-0.309158469	-0.079069818
47.43615814	-14.96612754	-14.0738684	-0.821806086	-1.605483375	-0.496648884	-1.062322114	0.428829679	-0.636487161	-3.597172125	1.652034935	0.018111718	-1.096851575	1.83528145	-2.559806225	1.74152389	3.680570535	-0.013725313	-1.495029978	-0.764191637	-1.013415572	1.458175453	0.332257178	-0.85247815	0.405975013	-0.236676855	-1.186093741	-0.160076143	-1.297795071	0.083163049	-0.156068259	1.371766599	-1.086969369	0.285358521	-0.128092544	0.250591124	0.128495375	-0.238796424	0.176242051	-0.536022188
-6.075622532	-17.31747669	12.76065264	-1.842947295	0.596726312	1.758146827	1.622811513	3.133091371	-0.077482489	-1.351859893	5.150371032	0.862053056	3.192676338	-1.040182953	0.053485967	1.322769416	-0.074303901	-1.269699094	0.541360462	-0.05886468	1.069483955	-1.215741671	0.306369494	0.280301283	1.308798215	-0.106307209	-0.343189692	-1.761907196	0.36257201	0.160556394	0.107858421	-0.424222553	-0.205281314	0.262574571	0.835304864	-0.338544927	0.231146593	-0.667573471	-0.417148281	0.002007239
22.61569455	3.06128625	-4.42939449	0.636533357	2.086845812	0.990009607	-4.077972691	-1.976136962	2.234243709	-1.870344188	-3.536091114	-0.533413449	-2.22557501	1.349441611	2.865829762	-0.163552685	1.778221159	-0.528819611	-1.603339867	1.333116829	2.19678465	-1.26692016	-0.800819048	-0.521797736	1.152448658	-0.876235566	-0.281104797	0.365646471	0.118193197	-0.230152409	0.396504497	-0.299902682	1.016769881	0.195369004	1.067159437	-0.815617222	0.156112667	-0.597094315	-0.581137982	-0.18181717
23.01450202	-13.1680053	-7.668439678	-1.319248685	2.238370185	-0.410098599	-0.30937574	-0.593524183	-1.488709275	1.788360828	0.304147589	2.184010139	1.911545024	-0.452720358	-1.017792682	-0.29653708	-0.459360279	0.925949764	-0.820397932	-0.820262106	0.164545028	0.697066465	1.204857651	-0.743065896	0.420317236	0.829832139	-0.217511045	0.954582312	0.093101379	-0.734954939	0.261073797	0.237331092	0.091738279	0.280191356	0.385563834	-0.786395613	-0.033744912	0.069967638	0.329314743	-0.090675567
-5.817813068	4.230894773	-2.430696794	0.654170676	-4.719950401	3.650037615	-1.953204412	1.494589829	1.722244163	-0.119660257	-2.734918282	0.592428689	0.277316321	-1.082567277	0.798985978	-0.112341708	-0.790613638	0.570461477	-0.746524662	1.150247281	0.825097269	-0.231133424	0.999688957	1.209949762	-1.381945692	1.408927213	0.40228857	0.247058389	-0.210785827	-1.11189451	-0.329348077	0.52541745	0.182933924	-0.597965302	0.371351263	0.162016389	-0.079937221	0.417221869	-0.290853373	0.189542731
0.259224118	-20.90978515	-0.429955132	4.93821129	2.8595854	6.666410759	1.598344358	-1.319846038	0.402317638	-2.512699245	0.63057479	2.788174932	0.576539051	0.941217022	0.72266305	-0.352509336	-1.715469595	-0.637568106	-0.676195646	0.187505611	0.547163696	1.28501421	2.114575409	0.435895843	-0.210945873	0.466383565	-1.010721552	0.186761295	-0.41002812	0.227025543	-0.430327784	0.193029651	-1.179261336	-0.27285261	-0.047841931	-0.098102923	-0.357846812	-0.148684638	0.375837076	-0.234572197
11.85665059	29.73970743	-3.157674655	4.584096005	1.699005149	-2.94249781	-1.665659766	0.962681637	-1.330000685	-3.804244687	-0.936043197	-0.404838577	-0.392311377	0.532426206	-0.65998785	-1.770770101	-1.05350097	-0.245870937	-0.378882765	0.211684531	0.273732702	-1.441134622	-0.650363839	-0.150413046	-0.651053088	0.909410384	-1.404195943	-0.499501271	-1.511321957	-0.332319646	-0.330061822	-0.339133983	0.201931432	-0.028312536	0.840512204	0.18603409	-0.636111111	0.706553827	-0.486726276	-0.224120181
20.33235265	-1.076529672	-2.619564547	5.817290434	-4.023101229	-1.008080944	-0.209112205	-1.775757169	-3.326187085	1.450043455	-1.888890574	0.403546287	-1.433655387	0.076473355	1.238553781	-0.908765656	-0.929448751	0.68161203	-1.780507884	-0.155514934	-0.620932869	-1.784364123	-0.131042739	0.434548632	0.272570661	0.505177353	-0.32035349	0.090354438	-1.172636187	-1.09872194	-0.286833689	-0.723565304	-0.739750348	0.169308542	-0.252083335	0.292477016	0.006573901	-0.273080073	0.2052576	0.163411268
0.239150164	34.44939803	-14.10443474	0.492324685	4.209560097	4.490230939	-2.928606469	0.221936344	2.709449095	0.292209208	2.076301306	-2.845309801	0.373750238	-4.665104663	3.188309887	1.211437663	-3.648677071	-0.82027738	0.794164283	0.446168021	-1.022160046	1.973692108	0.474589875	0.890818702	-0.858101708	1.45427686	0.030549111	-0.045924726	-0.095927262	0.832109061	-0.892252601	0.05964476	-0.757314527	-0.1817901	0.539661005	-0.214212148	0.447110142	-0.114902324	0.19343643	0.482030104
5.526812648	-4.735544373	-5.07227624	2.493014293	1.42703171	1.458647119	-3.388330901	-0.393794752	-1.052318862	-1.450998749	-0.750721933	2.255023501	-0.920498399	0.442671839	2.358666135	-0.200891351	0.741010112	2.926077254	-0.388831785	-0.245697617	-0.467404519	-0.254331062	0.382638832	-0.690386296	1.685529272	-0.200531276	0.658900663	-0.408427637	0.010985918	0.127842871	-0.180382631	-0.411931753	0.271355627	0.406562394	0.866644019	0.58265744	-0.911567022	-0.207718108	0.023123846	0.201009969
19.91425291	4.887081803	-0.251028629	-3.710489835	-5.780525221	-1.691117212	3.046148648	2.055711549	-2.069311432	1.968570123	-2.270314049	0.012938232	-1.346804287	-1.687604239	-1.14023958	0.757805158	-0.312464558	-0.908346445	0.334516722	2.506313959	0.551876252	0.034561054	-0.475913944	-0.365315691	1.126455301	0.420536038	-0.945269487	-0.185742812	-0.303750393	0.564517037	-0.761510079	0.201492256	-0.104898071	0.292980726	0.559367559	-0.198601726	-0.193919194	0.0704561	0.072354255	-0.0220619
30.29630807	-16.08128721	-0.587494547	-4.237402346	0.926590528	2.069722178	1.538932211	-1.7421398	-0.110843388	-1.329783446	2.882073157	-0.880126106	0.17024525	-0.350293141	-3.069119291	1.374722176	0.384978016	1.830965308	-0.142518933	0.201674962	-1.676838545	2.173735069	-1.38869438	-0.741923749	-0.562779755	0.106979476	0.556328232	1.279591826	0.440996559	-0.569655324	-1.252223786	0.274542286	-0.508508755	0.182612733	-0.070524937	-0.375990782	0.465509397	-0.244075697	-0.388439153	0.208480318
4.62963437	2.88662806	5.966772618	-2.012695946	-0.850041317	4.041265844	0.977171713	0.916778637	-0.633211312	1.193729755	-2.476268685	-0.218286882	2.119650215	-0.730001256	1.84959563	-0.192984275	0.286504317	0.828029033	-0.766373991	0.593923926	-0.510153647	0.213158225	-0.263182652	0.808906686	-0.869340682	-0.556999684	-0.46463806	-0.816110357	1.304412043	-0.393621325	-0.297987484	-0.083197144	-0.456194288	0.536504216	-0.020653541	-0.101653635	0.099678656	0.311258544	-0.463420289	0.178282096
7.353661792	-21.64452949	2.679008207	3.402331269	5.931091814	4.575483498	0.041511607	0.654612699	3.092622365	-1.084082576	2.010765343	-1.643884238	2.840156921	1.425263938	0.015047001	0.022679084	-0.19543659	0.199830627	-0.274904128	0.169809364	-1.226468862	1.486986873	-0.117916487	0.225456794	0.367546576	0.780251498	0.15238032	-0.184198767	0.114957557	0.031620316	0.111164692	-0.137126514	-0.332065185	-0.476751582	0.376247804	-0.254326953	0.341059071	-0.118063636	1.021273593	0.101784247
31.00552424	-13.00050713	-6.226243689	-4.056964435	-3.239524298	0.464147047	2.02399062	-1.338751993	-3.057469308	-1.425192606	0.653691072	0.198808527	-0.667880724	-1.145751298	-0.479797107	0.16683015	0.985022874	-0.386356836	-2.104730286	0.075604475	0.484613611	0.138019918	-0.846352124	-1.208492016	-0.353987879	0.910469655	-0.450145246	0.388047475	0.25230666	0.01969225	-0.871727445	1.23753983	-0.15941382	0.628050682	0.444965162	-0.150379055	-0.194169843	0.035045983	-0.055292718	-0.441074833
33.68363388	-32.99575359	-16.0083466	-8.947233931	7.988730463	1.164198955	-0.427352968	-5.003564935	2.459397947	0.944698492	9.719505397	-4.466560715	-1.692297812	7.120045663	-6.580153885	-4.902611725	2.489798997	4.455545077	-1.402420921	5.980918957	-3.436220117	6.110177863	-7.793460208	3.399041286	-0.990760621	-0.601479341	0.810126343	-1.889968785	2.593197144	-1.799416676	1.324213536	-0.001778287	0.624345709	-0.904437309	1.798096314	-1.417885491	2.71330318	-0.477002841	0.417772151	0.182823107
5.533280133	-9.088799291	5.319091832	-5.258299278	-1.42188201	1.926297185	1.071241763	3.003715616	1.510422897	-1.692366792	1.584801039	0.856966103	0.761018012	-0.609359975	0.539538846	0.763323376	-0.086257591	-1.178668502	-1.192541635	-1.190320339	-0.556339874	-0.273762955	0.711594513	-0.090972343	0.623555485	0.01248981	0.843788386	-0.03987804	0.816901938	-0.059320514	-0.043584527	-0.1441356	0.107935747	0.530912723	0.469274095	0.333712868	0.171582239	-0.173675562	-0.154601955	0.206219852
15.20561679	-5.133201518	0.597765568	-3.497907831	-3.635847763	-2.526839678	1.68445251	-0.931130555	-2.176035849	-0.452201187	-0.242925005	0.132544684	1.496338767	1.743866958	-0.543569787	-0.262232137	-0.735079468	0.470112211	-0.665364929	0.515106489	-1.825720144	-0.629242276	-0.325417487	0.086940188	0.256962767	1.128874901	-0.103073274	-0.665846513	-0.234839386	-0.967342768	-0.355390747	0.649283739	-0.465410805	0.253057945	-0.263310182	0.086710614	-0.215699778	-0.167891404	0.124503093	0.126063865
3.115111427	19.91149876	4.685268616	-1.920089536	1.865953283	0.631110423	-0.031718731	-0.063786355	0.35008553	-0.362972293	0.842388334	0.782856756	3.068841643	-1.189685833	-0.167517463	-1.220127599	0.931778079	-0.721486997	-0.26211471	-1.143524004	0.584642635	0.22887012	-1.863036425	-0.552379861	0.248641247	0.878578829	-0.580038612	-0.152495363	-0.639921928	-0.036309595	-0.417475721	-0.325316787	-0.392310086	-0.251269192	0.045708343	0.099261278	-0.398191559	0.173994445	-0.202262855	-0.251336541
19.09239994	2.362946885	-0.100093816	1.045812761	0.765943253	0.140640568	-3.075687532	2.368733571	-2.017588829	-4.292636088	0.540720742	1.603319149	1.03830461	-1.413905146	0.551535753	-1.326572315	0.156913677	-0.940590205	-1.020314352	1.428307365	-0.118102276	-0.680365563	2.501362637	-0.058780004	-0.508085319	-0.280096954	0.811363312	0.554708636	-0.700511544	0.063989202	0.169235416	0.791542146	0.567337333	-0.66814491	-0.192000836	0.270014332	-0.13446577	-1.10854525	-0.133365179	0.378195839
4.863275915	5.159102835	8.840895734	0.65446866	-2.616861284	-0.091133782	0.548835613	-0.029089468	-1.421084046	0.157231955	2.025339053	1.257932697	-1.929779742	0.662919054	-0.741440182	0.635215167	-0.806560921	-1.758353114	1.065261033	0.770603357	-0.884127389	1.185234288	0.038452407	0.406393653	0.439681326	-0.79353316	0.069269289	0.031214759	-0.695496806	0.230276077	0.20657151	-0.296556438	0.136098616	-0.048376631	-0.277210528	-0.121215078	-0.32778485	-0.156310642	-0.140495254	-0.436636235
19.81077618	-0.008458676	-1.601265138	0.602099778	0.063050735	-1.565289702	0.677591902	1.094757965	0.50705236	1.363485016	-0.04594737	-1.057742106	0.395303098	-0.479051569	-0.620027154	0.490444179	-0.73676775	-1.130994129	0.860783917	-0.66153945	0.105105535	-0.297420862	1.012139851	0.416316704	0.043819849	0.022444216	-0.105224467	0.756542465	0.563083825	0.097506498	0.397100187	0.999175965	-0.229281638	-0.449704567	-0.454524005	0.214311462	0.068654933	-0.545418742	0.869981605	-0.188014274
20.11784206	7.111079993	-1.606389011	-2.983503663	-2.642212947	-0.356901592	-1.57183884	-3.73820485	0.227523651	0.771738239	-1.572117102	1.034194848	-0.936030714	-1.33173162	0.924792168	-2.222725647	0.032414701	-1.017701451	2.146304022	1.496614329	-0.002620698	-1.606934043	0.125782964	0.523409753	-0.365041392	-0.12970583	-0.549118915	0.558786973	-0.007228513	0.331022365	0.255162219	0.067224805	0.118502169	0.286846688	-0.838256141	-0.413457114	-0.11684461	0.245536822	0.166954044	-0.841766715
34.48468847	-9.769903452	-2.840564518	-4.209931441	3.000751752	0.83367595	-0.536834711	-2.700970594	2.443008075	3.34200323	2.429401712	-1.640037959	-3.222519369	0.989519783	-2.863487862	-0.187663693	1.261454505	2.478790099	-1.105386683	1.067775595	-0.834089491	2.090510281	-1.758069914	0.506916592	-0.659720181	-0.223959243	0.349971851	-0.347790338	0.333233388	0.780598039	-0.392504349	-0.392012078	-0.341023208	0.404891375	0.179616445	-0.53759094	0.278767883	-0.322629192	-0.224510298	-0.244169244
6.344202282	-2.546046261	-1.578239702	0.831616898	-2.763934494	0.540892695	0.792719963	-2.479657449	0.256362313	0.267344455	-0.219579511	-0.98122639	-1.81789073	2.733775191	2.551604167	-0.094042656	1.423479467	-0.085454051	0.040456221	1.036794091	-0.28676941	-0.988023457	0.213605456	0.265493848	-0.080678323	0.130026216	-0.253229533	-0.432560177	0.464233996	0.301951129	-0.244019491	0.398866767	-0.552858936	-0.233534368	0.317949462	-0.334332395	0.027794716	0.208054509	0.491469877	0.739151177
23.60657852	-5.310671455	-0.112606139	-3.25178311	-1.382234086	2.5401656	2.540836147	0.254413632	0.513817033	1.994620193	0.727319449	-1.51654919	-1.594274145	-0.339099207	0.05501725	-0.30007843	0.712110363	0.270131562	-1.577963711	-1.246855533	0.029148787	-1.508419871	-0.059892347	1.453661079	-0.953541729	-0.652932557	0.538576053	-0.075436341	0.227748859	0.737800527	-0.147643544	-0.645362831	0.071139546	-0.00569912	0.377251073	0.790586294	-0.250498015	0.279803734	-0.222647355	0.028884709
9.298992062	3.37559803	11.0477387	1.424066422	-0.308448825	-1.883758955	0.981254223	0.319778426	0.752632396	0.759978457	2.151276063	0.094553244	0.291968182	0.889920422	-0.116964382	-0.011472097	-0.343438301	-1.350918773	-0.336668159	1.03196003	1.359382814	0.075259622	-0.264917088	-0.23069029	-1.38640609	0.092355079	0.131657162	-0.555170759	0.503692834	0.123504729	0.830099067	-0.031658998	-0.14423176	-0.287972026	0.221823277	0.838065199	-0.299312381	-0.432652734	-0.240347199	0.24278724
31.96288969	-0.766954446	0.835955325	3.942748133	-2.230731078	0.558824384	-0.435841034	-3.114207544	-4.167181628	1.190867885	0.38344759	1.85238148	-1.471054391	-2.584385137	-0.331142695	1.053088047	0.452830704	1.440852537	0.337146835	1.236985051	-0.608515153	-0.238128034	-0.236458559	-0.519169499	0.235855692	0.686201906	-1.019548958	-0.14136394	-0.104792354	-0.585165303	0.09000984	-0.476772472	-1.093266705	0.655911087	0.585133478	-0.513132052	-0.306031419	-0.215792291	0.291962018	-0.379440672
-0.895307956	21.00428463	2.836233529	-4.436953595	1.630460892	2.634703556	1.957027864	0.315347381	2.045311861	-2.270220336	3.365788709	-1.099934239	-0.719823635	-0.624579977	1.21252686	0.102416786	0.04531003	1.923145631	-0.748882247	1.439576299	-0.175963084	-0.464851607	2.303049386	0.174695404	0.833494266	-0.905276609	0.593772204	1.213005884	0.119492781	0.505570713	0.525265479	-0.127544513	0.379470091	0.376865724	0.48485432	-0.103175045	-0.450114518	-0.316845331	-0.057275893	0.176039621
36.28075556	-6.033649324	-6.719079218	-2.749849828	-5.290343305	-1.619504265	-4.753158228	-3.663481834	-4.113810845	4.322900915	4.357857815	2.69675583	0.796686007	-1.227993529	-0.289546281	-1.060085965	1.420276091	1.41875677	0.613910093	0.514490168	0.660943179	0.074200871	-0.21314508	0.235665547	0.426998299	-1.548074968	-1.328864953	1.520563061	0.998720328	-0.491192815	-0.004804749	-0.182088621	0.465201451	0.014235032	-0.450403041	0.064136373	0.924362934	-0.542432499	0.113637177	-0.106682994
6.695862662	14.73399446	-4.189096218	0.863646561	6.703175612	-0.025215425	-7.164013986	11.42708386	6.900954926	-0.67106925	-5.871343045	2.434127124	-3.502561853	7.223918288	-4.594880893	1.304079392	-1.310531877	-1.034879555	-1.902109701	4.775309815	0.614777559	1.396369079	0.242826648	-2.043659337	-1.343827759	-2.852654175	1.03915809	2.123603262	-1.072877484	0.224297804	-0.306643583	-0.598402107	-1.643307336	0.785038662	0.703836177	-0.301715653	-0.067189618	-0.363394486	0.30398749	-0.805311616
-2.201159137	6.964092173	5.957360534	-1.273917187	0.463418827	-0.317154947	-2.603242864	3.019548762	-2.157563843	0.776707885	-1.065905083	-0.018582236	-1.211374135	0.962051981	2.065596331	-0.526519567	1.181441668	-0.491817737	-1.997861131	0.389319511	-1.728798961	-0.251444773	0.67523336	-0.273677237	0.268205943	0.270970598	0.161074843	0.807888981	0.064464979	-0.725443071	0.08657591	-0.117976842	-0.890251038	0.347190935	-0.009647585	0.332727704	0.402109501	-0.073382085	0.095280227	-0.108926316
0.617923237	3.973638419	8.786306178	-4.6176473	2.727042691	0.902600931	-1.532679533	0.636391731	4.518542509	0.435095688	0.164968336	2.509824387	-0.184448877	2.232058417	-0.227742499	0.974114528	0.79656665	-0.351992403	-0.651505704	2.433034767	0.325691512	-0.238472732	0.781077191	-0.084722009	0.147901307	-0.729644958	-0.014004976	0.892699064	-0.41952946	-0.146189524	0.121538633	0.09057142	-0.247946959	0.301653349	0.221928355	-0.383969723	-0.347686121	-0.556423173	0.462900917	0.108796907
3.288829376	2.363678043	1.985120169	1.713079353	-5.123824695	-0.299786048	1.49252046	-0.792795512	0.358659342	1.779905263	1.138473991	0.695890505	-0.846092373	0.556402233	-0.198689486	-3.189813975	0.051074784	0.097317213	0.956380793	1.361558254	0.145168823	0.107110971	0.301171436	0.450452925	-0.595504939	-0.356878766	0.213883829	-0.989306649	0.498339293	0.401192606	-0.568206638	-0.779180631	0.241033846	-0.029530514	0.089386657	0.077451025	0.25438539	0.046293162	-0.39963678	0.471848725
14.72993306	15.02217721	-0.429571917	1.923203689	-1.420636995	-2.59891925	-1.469835504	0.624421131	-0.953478524	2.069654817	-0.42699061	2.448080806	-0.25153044	1.129540374	1.520573211	-0.753968362	0.67175484	-0.458882943	0.264835609	1.95744794	0.277594356	-0.021904459	-0.048936842	-0.632529732	-0.210625806	1.134590679	-0.228981763	0.342306265	0.012099504	0.04265137	-0.539094643	0.851555972	0.005343816	-0.83606226	-0.417285334	0.136747354	-0.142201595	0.110766976	-0.52304238	0.13607533
4.208316198	2.150566508	2.901968617	1.230206119	-1.619654715	-3.926317003	0.131495371	-1.826672922	1.14399868	1.014275294	0.966181681	2.087603296	0.688543949	-1.708841168	0.87530056	-2.114508716	0.888926526	-0.629551227	0.488599294	0.436078124	-0.417385429	-0.076755079	0.964316554	1.026254881	-1.188620433	0.234494993	0.959367974	0.334083881	0.220304278	0.588440508	0.021967316	0.023262511	0.025447872	-0.332641413	0.165027091	-0.041241476	0.235465175	-0.135858919	0.515670512	-0.035212989
9.329615251	4.950409206	9.59791573	-6.654763251	-3.436400287	-1.777113428	2.940488566	0.893418177	2.596869634	-1.034712103	1.600727861	-0.583170418	-1.374701071	0.820013646	-0.621562353	-0.193419828	0.297266382	-0.615657592	0.746899379	0.929354252	0.120907659	-0.644081594	-0.698341287	0.065250622	-0.275936128	-0.163367282	0.335041988	0.500756596	0.274563307	0.311110591	-0.374593741	0.029396104	-0.386576565	0.02665579	0.082372893	-0.042096652	0.090872834	0.187498718	0.312619033	0.256347033
-4.970602689	7.286596268	0.756429881	-1.269955905	-1.03459087	1.344804398	2.069697262	-3.171414471	0.666356168	-0.448698215	-0.895603252	-0.038431611	0.220796275	-0.313662968	1.192602829	-0.376199785	0.034700758	0.067196339	1.124294953	0.677155035	0.423886623	0.118137621	0.578311216	0.314515203	0.037983258	-0.01244054	0.345221362	0.497965084	-0.041954603	-0.580197433	0.1966279	0.136060755	-0.219690586	-0.195569571	0.183504114	-0.181677151	0.377679349	-0.340058768	0.479524232	0.131667211
-0.807323089	28.57584128	-7.01768261	18.11310311	1.329427699	0.627673585	-7.320421221	1.315830668	-1.75797373	2.305824174	-2.776195365	1.046200151	-1.820158539	3.000327982	-2.48800209	1.051107089	0.573531322	-0.606428001	1.488700858	-1.137010674	-2.243079178	0.769442147	-0.166740492	-0.327539014	-0.678694924	-0.089211931	-0.755694954	-0.644424001	-0.593374035	-0.504717201	0.59115843	-0.96826268	-0.252222495	-0.544119623	-0.857200886	0.761861714	0.758488533	-0.203125609	-0.591381593	-0.299971803
19.56006454	-20.97960925	1.11029348	12.87414061	5.856639133	2.951800967	-5.170164179	1.156161112	-1.981385903	-2.255368078	2.150212179	-3.522999501	2.169559431	0.158390952	-1.175100218	1.686409419	-2.720238262	1.404659454	-1.004841127	-2.070859151	2.255180785	-0.474822035	-0.120065931	-2.4319717	2.178232384	0.742957629	1.337374764	-0.56869622	-0.148263427	0.045975643	0.886242119	-0.53238933	-0.31590505	-0.553092808	0.909567418	-0.350653668	1.306487278	-0.673336528	-0.327689622	-0.368718533
2.526487174	12.28250109	-4.206958183	10.54973937	3.325234829	-3.084779598	-1.342920474	2.120395186	3.093588354	-0.250105827	-3.810280501	-0.488634501	-1.330585028	1.76710646	1.866940283	2.234172977	-0.41179865	-0.943876808	-1.80386803	-1.217449193	-0.172064492	-1.192796045	-1.680733693	0.719893556	-0.212948265	0.408788892	-1.268094461	0.522031792	-0.169179401	0.463678986	0.117222339	-0.547110932	-0.115003043	-0.676766835	1.010792593	-1.184291387	-0.14052196	-0.475082462	-0.031932249	0.070485252
31.92709393	-13.92439521	-2.713986582	-2.242304268	-3.185638337	4.975666919	-2.092111149	-2.632400267	-4.949390095	3.433187614	1.766277442	-1.736511058	-0.736300615	-0.330641009	-3.325743565	2.547146605	-1.112643846	0.911798401	-1.510671674	-0.520654831	0.417924353	0.341666317	-0.587543341	0.473811515	-0.672954304	-0.459599426	0.820507507	-0.051108933	0.121220867	0.2280842	-0.113342554	0.594145546	0.229720077	1.173507341	0.075686144	-0.213428814	0.033988056	0.023276061	0.121337478	-0.536072476
34.44937257	-13.4005987	-7.348983425	5.544771819	1.676580871	1.853752236	0.072891957	-0.762069201	0.896474384	-0.666489255	-1.447840873	-1.449289727	1.575746778	0.261858074	-0.175236584	3.259982285	-1.69072357	-1.669806241	-0.563036899	-2.510882571	2.276447373	0.351149129	-0.069368833	-1.368316715	1.302244034	0.354706657	-1.127545996	0.818863352	0.102450893	0.532978024	0.622273205	-0.542824483	0.302188384	-0.044551818	1.680811601	-1.368184412	-0.647327705	0.143652926	0.061531112	-0.460681582
7.205167252	5.093259858	-2.264353007	4.557164063	0.414156147	1.215512291	-1.449241332	2.958971286	-1.464672765	1.246720956	-0.863149094	2.887951982	-1.894122071	-1.635574784	-1.029680893	-0.209911335	-1.269127131	-1.357696447	-0.346223809	-0.048029591	-1.839984303	-0.855409835	0.87962912	0.355509779	1.250720639	-0.008097125	1.147790167	0.069973979	0.052766267	-1.563100346	-0.430370668	-0.272064842	0.187552811	-0.011072477	-0.336545351	-0.284890837	0.750358214	0.509552664	-0.192314395	0.079333957
48.86695898	-11.60249425	-12.95334532	-3.067715587	-0.653916174	-0.173189333	-1.164790898	-2.797873819	-2.104314923	2.210807043	3.613136742	-0.295764936	-2.307475672	0.036172124	-2.517760922	0.574067535	2.070339303	0.045948463	-2.424408605	-2.537029011	-1.180392849	0.80371809	0.65095233	1.179814558	-1.041322015	0.262519947	0.541508009	0.199555759	-0.397519238	-0.625058077	0.706407981	1.075874685	-0.056085294	-0.605851856	-0.412870659	-0.545735442	0.115405192	0.249442557	0.332974858	-0.269886976
52.15953459	-6.681790643	-14.0701829	-2.454966331	-4.249378362	-0.013853677	-0.999756148	-3.205865086	-3.201915102	0.392580853	2.720702338	1.24428306	0.288402475	-1.987890135	-4.13596824	0.775401262	1.971291832	0.576647198	-1.780749877	-1.909869496	0.932291857	2.889986468	0.903438635	0.049078815	-1.321206351	0.776046926	0.536848439	1.333439894	0.247922333	0.516238627	-0.503839868	0.693139234	-0.257624778	0.535147791	-0.379637435	-0.431241645	0.801920333	-0.279824707	-0.21771696	0.377221647
32.5507945	-7.741547127	-3.808238685	-0.695578283	-3.471791711	-3.058664113	-0.067611232	1.102502186	-0.183335179	4.314191179	0.390684461	0.945448273	-0.121074318	-0.420313735	-0.78624918	2.874283028	-0.789299149	1.822135907	-0.128810393	0.437289507	-0.206829817	-0.95042692	0.474441485	0.679894211	0.643825055	1.531888597	0.969140052	-1.120002249	-1.927803102	-0.450341889	0.906153286	0.680076286	-0.963020079	-0.355325124	0.365099233	-0.116755132	-0.569929515	-0.513543918	0.285790406	0.064131398
33.65550221	-7.788970312	-6.409820922	-3.13974731	-4.4361318	-1.595854387	-0.88847679	1.129556052	0.766952929	1.837243088	0.518568833	-0.025263385	-1.340126552	-1.278297234	-1.711398018	1.609513615	0.018460295	0.282888443	0.823553089	0.625099495	0.690094748	0.984580597	-0.279360857	-1.255202858	0.24486573	0.103626517	0.25738244	1.501153226	-0.371839374	-0.398977908	-0.808307984	0.199013124	0.113798948	0.032058928	-0.923355506	-0.182797799	0.382082954	-0.107784956	-0.217053198	-0.200666059
2.469396246	-3.737926721	2.503882276	2.966231157	1.097145197	-6.382918259	1.06205615	5.011507535	-2.424368907	1.721071094	-1.703666953	0.742905908	-0.253428601	-0.060035826	-0.393128972	-0.218972001	-0.214245791	1.877080228	0.314873472	0.671390401	-1.348262106	0.508799751	-0.00035872	-0.72866284	0.392623644	-0.167873727	-0.631600575	0.49743166	-0.543918738	0.494228692	0.435540287	0.073370452	0.060648555	-0.547284413	0.573810218	-0.685347777	0.126625175	-0.65140064	0.248431763	0.478127657
-6.513750508	13.39793447	-5.610089484	-6.919691649	9.84069382	-0.870869775	-1.310312829	3.311081283	-2.646097579	0.417627621	0.40528589	-0.220355165	-0.470375878	-0.144214359	0.642364448	-0.755739899	-1.383489038	0.95365598	-0.244266841	-0.389501174	0.920393044	0.157715265	-0.067376729	-0.686788931	0.481917329	0.516892447	-0.544493659	0.325078153	-0.336423006	-0.855536043	-0.590172272	0.095274909	0.262904636	0.206307942	0.376438728	0.350001776	-0.388699777	0.142959496	-0.239351022	-0.335331281
7.636453325	15.19854135	-5.052042422	1.821269063	-2.190006346	-4.748850784	0.998998549	0.803329494	-0.106057241	0.62313766	-1.764801806	-0.573525761	-0.171517879	0.820749099	-0.494125263	-1.394273607	-0.643377498	-0.101637501	0.617090581	-0.270731453	1.027108976	0.053797229	-0.548059739	0.612791866	0.337256275	0.476208216	-0.30958253	-0.418788332	0.292788762	1.65589317	-0.816753656	0.150931484	0.439720326	-1.088827057	-0.393525046	-0.666103636	-0.180488292	0.222675568	0.100802948	0.886252345
29.77290998	2.449163663	-1.557289507	2.320142462	-1.330718099	0.120633289	-1.583745773	-1.949859158	-5.959347918	0.554517718	-0.956917051	0.393003506	0.638276966	-0.68683719	2.128045251	-2.072260007	-1.013963474	0.000292329	-0.356885581	0.366742181	2.29090773	-1.098785868	-0.83116129	0.265986065	0.852935546	0.529287029	1.363898739	0.148542979	-1.157060618	0.299329525	-0.326661334	0.92336794	0.313671657	-0.321715988	0.123673744	-0.170082502	-0.686199412	0.467280705	-0.613610236	-0.304887687
32.3117991	5.95371584	3.204613545	6.025781266	1.290381608	-0.616310914	-0.546982376	-3.988806631	-6.919948399	-0.593927103	0.808517716	4.644495639	0.405949698	-0.51798216	0.080096932	-1.10177602	-0.205789965	1.525759927	-2.068610507	0.610834789	0.029817809	0.204902095	0.85355746	0.33527893	0.325696407	0.168501338	0.64860891	-0.718542707	0.178714456	0.039338053	0.010322518	1.114645748	-0.612322501	0.519156416	-0.835199715	0.240735236	-0.32141831	-0.056776828	0.134017348	-1.202366549
34.2906227	11.48729625	-1.284253644	4.973370326	-3.502664064	-0.951574405	-0.141099075	-2.960310316	-2.182976152	-0.404140038	-1.389037087	-0.031945388	2.170111375	1.376801868	0.65128197	-1.567723632	1.44520246	1.114632578	-1.004564946	0.254860397	1.545170405	0.266051442	-0.864415874	1.786885158	-0.094470376	-0.254007698	0.140450719	-0.25592969	-0.690476721	0.191432801	-0.327902165	-0.777982791	0.703004909	-0.523943348	0.124549089	0.886403968	-1.440475962	0.347438583	-0.317800495	-0.0566008
[truncated: 2,424 more rows]
